# Supplementary material
Source: PubMed Central journal article supplement (PMC7491284)
Supplement: NIHMS1624881-supplement-supp_info.pdf [file NIHMS1624881-supplement-supp_info.pdf]

## Supporting Information

| <b>Index</b>                                                                                 | <b>Page</b> |
|----------------------------------------------------------------------------------------------|-------------|
| General                                                                                      | S2          |
| Preparation of Ligand <b>L1</b> to <b>L5</b> and <b>CC-L1</b>                                | S3          |
| Procedure for <i>trans</i> -selective Cyanoboration, Ligand Screening (Table 1)              | S8          |
| Preparation of Enynes <b>1</b> and <b>2</b> in Table 2 and Table 3                           | S9          |
| General Procedure for <i>trans</i> -Selective Cyanoboration Reaction of 1,3-Enynes (Table 2) | S15         |
| Assignment of the <i>trans/cis</i> Configuration of the Products                             | S20         |
| General Procedure for <i>trans</i> -Selective Cyanoboration Reaction of 1,3-Enynes (Table 3) | S22         |
| Functionalization of Cyanoboration Product (Scheme 4)                                        | S25         |
| Synthesis of Satigrel (Scheme 5)                                                             | S27         |
| Crystallographic Data for <b>4b</b> , <b>4j-B(pin)</b> and <b>5g</b>                         | S31         |
| NMR Spectra Collection                                                                       | S34         |
| References                                                                                   | S132        |

## General

$^1\text{H}$ ,  $^{13}\text{C}$ ,  $^{31}\text{P}$  and  $^{19}\text{F}$  spectra were recorded on Varian 400, 500 or 600 MHz spectrometers, and  $^{11}\text{B}$  spectra were on an Inova 500 MHz spectrometer at ambient temperature.  $^1\text{H}$  NMR spectra were reported with the solvent resonance as internal standard.  $^{13}\text{C}$  NMR spectra were reported with the solvent resonance as internal standard.  $^{11}\text{B}$  NMR spectra were reported with  $\text{BF}_3\cdot\text{Et}_2\text{O}$  ( $\delta$  0 ppm) as the external reference.  $^{31}\text{P}$  NMR spectra were reported with  $\text{H}_3\text{PO}_4$  ( $\delta$  0 ppm) as the external reference. IR spectra were recorded on a Bruker FTIP Alpha (ATR mode) spectrometer. High-resolution mass spectroscopy data were obtained at the Mass Spectroscopy Facilities at Chemistry Department of Boston College with DART ion source in positive ion mode.

All oxygen- and moisture-sensitive manipulations were carried out under  $\text{N}_2$  atmosphere with standard Schlenk techniques or in  $\text{N}_2$  glovebox.

Hexanes were purified by distillation before using in column chromatography. Solvents used under  $\text{N}_2$  atmosphere (pentane, THF, benzene and  $\text{CH}_2\text{Cl}_2$ ) were purified by passing through a neutral alumina column under argon. 1,8-diaminonaphthlene (dan) was purified by distillation under attenuated pressure followed by recrystallization with hexanes/EtOAc. 1, 2-dichlorobenzene (*o*-DCB) was purified by drying with  $\text{CaH}_2$  and subsequent distillation under attenuated pressure. Ligand **L5** was prepared according to literature procedures.<sup>1</sup> All other chemicals and solvents were purchased and used as received.

## Preparation of Ligand L1 to L4 and CC-L1

### Synthesis of *t*-butyl-substituted 1,4-azaborine precursor S3:

#### Reaction sequence:

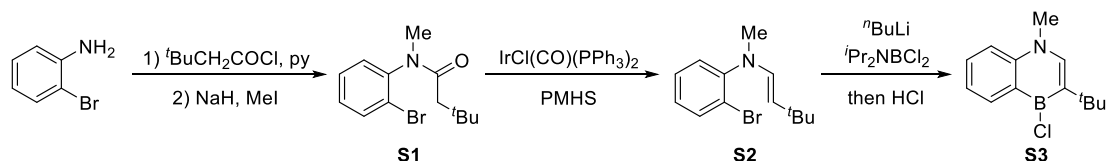

#### Step 1:

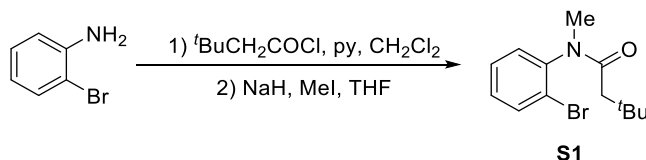

To a solution of 2-bromoaniline (5.10 g, 30.0 mmol, 1.00 equiv.) in CH<sub>2</sub>Cl<sub>2</sub> (100 mL) and pyridine (2.50 g, 31.5 mmol, 1.05 equiv.) *t*-butylacetyl chloride (4.24 g, 31.5 mmol, 1.05 equiv.) was added in a dropwise fashion at 0 °C, and the mixture was allowed to stir for 4 hours. At the conclusion of reaction, H<sub>2</sub>O (60 mL) was added, and the organic layer was separated, which was further washed with brine (60 mL) and dried with Na<sub>2</sub>SO<sub>4</sub>. Removing of all volatiles *in vacuo* resulted in a white solid, which is used for next step without further purification. Then, THF (80 mL) and NaH (1.80 g, 60% in oil, 45.0 mmol, 1.50 equiv.) was added in 5 portions in 20 minutes. The resulting mixture was allowed to stir for another 30 minutes at room temperature, followed by the addition of MeI (6.40 g, 45.0 mmol, 1.50 equiv.). After allowing the mixture to stir for 2 hours, H<sub>2</sub>O (60 mL) along with Et<sub>2</sub>O (30 mL) were added to the reaction mixture. The organic layer was separated and washed with brine (50 mL) and dried with Na<sub>2</sub>SO<sub>4</sub>. After removing all volatiles, **S1** was obtained by distillation under attenuated pressure (130 °C, 250 mmTor) as a white solid (88% yield).

<sup>1</sup>H NMR (500 MHz, CDCl<sub>3</sub>) δ 7.66 (dt, *J* = 8.0, 1.5 Hz, 1H), 7.37 (tt, *J* = 7.5, 1.3 Hz, 1H), 7.25 – 7.19 (m, 2H), 3.16 (d, *J* = 1.6 Hz, 3H), 1.89 (t, *J* = 1.1 Hz, 2H), 0.97 (d, *J* = 1.7 Hz, 9H); <sup>13</sup>C NMR (126 MHz, CDCl<sub>3</sub>) δ 171.8, 143.4, 133.9, 130.2, 129.5, 128.9, 123.6, 45.6, 35.8, 31.2, 29.9; IR (ATR) 2952, 2866, 1661, 1475, 1433, 1372, 1361, 1280, 1249, 1117, 1064, 1030, 765, 728, 690, 568, 457 cm<sup>-1</sup>; HRMS (DART) calcd for C<sub>13</sub>H<sub>19</sub>NOBr ([M+H]<sup>+</sup>) 284.06445, found 284.06500.

#### Step 2:

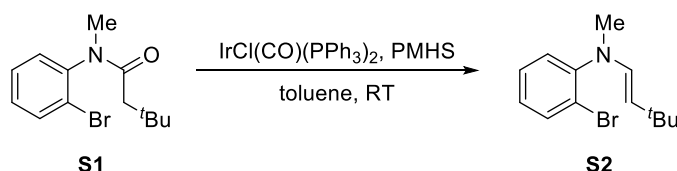

To a 250-mL round bottom flask charged with **S1** (2.80 g, 10.0 mmol, 1.00 equiv.), toluene (30 mL), and PMHS (polymethylhydrosiloxane) (2.60 g, MW 1700-3200, 40.0 mmol, 4.00 equiv.), was added a solution of IrCl(CO)(PPh<sub>3</sub>)<sub>2</sub> (4 mg, 0.005 mmol, 0.0005 equiv) in toluene (5 mL) in a dropwise fashion under nitrogen at room temperature. Gelation was observed, and the reaction mixture was allowed to stir for another 30 minutes. Et<sub>2</sub>O (60 mL) was added, and the mixture was passed through a celite pad. The filter cake was further washed with Et<sub>2</sub>O (30 mL) for two times, and the filtrate was combined. All volatiles

were then removed under vacuum and **S2** was obtained by distillation under attenuated pressure (95 °C, 280 mmTor) as a colorless liquid (90% yield).

<sup>1</sup>H NMR (600 MHz, CDCl<sub>3</sub>) δ 7.57 (dd, *J* = 8.0, 1.5 Hz, 1H), 7.26 (tdd, *J* = 7.2, 1.6, 0.6 Hz, 1H), 7.09 (dd, *J* = 8.0, 1.6 Hz, 1H), 6.97 (tdd, *J* = 7.2, 1.6, 0.6 Hz, 1H), 6.15 (d, *J* = 14.1 Hz, 1H), 4.64 (d, *J* = 14.1 Hz, 1H), 2.98 (s, 3H), 1.08 (s, 9H); <sup>13</sup>C NMR (151 MHz, CDCl<sub>3</sub>) δ 148.8, 134.0, 132.9, 128.3, 126.3, 125.5, 119.9, 115.2, 38.4, 31.9, 31.3; IR (ATR) 2952, 2900, 2864, 1650, 1584, 1481, 1461, 1420, 1356, 1320, 1251, 1238, 1129, 1117, 1026, 981, 937, 753, 723, 656, 446 cm<sup>-1</sup>; HRMS (DART) calcd for C<sub>13</sub>H<sub>19</sub>NBr ([M+H]<sup>+</sup>) 268.06954, found 268.06955.

### Step 3:

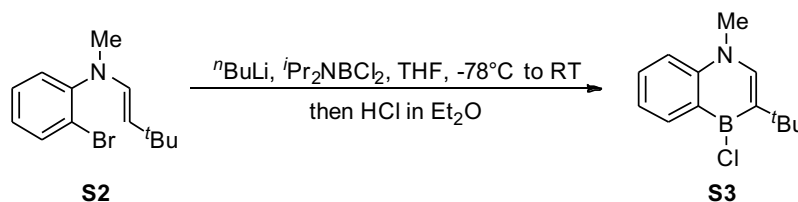

To a 100-mL round bottom flask charged with **S2** (2.42 g, 9.02 mmol, 1.00 equiv.) and THF (30 mL), was added *n*-butyl lithium (3.60 mL, 2.50 M in hexanes, 9.00 mmol, 1.00 equiv.) at -78°C. After allowing the mixture to stir at -78 °C for 20 minutes, a solution of *i*-Pr<sub>2</sub>NBCl<sub>2</sub> (1.64 g, 9.00 mmol, 1.00 equiv.) in THF (3 mL) was added. The resulting reaction mixture was allowed to warm to room temperature in 2 hours. Then, HCl (4.5 mL, 2.0 M in Et<sub>2</sub>O, 9.0 mmol, 1.0 equiv.) was added, and the mixture was allowed to stir for an hour. At the conclusion of the reaction, the formed precipitate was filtered off, and the filtrate was concentrated. The resulting crude material was purified by recrystallization from pentane/CH<sub>2</sub>Cl<sub>2</sub> to furnish **S3** as white crystals (36% yield).

<sup>1</sup>H NMR (500 MHz, CDCl<sub>3</sub>) δ 8.55 (dd, *J* = 7.9, 1.7 Hz, 1H), 7.78 (s, 1H), 7.69 (ddd, *J* = 8.6, 6.9, 1.7 Hz, 1H), 7.46 (d, *J* = 8.6 Hz, 1H), 7.35 (ddd, *J* = 7.9, 6.9, 1.0 Hz, 1H), 3.89 (s, 3H), 1.50 (s, 9H); <sup>13</sup>C NMR (126 MHz, CDCl<sub>3</sub>) δ 145.8, 143.2, 134.0, 133.7 (br), 131.6, 128.4 (br), 121.4, 114.6, 42.4, 34.9, 31.0; <sup>11</sup>B NMR (160 MHz, CDCl<sub>3</sub>) δ 44.4; HRMS (DART) calcd for C<sub>13</sub>H<sub>18</sub>BNCl ([M+H]<sup>+</sup>) 234.12153, found 234.12340.

### General Procedure for the Synthesis of Ligand L1 to L4:

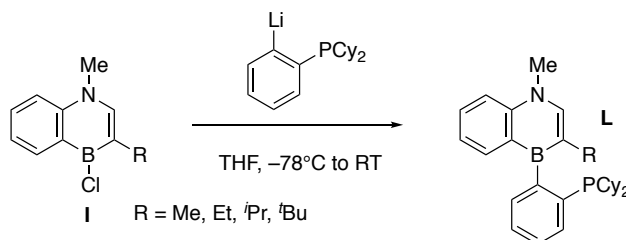

*N*-Me-*B*-Cl-1,4-Azaborines **I** where R = Me, Et, *i*Pr were synthesized according to previous literature.<sup>1</sup>

To a 100-mL round bottom flask charged with 2-bromophenyl dicyclohexylphosphine (706 mg, 2.00 mmol, 1.00 equiv.) and Et<sub>2</sub>O (15 mL) was added *n*-butyllithium (0.80 mL, 2.5 M in hexanes, 2.0 mmol, 1.0 equiv.) at -78 °C. After allowing the mixture to stir at -78 °C for an hour, the corresponding 1,4-azaborine **I** (2.0 mmol, 1.0 equiv.) in THF (3 mL) was added, and the resulting mixture was allowed to warm to room temperature in 2 hours. At the conclusion of reaction, all volatiles were removed under vacuum, and the crude residue was purified by silica gel chromatography under inert atmosphere using pentane/Et<sub>2</sub>O (20/1 to 10/1 gradient) as the eluent to afford the desired ligand as white solids.



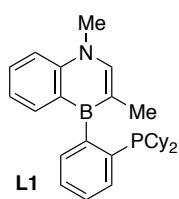

**L1**, 42% yield.  $^1\text{H}$  NMR (500 MHz,  $\text{CDCl}_3$ )  $\delta$  7.74 (dd,  $J = 7.8, 1.6$  Hz, 1H), 7.67 (s, 1H), 7.61 – 7.55 (m, 2H), 7.48 (d,  $J = 8.6$  Hz, 1H), 7.40 – 7.31 (m, 2H), 7.28 – 7.24 (m, 1H), 7.13 (ddd,  $J = 7.8, 6.8, 0.9$  Hz, 1H), 3.90 (s, 3H), 2.06 (d,  $J = 0.9$  Hz, 3H), 2.01 (ddd,  $J = 11.1, 5.1, 3.0$  Hz, 1H), 1.81 – 1.59 (m, 8H), 1.60 – 1.48 (m, 2H), 1.47 – 0.78 (m, 11H);  $^{13}\text{C}$  NMR (126 MHz,  $\text{CDCl}_3$ )  $\delta$  146.6, 143.2, 137.6, 137.3 (d,  $J = 11.0$  Hz), 131.7 (d,  $J = 15.4$  Hz), 131.7 (d,  $J = 2.6$  Hz), 130.8 (br), 130.4, 127.5, 125.6, 122.9 (br), 120.2, 114.3, 42.0, 35.1 (d,  $J = 13.7$  Hz), 33.6 (d,  $J = 12.4$  Hz), 30.7 (d,  $J = 14.2$  Hz), 30.3 (d,  $J = 15.9$  Hz), 30.0 (d,  $J = 10.6$  Hz), 29.2 (d,  $J = 6.0$  Hz), 27.7, 27.6 (d,  $J = 6.4$  Hz), 27.6, 27.5 (d,  $J = 3.6$  Hz), 26.7, 26.6, 19.6 (d,  $J = 4.3$  Hz) (one signal of aromatic carbon attached to boron is not observed);  $^{11}\text{B}$  NMR (160 MHz,  $\text{CDCl}_3$ )  $\delta$  47.3;  $^{31}\text{P}$  NMR (202 MHz,  $\text{CDCl}_3$ )  $\delta$  –3.2; IR (ATR) 3039, 2922, 2849, 1605, 1586, 1491, 1447, 1369, 1269, 1225, 1102, 908, 891, 764, 732, 647  $\text{cm}^{-1}$ ; HRMS (DART) calcd for  $\text{C}_{28}\text{H}_{38}\text{BNP}$  ( $[\text{M}+\text{H}]^+$ ) 430.28294, found 430.28290.

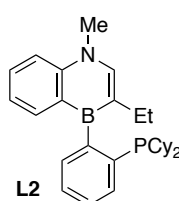

**L2**, 36% yield.  $^1\text{H}$  NMR (500 MHz,  $\text{CDCl}_3$ )  $\delta$  7.71 (dd,  $J = 7.8, 1.7$  Hz, 1H), 7.65 (s, 1H), 7.62 – 7.54 (m, 2H), 7.47 (d,  $J = 8.6$  Hz, 1H), 7.39 – 7.29 (m, 2H), 7.29 (dd,  $J = 5.5, 3.2$  Hz, 1H), 7.11 (t,  $J = 7.3$  Hz, 1H), 3.92 (s, 3H), 2.55 (dq,  $J = 14.8, 7.5$  Hz, 1H), 2.35 (dq,  $J = 14.7, 7.5$  Hz, 1H), 2.08 – 1.94 (m, 1H), 1.79 – 1.59 (m, 8H), 1.57 – 0.79 (m, 16H);  $^{13}\text{C}$  NMR (101 MHz,  $\text{CDCl}_3$ )  $\delta$  146.0, 143.2, 137.6, 137.2 (d,  $J = 11.0$  Hz), 132.2 (d,  $J = 15.4$  Hz), 131.7 (d,  $J = 2.5$  Hz), 130.5, 127.3, 125.6, 120.1, 114.3, 42.1, 35.3 (d,  $J = 13.8$  Hz), 33.5 (d,  $J = 12.3$  Hz), 30.7 (d,  $J = 14.0$  Hz), 30.3 (d,  $J = 15.9$  Hz), 30.0 (d,  $J = 11.3$  Hz), 29.1 (d,  $J = 5.7$  Hz), 27.7, 27.6 (d,  $J = 1.5$  Hz), 27.6 (d,  $J = 3.7$  Hz), 27.5 (d,  $J = 8.6$  Hz), 26.8, 26.6 (d,  $J = 4.3$  Hz), 26.6, 16.5 (three signals of aromatic carbons attached to boron are not observed);  $^{11}\text{B}$  NMR (160 MHz,  $\text{CDCl}_3$ )  $\delta$  47.1;  $^{31}\text{P}$  NMR (202 MHz,  $\text{CDCl}_3$ )  $\delta$  –3.6; IR (ATR) 3040, 2924, 2850, 1604, 1585, 1491, 1448, 1375, 1266, 1223, 1105, 912, 764, 750, 733, 663  $\text{cm}^{-1}$ ; HRMS (DART) calcd for  $\text{C}_{29}\text{H}_{40}\text{BNP}$  ( $[\text{M}+\text{H}]^+$ ) 444.29859, found 444.29726.

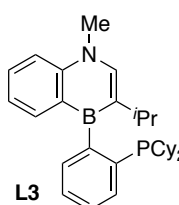

**L3**, 48% yield.  $^1\text{H}$  NMR (500 MHz,  $\text{CDCl}_3$ )  $\delta$  7.71 – 7.64 (m, 2H), 7.62 – 7.53 (m, 2H), 7.47 (d,  $J = 8.6$  Hz, 1H), 7.40 – 7.29 (m, 3H), 7.10 (t,  $J = 7.3$  Hz, 1H), 3.93 (s, 3H), 2.89 (hept,  $J = 7.2$  Hz, 1H), 1.96 (tt,  $J = 12.1, 3.5$  Hz, 1H), 1.80 – 1.59 (m, 8H), 1.56 (d,  $J = 9.0$  Hz, 3H), 1.43 (d,  $J = 13.2$  Hz, 1H), 1.34 – 0.79 (m, 15H);  $^{13}\text{C}$  NMR (126 MHz,  $\text{CDCl}_3$ )  $\delta$  144.3, 143.1, 137.7, 137.5 (d,  $J = 11.0$  Hz), 134.9 (br), 132.1 (d,  $J = 15.3$  Hz), 131.8 (d,  $J = 2.8$  Hz), 131.3 (br), 130.5, 127.3, 125.6, 120.1, 114.3, 42.4, 35.2 (d,  $J = 14.0$  Hz), 34.1 (d,  $J = 12.9$  Hz), 30.6 (d,  $J = 14.2$  Hz), 30.4 (d,  $J = 16.0$  Hz), 29.9 (d,  $J = 10.3$  Hz), 29.7 (d,  $J = 2.4$  Hz), 29.3 (d,  $J = 6.7$  Hz), 27.7, 27.6, 27.5, 27.5, 27.1, 26.7, 26.6, 22.7 (one signal of the aromatic carbon attached to boron is not observed);  $^{11}\text{B}$  NMR (160 MHz,  $\text{CDCl}_3$ )  $\delta$  47.5;  $^{31}\text{P}$  NMR (202 MHz,  $\text{CDCl}_3$ )  $\delta$  –4.3; IR (ATR) 3039, 2923, 2849, 1605, 1585, 1491, 1457, 1428, 1383, 1372, 1265, 1223, 908, 765, 750, 733, 667  $\text{cm}^{-1}$ ; HRMS (DART) calcd for  $\text{C}_{30}\text{H}_{42}\text{BNP}$  ( $[\text{M}+\text{H}]^+$ ) 458.31424, found 458.31565.

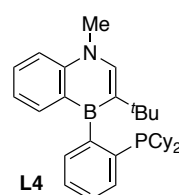

**L4**, 38% yield.  $^1\text{H}$  NMR (600 MHz,  $\text{CDCl}_3$ )  $\delta$  7.83 (s, 1H), 7.57 – 7.49 (m, 2H), 7.46 – 7.37 (m, 3H), 7.36 – 7.28 (m, 2H), 7.04 (ddd,  $J = 7.9, 6.8, 1.0$  Hz, 1H), 3.93 (s, 3H), 2.10 (tdd,  $J = 11.1, 6.7, 3.1$  Hz, 1H), 1.83 – 0.70 (m, 30H);  $^{13}\text{C}$  NMR (126 MHz,  $\text{CDCl}_3$ )  $\delta$  145.1, 142.1, 138.8 (d,  $J = 9.7$  Hz), 138.1, 132.2 (d,  $J = 14.9$  Hz), 131.2 (d,  $J = 2.3$  Hz), 130.5, 126.5, 125.2, 119.9, 113.8, 42.5, 36.0 (d,  $J = 14.7$  Hz), 35.9, 33.6 (d,  $J =$

14.1 Hz), 33.0 (d,  $J = 1.6$  Hz), 32.0 (d,  $J = 16.6$  Hz), 31.1 (d,  $J = 13.3$  Hz), 30.5 (d,  $J = 15.7$  Hz), 28.3 (d,  $J = 4.9$  Hz), 28.0 (d,  $J = 2.0$  Hz), 27.9 (d,  $J = 3.4$  Hz), 27.8, 27.4 (d,  $J = 10.1$  Hz), 26.7, 26.6 (three signals of aromatic carbon attached to boron are not observed);  $^{11}\text{B}$  NMR (160 MHz,  $\text{CDCl}_3$ )  $\delta$  47.3;  $^{31}\text{P}$  NMR (202 MHz,  $\text{CDCl}_3$ )  $\delta$  -3.4; IR (ATR) 3039, 2920, 2849, 1604, 1581, 1490, 1459, 1447, 1390, 1376, 1264, 1220, 1086, 918, 765, 742, 669  $\text{cm}^{-1}$ ; HRMS (DART) calcd for  $\text{C}_{31}\text{H}_{44}\text{BNP}$  ( $[\text{M}+\text{H}]^+$ ) 472.32989, found 472.32950.

## Synthesis of ligand CC-L1

### Reaction sequence:

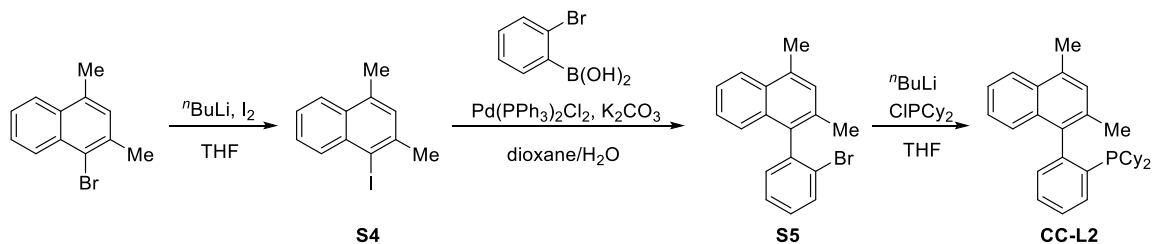

### Step 1:

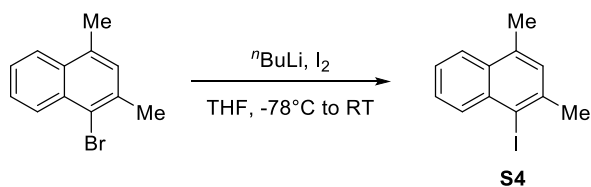

$n$ Butyllithium (1.30 mL, 2.50 M in hexanes, 3.24 mmol, 1.20 equiv.) was added in a dropwise fashion into a 20-mL vial charged with a solution 1-bromo-2,4-dimethylnaphthalene (634 mg, 2.70 mmol, 1.00 equiv., synthesized according to previous literature<sup>2</sup>.) in THF (12 mL) at  $-78$  °C. The resulting mixture was allowed to stir for 30 minutes at the same temperature. Then a solution of  $\text{I}_2$  (1.35 g, 5.40 mmol, 2.00 equiv.) in THF (3 mL) was added to the reaction mixture, and the resulting mixture was gradually allowed to warm to room temperature in 2 hours. At the conclusion of the reaction, THF was removed, and the residue was taken up in  $\text{Et}_2\text{O}$  (15 mL) and washed with saturated  $\text{Na}_2\text{S}_2\text{O}_3$  (10 mL) and  $\text{H}_2\text{O}$  (10 mL). The organic layer was then concentrated under reduced pressure, and the crude material was purified via silica gel chromatography using hexanes as the eluent to afford **S4** as a colorless liquid (88% yield).  $^1\text{H}$  NMR (500 MHz,  $\text{CDCl}_3$ )  $\delta$  8.33 – 8.24 (m, 1H), 7.92 (dd,  $J = 8.3, 1.6$  Hz, 1H), 7.58 (ddd,  $J = 8.4, 6.8, 1.3$  Hz, 1H), 7.52 (td,  $J = 6.8, 1.4$  Hz, 1H), 7.24 (s, 1H), 2.69 (s, 3H), 2.65 (d,  $J = 2.0$  Hz, 3H);  $^{13}\text{C}$  NMR (126 MHz,  $\text{CDCl}_3$ )  $\delta$  140.4, 135.0, 134.6, 132.9, 131.8, 129.2, 127.4, 125.7, 124.4, 103.3, 30.3, 19.2; IR (ATR) 3060, 3007, 2917, 1600, 1510, 1475, 1432, 1387, 1379, 1049, 1026, 875, 752, 731, 709, 669, 655, 453  $\text{cm}^{-1}$ ; HRMS (DART) calcd for  $\text{C}_{12}\text{H}_{11}\text{I}$  ( $[\text{M}]^+$ ) 281.98999, found 281.99087.

### Step 2:

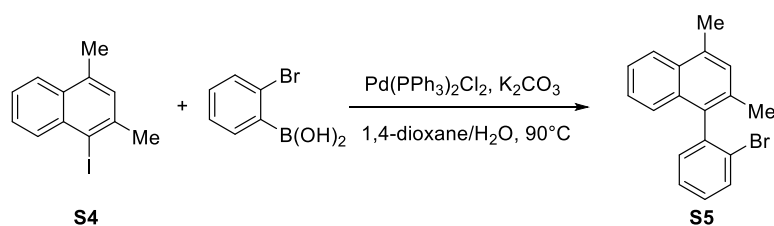

A 20-mL vial was charged with Pd(PPh<sub>3</sub>)<sub>2</sub>Cl<sub>2</sub> (16.5 mg, 0.0235 mmol, 0.0500 equiv.), potassium carbonate (130 mg, 0.940 mmol, 2.00 equiv.) and (2-bromophenyl)boronic acid (104 mg, 0.517 mmol, 1.10 equiv.) under nitrogen. To this mixture 1,4-dioxane (3.5 mL), H<sub>2</sub>O (0.5 mL) and **S4** (134 mg, 0.470 mmol, 1.00 equiv.) were added, and the reaction mixture was allowed to stir at 90 °C for 3 hours. At the conclusion of the reaction, Et<sub>2</sub>O (5 mL) and H<sub>2</sub>O (2 mL) were added to the mixture. The organic layer was separated and the aqueous layer was extracted with Et<sub>2</sub>O (10 mL). The combined organic layers were concentrated under reduced pressure. The resulting crude material was purified via silica gel chromatography using hexanes as the eluent to afford **S5** as a colorless liquid (68% yield).

<sup>1</sup>H NMR (500 MHz, CDCl<sub>3</sub>) δ 8.07 (dt, *J* = 8.5, 1.0 Hz, 1H), 7.81 (dd, *J* = 8.1, 1.3 Hz, 1H), 7.49 (dtd, *J* = 18.1, 7.1, 1.3 Hz, 2H), 7.41 (ddd, *J* = 8.2, 6.7, 1.3 Hz, 1H), 7.37 – 7.32 (m, 2H), 7.29 (td, *J* = 7.2, 1.4 Hz, 2H), 2.78 (d, *J* = 1.0 Hz, 3H), 2.22 (s, 3H); <sup>13</sup>C NMR (126 MHz, CDCl<sub>3</sub>) δ 140.9, 135.5, 134.2, 133.2, 132.9, 132.4, 132.1, 131.1, 129.5, 129.0, 127.6, 126.1, 125.9, 125.1, 124.9, 124.2, 20.3, 19.6; IR (ATR) 2967, 2943, 2913, 2856, 1599, 1555, 1503, 1438, 1326, 1263, 1026, 961, 884, 867, 747, 639, 567, 417 cm<sup>-1</sup>; HRMS (DART) calcd for C<sub>18</sub>H<sub>16</sub>Br ([M+H]<sup>+</sup>) 311.04299, found 311.04305.

### Step 3:

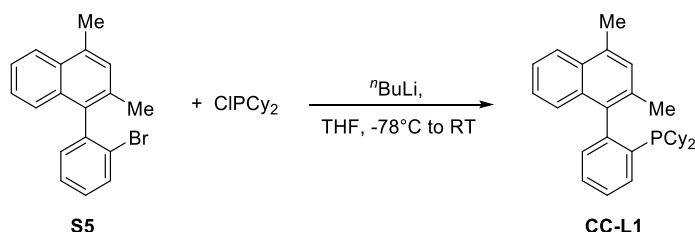

To a 20-mL vial charged with **S5** (99 mg, 0.32 mmol, 1.0 equiv.) and THF (2 mL) was added *n*-butyllithium (0.15 mL, 2.5 M in hexanes, 0.38 mmol, 1.2 equiv.) at –78 °C. The mixture was allowed to stir at –78 °C for 30 minutes, then a solution of chlorodicyclohexylphosphine (89 mg, 0.38 mmol, 1.2 equiv.) in THF (1 mL) was added. The resulting mixture was gradually allowed to warm to room temperature in 2 hours. THF was removed *in vacuo*, and the residue was purified via silica gel chromatography using hexanes/EtOAc (100/1) as the eluent to afford **CC-L1** as a white solid (72% yield).

<sup>1</sup>H NMR (500 MHz, CDCl<sub>3</sub>) δ 7.97 (d, *J* = 8.3 Hz, 1H), 7.67 (dt, *J* = 6.6, 2.3 Hz, 1H), 7.46 – 7.42 (m, 2H), 7.40 (ddd, *J* = 8.2, 6.5, 1.5 Hz, 1H), 7.30 – 7.17 (m, 4H), 2.72 (s, 3H), 2.18 (d, *J* = 2.0 Hz, 3H), 1.91 (ddd, *J* = 15.2, 10.1, 3.2 Hz, 1H), 1.78 – 0.79 (m, 21H); <sup>13</sup>C NMR (126 MHz, CDCl<sub>3</sub>) δ 147.5 (d, *J* = 31.1 Hz), 136.9 (d, *J* = 19.4 Hz), 136.7 (d, *J* = 6.2 Hz), 133.5 (d, *J* = 1.8 Hz), 133.4, 133.0 (d, *J* = 3.2 Hz), 132.7 (d, *J* = 2.0 Hz), 131.6 (d, *J* = 5.9 Hz), 131.0, 129.5, 128.6, 127.7, 126.6, 124.8, 124.4, 124.0, 34.9 (d, *J* = 15.1 Hz), 33.7 (d, *J* = 14.1 Hz), 30.4 (d, *J* = 4.8 Hz), 30.2, 30.1 (d, *J* = 11.9 Hz), 29.8 (d, *J* = 12.9 Hz), 27.6, 27.6 (d, *J* = 18.5 Hz), 27.5 (d, *J* = 4.0 Hz), 27.4 (d, *J* = 6.2 Hz), 26.7, 26.5, 21.4 (d, *J* = 4.3 Hz), 19.7; <sup>31</sup>P NMR (202 MHz, CDCl<sub>3</sub>) δ –9.4; IR (ATR) 3051, 3006, 2921, 2848, 1600, 1511, 1446, 1386, 1034, 1000, 909, 875, 851, 757, 733, 669 cm<sup>-1</sup>; HRMS (DART) calcd for C<sub>30</sub>H<sub>38</sub>P ([M+H]<sup>+</sup>) 429.27056, found 429.26989.

## Procedure for *trans*-Selective Cyanoboration, Ligand Screening (Table 1)

To a 4-mL vial charged with Pd(COD)(CH<sub>2</sub>TMS)<sub>2</sub> (3.9 mg, 0.010 mmol, 5.0 mol %), corresponding ligand in **Table 1** (0.010 mmol, 5.0 mol %), CuCN (29 mg, 0.32 mmol, 1.6 equiv.), BCatCl (55 mg, 0.36 mmol, 1.8 equiv.), and *o*-DCB (0.30 mL) was added enyne **1a** (28.4 mg, 0.200 mmol, 1.00 equiv) and a solution of hexamethylbenzene in *o*-DCB (5.0 μL, 3.3 M) as the internal standard. The resulting mixture was allowed to stir for 2.5 hours at 115 °C. At the conclusion of the reaction, the mixture was passed through an acrodisc under an inert atmosphere using CH<sub>2</sub>Cl<sub>2</sub> as the solvent, and 1,8-diaminonaphthlene (64 mg, 0.40 mmol, 2.0 equiv) was added to the filtrate. After allowing the mixture to stir for 12 hours, volatiles were removed under reduced pressure, and the *trans*:*cis* ratios and yields were determined by <sup>1</sup>H NMR of the resulting crude material against hexamethylbenzene as the internal standard.

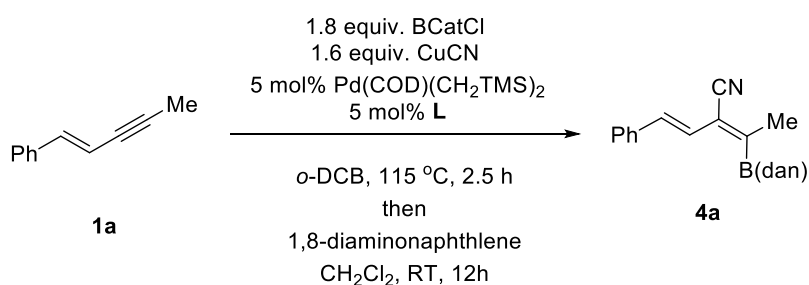

| entry | L                  | <b>4a</b> yield ( <i>trans</i> : <i>cis</i> ) |
|-------|--------------------|-----------------------------------------------|
| 1     | none               | 3% (89:11)                                    |
| 2     | PhPCy <sub>2</sub> | 13% (95:5)                                    |
| 3     | XPhos              | 10% (90:10)                                   |
| 4     | dppe               | 0.3% (ND)                                     |
| 5     | <b>L1</b>          | <b>92% (96:4)</b>                             |
| 6     | <b>L2</b>          | 69% (95:5)                                    |
| 7     | <b>L3</b>          | 48% (95:5)                                    |
| 8     | <b>L4</b>          | 24% (95:5)                                    |
| 9     | <b>L5</b>          | 46% (96:4)                                    |
| 10    | <b>CC-L1</b>       | 6% (89:11)                                    |

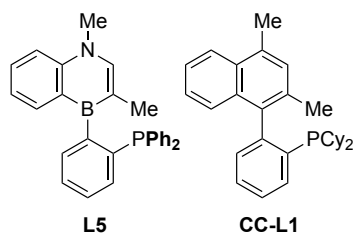

*o*-DCB: *ortho*-dichlorobenzene

## Preparation of Enynes **1** and **2** (Table 2 and Table 3)

### Enynes in Table 2

#### General Method for Enyne Synthesis by Kumada Coupling:

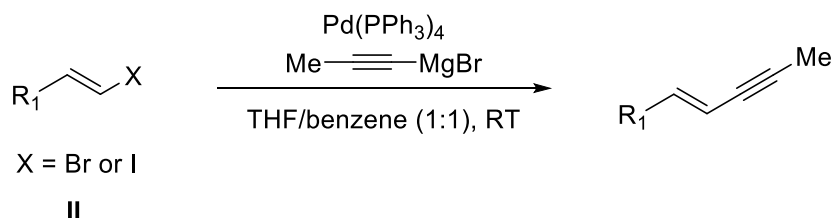

The corresponding (*E*)-styrenyl bromide<sup>3,4</sup> (to synthesize **1a-1b**, **1d-1h**, **1k**, **1m** and **1s**) or alkenyl iodide<sup>5,6,7</sup> (to synthesize **1n-1q** and **1t**) precursors are known compounds. (*E*)-3-(2-bromovinyl) thiophene was obtained using reported methods.<sup>8,9</sup>

To a 20-mL vial charged with Pd(PPh<sub>3</sub>)<sub>4</sub> (34 mg, 0.030 mmol, 0.015 equiv.), (*E*)-styrenyl bromide or alkenyl iodide **II** (2.0 mmol, 1.0 equiv.) and benzene (5 mL) was added 1-propynyl magnesium bromide (5.2 mL, 0.50 M in THF, 2.6 mmol, 1.3 equiv.) in a dropwise fashion at room temperature under nitrogen. The mixture was allowed to stir for 14 hours at the same temperature. At the conclusion of reaction, aqueous HCl solution (5.0 mL, 1.0 M) was added slowly along with Et<sub>2</sub>O (6 mL). The organic layer was separated, and the aqueous layer was further extracted with Et<sub>2</sub>O (5 mL). The organic layers were then combined, and dried with Na<sub>2</sub>SO<sub>4</sub>. All volatiles were removed *in vacuo*, and the residue was purified by silica gel chromatography using hexanes as the eluent to afford the internal enynes as colorless oils. Enyne **1s** and **1t** were synthesized with the same procedure using 1-butynyl magnesium bromide and 1-ethynyl magnesium bromide, respectively. The characterization data for enynes are consistent with those reported in the literature: **1a**<sup>10</sup>, (**1d**, **1e**, **1g**, **1h**, **1n**, **1p**, **1s**)<sup>1</sup>, **1t**<sup>11</sup>.

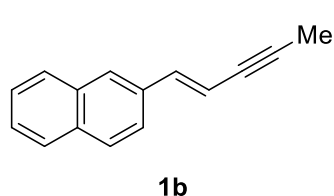

**1b**, 87% yield. <sup>1</sup>H NMR (600 MHz, CDCl<sub>3</sub>) δ 7.86 – 7.76 (m, 3H), 7.73 (d, *J* = 1.6 Hz, 1H), 7.58 (dd, *J* = 8.6, 1.7 Hz, 1H), 7.52 – 7.42 (m, 2H), 7.06 (d, *J* = 16.1 Hz, 1H), 6.29 (dq, *J* = 16.2, 2.4, Hz, 1H), 2.07 (d, *J* = 2.4 Hz, 3H); <sup>13</sup>C NMR (151 MHz, CDCl<sub>3</sub>) δ 140.3, 134.1, 133.6, 133.4, 128.4, 128.2, 127.8, 126.5, 126.5, 126.3, 122.9, 109.3, 88.8, 79.2, 4.7; IR (ATR) 3055, 3029, 2912, 2850, 2216, 1507, 1362, 1185, 959, 867, 828, 816, 740, 486 cm<sup>-1</sup>; HRMS (DART) calcd for C<sub>15</sub>H<sub>13</sub> ([M+H]<sup>+</sup>) 193.10118, found 193.10037.

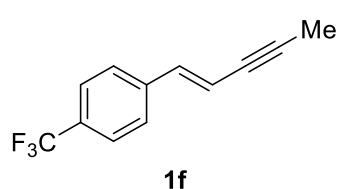

**1f**, 66% yield. <sup>1</sup>H NMR (500 MHz, CDCl<sub>3</sub>) δ 7.56 (d, *J* = 8.2 Hz, 2H), 7.44 (d, *J* = 8.2 Hz, 2H), 6.87 (d, *J* = 16.2 Hz, 1H), 6.22 (dq, *J* = 16.2, 2.4 Hz, 1H), 2.03 (dd, *J* = 2.5, 0.8 Hz, 3H); <sup>13</sup>C NMR (126 MHz, CDCl<sub>3</sub>) δ 140.1 (d, *J* = 1.7 Hz), 138.5, 130.0 (d, *J* = 32.5 Hz), 126.3, 125.7 (q, *J* = 3.8 Hz), 124.2 (q, *J* = 271.9 Hz), 111.8, 90.2, 78.7, 4.6; <sup>19</sup>F NMR (470 MHz, CDCl<sub>3</sub>) δ -62.6; IR (ATR) 3020, 2924, 2854, 2217, 1612, 1411, 1327, 1165, 1120, 1109, 1070, 954, 860, 820, 599, 517 cm<sup>-1</sup>; HRMS (DART) calcd for C<sub>12</sub>H<sub>10</sub>F<sub>3</sub> ([M+H]<sup>+</sup>) 211.07291, found 211.07317.

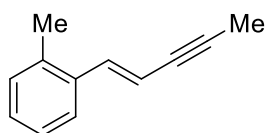

**1k**

**1k**, 71% yield.  $^1\text{H NMR}$  (600 MHz,  $\text{CDCl}_3$ )  $\delta$  7.47 (dd,  $J = 7.0, 2.1$  Hz, 1H), 7.23 – 7.13 (m, 4H), 6.09 (dq,  $J = 16.1, 2.4$  Hz, 1H), 2.39 (s, 3H), 2.06 (d,  $J = 2.4$  Hz, 3H);  $^{13}\text{C NMR}$  (151 MHz,  $\text{CDCl}_3$ )  $\delta$  138.0, 135.6, 135.6, 130.5, 128.2, 126.2, 124.9, 109.9, 88.0, 79.4, 19.8, 4.6; IR (ATR) 3014, 3019, 2949, 2913, 2849, 2217, 1482, 1458, 1436, 1377, 1048, 951, 746, 714, 608, 537, 458  $\text{cm}^{-1}$ ; HRMS (DART) calcd for  $\text{C}_{12}\text{H}_{13}$  ( $[\text{M}+\text{H}]^+$ ) 157.10118, found 157.10142.

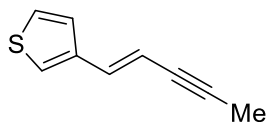

**1m**

**1m**, 83% yield.  $^1\text{H NMR}$  (500 MHz,  $\text{CDCl}_3$ )  $\delta$  7.28 – 7.25 (m, 1H), 7.20 – 7.14 (m, 2H), 6.86 (d,  $J = 16.1$  Hz, 1H), 5.97 (dq,  $J = 16.2, 2.4$  Hz, 1H), 2.00 (d,  $J = 2.4$  Hz, 3H);  $^{13}\text{C NMR}$  (126 MHz,  $\text{CDCl}_3$ )  $\delta$  139.5, 134.3, 126.4, 124.5, 122.9, 108.8, 88.3, 78.9, 4.7; IR (ATR) 3097, 3033, 2912, 2847, 2218, 1411, 1244, 1183, 947, 865, 834, 766, 623, 687, 472  $\text{cm}^{-1}$ ; HRMS (DART) calcd for  $\text{C}_9\text{H}_9\text{S}$  ( $[\text{M}+\text{H}]^+$ ) 149.04195, found 149.04177.

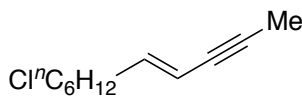

**1o**

**1o**, 87% yield.  $^1\text{H NMR}$  (500 MHz,  $\text{CDCl}_3$ )  $\delta$  6.07 – 5.96 (m, 1H), 5.41 (dq,  $J = 15.8, 1.9$  Hz, 1H), 3.51 (t,  $J = 6.7$  Hz, 2H), 2.07 (qd,  $J = 7.3, 1.5$  Hz, 2H), 1.91 (d,  $J = 2.3$  Hz, 3H), 1.75 (dt,  $J = 14.7, 6.8$  Hz, 2H), 1.48 – 1.19 (m, 6H);  $^{13}\text{C NMR}$  (126 MHz,  $\text{CDCl}_3$ )  $\delta$  143.1, 110.2, 84.2, 78.5, 45.2, 32.9, 32.7, 28.8, 28.4, 26.8, 4.3; IR (ATR) 3019, 2929, 2855, 2225, 1462, 1444, 1309, 1172, 955, 727, 651  $\text{cm}^{-1}$ ; HRMS (DART) calcd for  $\text{C}_{11}\text{H}_{18}\text{Cl}$  ( $[\text{M}+\text{H}]^+$ ) 185.10915, found 185.10880.

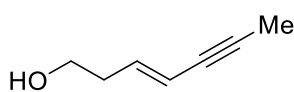

**1q**

**1q**, with 2.6 equiv. 1-propynyl magnesium bromide, 81% yield.  $^1\text{H NMR}$  (500 MHz,  $\text{CDCl}_3$ )  $\delta$  5.99 (dtd,  $J = 15.5, 7.3, 0.7$  Hz, 1H), 5.60 – 5.42 (m, 1H), 3.63 (t,  $J = 6.4$  Hz, 2H), 2.32 (qd,  $J = 6.5, 1.4$  Hz, 2H), 1.94 – 1.87 (m, 3H), 1.85 (s, br, 1H);  $^{13}\text{C NMR}$  (126 MHz,  $\text{CDCl}_3$ )  $\delta$  138.8, 112.9, 85.1, 78.1, 61.7, 36.3, 4.2; IR (ATR) 3330, 2917, 2879, 2224, 1428, 1376, 1171, 1043, 954, 636, 543  $\text{cm}^{-1}$ ; HRMS (DART) calcd for  $\text{C}_7\text{H}_{11}\text{O}$  ( $[\text{M}+\text{H}]^+$ ) 111.08044, found 111.08026.

#### General Method for Enyne Synthesis by Terminal Enyne Methylation:

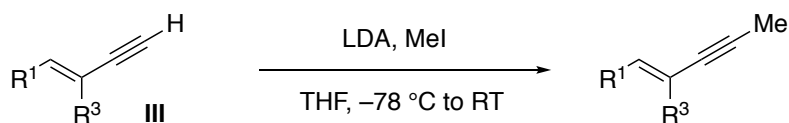

Terminal enynes precursors **III** for synthesizing **1c**, **1i** and **1l** are known compounds.<sup>12,13</sup>

To a 20-mL vial charged with diisopropylamine (242 mg, 2.40 mmol, 1.20 equiv.) and THF (6 mL), *n*-butyl lithium (0.88 mL, 2.5 M in hexanes, 2.2 mmol, 1.1 equiv.) was added in dropwise fashion at  $-78$  °C. The mixture was allowed to stir at the same temperature for 15 minutes. Then the terminal enyne (2.0 mmol, 1.0 equiv.) in THF (2.0 mL) was added to the LDA solution at  $-78$  °C. After allowing the mixture to stir at  $-78$  °C for another 20 minutes, MeI (355 mg, 2.50 mmol, 1.25 equiv.) was added at once. The resulting mixture was allowed to stir at  $-78$  °C for 30 min and then gradually allowed to warm to room temperature in an hour. At the conclusion of the reaction, THF was removed *in vacuo*, and the residue was dissolved in  $\text{Et}_2\text{O}$  (10 mL). The organic layer was further washed by  $\text{H}_2\text{O}$  (5 mL), brine (5 mL) and concentrated. The residue was purified by silica gel column chromatography using hexanes as the eluent to afford the internal enynes as colorless oils.

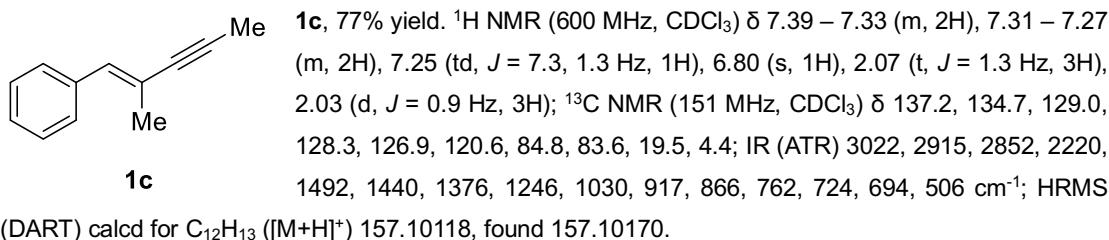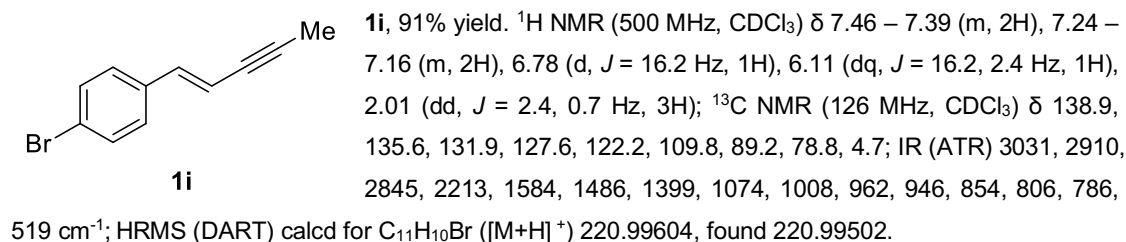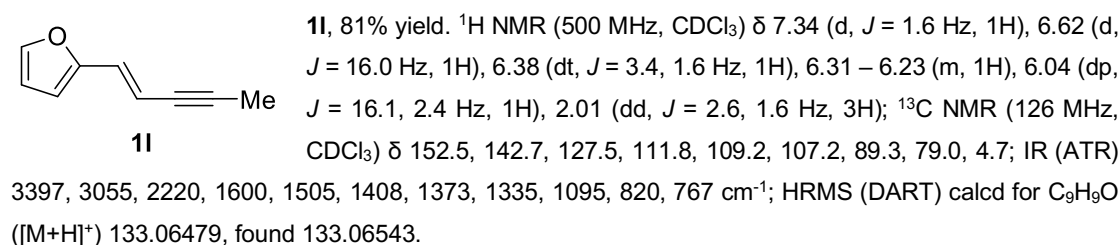

#### Synthesis of Enyne **1j** by Esterification:

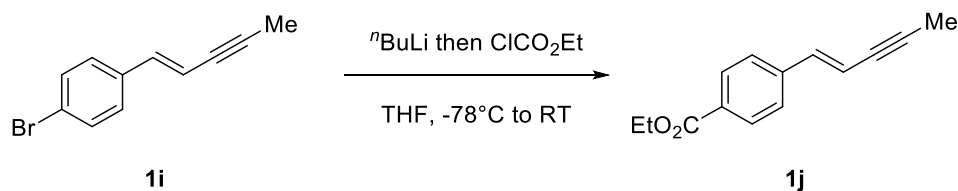

A solution of enyne **1i** (236 mg, 1.14 mmol, 1.00 equiv.) in THF (4 mL) was placed in a 20-mL vial. *n*-Butyl lithium (0.500 mL, 2.50 M in hexanes, 1.25 mmol, 1.10 equiv.) was added to this solution in a dropwise fashion at –78 °C. After allowing the mixture to stir at the same temperature for 20 minutes, ethyl chloroformate (186 mg, 1.71 mmol, 1.50 equiv.) was added. The mixture was allowed to stir for an hour at –78 °C and then allowed to warm to room temperature in an hour. The resulting slurry was poured into H<sub>2</sub>O (10 mL) and then diluted with Et<sub>2</sub>O (5 mL). The organic layer was separated and volatiles were removed *in vacuo*. The resulting residue was purified by silica gel chromatography using hexanes/EtOAc (20/1) as the eluent to afford **1j** a white solid (47%).

<sup>1</sup>H NMR (600 MHz, CDCl<sub>3</sub>) δ 8.03 – 7.86 (m, 2H), 7.48 – 7.30 (m, 2H), 6.85 (d, *J* = 16.2 Hz, 1H), 6.21 (dq, *J* = 16.3, 2.4 Hz, 1H), 4.35 (q, *J* = 7.2 Hz, 2H), 2.08 – 1.89 (m, 3H), 1.37 (t, *J* = 7.1 Hz, 3H); <sup>13</sup>C NMR (151 MHz, CDCl<sub>3</sub>) δ 166.3, 140.8, 139.0, 130.0, 129.9, 125.9, 111.6, 90.1, 78.8, 61.0, 14.4, 4.6; IR (ATR) 3035, 2983, 2912, 2212, 1711, 1607, 1411, 1363, 1279, 1266, 1178, 1127, 1105, 1026, 944, 864, 759, 694, 519 cm<sup>-1</sup>; HRMS (DART) calcd for C<sub>14</sub>H<sub>15</sub>O<sub>2</sub> ([M+H]<sup>+</sup>) 215.10666, found 215.10591.

### Synthesis of Enyne **1r** by Ester Coupling:

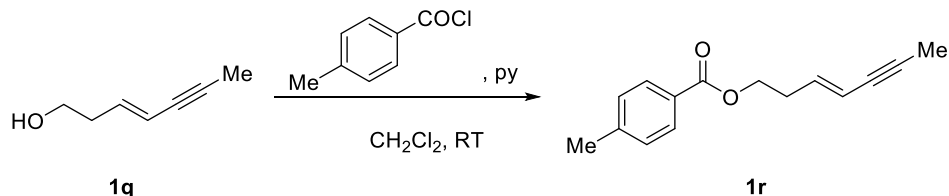

Under nitrogen, *p*-toluoyl chloride (240 mg, 1.56 mmol, 1.20 equiv.) and pyridine (123 mg, 1.56 mmol, 1.20 equiv.) were added to a 20-mL vial charged with a solution of enyne **1q** (143 mg, 1.30 mmol, 1.00 equiv.) in CH<sub>2</sub>Cl<sub>2</sub> (8 mL). The resulting mixture was allowed to stir at room temperature for 14 hours. Then, the solvent was removed under reduced pressure, and the residue was purified by silica gel chromatography with hexans/EtOAc (40/1) as the eluent to afford **1r** as a white solid (68%).

<sup>1</sup>H NMR (500 MHz, CDCl<sub>3</sub>) δ 7.98 – 7.80 (m, 2H), 7.23 (d, *J* = 8.2 Hz, 2H), 6.08 (dt, *J* = 15.8, 7.1 Hz, 1H), 5.58 (dp, *J* = 15.8, 1.9 Hz, 1H), 4.32 (t, *J* = 6.6 Hz, 2H), 2.54 (qd, *J* = 6.8, 1.5 Hz, 2H), 2.40 (s, 3H), 1.92 (d, *J* = 2.3 Hz, 3H); <sup>13</sup>C NMR (126 MHz, CDCl<sub>3</sub>) δ 166.6, 143.7, 138.0, 129.7, 129.1, 127.6, 112.8, 85.3, 78.1, 63.6, 32.4, 21.7, 4.3; IR (ATR) 2955, 2916, 2226, 1715, 1612, 1454, 1379, 1271, 1177, 1105, 1020, 955, 841, 753, 691 cm<sup>-1</sup>; HRMS (DART) calcd for C<sub>15</sub>H<sub>17</sub>O<sub>2</sub> ([M+H]<sup>+</sup>) 229.12231, found 229.12131.

### Enynes in Table 3

#### General Method for Enyne Synthesis by Sonogashira Coupling:

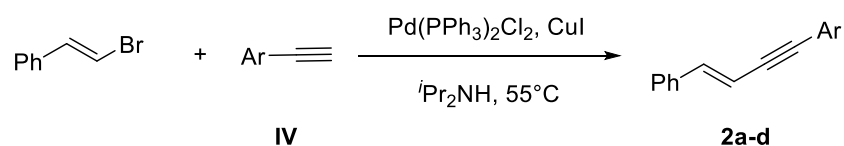

A 50-mL round bottom flask was charged with PdCl<sub>2</sub>(PPh<sub>3</sub>)<sub>2</sub> (84 mg, 0.12 mmol, 0.030 equiv.) and CuI (38 mg, 0.20 mol, 0.050 equiv.) under nitrogen. To this flask *i*Pr<sub>2</sub>NH (20 mL), (*E*)-styrenyl bromide (0.73 g, 4.0 mmol, 1.0 equiv.) and the corresponding terminal alkyne **IV** (4.8 mmol, 1.2 equiv.) were added. The mixture was allowed to stir at 55 °C for 16 h. At the conclusion of the reaction, H<sub>2</sub>O (15 mL) and Et<sub>2</sub>O (15 mL) were added to the reaction mixture, and the organic layer was separated. The aqueous layer was extracted with another portion of Et<sub>2</sub>O (10 mL). The organic layers were combined, dried, and concentrated. The resulting crude residue was purified by silica gel chromatography using hexanes as the eluent to obtain the product as white solids. Characterization data of enyne **2a** to **2c** are consistent with reported in the literature.<sup>14</sup>

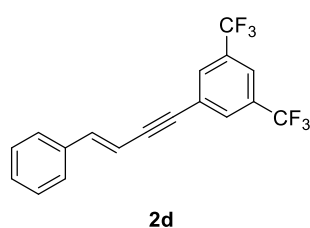

**2d**, 76% yield. <sup>1</sup>H NMR (600 MHz, CDCl<sub>3</sub>) δ 7.91 (d, *J* = 1.7 Hz, 2H), 7.83 (s, 1H), 7.52 – 7.44 (m, 2H), 7.44 – 7.33 (m, 3H), 7.17 (d, *J* = 16.3 Hz, 1H), 6.41 (d, *J* = 16.2 Hz, 1H); <sup>13</sup>C NMR (151 MHz, CDCl<sub>3</sub>) δ 143.6, 135.9, 132.1 (q, *J* = 33.8 Hz), 131.4 (q, *J* = 4.0 Hz), 129.4, 129.0, 126.7, 126.0, 123.2 (q, *J* = 272.8 Hz), 121.5 (dq, *J* = 7.7, 3.9 Hz), 106.9, 92.6, 88.6; <sup>19</sup>F NMR (564 MHz, CDCl<sub>3</sub>) δ –65.8; IR (ATR) 3033, 2201, 1464, 1385, 1277, 1244, 1174, 1132, 1107, 1048, 953, 896, 848, 748, 684 cm<sup>-1</sup>; HRMS (DART) calcd for C<sub>18</sub>H<sub>11</sub>F<sub>6</sub> ([M+H]<sup>+</sup>) 341.07595, found 341.07569.



General Method for Enyne Synthesis by Kumada Coupling:

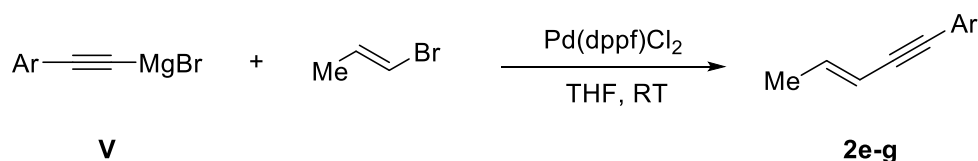

The protocol for was adapted from literature procedure.<sup>15</sup> Under nitrogen to a 20-mL vial charged with Pd(dppf)Cl<sub>2</sub> (44 mg, 0.060 mmol, 0.020 equiv.) and (*E*)-1-bromopropene (436 mg, 3.60 mmol, 1.20 equiv.) was added alkynyl magnesium bromide **V** (3.0 mmol, 1.0 equiv.) in THF (12 mL) at room temperature. The mixture was allowed to stir for another 14 hours at room temperature. Then the solvent was removed *in vacuo*, and the residue was dissolved in Et<sub>2</sub>O (10 mL). This organic solution was further washed by H<sub>2</sub>O (10 mL) and brine (10 mL) and dried with Na<sub>2</sub>SO<sub>4</sub>. Volatiles were removed under reduced pressure, and the resulting crude residue was purified by silica gel column chromatography using hexane as the eluent to afford the product as colorless liquids.

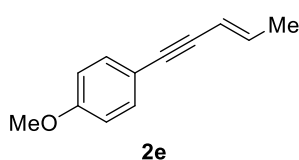

**2e**, with 1-bromopropene mixture (4.6 equiv., *E/Z* = 26:74). Crude <sup>1</sup>H NMR indicates the ratio of *E/Z* enyne is 95:5. Purification provides pure **2e**, 56% yield. <sup>1</sup>H NMR (500 MHz, CDCl<sub>3</sub>) δ 7.40 – 7.31 (m, 2H), 6.87 – 6.76 (m, 2H), 6.21 (dd, *J* = 15.8, 6.8 Hz, 1H), 5.70 (dq, *J* = 15.7, 1.8 Hz, 1H), 3.80 (s, 3H), 1.83 (dd, *J* = 6.8, 1.8 Hz, 3H); <sup>13</sup>C NMR (126 MHz, CDCl<sub>3</sub>) δ 159.4, 139.1, 132.9, 115.9, 114.0, 111.1, 87.7, 87.0, 55.4, 18.8; IR (ATR) 3001, 2959, 2934, 2912, 2837, 1603, 1506, 1441, 1286, 1244, 1171, 1036, 950, 828, 803, 533 cm<sup>-1</sup>; HRMS (DART) calcd for C<sub>12</sub>H<sub>13</sub>O ([M+H]<sup>+</sup>) 173.09609, found 173.09544.

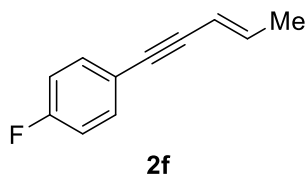

**2f**, 74% yield. <sup>1</sup>H NMR (500 MHz, CDCl<sub>3</sub>) δ 7.43 – 7.34 (m, 2H), 7.07 – 6.90 (m, 2H), 6.24 (dq, *J* = 14.8, 6.8, 1.2 Hz, 1H), 5.69 (dp, *J* = 15.8, 1.8 Hz, 1H), 1.84 (dt, *J* = 6.9, 1.5 Hz, 3H); <sup>13</sup>C NMR (126 MHz, CDCl<sub>3</sub>) δ 162.4 (d, *J* = 248.9 Hz), 140.1, 133.4 (d, *J* = 8.2 Hz), 119.9 (d, *J* = 3.4 Hz), 115.7 (d, *J* = 22.0 Hz), 110.8, 88.0 (d, *J* = 1.4 Hz), 86.7, 18.9; <sup>19</sup>F NMR (470 MHz, CDCl<sub>3</sub>) δ -111.7 (dp, *J* = 13.6, 4.8 Hz); IR (ATR) 2914, 1599, 1504, 1229, 1155, 1092, 950, 909, 831, 678, 527, 503 cm<sup>-1</sup>; HRMS (DART) calcd for C<sub>11</sub>H<sub>10</sub>F ([M+H]<sup>+</sup>) 161.07610, found 161.07598.

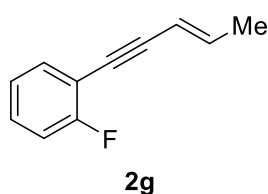

**2g**, 80% yield. <sup>1</sup>H NMR (500 MHz, CDCl<sub>3</sub>) δ 7.41 (td, *J* = 7.5, 1.8 Hz, 1H), 7.26 (dddd, *J* = 8.1, 7.2, 5.2, 1.8 Hz, 1H), 7.15 – 6.98 (m, 2H), 6.31 (dq, *J* = 15.7, 6.8 Hz, 1H), 5.75 (dq, *J* = 15.8, 1.8 Hz, 1H), 1.85 (dd, *J* = 6.9, 1.9 Hz, 3H); <sup>13</sup>C NMR (126 MHz, CDCl<sub>3</sub>) δ 162.6 (d, *J* = 250.9 Hz), 140.8, 133.4 (d, *J* = 1.4 Hz), 129.6 (d, *J* = 8.0 Hz), 124.0 (d, *J* = 3.8 Hz), 115.5 (d, *J* = 21.1 Hz), 112.4 (d, *J* = 15.8 Hz), 110.7, 93.5 (d, *J* = 3.3 Hz), 81.1, 18.9 (d, *J* = 2.2 Hz); <sup>19</sup>F NMR (470 MHz, CDCl<sub>3</sub>) δ -110.4 (dt, *J* = 8.7, 6.0 Hz); IR (ATR) 3031, 2914, 2207, 1572, 1491, 1447, 1256, 1218, 1106, 951, 912, 823, 754, 577 cm<sup>-1</sup>; HRMS (DART) calcd for C<sub>11</sub>H<sub>10</sub>F ([M+H]<sup>+</sup>) 161.07610, found 161.07542.

#### Synthesis of Enyne **2h** by Negishi Coupling:

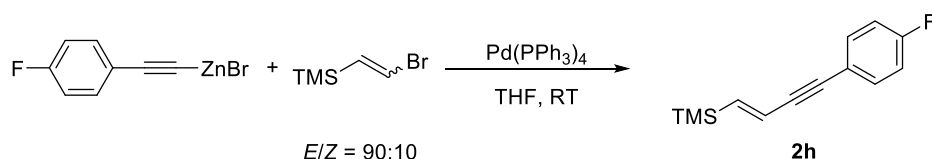

The protocol was adapted from literature procedure.<sup>16</sup> Under nitrogen to a 20-mL vial charged with Pd(PPh<sub>3</sub>)<sub>4</sub> (92 mg, 0.080 mmol, 0.020 equiv.) was added a solution of ((4-fluorophenyl)ethynyl)zinc bromide (3.42 mmol, 0.850 equiv.) in THF (15 mL) followed by (2-bromovinyl)trimethylsilane (716 mg, 4.00 mmol, 1.00 equiv., *E/Z* = 90/10) at room temperature. The resulting mixture was allowed to stir for 14 hours at room temperature. Then the solvent was removed *in vacuo* and the residue was dissolved in Et<sub>2</sub>O (10 mL). This organic solution was further washed by H<sub>2</sub>O (10 mL) and concentrated. The crude product was carefully purified by silica gel chromatography using hexanes as the eluent to afford **2h** as a colorless liquid (57% yield).

<sup>1</sup>H NMR (500 MHz, CDCl<sub>3</sub>) δ 7.46 – 7.36 (m, 2H), 7.01 (t, *J* = 8.7 Hz, 2H), 6.54 (d, *J* = 19.2 Hz, 1H), 6.15 (d, *J* = 19.2 Hz, 1H), 0.13 (s, 9H); <sup>13</sup>C NMR (126 MHz, CDCl<sub>3</sub>) δ 162.6 (d, *J* = 249.6 Hz), 146.1, 133.6 (d, *J* = 8.2 Hz), 123.3, 119.6 (d, *J* = 3.6 Hz), 115.7 (d, *J* = 22.0 Hz), 89.5 (d, *J* = 1.5 Hz), 88.8, –1.5; <sup>19</sup>F NMR (470 MHz, CDCl<sub>3</sub>) δ –116.3 (m); IR (ATR) 2956, 1601, 1569, 1505, 1249, 1231, 1155, 975, 863, 833, 740, 727, 694, 658, 529 cm<sup>-1</sup>; HRMS (DART) calcd for C<sub>13</sub>H<sub>16</sub>FSi ([M+H]<sup>+</sup>) 219.09998, found 219.09980.

#### Synthesis of Enyne **2i** by Sonogashira Coupling:

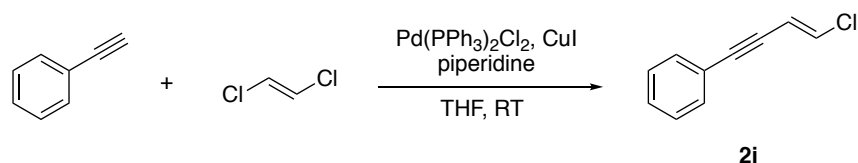

Under nitrogen a 50-mL round bottom flask was charged with PdCl<sub>2</sub>(PPh<sub>3</sub>)<sub>2</sub> (42 mg, 0.060 mmol, 0.020 equiv.) and CuI (23 mg, 0.12 mol, 0.040 equiv.). To this flask Et<sub>2</sub>O (6 mL), piperidine (1.02 g, 12.0 mmol, 4.00 equiv.), phenylacetylene (306 mg, 3.00 mmol, 1.00 equiv.) and *trans*-dichloroethylene (437 mg, 4.50 mmol, 1.50 equiv.) were added. The mixture was allowed to stir at room temperature for 16 h. At the conclusion of the reaction H<sub>2</sub>O (15 mL) and Et<sub>2</sub>O (15 mL) were added, and the organic layer was separated. The aqueous layer was further washed by Et<sub>2</sub>O (10 mL). The organic layers were combined, concentrated, and purified by silica gel chromatography using pentane as the eluent to obtain **2i** as a colorless liquid (87%).

<sup>1</sup>H NMR (500 MHz, CDCl<sub>3</sub>) δ 7.49 – 7.39 (m, 2H), 7.33 (dd, *J* = 5.0, 1.9 Hz, 3H), 6.63 (d, *J* = 13.6 Hz, 1H), 6.16 (d, *J* = 13.6 Hz, 1H); <sup>13</sup>C NMR (126 MHz, CDCl<sub>3</sub>) δ 131.7, 130.3, 128.8, 128.5, 122.8, 114.0, 92.1, 84.5; IR (ATR) 3067, 3031, 2204, 1581, 1488, 1442, 1272, 1224, 912, 843, 752, 687, 528, 498 cm<sup>-1</sup>; HRMS (DART) calcd for C<sub>10</sub>H<sub>7</sub>Cl ([M+H]<sup>+</sup>) 162.02308, found 162.02267.

## General Procedure for *trans*-Selective Cyanoboration Reaction of 1,3-Enynes (Table 2)

To a 4-mL vial charged with Pd(COD)(CH<sub>2</sub>TMS)<sub>2</sub> (3.9 mg, 0.010 mmol, 5.0 mol %), **L1** or **L5** (mol % is indicated in the corresponding entries), CuCN (29 mg, 0.32 mmol, 1.6 equiv), BCatCl (55 mg, 0.36 mmol, 1.8 equiv.), and *o*-DCB (0.30 mL) was added the corresponding enyne substrate (0.20 mmol, 1.0 equiv). The resulting mixture was allowed to stir for 2.5 hours at the temperature indicated in the entries. At the conclusion of reaction, the mixture was passed through an acrodisc with CH<sub>2</sub>Cl<sub>2</sub> under nitrogen. 1,8-Diaminonaphthlene (64 mg, 0.40 mmol, 2.0 equiv) was then added to the filtrate and the mixture was allowed to stir for another 12 hours. Then the mixture was passed through an acrodisc and concentrated under reduced pressure. The resulting crude residue was purified by silica gel chromatography using hexanes/CH<sub>2</sub>Cl<sub>2</sub> (4/1 to 1/1 gradient) as the eluent to afford the pure *trans*-selective cyanoboration products as yellow solids.

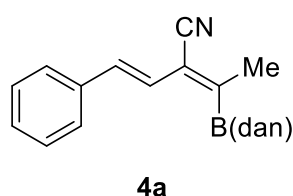

**4a**, with 5 mol % **L1** at 115 °C, 86% yield (run1: 87%, run2: 85%), 96:4. <sup>1</sup>H NMR (500 MHz, CDCl<sub>3</sub>) δ 7.40 (d, *J* = 7.0 Hz, 2H), 7.31 (t, *J* = 7.2 Hz, 2H), 7.27 (d, *J* = 7.0 Hz, 1H), 7.18 – 7.09 (m, 4H), 7.03 (d, *J* = 15.9 Hz, 1H), 6.93 (d, *J* = 15.8 Hz, 1H), 6.39 (dd, *J* = 7.1, 1.3 Hz, 2H), 5.70 (s, 2H), 2.33 (s, 3H); <sup>13</sup>C NMR (101 MHz, CDCl<sub>3</sub>) δ 140.1, 136.4, 135.8, 134.0, 129.0, 128.8, 127.8, 127.1, 123.9, 120.8, 120.1, 118.8, 115.6, 106.7, 22.5

(*B*-alkenyl carbon signal not observed); <sup>11</sup>B NMR (160 MHz, CDCl<sub>3</sub>) δ 28.8; IR (ATR) 3397, 3055, 2220, 1600, 1505, 1408, 1373, 1335, 1095, 820, 767 cm<sup>-1</sup>; HRMS (DART) calcd for C<sub>22</sub>H<sub>19</sub>BN<sub>3</sub> ([M+H]<sup>+</sup>) 336.16665, found 336.16979.

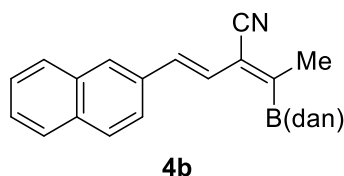

**4b**, with 5 mol % **L1** at 115 °C, 77% yield (run1: 75%, run2: 79%), 98:2. Crystals for single crystal X-ray diffraction analysis were obtained by recrystallization from hexane/CH<sub>2</sub>Cl<sub>2</sub> at room temperature. <sup>1</sup>H NMR (500 MHz, CDCl<sub>3</sub>) δ 7.77 (dt, *J* = 7.0, 2.6 Hz, 3H), 7.72 (d, *J* = 8.6 Hz, 1H), 7.53 (dd, *J* = 8.6, 1.7 Hz, 1H), 7.49 –

7.41 (m, 2H), 7.21 – 7.10 (m, 5H), 7.03 (d, *J* = 15.8 Hz, 1H), 6.41 (dd, *J* = 7.2, 1.3 Hz, 2H), 5.77 (s, 2H), 2.34 (s, 3H); <sup>13</sup>C NMR (126 MHz, CDCl<sub>3</sub>) δ 152.5 (br), 140.2, 136.4, 134.0, 133.6, 133.5, 133.3, 128.7, 128.4, 127.9, 127.8, 127.8, 126.6, 126.6, 124.1, 123.3, 120.8, 120.1, 118.8, 115.7, 106.7, 22.6; <sup>11</sup>B NMR (160 MHz, CDCl<sub>3</sub>) δ 28.9; IR (ATR) 3378, 3053, 2924, 2217, 1627, 1600, 1504, 1407, 1373, 1336, 1094, 953, 819, 765 cm<sup>-1</sup>; HRMS (DART) calcd for C<sub>26</sub>H<sub>21</sub>BN<sub>3</sub> ([M+H]<sup>+</sup>) 386.18230, found 386.18179.

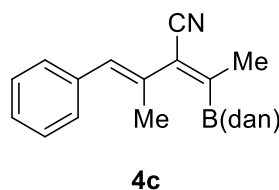

**4c**, with 5 mol % **L1** at 115 °C, 63% yield (run1: 65%, run2: 61%), >98:2. <sup>1</sup>H NMR (500 MHz, CDCl<sub>3</sub>) δ 7.32 (t, *J* = 7.5 Hz, 2H), 7.27 – 7.19 (m, 3H), 7.11 (t, *J* = 7.8 Hz, 2H), 7.05 (d, *J* = 8.2 Hz, 2H), 6.86 (s, 1H), 6.32 (d, *J* = 7.2 Hz, 2H), 5.68 (s, 2H), 2.31 (s, 3H), 2.16 (d, *J* = 1.4 Hz, 3H); <sup>13</sup>C NMR (126 MHz, CDCl<sub>3</sub>) δ 140.1, 136.5, 136.4, 133.0, 132.9, 129.2, 128.5, 127.7, 127.6, 125.4, 119.8, 118.6, 117.0, 106.5, 22.9, 18.1 (*B*-alkenyl

carbon signal not observed); <sup>11</sup>B NMR (160 MHz, CDCl<sub>3</sub>) δ 29.0; IR (ATR) 3396, 3054, 2925, 2211, 1599, 1504, 1373, 1332, 1109, 820, 765, 701 cm<sup>-1</sup>; HRMS (DART) calcd for C<sub>23</sub>H<sub>21</sub>BN<sub>3</sub> ([M+H]<sup>+</sup>) 350.18230, found 350.18304.

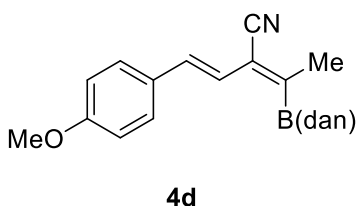

**4d**, with 1.5 equiv. BcatCl and 5 mol % **L1** at 115 °C, 64% yield (run1: 65%, run2: 62%), 96:4. <sup>1</sup>H NMR (600 MHz, CDCl<sub>3</sub>) δ 7.35 – 7.31 (m, 2H), 7.15 (dd, *J* = 8.3, 7.2 Hz, 2H), 7.11 (dd, *J* = 8.4, 1.1 Hz, 2H), 6.96 (d, *J* = 15.8 Hz, 1H), 6.86 – 6.82 (m, 2H), 6.80 (d, *J* = 15.8 Hz, 1H), 6.39 (dd, *J* = 7.2, 1.1 Hz, 2H), 5.73 (s, 2H), 3.79 (s, 3H), 2.31 (s, 3H); <sup>13</sup>C NMR (151 MHz, CDCl<sub>3</sub>) δ 160.2, 150.9 (br), 140.2, 136.4, 133.4, 128.6, 128.4, 127.8, 121.8, 120.9, 120.1, 118.7, 115.8, 114.4, 106.6, 55.4, 22.4; <sup>11</sup>B NMR (160 MHz, CDCl<sub>3</sub>) δ 28.8; IR (ATR) 3358, 3053, 2932, 2219, 1598, 1508, 1407, 1373, 1333, 1247, 1173, 1032, 1095, 820, 767 cm<sup>-1</sup>; HRMS (DART) calcd for C<sub>23</sub>H<sub>21</sub>BN<sub>3</sub>O ([M+H]<sup>+</sup>) 366.17722, found 366.17843.

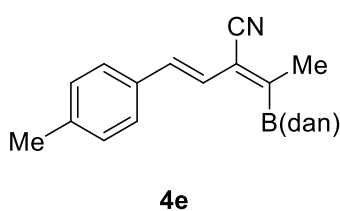

**4e**, with 5 mol % **L1** at 115 °C, 87% yield (run1: 88%, run2: 85%), 97:3. <sup>1</sup>H NMR (500 MHz, CDCl<sub>3</sub>) δ 7.32 – 7.28 (m, 2H), 7.15 (dd, *J* = 8.3, 7.1 Hz, 2H), 7.13 – 7.09 (m, 4H), 7.00 (d, *J* = 15.8 Hz, 1H), 6.88 (d, *J* = 15.8 Hz, 1H), 6.38 (dd, *J* = 7.1, 1.2 Hz, 2H), 5.70 (s, 2H), 2.33 (s, 3H), 2.32 (s, 3H); <sup>13</sup>C NMR (126 MHz, CDCl<sub>3</sub>) δ 140.2, 138.9, 136.4, 133.9, 133.1, 129.7, 127.8, 127.0, 122.9, 120.9, 120.1, 118.8, 115.7, 106.7, 22.4, 21.4 (*B*-alkenyl carbon signal not observed); <sup>11</sup>B NMR (160 MHz, CDCl<sub>3</sub>) δ 28.6; IR (ATR) 3396, 3052, 2917, 2220, 1629, 1600, 1505, 1408, 1373, 1334, 1095, 820, 766 cm<sup>-1</sup>; HRMS (DART) calcd for C<sub>23</sub>H<sub>21</sub>BN<sub>3</sub> ([M+H]<sup>+</sup>) 350.18230, found 350.18279.

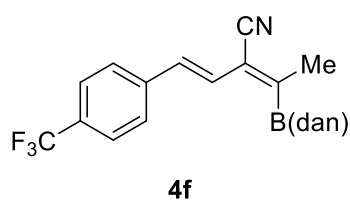

**4f**, with 5 mol % **L1** at 115 °C, 80% yield (run1: 77%, run2: 82%), >98:2. <sup>1</sup>H NMR (600 MHz, THF-*d*<sub>8</sub>) δ 7.65 (d, *J* = 8.2 Hz, 2H), 7.58 (d, *J* = 8.2 Hz, 2H), 7.48 (s, 2H), 7.21 (d, *J* = 15.9 Hz, 1H), 7.06 – 6.99 (m, 3H), 6.96 (dd, *J* = 8.4, 0.9 Hz, 2H), 6.37 (dd, *J* = 7.3, 1.0 Hz, 2H), 2.34 (s, 3H); <sup>13</sup>C NMR (126 MHz, THF-*d*<sub>8</sub>) δ 158.0 (br), 142.6, 141.2, 137.7, 131.6, 130.49 (q, *J* = 32.0 Hz), 128.6, 128.4, 128.2, 126.63 (q, *J* = 3.9 Hz), 125.5 (q, *J* = 272.2 Hz), 121.7, 120.2, 118.6, 115.8, 107.0, 22.9; <sup>11</sup>B NMR (160 MHz, THF-*d*<sub>8</sub>) δ 29.5; <sup>19</sup>F NMR (564 MHz, THF-*d*<sub>8</sub>) δ -63.4; IR (ATR) 3411, 3371, 2922, 2852, 2217, 1602, 1506, 1408, 1329, 1177, 1105, 1068, 820, 764, 690, 455 cm<sup>-1</sup>; HRMS (DART) calcd for C<sub>23</sub>H<sub>18</sub>BN<sub>3</sub>F<sub>3</sub> ([M+H]<sup>+</sup>) 404.15404, found 404.15382.

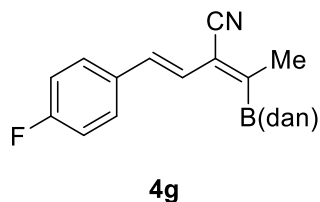

**4g**, with 5 mol % **L1** at 115 °C, 66% yield (run1: 66%, run2: 65%), 96:4. <sup>1</sup>H NMR (600 MHz, CDCl<sub>3</sub>) δ 7.35 (dd, *J* = 8.6, 5.5 Hz, 2H), 7.16 (t, *J* = 7.7 Hz, 2H), 7.12 (d, *J* = 8.2 Hz, 2H), 7.01 – 6.93 (m, 3H), 6.84 (d, *J* = 15.8 Hz, 1H), 6.40 (d, *J* = 7.2 Hz, 2H), 5.74 (s, 2H), 2.33 (s, 3H); <sup>13</sup>C NMR (151 MHz, CDCl<sub>3</sub>) δ 163.0 (d, *J* = 249.1 Hz), 152.7 (br), 140.1, 136.4, 132.6, 132.03 (d, *J* = 3.4 Hz), 128.7 (d, *J* = 8.1 Hz), 127.8, 123.63 (d, *J* = 2.6 Hz), 120.4, 120.1, 118.8, 116.0 (d, *J* = 21.9 Hz), 115.6, 106.7, 22.5; <sup>11</sup>B NMR (160 MHz, CDCl<sub>3</sub>) δ 28.7; <sup>19</sup>F NMR (564 MHz, CDCl<sub>3</sub>) δ -112.3 (tt, *J* = 8.6, 5.3 Hz); IR (ATR) 3404, 3385, 3052, 2216, 1601, 1505, 1407, 1376, 1334, 1227, 1092, 819, 763, 681 cm<sup>-1</sup>; HRMS (DART) calcd for C<sub>22</sub>H<sub>18</sub>BN<sub>3</sub>F ([M+H]<sup>+</sup>) 354.15723, found 354.15886.

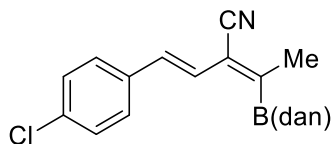

**4h**

**4h**, with 5 mol % **L1** at 115 °C, 84% yield (run1: 82%, run2: 86%), >98:2. <sup>1</sup>H NMR (600 MHz, CDCl<sub>3</sub>) δ 7.32 (d, *J* = 8.5 Hz, 2H), 7.27 (d, *J* = 8.4 Hz, 2H), 7.18 – 7.08 (m, 4H), 6.96 (d, *J* = 15.8 Hz, 1H), 6.89 (d, *J* = 15.8 Hz, 1H), 6.39 (d, *J* = 7.1 Hz, 2H), 5.70 (s, 2H), 2.33 (s, 3H); <sup>13</sup>C NMR (151 MHz, CDCl<sub>3</sub>) δ 153.2 (br), 140.0, 136.4, 134.5, 134.3, 132.6, 129.2, 128.2, 127.8, 124.4, 120.5, 120.1, 118.9, 115.4, 106.7, 22.6; <sup>11</sup>B NMR (160 MHz, CDCl<sub>3</sub>) δ 28.8; IR (ATR) 3403, 3379, 2217, 1604, 1508, 1411, 1337, 1095, 820, 765 cm<sup>-1</sup>; HRMS (DART) calcd for C<sub>22</sub>H<sub>18</sub>BN<sub>3</sub>Cl ([M+H]<sup>+</sup>) 370.12768, found 370.12759.

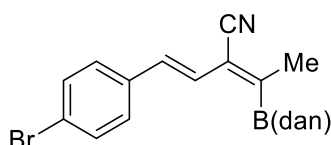

**4i**

**4i**, with 5 mol % **L1** at 115 °C, 55% yield (run1: 53%, run2: 57%), 95:5. <sup>1</sup>H NMR (500 MHz, THF-*d*<sub>8</sub>) δ 7.49 – 7.34 (m, 6H), 7.10 (dd, *J* = 15.9, 1.0 Hz, 1H), 7.03 (ddd, *J* = 8.3, 7.2, 1.0 Hz, 2H), 6.97 – 6.88 (m, 3H), 6.36 (dd, *J* = 7.3, 1.1 Hz, 2H), 2.31 (s, 3H); <sup>13</sup>C NMR (126 MHz, THF-*d*<sub>8</sub>) δ 142.7, 137.7, 136.5, 132.9, 132.0, 129.5, 128.4, 126.8, 122.9, 121.6, 120.3, 118.5, 115.9, 107.0, 22.8 (*B*-alkenyl carbon signal not observed); <sup>11</sup>B NMR (160 MHz, THF-*d*<sub>8</sub>) δ 29.0; IR (ATR) 3403, 3374, 2216, 1603, 1506, 1408, 1376, 1335, 1094, 1072, 1007, 819, 763, 754, 686 cm<sup>-1</sup>; HRMS (DART) calcd for C<sub>22</sub>H<sub>18</sub>BN<sub>3</sub>Br ([M+H]<sup>+</sup>) 414.07717, found 414.07770.

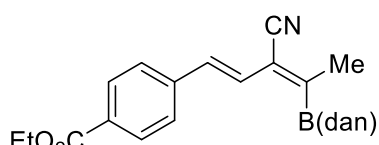

**4j**

**4j**, with 5 mol % **L1** at 115 °C, 69% yield, (run1: 71%, run2: 67%), >98:2. <sup>1</sup>H NMR (600 MHz, CDCl<sub>3</sub>) δ 7.99 – 7.94 (m, 2H), 7.47 – 7.41 (m, 2H), 7.18 – 7.09 (m, 4H), 7.02 (d, *J* = 4.1 Hz, 2H), 6.39 (dd, *J* = 7.0, 1.2 Hz, 2H), 5.73 (s, 2H), 4.35 (q, *J* = 7.1 Hz, 2H), 2.35 (s, 3H), 1.37 (t, *J* = 7.1 Hz, 3H); <sup>13</sup>C NMR (151 MHz, CDCl<sub>3</sub>) δ 166.3, 140.1, 140.0, 136.4, 132.8, 130.3, 130.2, 127.8, 126.9, 126.0, 120.5, 120.1, 119.0, 115.3, 106.8, 61.2, 22.7, 14.5 (*B*-alkenyl carbon signal not observed); <sup>11</sup>B NMR (160 MHz, CDCl<sub>3</sub>) δ 28.9; IR (ATR) 3372, 2223, 1691, 1603, 1510, 1409, 1335, 1290, 1272, 1182, 1097, 765, 698 cm<sup>-1</sup>; HRMS (DART) calcd for C<sub>25</sub>H<sub>23</sub>BN<sub>3</sub>O<sub>2</sub> ([M+H]<sup>+</sup>) 408.18778, found 408.18712.

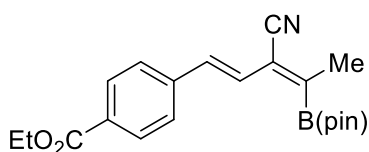

**4j-B(pin)**

**4j-B(pin)**, with 5 mol % **L1** at 115 °C, pinacol (236 mg, 2.00 mmol, 10.0 equiv.) in CH<sub>2</sub>Cl<sub>2</sub> (5 mL) was used rather than 1,8-diaminonaphthlene, purified by silica gel chromatography using hexanes/EtOAc (10/1) as the eluent, 56% yield (run1: 58%, run2: 53%), >98:2. Crystals for single crystal X-ray diffraction analysis were obtained by recrystallization from hexane/CH<sub>2</sub>Cl<sub>2</sub> at room temperature. <sup>1</sup>H NMR (600 MHz, CDCl<sub>3</sub>) δ 8.06 – 8.00 (m, 2H), 7.76 (d, *J* = 16.0 Hz, 1H), 7.51 – 7.45 (m, 2H), 7.03 (d, *J* = 16.0 Hz, 1H), 4.38 (q, *J* = 7.1 Hz, 2H), 2.25 (s, 3H), 1.40 (t, *J* = 7.1 Hz, 3H), 1.35 (s, 12H); <sup>13</sup>C NMR (151 MHz, CDCl<sub>3</sub>) δ 166.4, 140.9, 133.1, 130.2 (2 signals), 127.1, 126.9, 125.7, 115.5, 84.7, 61.1, 25.0, 21.9, 14.5 (*B*-alkenyl carbon signal not observed); <sup>11</sup>B NMR (160 MHz, CDCl<sub>3</sub>) δ 29.4; IR (ATR) 2979, 2929, 2221, 1712, 1605, 1361, 1269, 1141, 1102, 1019, 764, 847, 679, 627 cm<sup>-1</sup>; HRMS (DART) calcd for C<sub>21</sub>H<sub>27</sub>BNO<sub>4</sub> ([M+H]<sup>+</sup>) 368.20277, found 368.20267.

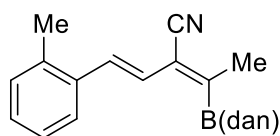

**4k**

**4k**, with 5 mol % **L1** at 115 °C, 58% yield (run1: 60%, run2: 56%), 94:6.  $^1\text{H}$  NMR (600 MHz,  $\text{CDCl}_3$ )  $\delta$  7.40 (d,  $J = 7.7$  Hz, 1H), 7.32 – 7.23 (m, 1H), 7.20 – 7.08 (m, 7H), 6.86 (d,  $J = 15.7$  Hz, 1H), 6.39 (dd,  $J = 7.2, 1.2$  Hz, 2H), 5.74 (s, 2H), 2.42 (s, 3H), 2.34 (s, 3H);  $^{13}\text{C}$  NMR (151 MHz,  $\text{CDCl}_3$ )  $\delta$  152.6 (br), 140.1, 136.5, 136.3, 134.8, 131.6, 130.7, 128.6, 127.8, 126.4, 125.6, 125.0, 120.9, 120.0, 118.7, 115.7, 106.7, 22.5, 19.9;  $^{11}\text{B}$  NMR (160 MHz,  $\text{CDCl}_3$ )  $\delta$  28.9; IR (ATR) 3395, 3055, 2926, 2219, 1629, 1600, 1505, 1408, 1373, 1335, 1093, 957, 908, 820, 766, 732  $\text{cm}^{-1}$ ; HRMS (DART) calcd for  $\text{C}_{23}\text{H}_{21}\text{BN}_3$  ( $[\text{M}+\text{H}]^+$ ) 350.18230, found 350.18173.

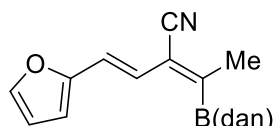

**4l**

**4l**, with 5 mol% **L5** at 105 °C, 71% yield (run1: 69%, run2: 73%), 98:2.  $^1\text{H}$  NMR (500 MHz,  $\text{CDCl}_3$ )  $\delta$  7.34 (d,  $J = 1.6$  Hz, 1H), 7.20 – 7.05 (m, 4H), 6.91 – 6.74 (m, 2H), 6.39 (m, 4H), 5.73 (s, 2H), 2.31 (s, 3H);  $^{13}\text{C}$  NMR (126 MHz,  $\text{CDCl}_3$ )  $\delta$  151.8, 143.3, 140.2, 136.3, 127.8, 122.2, 121.2, 120.4, 120.1, 118.7, 115.5, 112.1, 111.3, 106.7, 22.5 (*B*-alkenyl carbon signal not observed);  $^{11}\text{B}$  NMR (160 MHz,  $\text{CDCl}_3$ )  $\delta$  28.8; IR (ATR) 3389, 3053, 2924, 2220, 1629, 1598, 1503, 1407, 1334, 1263, 1094, 1013, 820, 766, 736  $\text{cm}^{-1}$ ; HRMS (DART) calcd for  $\text{C}_{20}\text{H}_{17}\text{BN}_3\text{O}$  ( $[\text{M}+\text{H}]^+$ ) 326.14592, found 326.14575.

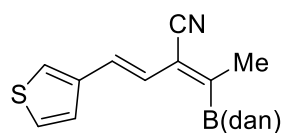

**4m**

**4m**, with 5 mol % **L1** at 115 °C, 72% yield (run1: 70%, run2: 74%), 97:3.  $^1\text{H}$  NMR (500 MHz,  $\text{CDCl}_3$ )  $\delta$  7.28 (dd,  $J = 3.1, 1.2$  Hz, 1H), 7.24 (dd,  $J = 3.0, 0.6$  Hz, 1H), 7.19 – 7.09 (m, 5H), 7.03 (d,  $J = 15.8$  Hz, 1H), 6.77 (d,  $J = 15.8$  Hz, 1H), 6.38 (dd,  $J = 7.1, 1.2$  Hz, 2H), 5.71 (s, 2H), 2.31 (s, 3H);  $^{13}\text{C}$  NMR (126 MHz,  $\text{CDCl}_3$ )  $\delta$  140.1, 138.6, 136.4, 128.0, 127.8, 126.8, 125.0, 124.6, 123.8, 120.7, 120.1, 118.8, 115.6, 106.7, 22.4 (*B*-alkenyl carbon signal not observed);  $^{11}\text{B}$  NMR (160 MHz,  $\text{CDCl}_3$ )  $\delta$  28.9; IR (ATR) 3394, 3053, 2219, 1628, 1599, 1504, 1407, 1373, 1335, 1095, 820, 766, 650  $\text{cm}^{-1}$ ; HRMS (DART) calcd for  $\text{C}_{20}\text{H}_{17}\text{BN}_3\text{S}$  ( $[\text{M}+\text{H}]^+$ ) 342.12308, found 342.12416.

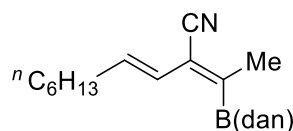

**4n**

**4n**, with 7 mol % **L1** at 125 °C, 60% yield (run1: 62%, run2: 57%), 96:4.  $^1\text{H}$  NMR (600 MHz,  $\text{CDCl}_3$ )  $\delta$  7.14 (dd,  $J = 8.3, 7.3$  Hz, 2H), 7.09 (dd,  $J = 8.3, 1.0$  Hz, 2H), 6.37 (dd,  $J = 7.2, 1.0$  Hz, 2H), 6.24 (d,  $J = 15.4$  Hz, 1H), 6.18 (dt,  $J = 15.4, 6.7$  Hz, 1H), 5.69 (d,  $J = 4.4$  Hz, 2H), 2.24 (s, 3H), 2.14 (q,  $J = 7.2$  Hz, 2H), 1.41 (h,  $J = 6.8$  Hz, 2H), 1.34 – 1.20 (m, 6H), 0.88 (t,  $J = 6.9$  Hz, 3H);  $^{13}\text{C}$  NMR (151 MHz,  $\text{CDCl}_3$ )  $\delta$  149.8 (br), 140.2, 137.1, 136.3, 127.7, 125.5, 120.4, 120.0, 118.6, 115.9, 106.5, 32.7, 31.7, 29.1, 29.0, 22.7, 22.0, 14.2;  $^{11}\text{B}$  NMR (160 MHz,  $\text{CDCl}_3$ )  $\delta$  28.8; IR (ATR) 3367, 3054, 2954, 2853, 2218, 1598, 1505, 1406, 1372, 1361, 1333, 1095, 957, 820, 764, 664  $\text{cm}^{-1}$ ; HRMS (DART) calcd for  $\text{C}_{22}\text{H}_{27}\text{BN}_3$  ( $[\text{M}+\text{H}]^+$ ) 344.22925, found 344.22994.

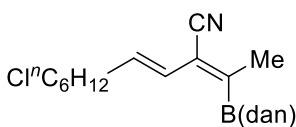

**4o**

**4o**, with 7 mol % **L1** at 125 °C, 55% yield (run1: 57%, run2: 53%), 96:4.  $^1\text{H}$  NMR (600 MHz,  $\text{CDCl}_3$ )  $\delta$  7.14 (t,  $J = 7.8$  Hz, 2H), 7.09 (d,  $J = 8.3$  Hz, 2H), 6.37 (d,  $J = 7.2$  Hz, 2H), 6.23 (d,  $J = 15.4$  Hz, 1H), 6.16 (dt,  $J = 14.9, 6.8$  Hz, 1H), 5.65 (s, 2H), 3.50 (t,  $J = 6.7$  Hz, 2H), 2.24 (s, 3H), 2.14 (apparent q,  $J = 7.2$  Hz, 2H), 1.74 (apparent p,  $J = 7.0$  Hz, 2H), 1.42 (apparent h,  $J = 7.5$  Hz, 4H), 1.32 (apparent p,  $J = 7.6$  Hz, 2H);  $^{13}\text{C}$  NMR (151 MHz,  $\text{CDCl}_3$ )  $\delta$  140.2,

136.8, 136.4, 127.7, 125.8, 120.4, 120.0, 118.7, 115.8, 106.5, 45.2, 32.6, 32.6, 29.0, 28.5, 26.8, 22.0 (*B*-alkenyl carbon signal not observed);  $^{11}\text{B}$  NMR (160 MHz,  $\text{CDCl}_3$ )  $\delta$  29.0; IR (ATR) 3393, 3054, 2927, 2854, 2218, 1628, 1598, 1504, 1406, 1373, 1333, 1095, 820, 765, 730, 665  $\text{cm}^{-1}$ ; HRMS (DART) calcd for  $\text{C}_{22}\text{H}_{26}\text{BN}_3\text{Cl}$  ( $[\text{M}+\text{H}]^+$ ) 378.19028, found 378.18893.

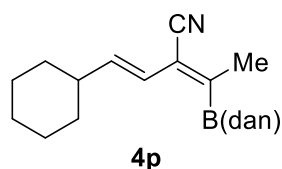

**4p**, with 7 mol % **L1** at 125 °C, 60% yield (run1: 61%, run2: 59%), 93:7.  $^1\text{H}$  NMR (600 MHz,  $\text{CDCl}_3$ )  $\delta$  7.14 (dd,  $J$  = 8.3, 7.2 Hz, 2H), 7.09 (dd,  $J$  = 8.3, 1.0 Hz, 2H), 6.37 (dd,  $J$  = 7.3, 1.0 Hz, 2H), 6.20 (dd,  $J$  = 15.5, 1.0 Hz, 1H), 6.12 (dd,  $J$  = 15.5, 7.1 Hz, 1H), 5.66 (s, 2H), 2.24 (s, 3H), 2.06 (tdt,  $J$  = 10.9, 7.0, 3.4 Hz, 1H), 1.71 (ddq,  $J$  = 13.6, 7.2, 3.4 Hz, 4H), 1.64 (dtd,  $J$  = 12.4,

3.6, 1.7 Hz, 1H), 1.25 (m, 2H), 1.20 – 1.06 (m, 3H);  $^{13}\text{C}$  NMR (151 MHz,  $\text{CDCl}_3$ )  $\delta$  149.8 (br), 142.6, 140.2, 136.4, 127.7, 123.3, 120.7, 120.0, 118.6, 115.9, 106.5, 41.1, 32.8, 26.0, 25.9, 22.1;  $^{11}\text{B}$  NMR (160 MHz,  $\text{CDCl}_3$ )  $\delta$  28.7; IR (ATR) 3429, 3393, 2926, 2852, 2218, 1600, 1504, 1408, 1335, 1264, 1093, 963, 820, 732, 703  $\text{cm}^{-1}$ ; HRMS (DART) calcd for  $\text{C}_{22}\text{H}_{25}\text{BN}_3$  ( $[\text{M}+\text{H}]^+$ ) 342.21360, found 342.21457.

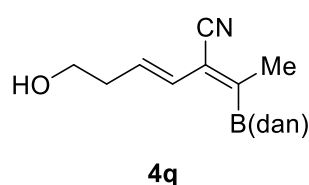

**1q** was pre-treated with HBCat (29 mg, 0.24 mmol, 1.2 equiv.) in  $\text{CH}_2\text{Cl}_2$  (1.0 mL) followed by removal of volatiles under high vacuum (150 mmTor) for 30 min at room temperature. This material was then used for the *trans*-selective cyanoboration reaction with 7 mol % **L1** at 125 °C, 35% yield (run1: 32%, run2: 37%), 98:2. **4q** appears to decompose

slowly on silica gel column.  $^1\text{H}$  NMR (500 MHz,  $\text{CDCl}_3$ )  $\delta$  7.13 (dd,  $J$  = 8.3, 7.2 Hz, 2H), 7.08 (dd,  $J$  = 8.4, 1.2 Hz, 2H), 6.39 – 6.31 (m, 3H), 6.17 (dt,  $J$  = 15.0, 7.1 Hz, 1H), 5.66 (s, 2H), 3.73 (t,  $J$  = 6.4 Hz, 2H), 2.46 – 2.35 (m, 2H), 2.25 (s, 3H), 1.39 (s, 1H);  $^{13}\text{C}$  NMR (151 MHz,  $\text{CDCl}_3$ )  $\delta$  151.2 (br), 140.2, 136.3, 132.5, 128.1, 127.7, 120.1, 120.0, 118.6, 115.7, 106.6, 61.7, 35.9, 22.1;  $^{11}\text{B}$  NMR (160 MHz,  $\text{CDCl}_3$ )  $\delta$  28.9; IR (ATR) 3387, 3053, 2926, 2219, 1599, 1509, 1408, 1373, 1335, 1096, 1036, 821, 768  $\text{cm}^{-1}$ ; HRMS (DART) calcd for  $\text{C}_{18}\text{H}_{19}\text{BN}_3\text{O}$  ( $[\text{M}+\text{H}]^+$ ) 304.16157, found 304.16183.

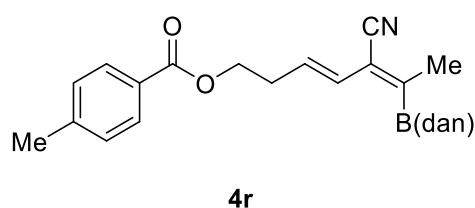

**4r**, with 7 mol % **L1** at 135 °C, 73% yield (run1: 71%, run2: 75%), 96:4.  $^1\text{H}$  NMR (600 MHz,  $\text{CDCl}_3$ )  $\delta$  7.93 – 7.83 (m, 2H), 7.18 (d,  $J$  = 8.0 Hz, 2H), 7.15 – 7.04 (m, 4H), 6.44 – 6.36 (m, 1H), 6.32 (dd,  $J$  = 7.2, 1.1 Hz, 2H), 6.23 (dt,  $J$  = 14.9, 7.1 Hz, 1H), 5.69 (s, 2H), 4.36 (t,  $J$  = 6.5 Hz, 2H), 2.60 (q,  $J$  = 6.7 Hz, 2H), 2.39 (s, 3H), 2.24 (s,

3H);  $^{13}\text{C}$  NMR (151 MHz,  $\text{CDCl}_3$ )  $\delta$  166.6, 151.6 (br), 143.8, 140.1, 136.3, 131.5, 129.7, 129.2, 128.1, 127.7, 127.4, 120.0, 120.0, 118.7, 115.6, 106.6, 63.6, 32.0, 22.2, 21.8;  $^{11}\text{B}$  NMR (160 MHz,  $\text{CDCl}_3$ )  $\delta$  28.5; IR (ATR) 3367, 2957, 2219, 1702, 1599, 1508, 1407, 1373, 1335, 1274, 1178, 1096, 908, 820, 768, 754, 731  $\text{cm}^{-1}$ ; HRMS (DART) calcd for  $\text{C}_{26}\text{H}_{25}\text{BN}_3\text{O}_2$  ( $[\text{M}+\text{H}]^+$ ) 422.20343, found 422.20384.

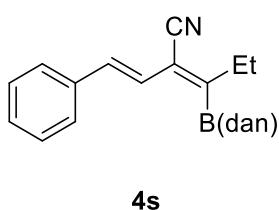

**4s**, with 5 mol % **L1** at 115 °C, 66% yield (run1: 63%, run2: 68%), 93:7.  $^1\text{H}$  NMR (500 MHz,  $\text{CDCl}_3$ )  $\delta$  7.40 (d,  $J$  = 7.4 Hz, 2H), 7.31 (t,  $J$  = 7.3 Hz, 2H), 7.27 (d,  $J$  = 6.9 Hz, 1H), 7.17 (t,  $J$  = 7.7 Hz, 2H), 7.12 (d,  $J$  = 8.2 Hz, 2H), 7.04 (d,  $J$  = 15.9 Hz, 1H), 6.91 (d,  $J$  = 15.8 Hz, 1H), 6.40 (d,  $J$  = 7.1 Hz, 2H), 5.74 (s, 2H), 2.71 (q,  $J$  = 7.6 Hz, 2H), 1.22 (t,  $J$  = 7.6 Hz, 3H);  $^{13}\text{C}$  NMR (126 MHz,  $\text{CDCl}_3$ )  $\delta$  159.2 (br), 140.1, 136.4, 135.9, 134.1, 128.9, 128.7, 127.8,

127.1, 124.1, 120.1, 119.5, 118.8, 115.5, 106.7, 30.1, 14.0;  $^{11}\text{B}$  NMR (160 MHz,  $\text{CDCl}_3$ )  $\delta$  29.0; IR (ATR) 3382, 3052, 2966, 2214, 1599, 1504, 1406, 1373, 1333, 1166, 1103, 951, 818, 761, 750, 686  $\text{cm}^{-1}$ ; HRMS (DART) calcd for  $\text{C}_{23}\text{H}_{21}\text{BN}_3$  ( $[\text{M}+\text{H}]^+$ ) 350.18230, found 350.18183.

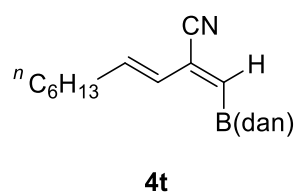

**4t**, with 10 mol %  $\text{Pd}(\text{COD})(\text{CH}_2\text{TMS})_2$  and 10 mol% **L5** at 90 °C for 40 min, 45% yield (run1: 47%, run2: 43%), 96:4.  $^1\text{H}$  NMR (500 MHz,  $\text{CDCl}_3$ )  $\delta$  7.13 (dd,  $J = 8.3, 7.2$  Hz, 2H), 7.07 (dd,  $J = 8.3, 1.0$  Hz, 2H), 6.42 – 6.23 (m, 5H), 5.68 (s, 2H), 2.20 (td,  $J = 7.5, 5.9$  Hz, 2H), 1.50 – 1.38 (m, 2H), 1.36 – 1.23 (m, 6H), 0.92 – 0.82 (m, 3H);  $^{13}\text{C}$  NMR (126 MHz,  $\text{CDCl}_3$ )  $\delta$  141.3, 140.2, 137.7 (br), 136.4, 127.7, 126.6, 125.0, 120.1, 118.7, 117.9, 106.5, 32.9, 31.8, 29.0, 28.9, 22.7, 14.2;  $^{11}\text{B}$  NMR (160 MHz,  $\text{CDCl}_3$ )  $\delta$  27.5; IR (ATR) 3387, 2923, 2853, 2223, 1629, 1598, 1502, 1406, 1373, 1331, 1165, 1143, 1047, 962, 819, 763  $\text{cm}^{-1}$ ; HRMS (DART) calcd for  $\text{C}_{21}\text{H}_{25}\text{BN}_3$  ( $[\text{M}+\text{H}]^+$ ) 330.21360, found 330.21405.

### Assignment of the *trans/cis* Configuration of the Products

The *trans/cis* configuration of **4b** and **4j-B(pin)** was unambiguously determined by single-crystal X-ray diffraction analysis of the corresponding major pure isolated product. The assignment of the *trans/cis* configuration of the other products shown in Table 2 and Table 3 are made by analogy based on characteristic  $^1\text{H}$  NMR signature of the Me and NH(Bdan) signals: the Me signal of the *trans* product (signal A) appears more downfield than the Me signal (signal B) of the *cis* product, and the NH(Bdan) signal of the *trans* product (signal C) appears more upfield than the NH(Bdan) signal (signal D) of the *cis* product (see below spectra). A mixture of *trans/cis* products can oftentimes be obtained in small quantities during the silica gel chromatography purification process. The labeled  $^1\text{H}$  NMR spectra are shown using compound **4b** as the representative example.

Fraction 2 of the crude mixture after column purification, pure **4b**.

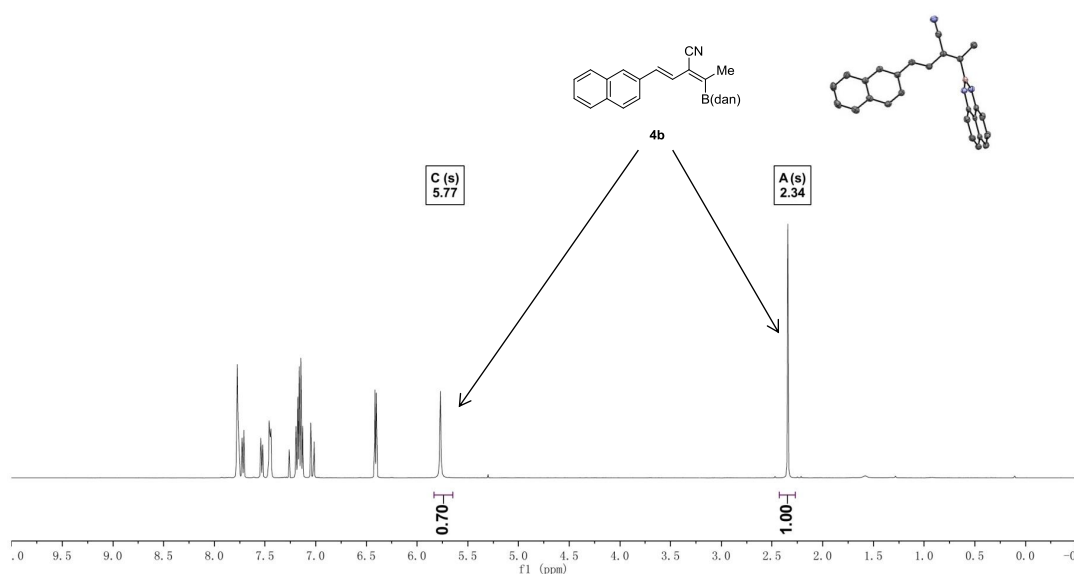



Fraction 1 of the crude mixture after column purification, **4b** and **4b-cis** mixture.

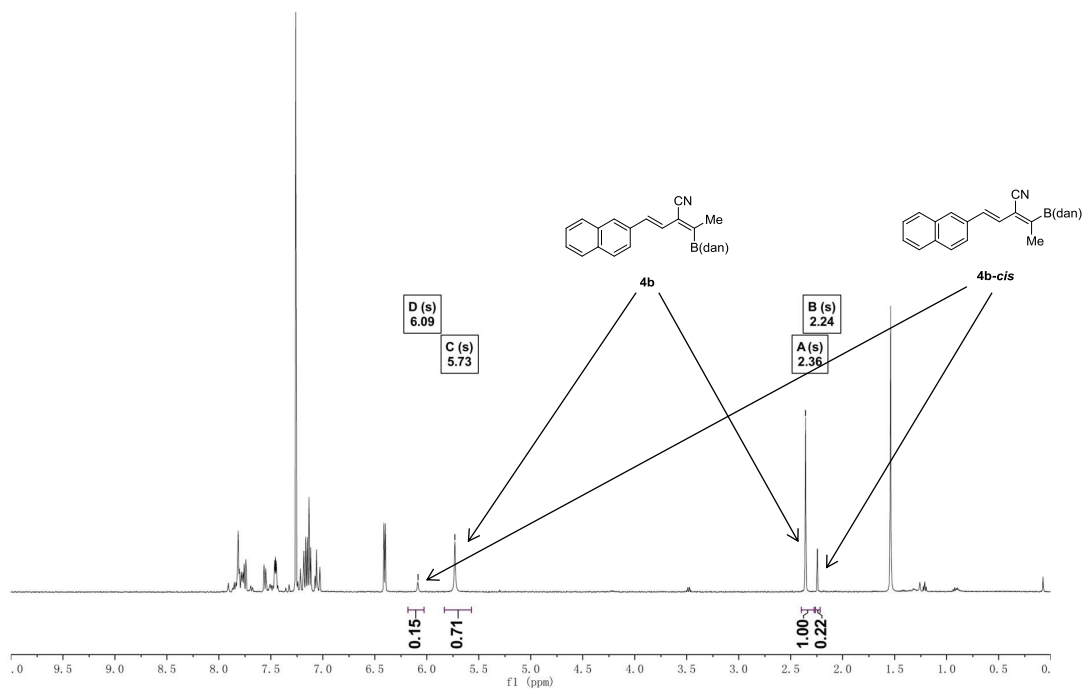

Crude mixture of **4b** and **4b-cis** after quenching with dan.

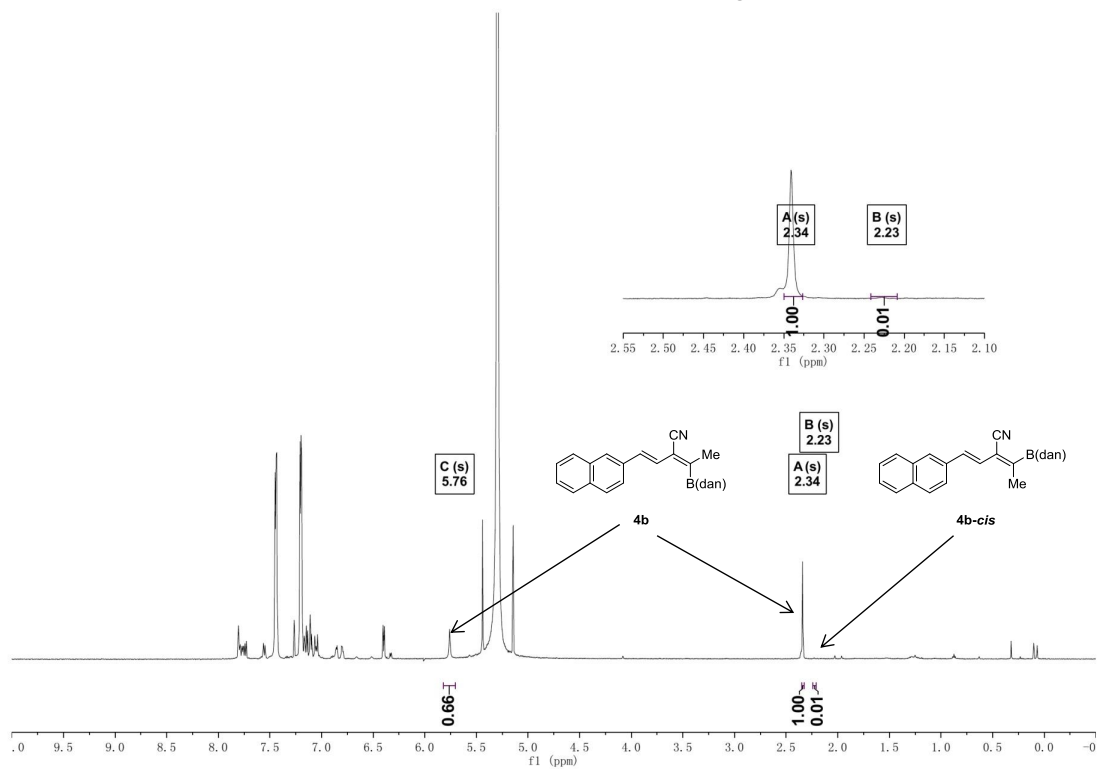

## General Procedure for *trans*-Selective Cyanoboration Reaction of 1,3-Enynes (Table 3)

To a 4-mL vial charged with Pd(COD)(CH<sub>2</sub>TMS)<sub>2</sub> (3.9 mg, 0.010 mmol, 10 mol %), **L5** (4.3 mg, 0.010 mmol, 10 mol %), CuCN (16 mg, 0.18 mmol, 1.8 equiv), BCatCl (28 mg, 0.18 mmol, 1.8 equiv.) and *o*-DCB (0.10 mL) was added the corresponding enyne (0.10 mmol, 1.0 equiv). The resulting mixture was allowed to stir for 1 hour at 105 °C. At the conclusion of the reaction, the mixture was passed through an acrodisc with CH<sub>2</sub>Cl<sub>2</sub> under nitrogen. 1,8-diaminonaphthlene (32 mg, 0.20 mmol, 2.0 equiv) was then added to the filtrate, and the mixture was allowed to stir for another 12 hours. The reaction mixture was then again passed through an acrodisc and concentrated under reduced pressure. The resulting crude residue was purified by silica gel chromatography using hexanes/CH<sub>2</sub>Cl<sub>2</sub> (4/1 to 1/1 gradient) as the eluent to afford the pure *trans*-selective cyanoboration product as yellow solids.

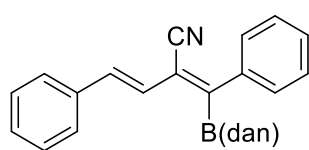

**5a**

**5a**, 60% yield (run1: 62%, run2: 57%), 86:14. <sup>1</sup>H NMR (500 MHz, CDCl<sub>3</sub>) δ 7.59 (d, *J* = 7.5 Hz, 2H), 7.49 – 7.38 (m, 5H), 7.32 (m, 3H), 7.24 (d, *J* = 15.4 Hz, 1H), 7.14 (m, 5H), 6.37 (d, *J* = 6.8 Hz, 2H), 5.79 (s, 2H); <sup>13</sup>C NMR (151 MHz, CDCl<sub>3</sub>) δ 140.2, 138.9, 136.4, 135.7, 129.5, 129.1, 129.0, 129.0, 128.8, 127.8, 127.6, 127.3, 124.9, 120.1, 119.1, 118.9, 116.6, 106.8 (*B*-alkenyl carbon signal not observed); <sup>11</sup>B NMR (160 MHz, CDCl<sub>3</sub>) δ 29.1; IR (ATR) 3396, 3055, 2219, 1628, 1599, 1504, 1407, 1373, 1336, 1149, 820, 766, 695 cm<sup>-1</sup>; HRMS (DART) calcd for C<sub>27</sub>H<sub>21</sub>BN<sub>3</sub> ([M+H]<sup>+</sup>) 398.18230, found 398.18286.

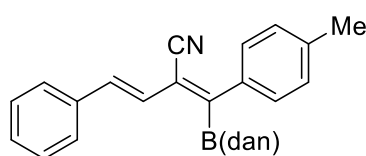

**5b**

**5b**, 48% yield (run1: 46%, run2: 50%), 75:25. <sup>1</sup>H NMR (500 MHz, CDCl<sub>3</sub>) δ 7.51 (d, *J* = 7.9 Hz, 2H), 7.45 (d, *J* = 7.0 Hz, 2H), 7.37 – 7.18 (m, 6H), 7.19 – 7.09 (m, 5H), 6.36 (dd, *J* = 7.0, 1.4 Hz, 2H), 5.79 (s, 2H), 2.40 (s, 3H); <sup>13</sup>C NMR (126 MHz, CDCl<sub>3</sub>) δ 140.2, 139.8, 136.4, 136.0, 135.9, 135.3, 129.7, 129.0, 129.0, 128.9, 127.8, 127.3, 125.0, 120.1, 118.8, 118.3, 116.9, 106.8, 21.5 (*B*-alkenyl carbon signal not observed); <sup>11</sup>B NMR (160 MHz, CDCl<sub>3</sub>) δ 28.8; IR (ATR) 3419, 3055, 2923, 2219, 1599, 1507, 1406, 1374, 1338, 1260, 1147, 1052, 961, 908, 819, 765, 732 cm<sup>-1</sup>; HRMS (DART) calcd for C<sub>28</sub>H<sub>23</sub>BN<sub>3</sub> ([M+H]<sup>+</sup>) 412.19795, found 412.19878.

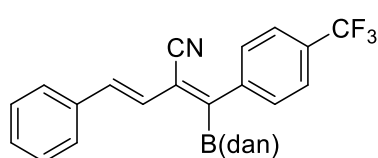

**5c**

**5c**, 84% yield (run1: 82%, run2: 86%), 93:7. <sup>1</sup>H NMR (600 MHz, CDCl<sub>3</sub>) δ 7.70 (d, *J* = 8.5 Hz, 2H), 7.67 (d, *J* = 8.3 Hz, 2H), 7.49 – 7.42 (m, 2H), 7.37 – 7.30 (m, 3H), 7.27 (d, *J* = 15.6 Hz, 1H), 7.18 – 7.12 (m, 5H), 6.38 (dd, *J* = 6.7, 1.6 Hz, 2H), 5.78 (s, 2H); <sup>13</sup>C NMR (151 MHz, CDCl<sub>3</sub>) δ 152.3 (br), 142.6, 139.9, 137.0, 136.3, 135.4, 131.1 (q, *J* = 32.9 Hz), 129.5, 129.1, 129.1, 127.8, 127.5, 126.0 (q, *J* = 3.8 Hz), 124.4, 124.0 (q, *J* = 272.4 Hz), 120.9, 120.1, 119.1, 116.1, 106.9; <sup>11</sup>B NMR (160 MHz, CDCl<sub>3</sub>) δ 29.0; <sup>19</sup>F NMR (564 MHz, CDCl<sub>3</sub>) δ -62.8; IR (ATR) 3394, 3055, 2921, 2217, 1628, 1598, 1502, 1408, 1373, 1334, 1148, 907, 820, 767, 730, 692, 648 cm<sup>-1</sup>; HRMS (DART) calcd for C<sub>28</sub>H<sub>20</sub>BN<sub>3</sub>F<sub>3</sub> ([M+H]<sup>+</sup>) 466.16969, found 466.16856.

**5d**, 86% yield (run1: 88%, run2: 83%), >98:2. <sup>1</sup>H NMR (600 MHz, CDCl<sub>3</sub>) δ 7.96 (d, *J* = 1.5 Hz, 2H), 7.93 (s, 1H), 7.52 – 7.45 (m, 2H), 7.39 – 7.34 (m, 3H), 7.32 (d, *J* = 15.8 Hz, 1H), 7.20 – 7.13 (m, 5H), 6.41 (dd,

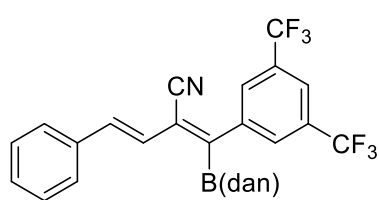

**5d**

$J = 5.9, 2.4$  Hz, 2H), 5.79 (s, 2H);  $^{13}\text{C}$  NMR (151 MHz,  $\text{CDCl}_3$ )  $\delta$  150.1 (br), 141.2, 139.7, 138.2, 136.3, 135.2, 132.5 (q,  $J = 33.7$  Hz), 129.8, 129.2, 128.8 (d,  $J = 3.5$  Hz), 128.7 (d,  $J = 4.1$  Hz), 127.8, 127.6, 123.8, 123.1 (q,  $J = 273.0$  Hz), 122.9 (p,  $J = 3.8$  Hz), 122.7, 119.4, 115.5, 107.1;  $^{11}\text{B}$  NMR (160 MHz,  $\text{CDCl}_3$ )  $\delta$  28.7;  $^{19}\text{F}$  NMR (564 MHz,  $\text{CDCl}_3$ )  $\delta$  -62.8; IR (ATR) 3394, 3057, 2224, 1600, 1503, 1407, 1372, 1275, 1176, 1129, 820, 736, 680  $\text{cm}^{-1}$ ;

HRMS (DART) calcd for  $\text{C}_{29}\text{H}_{19}\text{BN}_3\text{F}_6$  ( $[\text{M}+\text{H}]^+$ ) 534.15707, found 534.15663.

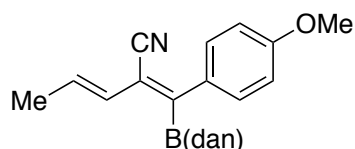

**5e**

**5e**, obtained by using hexane/ $\text{Et}_2\text{O}$  (5/1) as eluent, 71% yield (run1: 69%, run2: 73%), 94:6.  $^1\text{H}$  NMR (500 MHz,  $\text{CDCl}_3$ )  $\delta$  7.58 – 7.48 (m, 2H), 7.18 – 7.07 (m, 4H), 6.96 – 6.89 (m, 2H), 6.47 – 6.31 (m, 4H), 5.73 (s, 2H), 3.83 (s, 3H), 1.88 (dd,  $J = 6.3, 1.1$  Hz, 3H);  $^{13}\text{C}$  NMR (126 MHz,  $\text{CDCl}_3$ )  $\delta$  160.4, 151.5 (br), 140.3, 136.3, 132.9, 131.0, 130.4, 128.1, 127.7, 120.0, 118.6, 117.3, 116.8, 114.3, 106.6, 55.4, 18.4;  $^{11}\text{B}$  NMR (160 MHz,  $\text{CDCl}_3$ )  $\delta$  29.0; IR (ATR) 3366, 2930, 2214, 1629, 1598, 1507, 1409, 1373, 1333, 1248, 1180, 1154, 1031, 953, 908, 821, 768, 732  $\text{cm}^{-1}$ ; HRMS (DART) calcd for  $\text{C}_{23}\text{H}_{21}\text{BN}_3\text{O}$  ( $[\text{M}+\text{H}]^+$ ) 366.17722, found 366.17607.

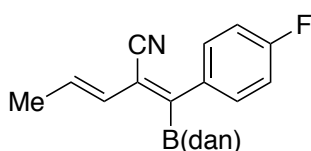

**5f**

**5f**, 70% yield (run1: 67%, run2: 72%), 95:5.  $^1\text{H}$  NMR (500 MHz,  $\text{CDCl}_3$ )  $\delta$  7.52 (dd,  $J = 8.4, 5.3$  Hz, 2H), 7.17 – 7.04 (m, 6H), 6.47 – 6.39 (m, 2H), 6.35 (dd,  $J = 7.0, 1.2$  Hz, 2H), 5.70 (s, 2H), 1.90 (d,  $J = 4.9$  Hz, 3H);  $^{13}\text{C}$  NMR (151 MHz,  $\text{CDCl}_3$ )  $\delta$  163.1 (d,  $J = 250.1$  Hz), 150.6 (br), 140.1, 136.3, 134.9 (d,  $J = 3.5$  Hz), 134.3 (two signals), 130.6 (d,  $J = 8.3$  Hz), 127.8, 120.0, 119.0, 118.9, 116.7, 116.0 (d,  $J = 21.8$  Hz), 106.7, 18.5;  $^{11}\text{B}$  NMR (160 MHz,  $\text{CDCl}_3$ )  $\delta$  29.0;  $^{19}\text{F}$  NMR (470 MHz,  $\text{CDCl}_3$ )  $\delta$  -111.5 (tt,  $J = 9.1, 5.2$  Hz); IR (ATR) 3369, 2919, 2213, 1600, 1504, 1413, 1374, 1335, 1231, 1159, 959, 820, 768  $\text{cm}^{-1}$ ; HRMS (DART) calcd for  $\text{C}_{22}\text{H}_{18}\text{BN}_3\text{F}$  ( $[\text{M}+\text{H}]^+$ ) 354.15723, found 354.15671.

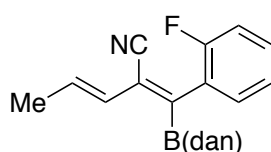

**5g**

**5g**, 63% yield (run1: 64%, run2: 61%), 98:2. Crystals for single crystal X-ray diffraction analysis were obtained by recrystallization from hexane/ $\text{CH}_2\text{Cl}_2$  at  $-30$   $^\circ\text{C}$ .  $^1\text{H}$  NMR (500 MHz,  $\text{THF}-d_8$ )  $\delta$  7.51 – 7.35 (m, 3H), 7.30 (tdd,  $J = 7.3, 5.1, 1.8$  Hz, 1H), 7.16 (td,  $J = 7.6, 1.1$  Hz, 1H), 7.10 (ddd,  $J = 9.7, 8.4, 1.1$  Hz, 1H), 6.97 (t,  $J = 7.8$  Hz, 2H), 6.89 (dd,  $J = 8.3, 1.0$  Hz, 2H), 6.59 (dq,  $J = 15.3, 1.6$  Hz, 1H), 6.37 – 6.23 (m, 3H), 1.84 (dd,  $J = 6.8, 1.6$  Hz, 3H);  $^{13}\text{C}$  NMR (126 MHz,  $\text{THF}-d_8$ )  $\delta$  160.6 (d,  $J = 247.6$  Hz), 142.6, 137.5, 133.8, 131.5 (d,  $J = 2.8$  Hz), 131.1 (d,  $J = 8.2$  Hz), 129.2, 128.8 (d,  $J = 14.8$  Hz), 128.2, 125.1 (d,  $J = 3.5$  Hz), 122.6, 121.5, 118.3, 116.6 (d,  $J = 22.0$  Hz), 116.3, 106.8, 18.2 (*B*-alkenyl carbon signal not observed);  $^{11}\text{B}$  NMR (160 MHz,  $\text{THF}-d_8$ )  $\delta$  25.4;  $^{19}\text{F}$  NMR (470 MHz,  $\text{THF}-d_8$ )  $\delta$  -110.2 (m); IR (ATR) 3060, 2977, 2923, 2218, 1638, 1555, 1447, 1394, 1360, 1334, 1266, 1229, 1139, 976, 953, 850, 801, 755  $\text{cm}^{-1}$ ; HRMS (DART) calcd for  $\text{C}_{22}\text{H}_{18}\text{BN}_3\text{F}$  ( $[\text{M}+\text{H}]^+$ ) 354.15723, found 354.15738.

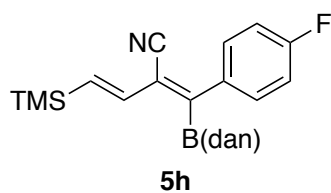

**5h**, 38% yield (run1: 40%, run2: 36%), 94:6.  $^1\text{H}$  NMR (500 MHz,  $\text{CDCl}_3$ )  $\delta$  7.56 – 7.48 (m, 2H), 7.19 – 7.06 (m, 6H), 6.89 (d,  $J$  = 18.5 Hz, 1H), 6.67 (d,  $J$  = 18.5 Hz, 1H), 6.34 (dd,  $J$  = 7.0, 1.4 Hz, 2H), 5.70 (s, 2H), 0.13 (s, 9H);  $^{13}\text{C}$  NMR (126 MHz,  $\text{CDCl}_3$ )  $\delta$  163.3 (d,  $J$  = 250.7 Hz), 153.5 (br), 140.0, 139.2, 138.6, 136.3, 134.9 (d,  $J$  = 3.6 Hz), 130.8 (d,  $J$  = 8.5 Hz), 127.8, 121.5, 120.0, 118.9, 116.5, 116.1 (d,  $J$  = 21.8 Hz), 106.6, -1.3;  $^{11}\text{B}$  NMR (160 MHz,  $\text{CDCl}_3$ )  $\delta$  29.8;  $^{19}\text{F}$  NMR (470 MHz,  $\text{CDCl}_3$ )  $\delta$  -110.9 (m); IR (ATR) 3360, 3056, 2955, 2897, 2218, 1599, 1505, 1409, 1373, 1336, 1247, 1235, 1160, 1145, 839, 820, 766  $\text{cm}^{-1}$ ; HRMS (DART) calcd for  $\text{C}_{24}\text{H}_{24}\text{BN}_3\text{FSi}$  ( $[\text{M}+\text{H}]^+$ ) 412.18111, found 412.18054.

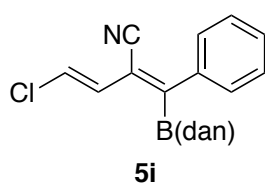

**5i**, with 15 mol % **L5**, 1.2 equiv.  $\text{CuCN}$  and 1.6 equiv.  $\text{BCatCl}$  at 90  $^\circ\text{C}$  for 25 min, obtained by using hexane/ $\text{Et}_2\text{O}$  (8/1) as the eluent, 28% yield (run1: 27%, run2: 28%), 96:4.  $^1\text{H}$  NMR (600 MHz,  $\text{CDCl}_3$ )  $\delta$  7.59 – 7.49 (m, 2H), 7.49 – 7.35 (m, 3H), 7.18 – 7.04 (m, 4H), 6.89 (d,  $J$  = 1.1 Hz, 2H), 6.36 (dt,  $J$  = 6.9, 1.3 Hz, 2H), 5.71 (s, 2H);  $^{13}\text{C}$  NMR (151 MHz,  $\text{CDCl}_3$ )  $\delta$  139.8, 138.1, 136.3, 130.1, 129.9, 129.1, 128.7, 127.8, 126.2, 120.1, 119.1, 115.8, 115.2, 106.9 (*B*-alkenyl carbon signal not observed);  $^{11}\text{B}$  NMR (160 MHz,  $\text{CDCl}_3$ )  $\delta$  29.0; IR (ATR) 3397, 3365, 3062, 2220, 1629, 1599, 1505, 1407, 1374, 1336, 1151, 1051, 820, 766, 732, 696  $\text{cm}^{-1}$ ; HRMS (DART) calcd for  $\text{C}_{21}\text{H}_{16}\text{BN}_3\text{Cl}$  ( $[\text{M}+\text{H}]^+$ ) 356.11203, found 356.11198.

## Functionalization of Cyanoboration Product 4a (Scheme 4)

Reaction sequence:

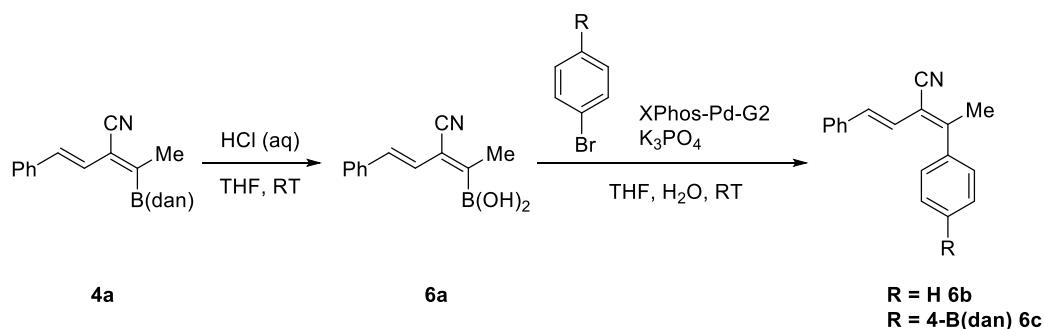

### Step 1:

Aqueous HCl (1.4 mL, 3.0 M) was added into a 20-mL vial charged with **4a** (33 mg, 0.10 mmol, 1.0 equiv.) and THF (2.8 mL). The resulting mixture was allowed to stir at room temperature for 30 minutes. At the conclusion of reaction, the mixture was diluted with Et<sub>2</sub>O (4 mL), and the organic layer was separated. The aqueous layer was extracted with Et<sub>2</sub>O (5 mL). The organic layers were combined and concentrated to afford **6a** as a mixture of boronic acid and the trimer boroxine. **6a** was used for the next step without further purification (quant. yield).

### Step 2:

Under nitrogen to a 4-mL vial charged with **6a** (from Step 1), XPhos-Pd-G2 (4 mg, 0.005 mmol, 0.05 equiv.), THF (0.3 mL), and aqueous K<sub>3</sub>PO<sub>4</sub> (0.3 mL, 0.5 M) the corresponding aryl bromide (0.15 mmol, 1.5 equiv.) was added. The resulting mixture was allowed to stir for 3 hours at room temperature. Then, H<sub>2</sub>O (1 mL) was added, and the organic layer was separated. The aqueous layer was further extracted with Et<sub>2</sub>O (3 mL), and the organic layers were combined and concentrated. The resulting crude material was purified by silica gel chromatography using hexanes/EtOAc (10/1) as the eluent to afford **6b-c**.

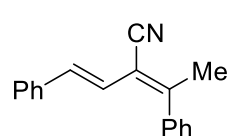

**6b**

**6b**, 86% yield. <sup>1</sup>H NMR (500 MHz, CDCl<sub>3</sub>) δ 7.48 – 7.36 (m, 3H), 7.31 – 7.16 (m, 7H), 7.01 (d, *J* = 16.0 Hz, 1H), 6.71 (d, *J* = 16.0 Hz, 1H), 2.53 (s, 3H); <sup>13</sup>C NMR (126 MHz, CDCl<sub>3</sub>) δ 153.7, 139.3, 136.3, 133.2, 129.1, 128.8, 128.8, 128.4, 128.1, 126.9, 122.2, 117.0, 112.2, 25.3; IR (ATR) 3058, 2922, 2219, 1492, 1441, 1274, 1025, 960, 765, 754, 699, 693 cm<sup>-1</sup>; HRMS (DART) calcd for C<sub>18</sub>H<sub>16</sub>N ([M+H]<sup>+</sup>) 246.12773, found 246.12774.

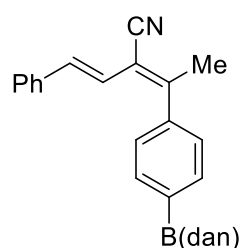

**6c**

**6c**, 85% yield. <sup>1</sup>H NMR (500 MHz, CDCl<sub>3</sub>) δ 7.72 (d, *J* = 7.8 Hz, 2H), 7.38 – 7.22 (m, 7H), 7.18 (t, *J* = 7.8 Hz, 2H), 7.10 (d, *J* = 8.3 Hz, 2H), 7.05 (d, *J* = 16.0 Hz, 1H), 6.74 (d, *J* = 16.0 Hz, 1H), 6.46 (d, *J* = 7.2 Hz, 2H), 6.09 (s, 2H), 2.56 (s, 3H); <sup>13</sup>C NMR (126 MHz, CDCl<sub>3</sub>) δ 153.1, 141.0, 140.9, 136.5, 136.2, 133.6, 131.9, 128.8, 128.5, 127.9, 127.8, 127.0, 122.0, 120.0, 118.2, 116.9, 112.4, 106.3, 25.2 (*B*-aryl carbon signal not observed); <sup>11</sup>B NMR (160 MHz, CDCl<sub>3</sub>) δ 29.0; IR (ATR) 3416, 3054, 2218, 1599, 1524, 1493, 1408, 1374, 1332, 1088, 820, 764, 692 cm<sup>-1</sup>; HRMS (DART) calcd for C<sub>28</sub>H<sub>23</sub>BN<sub>3</sub> ([M+H]<sup>+</sup>) 412.19795, found 412.19759.

### Synthesis of Compound **6d**

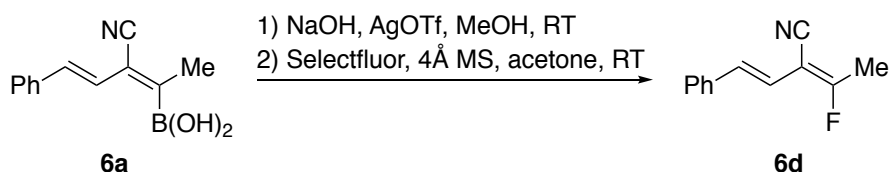

Under nitrogen to a 4-mL vial charged with a solution of NaOH (9.6 mg, 0.24 mmol, 1.2 equiv.) in MeOH (2.0 mL) was added **6a** (0.20 mmol, 1.0 equiv.) at room temperature. The resulting mixture was allowed to stir for 15 minutes, and then the mixture was cooled to 0 °C. AgOTf (154 mg, 0.600 mmol, 3.00 equiv.) was added in the absence of light, and the resulting mixture was allowed to stir for 30 minutes at 0 °C. Then, methanol was removed *in vacuo*, and anhydrous acetone (1 mL) was added and then removed under reduced pressure to help remove methanol. After repeating for four times, 4Å Molecular sieve (100 mg), Selectfluor (85 mg, 0.24 mmol, 1.2 equiv.), and acetone (2 mL) were added to the residue. The resulting slurry was allowed to stir for 2 hours at room temperature. At the conclusion of reaction, the mixture was passed through an acrodisc and washed with acetone. The filtrate was concentrated, dissolved in Et<sub>2</sub>O (5 mL) and further washed with H<sub>2</sub>O (5 mL). The organic layer was dried with Na<sub>2</sub>SO<sub>4</sub>, and **6d** was obtained via silica gel chromatography using hexanes/EtOAc (15/1) as the eluent as a white solid (67% yield).

<sup>1</sup>H NMR (500 MHz, CDCl<sub>3</sub>) δ 7.45 (d, *J* = 7.2 Hz, 2H), 7.35 (t, *J* = 7.4 Hz, 2H), 7.33 – 7.27 (m, 1H), 6.88 (s, 2H), 2.39 (d, *J* = 17.0 Hz, 3H); <sup>13</sup>C NMR (101 MHz, CDCl<sub>3</sub>) δ 168.7 (d, *J* = 280.5 Hz), 135.9 (d, *J* = 1.3 Hz), 132.7 (d, *J* = 4.2 Hz), 128.9, 128.8, 127.0, 115.6 (d, *J* = 3.6 Hz), 115.3 (d, *J* = 13.7 Hz), 98.8 (d, *J* = 28.6 Hz), 18.3 (d, *J* = 24.7 Hz); <sup>19</sup>F NMR (564 MHz, CDCl<sub>3</sub>) δ –75.6 (q, *J* = 17.0 Hz); IR (ATR) 3027, 2960, 2923, 2229, 1651, 1625, 1496, 1430, 1388, 1312, 1303, 1216, 1184, 1059, 1028, 953, 802, 688 cm<sup>-1</sup>; HRMS (DART) calcd for C<sub>12</sub>H<sub>11</sub>NF ([M+H]<sup>+</sup>) 188.08700, found 188.08652.

### Synthesis of Compound **6e** (eq1)

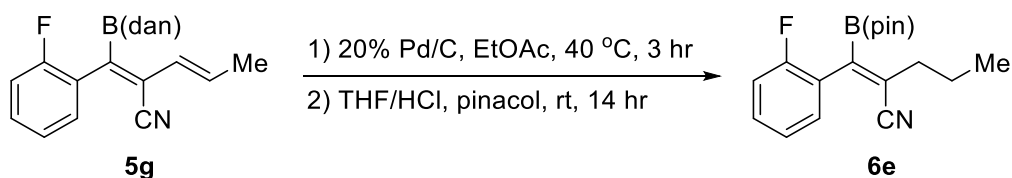

Palladium on carbon (12 mg, 0.011 mmol, 10% wt, 0.20 equiv.), **5g** (20 mg, 0.057 mmol, 1.0 equiv.), and EtOAc (0.60 mL) were added into a 4-mL vial. The vial was quickly placed under vacuum and then back filled with H<sub>2</sub> (1 atm) twice, and the mixture was allowed to heat at 40 °C for 3 hours under a H<sub>2</sub> balloon pressure. At the conclusion of reaction, the reaction mixture was passed through an acrodisc, and all volatiles were removed *in vacuo*. Pinacol (47 mg, 0.40 mmol, 7.0 equiv.) was added to this residue along with THF (1.5 mL) and aqueous HCl (0.75 mL, 4.3 M). The resulting mixture was allowed to stir for 14 hours at room temperature followed by addition of Et<sub>2</sub>O (5 mL) and H<sub>2</sub>O (5 mL). The organic layer was separated and the aqueous layer was further washed with Et<sub>2</sub>O (5 mL). The combined organic layers were concentrated, and the crude material was purified via silica gel chromatography using hexanes/EtOAc (8/1) as the eluent to afford **6e** as a white solid (54% yield).

<sup>1</sup>H NMR (500 MHz, CDCl<sub>3</sub>) δ 7.39 (td, *J* = 7.7, 1.8 Hz, 1H), 7.35 – 7.29 (m, 1H), 7.17 (td, *J* = 7.6, 1.1 Hz, 1H), 7.06 (ddd, *J* = 9.6, 8.3, 1.1 Hz, 1H), 2.68 – 2.61 (m, 2H), 1.71 (h, *J* = 7.4 Hz, 2H), 1.28 (s, 12H), 1.01 (t, *J* = 7.4 Hz, 3H); <sup>13</sup>C NMR (126 MHz, CDCl<sub>3</sub>) δ 159.6 (d, *J* = 246.5 Hz), 130.4, 130.4 (d, *J* = 10.6 Hz),

128.0, 127.5 (d,  $J = 15.1$  Hz), 124.4 (d,  $J = 3.4$  Hz), 118.4, 115.5 (d,  $J = 21.9$  Hz), 84.7, 36.0, 24.8, 22.3, 13.4 (*B*-alkenyl carbon signal not observed);  $^{11}\text{B}$  NMR (160 MHz,  $\text{CDCl}_3$ )  $\delta$  29.9;  $^{19}\text{F}$  NMR (470 MHz,  $\text{CDCl}_3$ )  $\delta$  -112.8 (m); IR (ATR) 2963, 2929, 2873, 2213, 1486, 1450, 1357, 1327, 1268, 1140, 1081, 971, 846, 753  $\text{cm}^{-1}$ ; HRMS (DART) calcd for  $\text{C}_{18}\text{H}_{24}\text{BNO}_2\text{F}$  ( $[\text{M}+\text{H}]^+$ ) 316.18786, found 316.18866.

## Synthesis of Satigrel (Scheme 5)

### Reaction sequence:

#### Step 1:

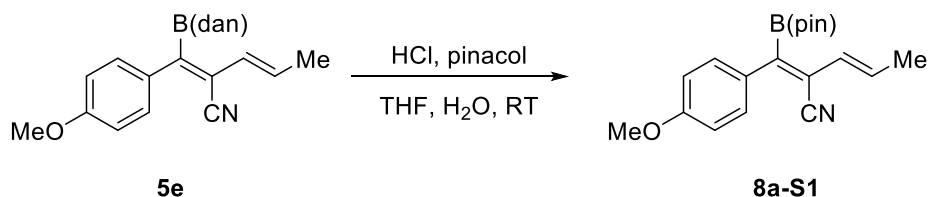

To a 20-mL vial charged with **5e** (146 mg, 0.400 mmol, 1.00 equiv.), pinacol (236 mg, 2.00 mmol, 5.00 equiv.) and THF (8 mL) was added followed by aqueous HCl (6.0 mL, 4.3 M). The resulting mixture was allowed to stir at room temperature for 20 hours. At the conclusion of reaction,  $\text{Et}_2\text{O}$  (4 mL) was added to the mixture, and the organic layer was separated. The aqueous layer was further extracted with additional  $\text{Et}_2\text{O}$  (5 mL). The combined organic layers were concentrated under reduce pressure, and the resulting crude material was further purified by silica gel chromatography using hexanes/ $\text{EtOAc}$  (5/1) as the eluent to afford **8a-S1** as a white solid (84% yield).

$^1\text{H}$  NMR (500 MHz,  $\text{CDCl}_3$ )  $\delta$  7.40 – 7.34 (m, 2H), 6.94 – 6.86 (m, 2H), 6.69 (dq,  $J = 15.4$ , 1.6 Hz, 1H), 6.38 (dq,  $J = 15.3$ , 6.8 Hz, 1H), 3.82 (s, 3H), 1.90 (dd,  $J = 6.8$ , 1.7 Hz, 3H), 1.33 (s, 12H);  $^{13}\text{C}$  NMR (126 MHz,  $\text{CDCl}_3$ )  $\delta$  159.9, 133.7, 131.4, 130.1, 127.9, 121.9, 116.9, 113.9, 84.8, 55.4, 24.9, 18.6 (*B*-alkenyl carbon signal not observed);  $^{11}\text{B}$  NMR (160 MHz,  $\text{CDCl}_3$ )  $\delta$  30.0; IR (ATR) 2978, 2934, 2838, 2218, 1604, 1509, 1357, 1328, 1291, 1250, 1178, 1137, 1032, 972, 849, 832, 732  $\text{cm}^{-1}$ ; HRMS (DART) calcd for  $\text{C}_{19}\text{H}_{25}\text{BNO}_3$  ( $[\text{M}+\text{H}]^+$ ) 326.19220, found 326.19142.

#### Step 2:

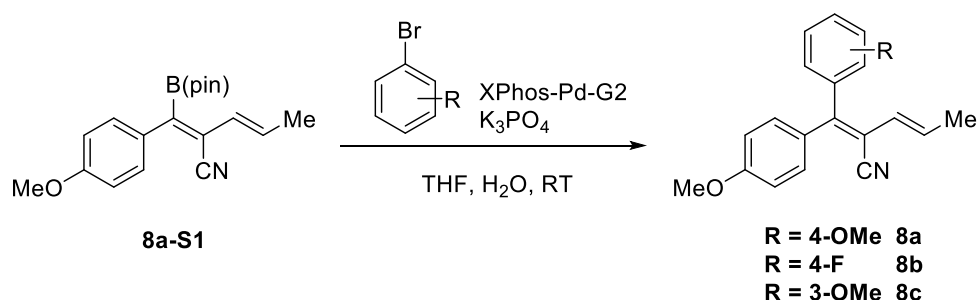

Under nitrogen to a 20-mL vial charged with **8a-S1** (109 mg, 0.330 mmol, 1.00 equiv.) and XPhos-Pd-G2 (13 mg, 0.016 mmol, 0.050 equiv.) was added THF (2.7 mL), aqueous  $\text{K}_3\text{PO}_4$  (0.9 mL, 0.6 M) and the corresponding aryl bromide (0.50 mmol, 1.5 equiv.). The resulting mixture was allowed to stir for 15 hours at room temperature. Then,  $\text{H}_2\text{O}$  (1 mL) was added and the organic layer was separated. The aqueous layer was further extracted with  $\text{Et}_2\text{O}$  (3 mL), and the organic layers were combined and concentrated. This crude material was purified by silica gel chromatography using hexanes/ $\text{EtOAc}$  (15/1) as the eluent to afford **8a-8c** as white solids.

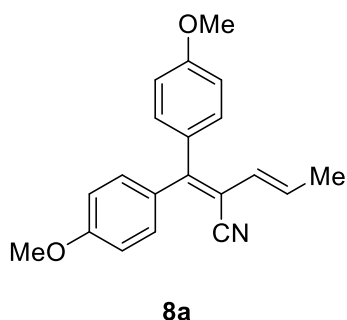

**8a** with 4-bromo-anisole, 88% yield.  $^1\text{H}$  NMR (500 MHz,  $\text{CDCl}_3$ )  $\delta$  7.33 – 7.28 (m, 2H), 7.13 – 7.07 (m, 2H), 6.93 – 6.85 (m, 4H), 6.32 (dq,  $J = 15.4, 6.6$  Hz, 1H), 6.21 (dq,  $J = 15.4, 1.5$  Hz, 1H), 3.85 (s, 3H), 3.84 (s, 3H), 1.82 (dd,  $J = 6.7, 1.5$  Hz, 3H);  $^{13}\text{C}$  NMR (126 MHz,  $\text{CDCl}_3$ )  $\delta$  160.7, 160.3, 153.3, 132.7, 132.1, 131.7, 131.4, 131.3, 126.6, 118.8, 113.8, 113.7, 108.8, 55.4, 55.4, 18.4; IR (ATR) 3005, 2930, 2838, 2214, 1602, 1573, 1506, 1461, 1442, 1302, 1282, 1247, 1172, 1029, 960, 829, 737, 603, 572  $\text{cm}^{-1}$ ; HRMS (DART) calcd for  $\text{C}_{20}\text{H}_{20}\text{NO}_2$  ( $[\text{M}+\text{H}]^+$ ) 306.14886, found 306.14963.

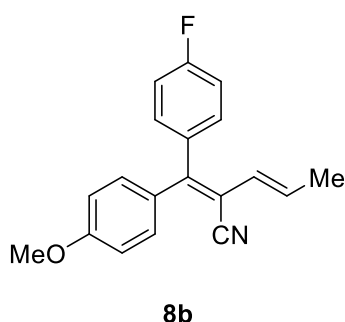

**8b** with 4-bromo-fluorobenzene, 80% yield.  $^1\text{H}$  NMR (500 MHz,  $\text{CDCl}_3$ )  $\delta$  7.35 – 7.27 (m, 2H), 7.15 (ddt,  $J = 8.2, 5.1, 2.5$  Hz, 2H), 7.12 – 7.04 (m, 2H), 6.92 – 6.84 (m, 2H), 6.35 (dq,  $J = 15.4, 6.8$  Hz, 1H), 6.10 (dq,  $J = 15.4, 1.6$  Hz, 1H), 3.83 (s, 3H), 1.82 (dd,  $J = 6.8, 1.6$  Hz, 3H);  $^{13}\text{C}$  NMR (126 MHz,  $\text{CDCl}_3$ )  $\delta$  163.1 (d,  $J = 249.9$  Hz), 160.9, 152.2, 135.2 (d,  $J = 3.4$  Hz), 132.5, 132.4, 132.2, 131.6, 126.2, 118.4, 115.6 (d,  $J = 21.5$  Hz), 113.9, 110.0, 55.5, 18.5;  $^{19}\text{F}$  NMR (470 MHz,  $\text{CDCl}_3$ )  $\delta$  -111.6 (ddd,  $J = 13.5, 8.4, 5.1$  Hz); IR (ATR) 2960, 2926, 2850, 2216, 1602, 1575, 1505, 1461, 1444, 1289, 1251, 1228, 1173, 1158, 1095, 1028, 960, 831, 804, 736, 566  $\text{cm}^{-1}$ ; HRMS (DART) calcd for  $\text{C}_{19}\text{H}_{16}\text{NOF}$  ( $[\text{M}+\text{H}]^+$ ) 293.12104, found 293.11995.

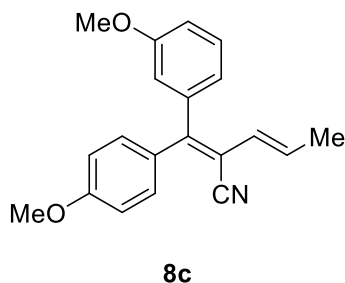

**8c** with 3-bromo-anisole, 90% yield.  $^1\text{H}$  NMR (600 MHz,  $\text{CDCl}_3$ )  $\delta$  7.35 – 7.24 (m, 3H), 6.93 (dd,  $J = 8.4, 2.5$  Hz, 1H), 6.91 – 6.84 (m, 2H), 6.76 (dt,  $J = 7.6, 1.2$  Hz, 1H), 6.68 (dd,  $J = 2.7, 1.5$  Hz, 1H), 6.38 – 6.25 (m, 1H), 6.15 (dq,  $J = 15.4, 1.5$  Hz, 1H), 3.83 (d,  $J = 0.9$  Hz, 3H), 3.78 (d,  $J = 0.9$  Hz, 3H), 1.81 (dt,  $J = 6.8, 1.2$  Hz, 3H);  $^{13}\text{C}$  NMR (151 MHz,  $\text{CDCl}_3$ )  $\delta$  160.7, 159.6, 153.2, 140.5, 132.2, 132.0, 131.5, 129.5, 126.4, 122.8, 118.5, 115.9, 114.5, 113.8, 109.9, 55.5, 55.5, 18.5; IR (ATR) 3004, 2935, 2913, 2837, 2216, 1604, 1576, 1509, 1462, 1446, 1287, 1253, 1178, 1034, 961, 837, 802, 787, 700  $\text{cm}^{-1}$ ; HRMS (DART) calcd for  $\text{C}_{20}\text{H}_{20}\text{NO}_2$  ( $[\text{M}+\text{H}]^+$ ) 306.14886, found 306.14950.

### Step 3:

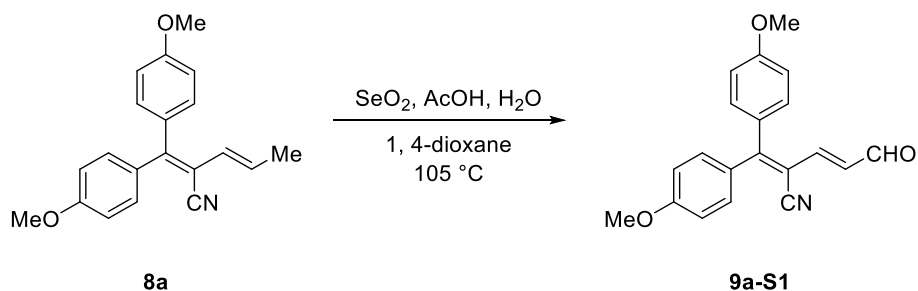

$\text{SeO}_2$  (162 mg, 1.45 mmol, 5.00 equiv.) and **8a** (89 mg, 0.29 mmol, 1.0 equiv.) were placed in a 20-mL vial. To this vial 1,4-dioxane (1.8 mL),  $\text{H}_2\text{O}$  (0.10 mL) and AcOH (0.050 mL) were added successively.



The resulting mixture was allowed to stir at 105 °C for 12 hours. Then, another portion of SeO<sub>2</sub> (64 mg, 0.58 mmol, 2.0 equiv.) was added, and the mixture was allowed to stir for another 12 hours at 105 °C. At the conclusion of reaction, the reaction mixture was passed through celite, and the filtrate was concentrated. This crude residue was purified by silica gel chromatography using hexanes/EtOAc (4/1) as the eluent to afford **9a-S1** as a yellow solid (77% yield).

<sup>1</sup>H NMR (500 MHz, CDCl<sub>3</sub>) δ 9.55 (d, *J* = 7.5 Hz, 1H), 7.46 – 7.36 (m, 2H), 7.25 (d, *J* = 15.5 Hz, 1H), 7.18 – 7.12 (m, 2H), 7.00 – 6.95 (m, 2H), 6.95 – 6.91 (m, 2H), 6.67 (dd, *J* = 15.5, 7.5 Hz, 1H), 3.89 (s, 3H), 3.87 (s, 3H); <sup>13</sup>C NMR (126 MHz, CDCl<sub>3</sub>) δ 192.6, 164.5, 162.4, 162.0, 147.1, 133.1, 132.9, 131.3, 131.0 (two signals), 130.1, 114.2, 114.0, 105.7, 55.6, 55.6; IR (ATR) 3007, 2934, 2839, 2730, 2214, 1672, 1593, 1573, 1501, 1253, 1171, 1116, 1027, 835, 732 cm<sup>-1</sup>; HRMS (DART) calcd for C<sub>20</sub>H<sub>18</sub>NO<sub>3</sub> ([M+H]<sup>+</sup>) 320.12812, found 320.12696.

Step 4:

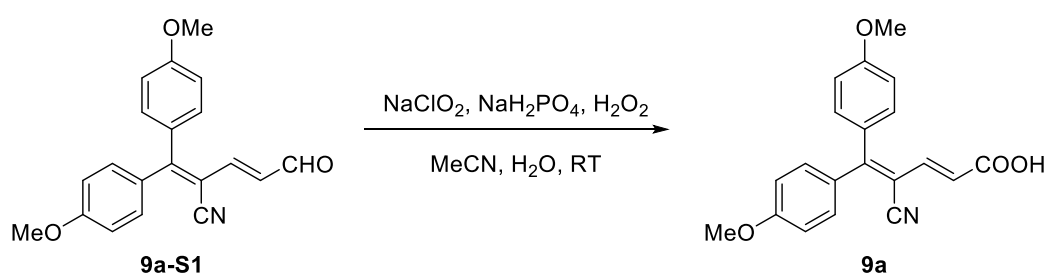

H<sub>2</sub>O (0.50 mL), MeCN (0.13 mL) and aqueous H<sub>2</sub>O<sub>2</sub> (35% v/v, 0.25 mmol, 25 μl, 2.0 equiv.) were added to a 4-mL vial charged with **9a-S1** (40.4 mg, 0.125 mmol, 1.00 equiv.) and NaH<sub>2</sub>PO<sub>4</sub> (7.8 mg, 0.065 mmol, 0.52 equiv.). The mixture was cooled to 0 °C and then a pre-cooled solution (0 °C) of NaClO<sub>2</sub> (35 mg, 0.31 mmol, 2.5 equiv.) in H<sub>2</sub>O (0.31 mL) was added in a dropwise fashion. The mixture was allowed to stir for 30 min and then allowed to warm to room temperature. At the conclusion of reaction, Et<sub>2</sub>O (5 mL) and H<sub>2</sub>O (3 mL) were added to this mixture. The organic layer was separated, and the concentrated organic layer was purified by silica gel chromatography using hexanes/EtOAc (1/1) as the eluent to afford **9a** as a yellow solid (69% yield).

<sup>1</sup>H NMR (500 MHz, CDCl<sub>3</sub>) δ 11.79 (s, br, 1H), 7.53 (d, *J* = 15.4 Hz, 1H), 7.41 – 7.35 (m, 2H), 7.14 – 7.07 (m, 2H), 6.98 – 6.88 (m, 4H), 6.42 (d, *J* = 15.5 Hz, 1H), 3.88 (s, 3H), 3.86 (s, 3H); <sup>13</sup>C NMR (126 MHz, CDCl<sub>3</sub>) δ 171.8, 164.0, 162.2, 161.9, 142.4, 133.2, 132.8, 131.6, 130.3, 120.6, 117.8, 114.2, 114.0, 105.5, 55.6, 55.6; IR (ATR) 2934, 2839, 2213, 1685, 1598, 1508, 1286, 1255, 1210, 1173, 1029, 836, 732 cm<sup>-1</sup>; HRMS (DART) calcd for C<sub>20</sub>H<sub>18</sub>NO<sub>4</sub> ([M+H]<sup>+</sup>) 336.12303, found 336.12345.

Step 5:

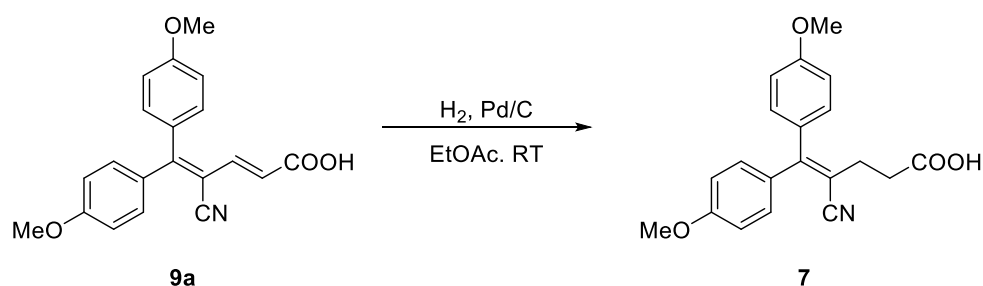

A 4-mL vial was charged with **9a** (10.2 mg, 0.0300 mmol, 1.00 equiv), Pd/C (3.1 mg, 0.0030 mmol, 10% wt, 0.10 equiv) and EtOAc (0.4 mL). The vial was quickly placed under vacuum and then and back filled with H<sub>2</sub> (1 atm) twice. The resulting mixture was allowed to stir at room temperature for 2 hours under a H<sub>2</sub> balloon pressure. At the conclusion of reaction, all volatiles were removed *in vacuo*, and the residue was purified by silica gel chromatography using EtOAc as the eluent to afford **7** as a white solid (91% yield, 97:3 hydrogenation selectivity (**7** vs. fully hydrogenated byproduct)).

<sup>1</sup>H NMR (600 MHz, CDCl<sub>3</sub>) δ 7.27 (d, *J* = 8.8 Hz, 2H), 7.07 – 7.01 (m, 2H), 6.92 – 6.83 (m, 4H), 3.83 (s, 3H), 3.82 (s, 3H), 2.71 (apparent s, 4H), (COOH signal not observed); <sup>13</sup>C NMR (151 MHz, CDCl<sub>3</sub>) δ 173.6 (br), 160.7, 160.3, 158.2, 132.4, 131.3, 131.1, 131.0, 120.0, 114.0, 113.8, 107.0, 55.5, 55.5, 32.8, 27.4; IR (ATR) 2931, 2839, 2204, 1709, 1605, 1509, 1283, 1249, 1174, 1030, 833 cm<sup>-1</sup>; HRMS (DART) calcd for C<sub>20</sub>H<sub>20</sub>NO<sub>4</sub> ([M+H]<sup>+</sup>) 338.13868, found 338.13898.

## Crystallographic Data for 4b, 4j-B(pin) and 5g

### Crystal Data for 4b:

|                                   |                                             |          |
|-----------------------------------|---------------------------------------------|----------|
| Identification code               | C26H20BN3                                   |          |
| Empirical formula                 | C26 H20 B N3                                |          |
| Formula weight                    | 385.26                                      |          |
| Temperature                       | 123(2) K                                    |          |
| Wavelength                        | 1.54178 Å                                   |          |
| Crystal system                    | Tetragonal                                  |          |
| Space group                       | P4 <sub>2</sub> /n                          |          |
| Unit cell dimensions              | a = 23.0525(5) Å                            | α = 90°. |
|                                   | b = 23.0525(5) Å                            | β = 90°. |
|                                   | c = 7.6338(2) Å                             | γ = 90°. |
| Volume                            | 4056.7(2) Å <sup>3</sup>                    |          |
| Z                                 | 8                                           |          |
| Density (calculated)              | 1.262 Mg/m <sup>3</sup>                     |          |
| Absorption coefficient            | 0.574 mm <sup>-1</sup>                      |          |
| F(000)                            | 1616                                        |          |
| Crystal size                      | 0.560 x 0.220 x 0.160 mm <sup>3</sup>       |          |
| Theta range for data collection   | 2.711 to 66.840°.                           |          |
| Index ranges                      | -27 ≤ h ≤ 22, -27 ≤ k ≤ 27, -9 ≤ l ≤ 9      |          |
| Reflections collected             | 22309                                       |          |
| Independent reflections           | 3569 [R(int) = 0.0276]                      |          |
| Completeness to theta = 66.840°   | 99.2 %                                      |          |
| Absorption correction             | Semi-empirical from equivalents             |          |
| Max. and min. transmission        | 0.7528 and 0.6580                           |          |
| Refinement method                 | Full-matrix least-squares on F <sup>2</sup> |          |
| Data / restraints / parameters    | 3569 / 2 / 278                              |          |
| Goodness-of-fit on F <sup>2</sup> | 1.060                                       |          |
| Final R indices [I > 2σ(I)]       | R1 = 0.0338, wR2 = 0.0869                   |          |
| R indices (all data)              | R1 = 0.0345, wR2 = 0.0874                   |          |
| Extinction coefficient            | n/a                                         |          |
| Largest diff. peak and hole       | 0.206 and -0.156 e.Å <sup>-3</sup>          |          |

**Crystal Data for 4j-B(pin):**

|                                   |                                                                                                                           |
|-----------------------------------|---------------------------------------------------------------------------------------------------------------------------|
| Identification code               | C21H26BNO4                                                                                                                |
| Empirical formula                 | C21 H26 B N O4                                                                                                            |
| Formula weight                    | 367.24                                                                                                                    |
| Temperature                       | 123(2) K                                                                                                                  |
| Wavelength                        | 1.54178 Å                                                                                                                 |
| Crystal system                    | Orthorhombic                                                                                                              |
| Space group                       | Fdd2                                                                                                                      |
| Unit cell dimensions              | a = 31.1427(6) Å $\alpha = 90^\circ$ .<br>b = 37.9695(8) Å $\beta = 90^\circ$ .<br>c = 13.9845(3) Å $\gamma = 90^\circ$ . |
| Volume                            | 16536.3(6) Å <sup>3</sup>                                                                                                 |
| Z                                 | 32                                                                                                                        |
| Density (calculated)              | 1.180 Mg/m <sup>3</sup>                                                                                                   |
| Absorption coefficient            | 0.645 mm <sup>-1</sup>                                                                                                    |
| F(000)                            | 6272                                                                                                                      |
| Crystal size                      | 0.580 x 0.280 x 0.150 mm <sup>3</sup>                                                                                     |
| Theta range for data collection   | 3.655 to 66.608°.                                                                                                         |
| Index ranges                      | -37 ≤ h ≤ 36, -41 ≤ k ≤ 45, -16 ≤ l ≤ 16                                                                                  |
| Reflections collected             | 30171                                                                                                                     |
| Independent reflections           | 7254 [R(int) = 0.0267]                                                                                                    |
| Completeness to theta = 66.608°   | 99.7 %                                                                                                                    |
| Absorption correction             | Semi-empirical from equivalents                                                                                           |
| Max. and min. transmission        | 0.7528 and 0.6531                                                                                                         |
| Refinement method                 | Full-matrix least-squares on F <sup>2</sup>                                                                               |
| Data / restraints / parameters    | 7254 / 571 / 575                                                                                                          |
| Goodness-of-fit on F <sup>2</sup> | 1.035                                                                                                                     |
| Final R indices [I > 2σ(I)]       | R1 = 0.0369, wR2 = 0.1073                                                                                                 |
| R indices (all data)              | R1 = 0.0383, wR2 = 0.1091                                                                                                 |
| Extinction coefficient            | n/a                                                                                                                       |
| Largest diff. peak and hole       | 0.258 and -0.215 e.Å <sup>-3</sup>                                                                                        |

### Crystal Data for 5g:

|                                   |                                                                                                                                                        |
|-----------------------------------|--------------------------------------------------------------------------------------------------------------------------------------------------------|
| Identification code               | C22H17BFN3                                                                                                                                             |
| Empirical formula                 | C22 H17 B F N3                                                                                                                                         |
| Formula weight                    | 353.19                                                                                                                                                 |
| Temperature                       | 173(2) K                                                                                                                                               |
| Wavelength                        | 1.54178 Å                                                                                                                                              |
| Crystal system                    | Monoclinic                                                                                                                                             |
| Space group                       | P2 <sub>1</sub> /n                                                                                                                                     |
| Unit cell dimensions              | a = 8.7227(4) Å                      α = 90°.<br>b = 7.3770(3) Å                      β = 98.3760(10)°.<br>c = 28.3779(11) Å                  γ = 90°. |
| Volume                            | 1806.57(13) Å <sup>3</sup>                                                                                                                             |
| Z                                 | 4                                                                                                                                                      |
| Density (calculated)              | 1.299 Mg/m <sup>3</sup>                                                                                                                                |
| Absorption coefficient            | 0.675 mm <sup>-1</sup>                                                                                                                                 |
| F(000)                            | 736                                                                                                                                                    |
| Crystal size                      | 0.420 x 0.280 x 0.260 mm <sup>3</sup>                                                                                                                  |
| Theta range for data collection   | 3.148 to 66.424°.                                                                                                                                      |
| Index ranges                      | -10 ≤ h ≤ 10, -8 ≤ k ≤ 8, -33 ≤ l ≤ 32                                                                                                                 |
| Reflections collected             | 19722                                                                                                                                                  |
| Independent reflections           | 3171 [R(int) = 0.0228]                                                                                                                                 |
| Completeness to theta = 66.424°   | 99.4 %                                                                                                                                                 |
| Absorption correction             | Semi-empirical from equivalents                                                                                                                        |
| Max. and min. transmission        | 0.7528 and 0.6787                                                                                                                                      |
| Refinement method                 | Full-matrix least-squares on F <sup>2</sup>                                                                                                            |
| Data / restraints / parameters    | 3171 / 2 / 251                                                                                                                                         |
| Goodness-of-fit on F <sup>2</sup> | 1.036                                                                                                                                                  |
| Final R indices [I > 2σ(I)]       | R1 = 0.0438, wR2 = 0.1190                                                                                                                              |
| R indices (all data)              | R1 = 0.0477, wR2 = 0.1236                                                                                                                              |
| Extinction coefficient            | n/a                                                                                                                                                    |
| Largest diff. peak and hole       | 0.733 and -0.331 e.Å <sup>-3</sup>                                                                                                                     |

# NMR Spectra Collection

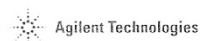

Sample Name:

Data Collected on:  
nmr18-vnmrs500

Archive directory:

Sample directory:

FidFile: yz-4-amide-H

Pulse Sequence: PROTON (s2pul)  
Solvent: cdcl3  
Data collected on: Dec 17 2019

Temp. 25.0 C / 298.1 K  
Operator: Liu

Relax. delay 10.000 sec  
Pulse 45.0 degrees  
Acq. time 2.045 sec  
Width 8012.8 Hz  
4 repetitions  
OBSERVE H1, 499.8760066 MHz  
DATA PROCESSING  
FT size 32768  
Total time 0 min 48 sec

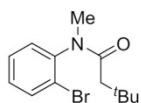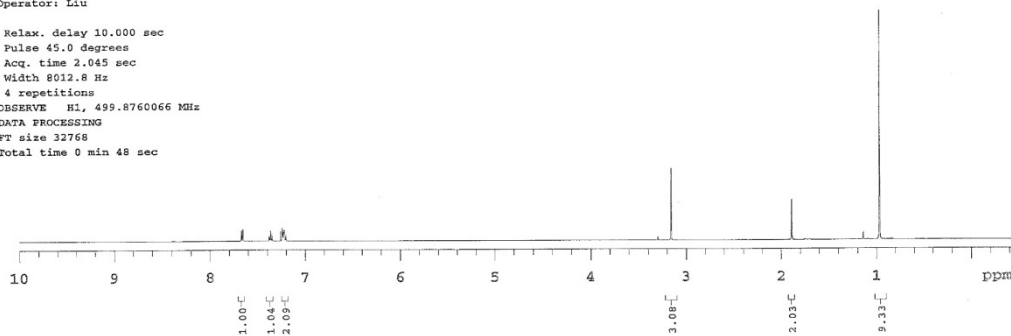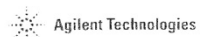

Sample Name:

Data Collected on:  
nmr18-vnmrs500

Archive directory:

Sample directory:

FidFile: yz-4-amide-C

Pulse Sequence: CARBON (s2pul)  
Solvent: cdcl3  
Data collected on: Feb 20 2020

Temp. 25.0 C / 298.1 K  
Operator: Liu

Relax. delay 1.000 sec  
Pulse 45.0 degrees  
Acq. time 1.049 sec  
Width 31250.0 Hz  
16 repetitions  
OBSERVE C13, 125.6939094 MHz  
DECOUPLE H1, 499.8785010 MHz  
Power 44 dB  
continuously on  
WALTZ-16 modulated  
DATA PROCESSING  
Line broadening 0.5 Hz  
FT size 65536  
Total time 34 min

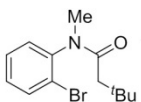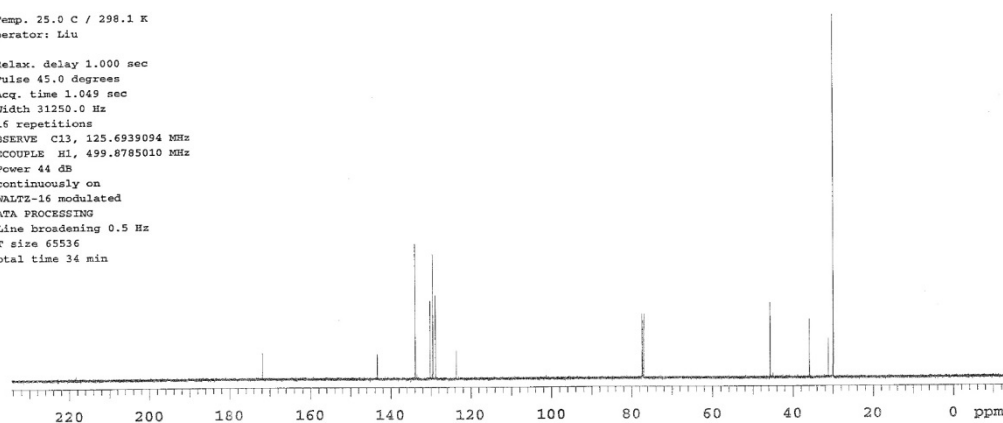

Sample Name:

Data Collected on:  
nmr19-vmrs600  
Archive directory:

Sample directory:

FidFile: PROTON

Pulse Sequence: PROTON (s2pul)  
Solvent: cdcl3  
Data collected on: Dec 19 2019

Temp. 25.0 C / 298.1 K  
Operator: Liu

Relax. delay 10.000 sec  
Pulse 45.0 degrees  
Acq. time 1.704 sec  
Width 9615.4 Hz  
5 repetitions  
OBSERVE H1, 599.6806841 MHz  
DATA PROCESSING  
FT size 32768  
Total time 1 min 57 sec

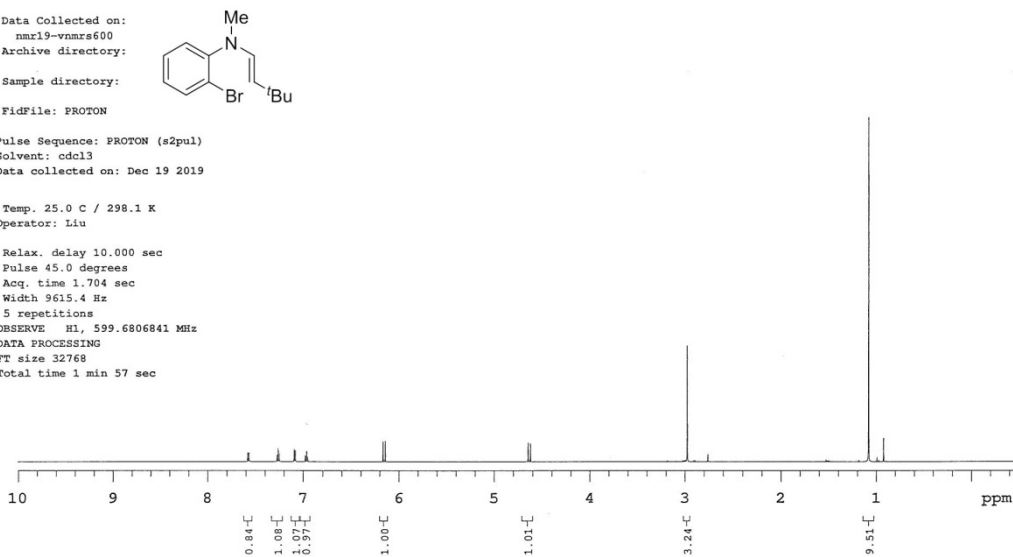

Sample Name:

Data Collected on:  
nmr19-vmrs600  
Archive directory:

Sample directory:

FidFile: CARBON

Pulse Sequence: CARBON (s2pul)  
Solvent: cdcl3  
Data collected on: Dec 19 2019

Temp. 25.0 C / 298.1 K  
Operator: Liu

Relax. delay 1.000 sec  
Pulse 45.0 degrees  
Acq. time 0.865 sec  
Width 37878.8 Hz  
208 repetitions  
OBSERVE C13, 150.7898050 MHz  
DECOUPLE H1, 599.6836825 MHz  
Power 45 dB  
continuously on  
WALTZ-16 modulated  
DATA PROCESSING  
Line broadening 0.5 Hz  
FT size 65536  
Total time 31 min

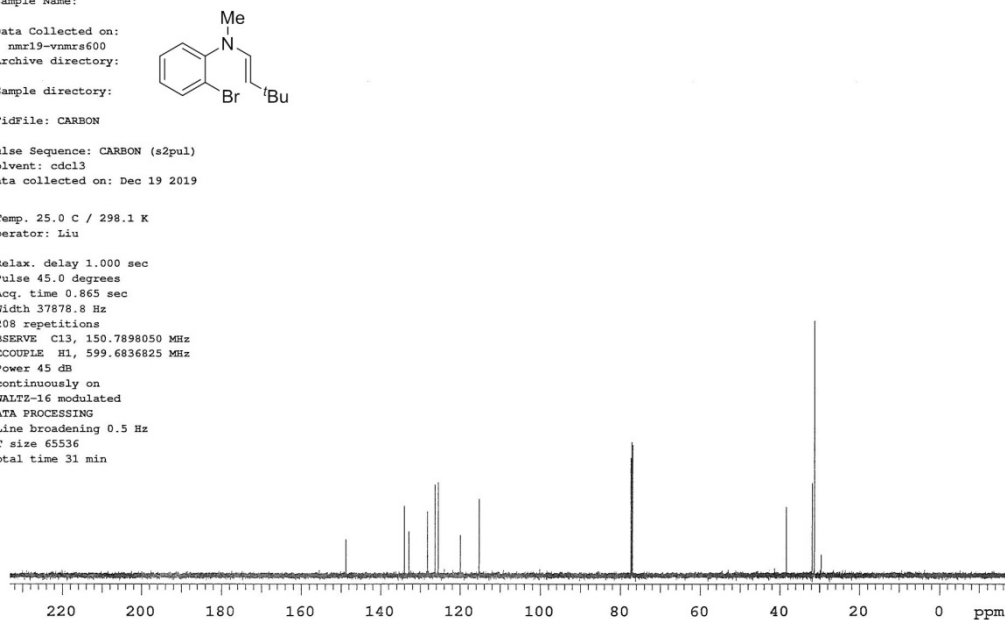

Sample Name:  
 Data Collected on: mmr18-vnmrs500  
 Archive directory:  
 Sample directory:  
 Fidfile: PROTON

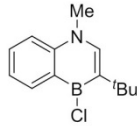

Pulse Sequence: PROTON (s2pul)  
 Solvent: cdcl3  
 Data collected on: Dec 23 2019

Temp. 25.0 C / 298.1 K  
 Operator: Liu

Relax. delay 10.000 sec  
 Pulse 45.0 degrees  
 Acq. time 2.045 sec  
 Width 8012.8 Hz  
 4 repetitions  
 OBSERVE H1, 499.8760066 MHz  
 DATA PROCESSING  
 FT size 32768  
 Total time 0 min 48 sec

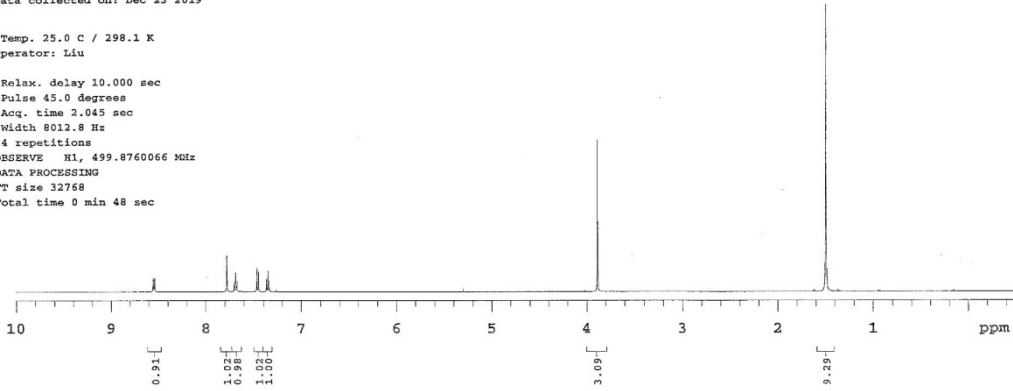

Sample Name:  
 Data Collected on: mmr18-vnmrs500  
 Archive directory:  
 Sample directory:  
 Fidfile: CARBON

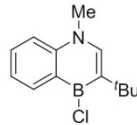

Pulse Sequence: CARBON (s2pul)  
 Solvent: cdcl3  
 Data collected on: Dec 23 2019

Temp. 25.0 C / 298.1 K  
 Operator: Liu

Relax. delay 1.000 sec  
 Pulse 45.0 degrees  
 Acq. time 1.049 sec  
 Width 31250.0 Hz  
 764 repetitions  
 OBSERVE C13, 125.6939104 MHz  
 DECOUPLE H1, 499.8785010 MHz  
 Power 44 dB  
 continuously on  
 WALTZ-16 modulated  
 DATA PROCESSING  
 Line broadening 1.0 Hz  
 FT size 65536  
 Total time 34 min

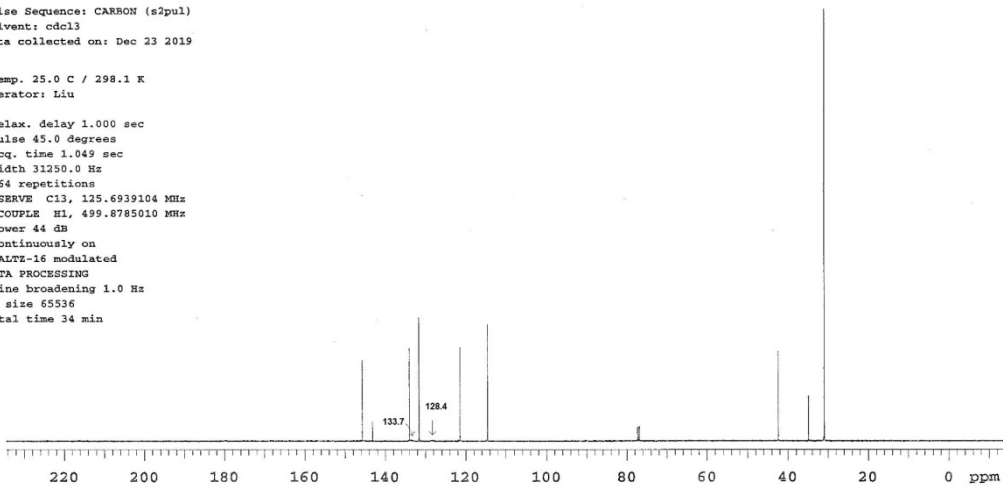



Sample Name:

Data Collected on:  
nmr11-inova500

Archive directory:

Sample directory:

FidFile: B11

Pulse Sequence: s2pul

Solvent: cdcl3

Data collected on: Dec 23 2019

Temp. 25.0 C / 298.1 K  
Operator: Liu

Relax. delay 0.010 sec

Pulse 45.0 degrees

Acq. time 0.054 sec

Width 32064.1 Hz

1000 repetitions

OBSERVE B11, 160.3467851 MHz

DATA PROCESSING

Line broadening 0.5 Hz

FT size 4096

Total time 1 min 23 sec

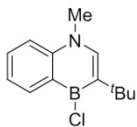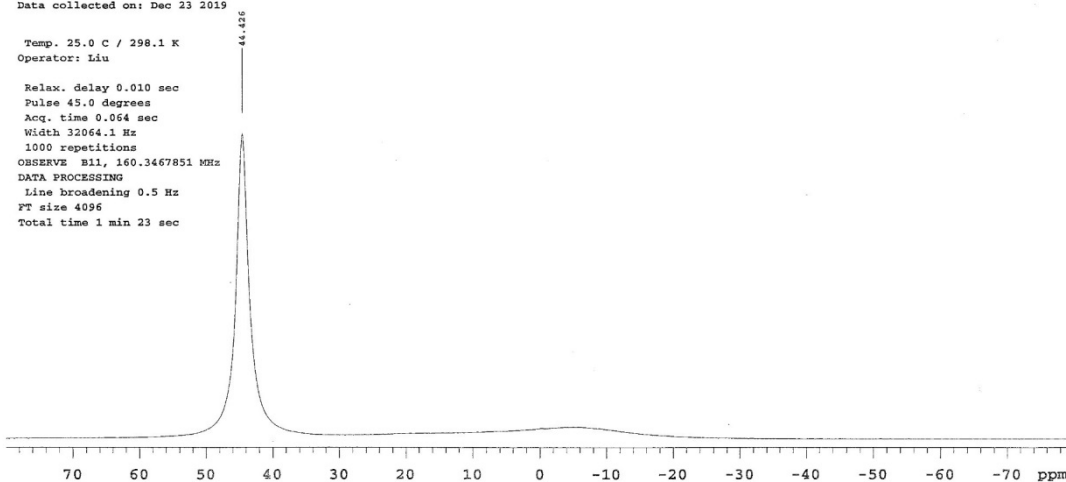

Me

Sample Name:

Data Collected on:

nmr18-vnmrs500

Archive directory:

Sample directory:

FidFile: PROTON

Pulse Sequence: PROTON (s2pul)

Solvent: cdcl3

Data collected on: Aug 17 2019

Temp. 25.0 C / 298.1 K

Operator: Liu

Relax. delay 10.000 sec

Pulse 45.0 degrees

Acq. time 2.045 sec

Width 8012.8 Hz

5 repetitions

OBSERVE H1, 499.8762780 MHz

DATA PROCESSING

FT size 32768

Total time 1 min 36 sec

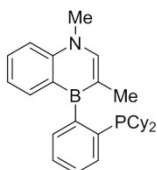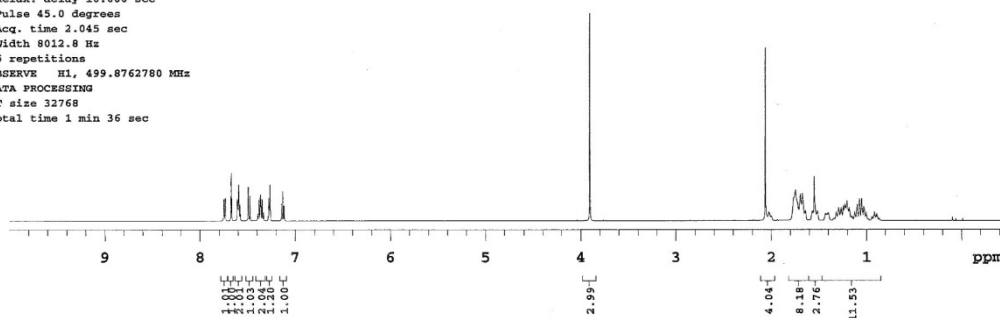

Sample Name:  
 Data Collected on:  
 nmr18-nmrs500  
 Archive directory:  
 Sample directory:  
 FidFile: yz-ligand-MePcy-C  
 Pulse Sequence: CARBON (s2pul)  
 Solvent: cdcl3  
 Data collected on: Aug 17 2019  
 Temp. 25.0 C / 298.1 K  
 Operator: Liu

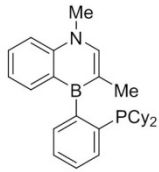

Relax. delay 1.000 sec  
 Pulse 45.0 degrees  
 Acq. time 1.049 sec  
 Width 31250.0 Hz  
 560 repetitions  
 OBSERVE C13, 125.6939734 MHz  
 DECOUPLE H1, 499.8787746 MHz  
 Power 45 dB  
 continuously on  
 WALTZ-16 modulated  
 DATA PROCESSING  
 Line broadening 0.5 Hz  
 FT size 65536  
 Total time 34 min

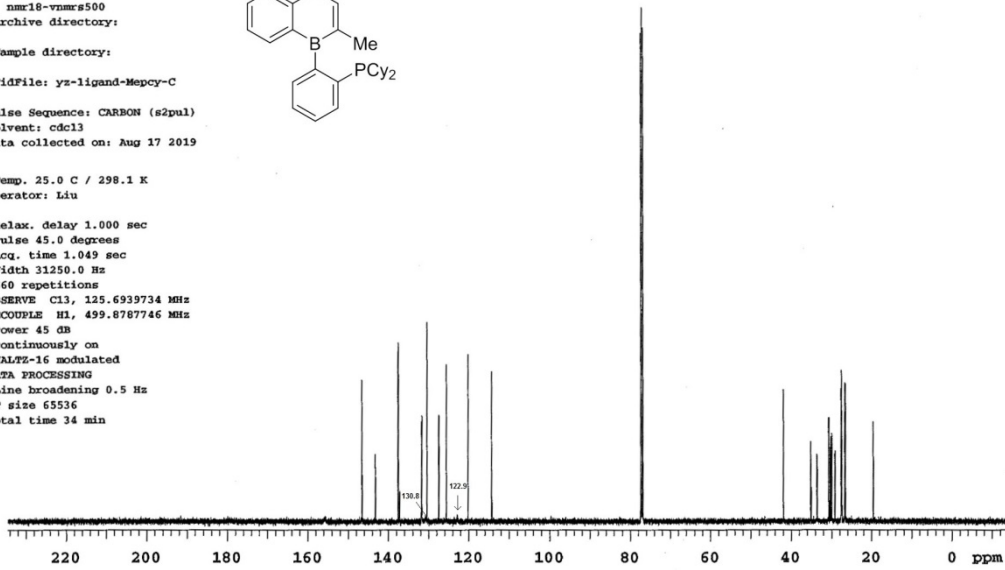

Me

Sample Name:  
 Data Collected on:  
 nmr11-inova500  
 Archive directory:  
 Sample directory:  
 FidFile: yz-ligand-MePcy-B  
 Pulse Sequence: s2pul  
 Solvent: cdcl3  
 Data collected on: Aug 17 2019  
 Temp. 25.0 C / 298.1 K  
 Operator: Liu

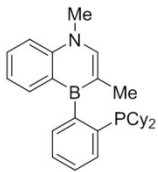

Agilent Technologies

Relax. delay 0.010 sec  
 Pulse 45.0 degrees  
 Acq. time 0.064 sec  
 Width 32064.1 Hz  
 1000 repetitions  
 OBSERVE H1, 160.3467538 MHz  
 DECOUPLE H1, 499.7745112 MHz  
 Power 44 dB  
 on during acquisition  
 off during delay  
 WALTZ-16 modulated  
 DATA PROCESSING  
 Line broadening 0.5 Hz  
 FT size 4096  
 Total time 1 min 23 sec

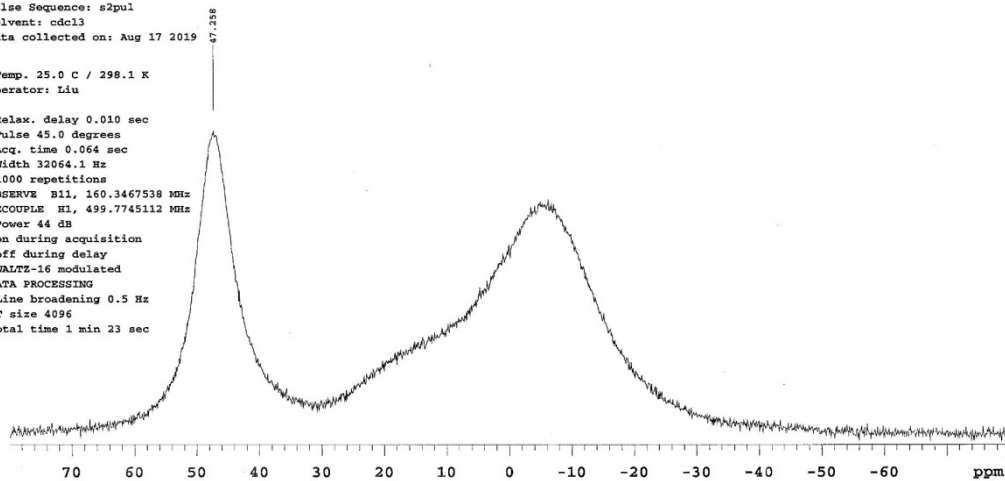

Me

Sample Name:

Data Collected on:  
nmr18-vnmrs500

Archive directory:

Sample directory:

FidFile: PHOSPHORUS

Pulse Sequence: PHOSPHORUS (s2pul)  
Solvent: cdcl3  
Data collected on: Aug 17 2019

Temp. 25.0 C / 298.1 K  
Operator: Liu

Relax. delay 1.000 sec  
Pulse 45.0 degrees  
Acq. time 0.655 sec  
Width 50000.0 Hz  
10 repetitions  
OBSERVE P31, 202.3535018 MHz  
DECOUPLE H1, 499.8787746 MHz  
Power 45 dB  
on during acquisition  
off during delay  
WALTZ-16 modulated  
DATA PROCESSING  
Line broadening 0.5 Hz  
FT size 65536  
Total time 0 min 17 sec

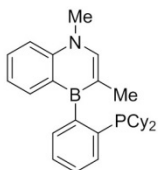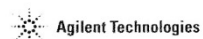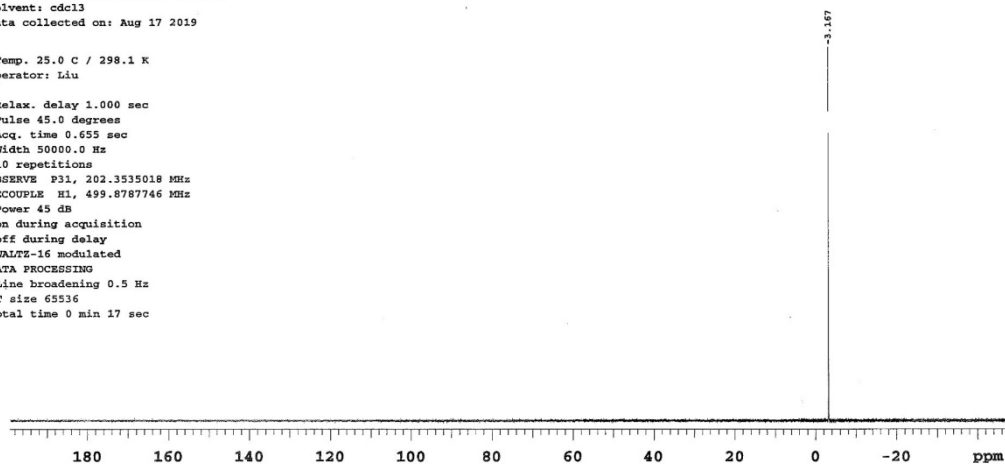

Et

Sample Name:

Data Collected on:  
nmr18-vnmrs500

Archive directory:

Sample directory:

FidFile: yz-ligand-Etpcy-H

Pulse Sequence: PROTON (s2pul)  
Solvent: cdcl3  
Data collected on: Aug 17 2019

Temp. 25.0 C / 298.1 K  
Operator: Liu

Relax. delay 10.000 sec  
Pulse 45.0 degrees  
Acq. time 2.045 sec  
Width 8012.8 Hz  
8 repetitions  
OBSERVE H1, 499.8762807 MHz  
DATA PROCESSING  
FT size 32768  
Total time 2 min 0 sec

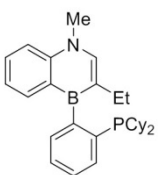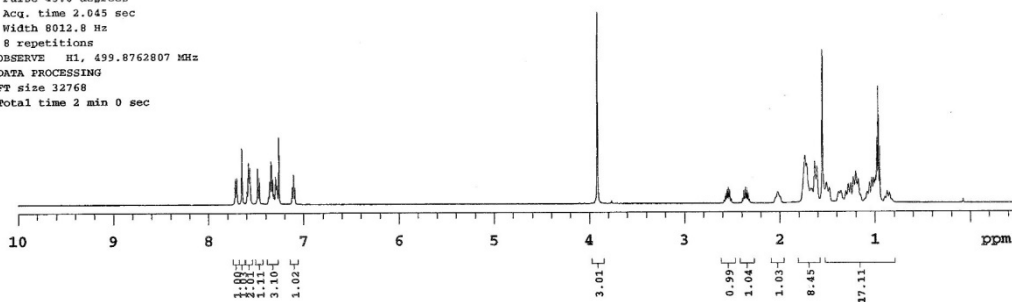

Sample Name:  
 Data Collected on:  
 nmr14-vnmrs400  
 Archive directory:  
 Sample directory:  
 Fidfile: CARBON  
 Pulse Sequence: CARBON (s2pul)  
 Solvent: cdcl3  
 Data collected on: Aug 17 2019

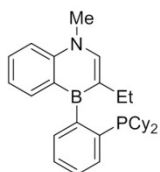

Temp. 25.0 C / 298.1 K  
 Operator: Liu

Relax. delay 1.000 sec  
 Pulse 45.0 degrees  
 Acq. time 1.311 sec  
 Width 25000.0 Hz  
 4256 repetitions  
 OBSERVE C13, 100.5208748 MHz  
 DECOUPLE H1, 399.7666112 MHz  
 Power 40 dB  
 continuously on  
 WALTZ-16 modulated  
 DATA PROCESSING  
 Line broadening 0.5 Hz  
 FT size 65536  
 Total time 6 hr, 25 min

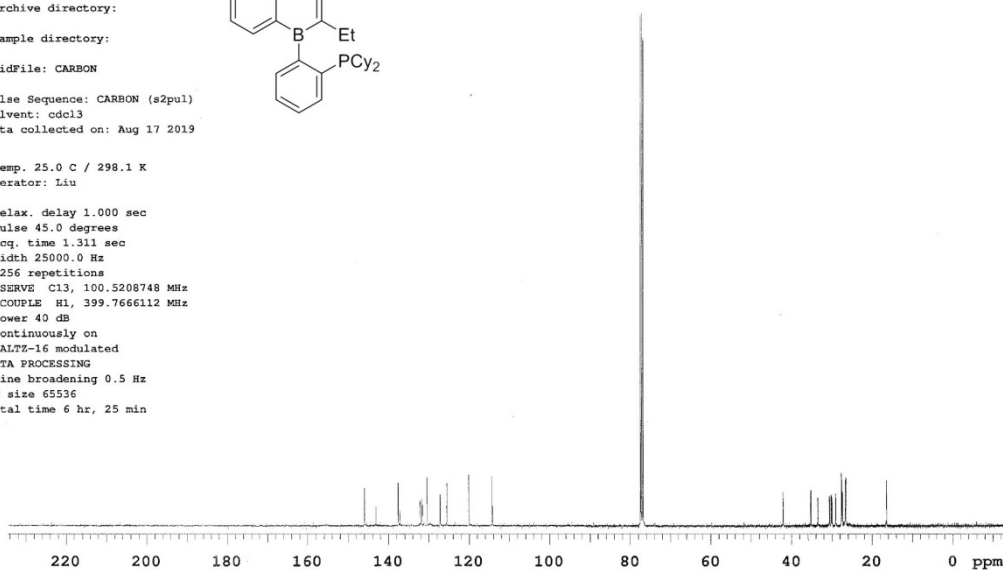

Et

Sample Name:  
 Data Collected on:  
 nmrl1-inova500  
 Archive directory:  
 Sample directory:  
 Fidfile: B11  
 Pulse Sequence: s2pul  
 Solvent: cdcl3  
 Data collected on: Aug 17 2019

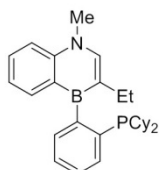

Temp. 25.0 C / 298.1 K  
 Operator: Liu

Relax. delay 0.010 sec  
 Pulse 45.0 degrees  
 Acq. time 0.064 sec  
 Width 32064.1 Hz  
 3106 repetitions  
 OBSERVE B11, 160.3467538 MHz  
 DECOUPLE H1, 499.7745112 MHz  
 Power 44 dB  
 on during acquisition  
 off during delay  
 WALTZ-16 modulated  
 DATA PROCESSING  
 Line broadening 0.5 Hz  
 FT size 4096  
 Total time 13 min

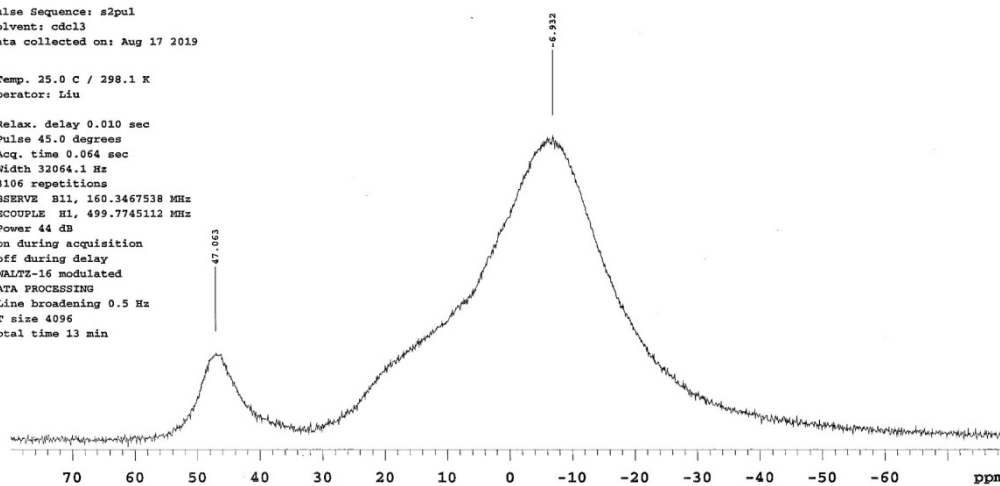

Et

Sample Name:

Data Collected on:  
nmr18-vnmrs500

Archive directory:

Sample directory:

FidFile: PHOSPHORUS

Pulse Sequence: PHOSPHORUS (s2pul)  
Solvent: cdcl3  
Data collected on: Aug 17 2019

Temp. 25.0 C / 298.1 K  
Operator: Liu

Relax. delay 1.000 sec  
Pulse 45.0 degrees  
Acq. time 0.655 sec  
Width 50000.0 Hz  
80 repetitions  
OBSERVE F31, 202.3535018 MHz  
DECOUPLE H1, 499.8787746 MHz  
Power 45 dB  
on during acquisition  
off during delay  
WALTZ-16 modulated  
DATA PROCESSING  
Line broadening 0.5 Hz  
FT size 65536  
Total time 2 min 46 sec

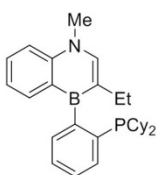

Agilent Technologies

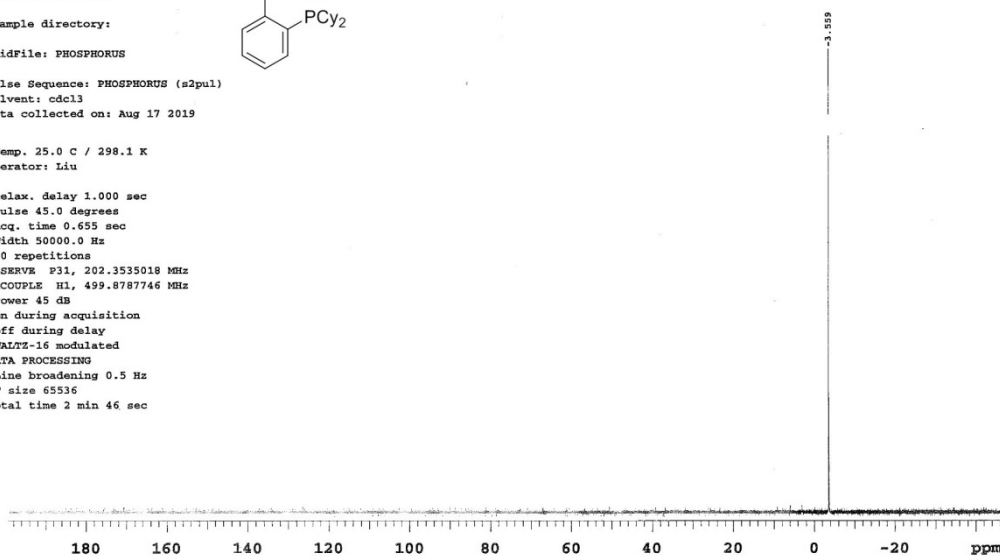

ipr

Sample Name:

Data Collected on:  
nmr18-vnmrs500

Archive directory:

Sample directory:

FidFile: PROTON

Pulse Sequence: PROTON (s2pul)  
Solvent: cdcl3  
Data collected on: Aug 7 2019

Temp. 25.0 C / 298.1 K  
Operator: Liu

Relax. delay 10.000 sec  
Pulse 45.0 degrees  
Acq. time 2.045 sec  
Width 8012.8 Hz  
8 repetitions  
OBSERVE H1, 499.8762802 MHz  
DATA PROCESSING  
FT size 32768  
Total time 1 min 36 sec

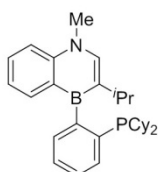

Agilent Technologies

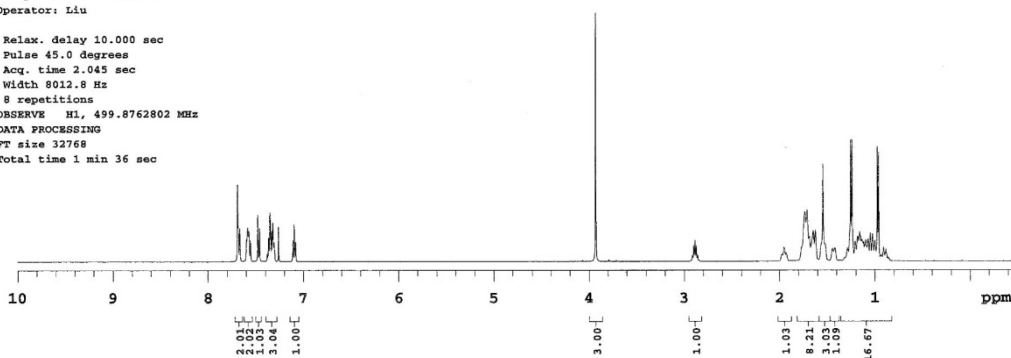

Sample Name:  
 Data Collected on:  
 nmrl8-vnmrs500  
 Archive directory:  
 Sample directory:  
 FidFile: CARBON  
 Pulse Sequence: CARBON (s2pul)  
 Solvent: cdcl3  
 Data collected on: Aug 8 2019

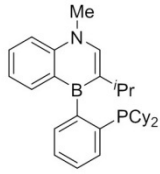

Temp. 25.0 C / 298.1 K  
 Operator: Liu  
 Relax. delay 1.000 sec  
 Pulse 45.0 degrees  
 Acq. time 1.049 sec  
 Width 31250.0 Hz  
 444 repetitions  
 OBSERVE C13, 125.6939753 MHz  
 DECOUPLE H1, 499.8787746 MHz  
 Power 43 dB  
 continuously on  
 WALTZ-16 modulated  
 DATA PROCESSING  
 Line broadening 0.5 Hz  
 FT size 65536  
 Total time 34 min

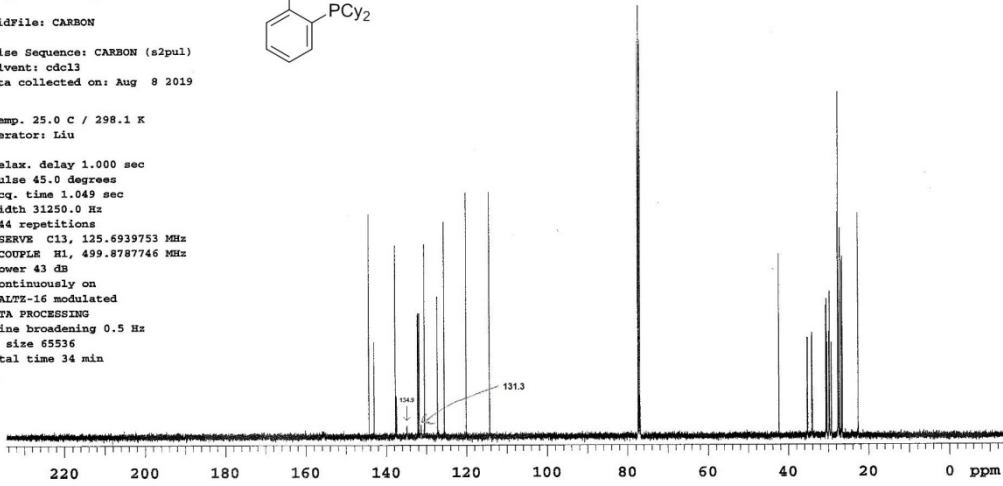

ipr

Sample Name:  
 Data Collected on:  
 nmrl1-inova500  
 Archive directory:  
 Sample directory:  
 FidFile: B11  
 Pulse Sequence: s2pul  
 Solvent: cdcl3  
 Data collected on: Aug 19 2019

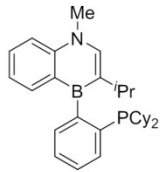

Temp. 25.0 C / 298.1 K  
 Operator: Liu  
 Relax. delay 0.010 sec  
 Pulse 45.0 degrees  
 Acq. time 0.064 sec  
 Width 32064.1 Hz  
 5034 repetitions  
 OBSERVE B11, 160.3467538 MHz  
 DATA PROCESSING  
 Line broadening 0.5 Hz  
 FT size 4096  
 Total time 13 min

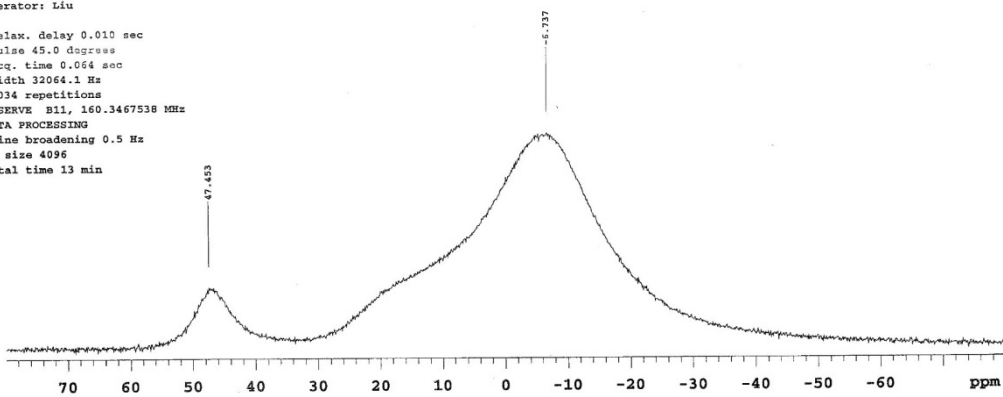

## STANDARD PHOSPHORUS PARAMETERS

Sample Name:

Data Collected on:  
nmr18-vnmrs500  
Archive directory:

Sample directory:

Fidfile: PHOSPHORUS

Pulse Sequence: PHOSPHORUS (s2pul)  
Solvent: cdcl3  
Data collected on: Aug 19 2019Temp. 25.0 C / 298.1 K  
Operator: LiuRelax. delay 1.000 sec  
Pulse 45.0 degrees  
Acq. time 0.655 sec  
Width 50000.0 Hz  
86 repetitions  
OBSERVE F31, 202.3534957 MHz  
DECOUPLE H1, 499.8787746 MHz  
Power 45 dB  
on during acquisition  
off during delay  
WALTZ-16 modulated  
DATA PROCESSING  
Line broadening 0.5 Hz  
FT size 65536  
Total time 2 min 46 sec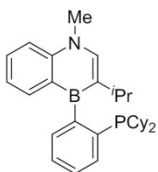
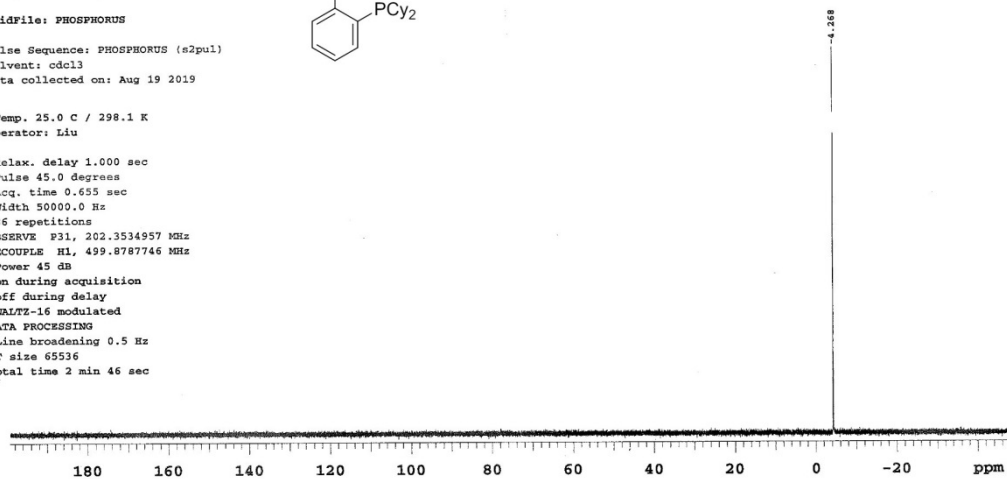

Sample Name:

Data Collected on:  
nmr19-vnmrs600  
Archive directory:

Sample directory:

Fidfile: PROTON

Pulse Sequence: PROTON (s2pul)  
Solvent: cdcl3  
Data collected on: Sep 7 2019Temp. 25.0 C / 298.1 K  
Operator: LiuRelax. delay 10.000 sec  
Pulse 45.0 degrees  
Acq. time 1.704 sec  
Width 9615.4 Hz  
10 repetitions  
OBSERVE H1, 599.6806838 MHz  
DATA PROCESSING  
FT size 32768  
Total time 1 min 57 sec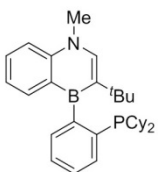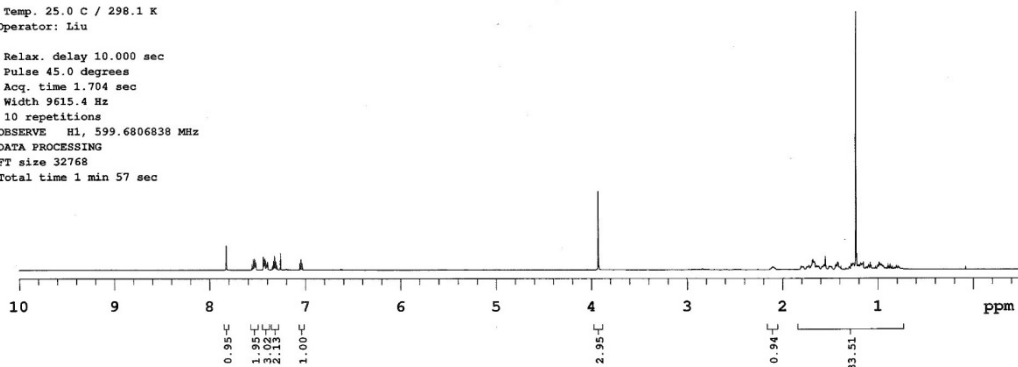

Sample Name:  
 Data Collected on: nmr18-vnmrs500  
 Archive directory:  
 Sample directory:  
 FidFile: CARBON  
 Pulse Sequence: CARBON (s2pul)  
 Solvent: cdcl3  
 Data collected on: Aug 7 2019

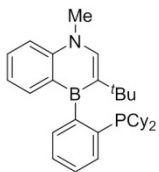

Temp. 25.0 C / 298.1 K  
 Operator: Liu

Relax. delay 1.000 sec  
 Pulse 45.0 degrees  
 Acq. time 1.049 sec  
 Width 31250.0 Hz  
 186 repetitions  
 OBSERVE C13, 125.6939749 MHz  
 DECOUPLE H1, 499.8787746 MHz  
 Power 43 dB  
 continuously on  
 WALTZ-16 modulated  
 DATA PROCESSING  
 Line broadening 0.5 Hz  
 FT size 65536  
 Total time 34 min

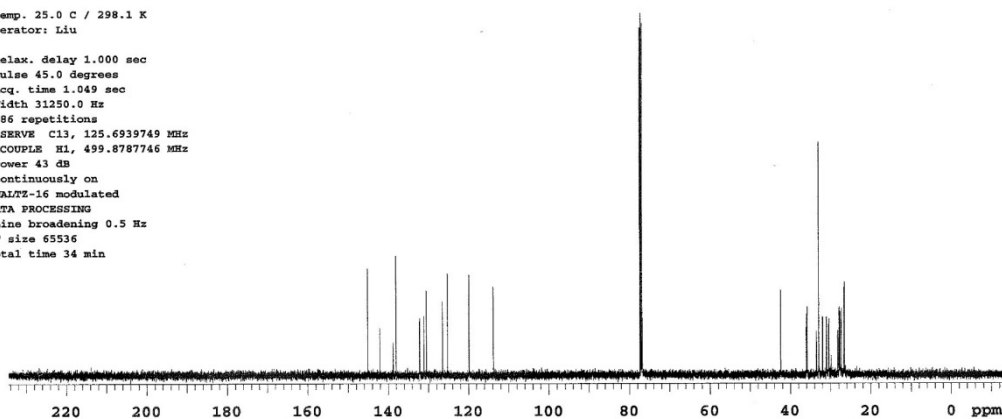

STANDARD PROTON PARAMETERS

Sample Name:  
 Data Collected on: nmr11-inova500  
 Archive directory:  
 Sample directory:  
 FidFile: B11  
 Pulse Sequence: s2pul  
 Solvent: cdcl3  
 Data collected on: Sep 7 2019

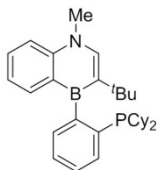

Temp. 25.0 C / 298.1 K  
 Operator: Liu

Relax. delay 0.010 sec  
 Pulse 45.0 degrees  
 Acq. time 0.054 sec  
 Width 32064.1 Hz  
 1018 repetitions  
 OBSERVE B11, 160.3467695 MHz  
 DATA PROCESSING  
 Line broadening 0.5 Hz  
 FT size 4096  
 Total time 2 min 46 sec

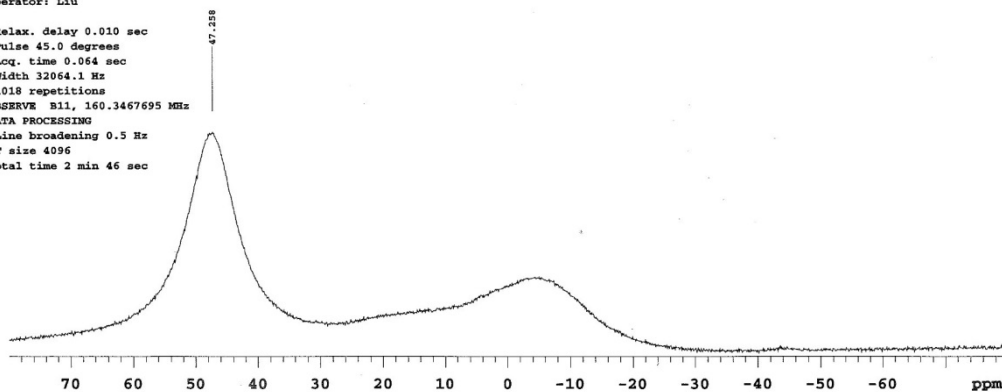



## STANDARD PHOSPHORUS PARAMETERS

Sample Name:

Data Collected on:  
nmr18-nmrs500

Archive directory:

Sample directory:

FidFile: PHOSPHORUS

Pulse Sequence: PHOSPHORUS (s2pul)  
Solvent: cdcl3  
Data collected on: Sep 7 2019Temp. 25.0 C / 298.1 K  
Operator: LiuRelax. delay 1.000 sec  
Pulse 45.0 degrees  
Acq. time 0.655 sec  
Width 50000.0 Hz  
Single scan  
OBSERVE F31, 202.3535079 MHz  
DECOUPLE H1, 499.8787746 MHz  
Power 45 dB  
on during acquisition  
off during delay  
WALTZ-16 modulated  
DATA PROCESSING  
Line broadening 0.5 Hz  
FT size 65536  
Total time 0 min 2 sec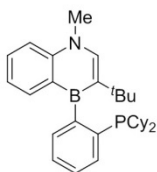
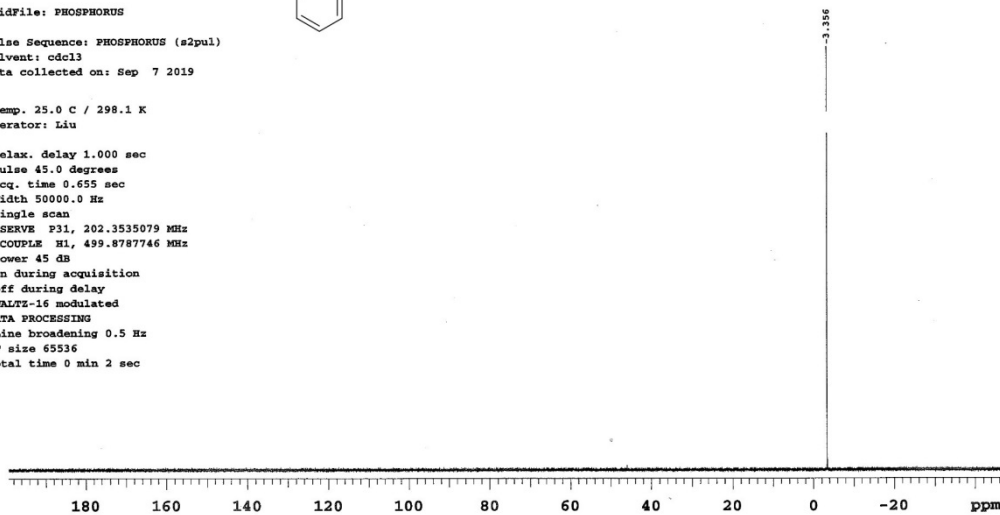

Sample Name:

Data Collected on:  
nmr18-nmrs500

Archive directory:

Sample directory:

FidFile: PROTON

Pulse Sequence: PROTON (s2pul)  
Solvent: cdcl3  
Data collected on: Dec 17 2019Temp. 25.0 C / 298.1 K  
Operator: LiuRelax. delay 10.000 sec  
Pulse 45.0 degrees  
Acq. time 2.045 sec  
Width 8012.8 Hz  
4 repetitions  
OBSERVE H1, 499.8760068 MHz  
DATA PROCESSING  
FT size 32768  
Total time 0 min 48 sec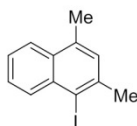
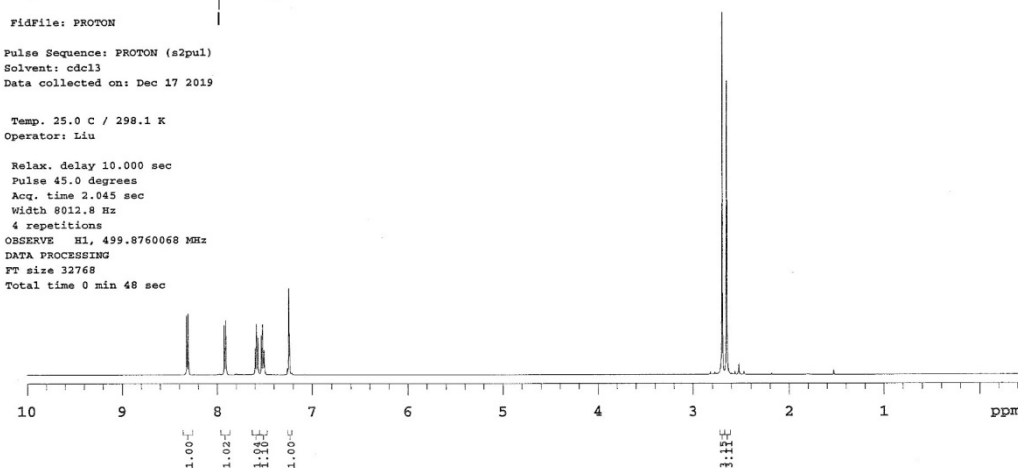

Sample Name:  
 Data Collected on:  
 nmr18-vmrs500  
 Archive directory:  
 Sample directory:  
 FidFile: CARBON

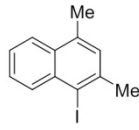

Pulse Sequence: CARBON (s2pul)  
 Solvent: cdcl3  
 Data collected on: Dec 17 2019

Temp. 25.0 C / 298.1 K  
 Operator: Liu

Relax. delay 1.000 sec  
 Pulse 45.0 degrees  
 Acq. time 1.049 sec  
 Width 31250.0 Hz  
 168 repetitions  
 OBSERVE C13, 125.6939161 MHz  
 DECOUPLE H1, 499.8785010 MHz  
 Power 44 dB  
 continuously on  
 WALTZ-16 modulated  
 DATA PROCESSING  
 Line broadening 0.5 Hz  
 FT size 65536  
 Total time 34 min

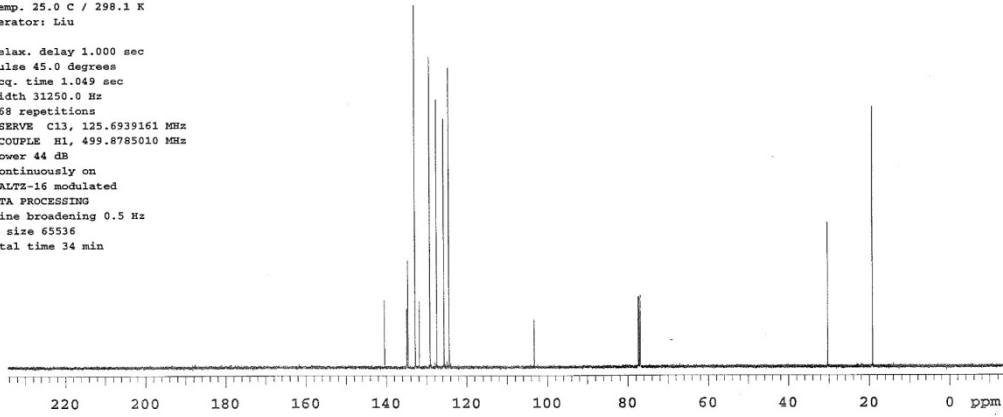

Sample Name:  
 Data Collected on:  
 nmr18-vmrs500  
 Archive directory:  
 Sample directory:  
 FidFile: PROTON

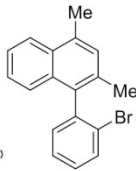

Pulse Sequence: PROTON (s2pul)  
 Solvent: cdcl3  
 Data collected on: Dec 19 2019

Temp. 25.0 C / 298.1 K  
 Operator: Liu

Relax. delay 10.000 sec  
 Pulse 45.0 degrees  
 Acq. time 2.045 sec  
 Width 8012.8 Hz  
 6 repetitions  
 OBSERVE H1, 499.8760066 MHz  
 DATA PROCESSING  
 FT size 32768  
 Total time 1 min 12 sec

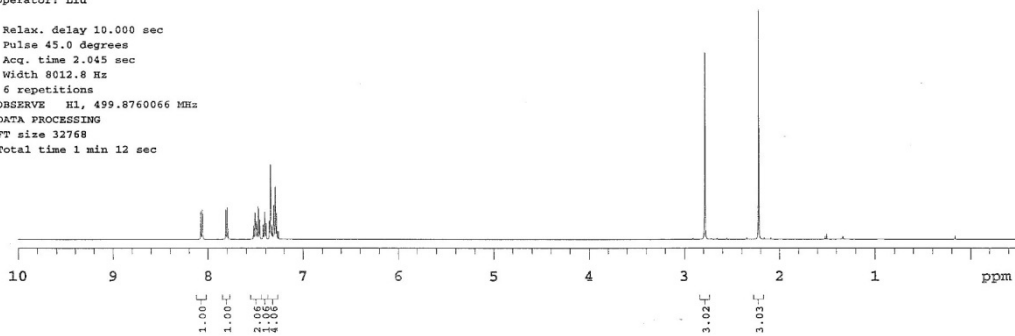

Sample Name:

Data Collected on:  
nmr18-vnmrs500  
Archive directory:

Sample directory:

FidFile: CARBON

Pulse Sequence: CARBON (s2pul)  
Solvent: cdcl3  
Data collected on: Dec 19 2019

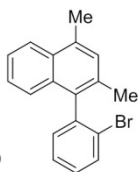

Temp. 25.0 C / 298.1 K  
Operator: Liu

Relax. delay 1.000 sec  
Pulse 45.0 degrees  
Acq. time 1.049 sec  
Width 31250.0 Hz  
100 repetitions  
OBSERVE C13, 125.6939123 MHz  
DECOUPLE H1, 499.8785010 MHz  
Power 44 dB  
continuously on  
WALTZ-16 modulated  
DATA PROCESSING  
Line broadening 0.5 Hz  
FT size 65536  
Total time 3 min 25 sec

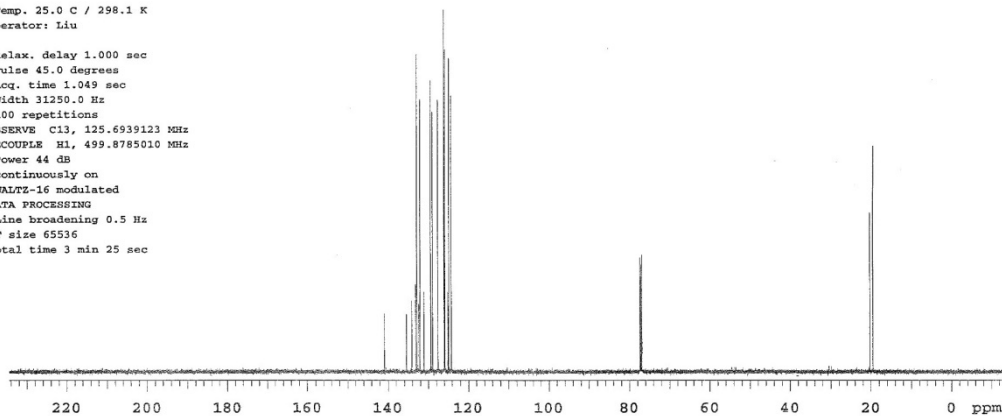

Sample Name:

Data Collected on:  
nmr18-vnmrs500  
Archive directory:

Sample directory:

FidFile: PROTON

Pulse Sequence: PROTON (s2pul)  
Solvent: cdcl3  
Data collected on: Jul 5 2019

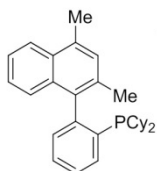

Temp. 25.0 C / 298.1 K  
Operator: Liu

Relax. delay 10.000 sec  
Pulse 45.0 degrees  
Acq. time 2.045 sec  
Width 8012.8 Hz  
4 repetitions  
OBSERVE H1, 499.8762752 MHz  
DATA PROCESSING  
FT size 32768  
Total time 16 min

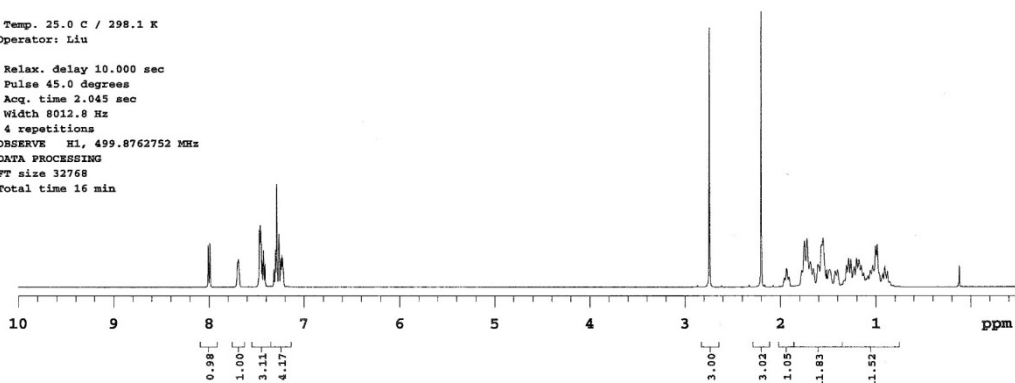

STANDARD FLUORINE PARAMETERS

Sample Name:  
Data Collected on:  
nmr18-vnmrs500  
Archive directory:  
Sample directory:  
Fidfile: CARBON  
Pulse Sequence: CARBON (s2pul)  
Solvent: cdcl3  
Data collected on: Jul 5 2019

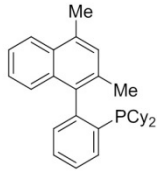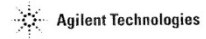

Temp. 25.0 C / 298.1 K  
Operator: Liu

Relax. delay 1.000 sec  
Pulse 45.0 degrees  
Acq. time 1.049 sec  
Width 31250.0 Hz  
204 repetitions  
OBSERVE C13, 125.6939763 MHz  
DECOUPLE H1, 499.8787746 MHz  
Power 43 dB  
continuously on  
WALTZ-16 modulated  
DATA PROCESSING  
Line broadening 0.5 Hz  
FT size 65536  
Total time 34 min

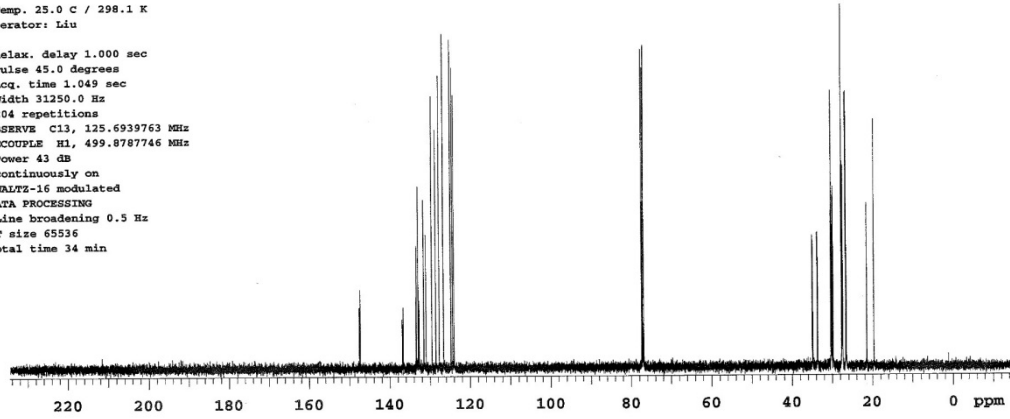

Sample Name:

Data Collected on:  
nmr18-vnmrs500  
Archive directory:  
Sample directory:  
Fidfile: PHOSPHORUS  
Pulse Sequence: PHOSPHORUS (s2pul)  
Solvent: cdcl3  
Data collected on: Jul 5 2019

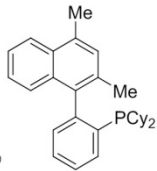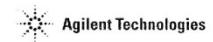

Temp. 25.0 C / 298.1 K  
Operator: Liu

Relax. delay 1.000 sec  
Pulse 45.0 degrees  
Acq. time 0.655 sec  
Width 50000.0 Hz  
7 repetitions  
OBSERVE P31, 202.3535033 MHz  
DECOUPLE H1, 499.8787746 MHz  
Power 43 dB  
on during acquisition  
off during delay  
WALTZ-16 modulated  
DATA PROCESSING  
Line broadening 0.5 Hz  
FT size 65536  
Total time 0 min 12 sec

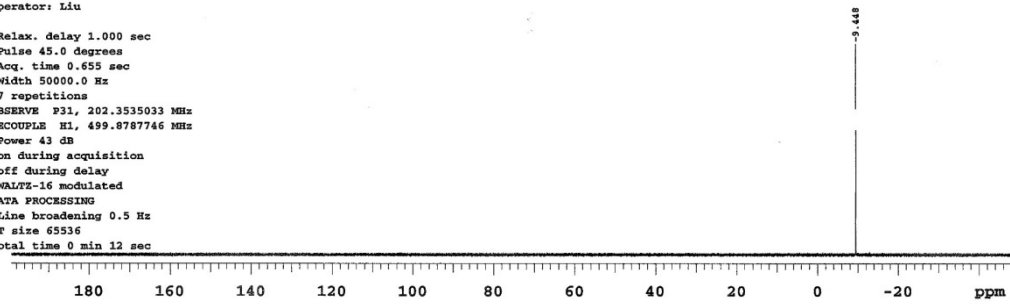

Sample Name:

Data Collected on:  
nmr19-vmrs600  
Archive directory:

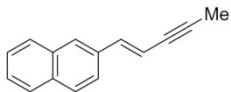

Sample directory:

FidFile: PROTON

Pulse Sequence: PROTON (s2pul)  
Solvent: cdcl3  
Data collected on: Oct 19 2019

Temp. 25.0 C / 298.1 K  
Operator: Liu

Relax. delay 10.000 sec  
Pulse 45.0 degrees  
Acq. time 1.704 sec  
Width 9615.4 Hz  
8 repetitions  
OBSERVE H1, 599.680632 MHz  
DATA PROCESSING  
FT size 32768  
Total time 1 min 34 sec

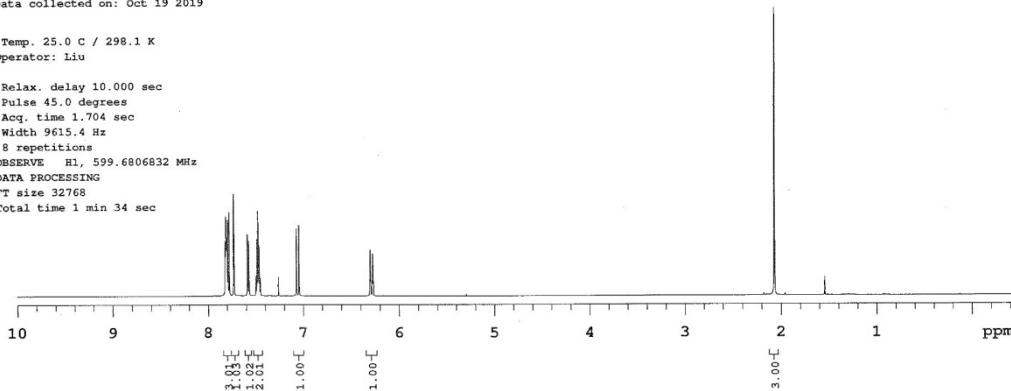

Sample Name:

Data Collected on:  
nmr19-vmrs600  
Archive directory:

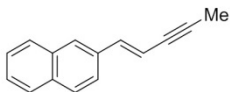

Sample directory:

FidFile: CARBON

Pulse Sequence: CARBON (s2pul)  
Solvent: cdcl3  
Data collected on: Oct 19 2019

Temp. 25.0 C / 298.1 K  
Operator: Liu

Relax. delay 1.000 sec  
Pulse 45.0 degrees  
Acq. time 0.865 sec  
Width 37878.8 Hz  
140 repetitions  
OBSERVE C13, 150.7898143 MHz  
DECOUPLE H1, 599.6836825 MHz  
Power 46 dB  
continuously on  
WALTZ-16 modulated  
DATA PROCESSING  
Line broadening 0.5 Hz  
FT size 65536  
Total time 31 min

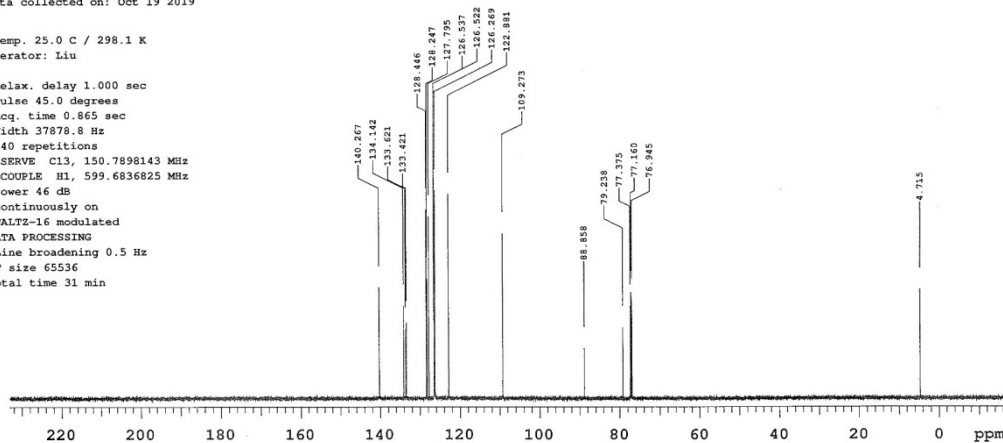

Sample Name:

Data Collected on:  
nmr18-vnmrs500

Archive directory:

Sample directory:

FidFile: PROTON

Pulse Sequence: PROTON (s2pul)  
Solvent: cdcl3  
Data collected on: Oct 21 2019

Temp. 25.0 C / 298.1 K  
Operator: Liu

Relax. delay 10.000 sec  
Pulse 45.0 degrees  
Acq. time 2.045 sec  
Width 8012.8 Hz  
6 repetitions  
OBSERVE H1, 499.8762807 MHz  
DATA PROCESSING  
FT size 32768  
Total time 1 min 36 sec

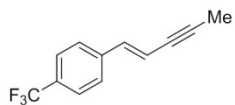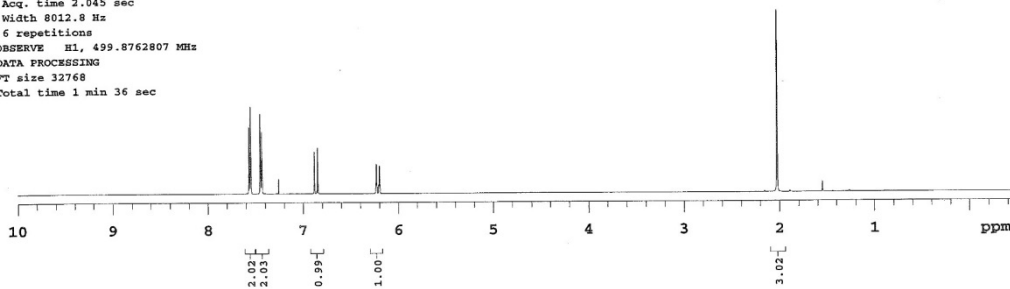

Sample Name:

Data Collected on:  
nmr18-vnmrs500

Archive directory:

Sample directory:

FidFile: CARBON

Pulse Sequence: CARBON (s2pul)  
Solvent: cdcl3  
Data collected on: Oct 21 2019

Temp. 25.0 C / 298.1 K  
Operator: Liu

Relax. delay 1.000 sec  
Pulse 45.0 degrees  
Acq. time 1.049 sec  
Width 31250.0 Hz  
300 repetitions  
OBSERVE C13, 125.6939696 MHz  
DECOUPLE H1, 499.8787746 MHz  
Power 45 dB  
continuously on  
WALTZ-16 modulated  
DATA PROCESSING  
Line broadening 0.5 Hz  
FT size 65536  
Total time 34 min

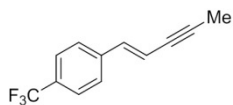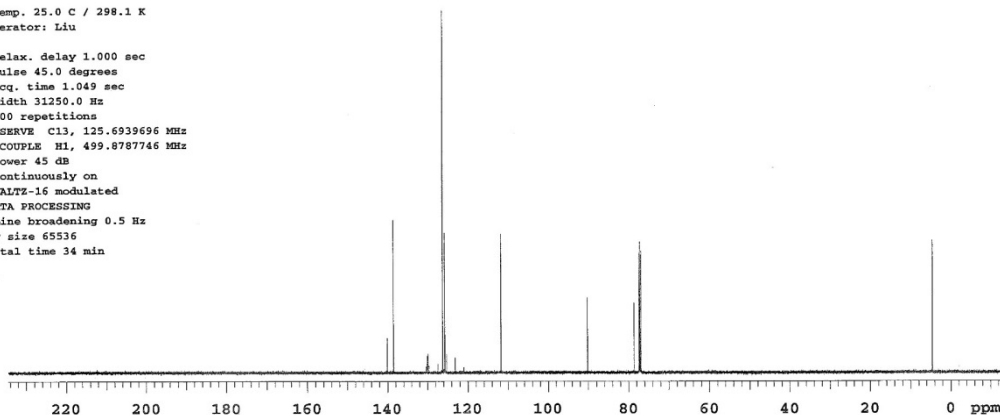

STANDARD FLUORINE PARAMETERS

Sample Name:

Data Collected on:  
nmr18-vnmrs500

Archive directory:

Sample directory:

Fidfile: FLUORINE

Pulse Sequence: FLUORINE (s2pul)  
Solvent: cdcl3  
Data collected on: Oct 21 2019

Temp. 25.0 C / 298.1 K  
Operator: Liu

Relax. delay 1.000 sec  
Pulse 30.0 degrees  
Acq. time 0.603 sec  
Width 108.7 kHz  
10 repetitions  
OBSERVE F19, 470.3536374 MHz  
DATA PROCESSING  
FT size 131072  
Total time 0 min 16 sec

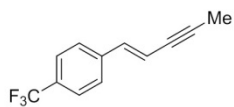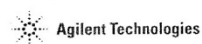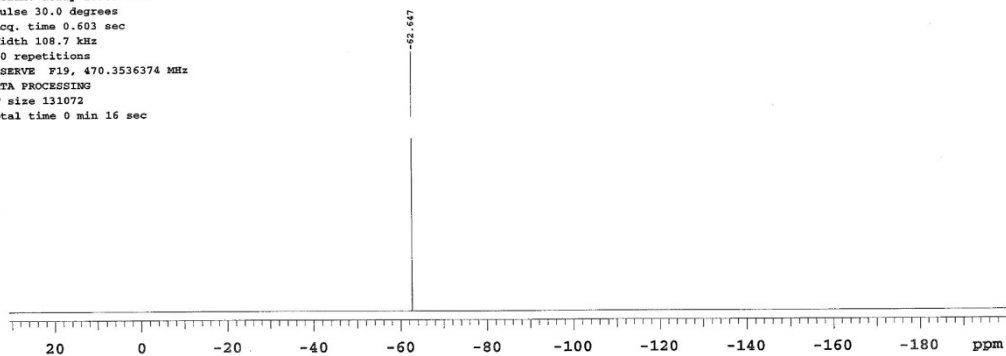

Sample Name:

Data Collected on:  
nmr19-vnmrs600

Archive directory:

Sample directory:

Fidfile: PROTON

Pulse Sequence: PROTON (s2pul)  
Solvent: cdcl3  
Data collected on: Jan 2 2020

Temp. 25.0 C / 298.1 K  
Operator: Liu

Relax. delay 10.000 sec  
Pulse 45.0 degrees  
Acq. time 1.704 sec  
Width 9615.4 Hz  
4 repetitions  
OBSERVE H1, 599.6806832 MHz  
DATA PROCESSING  
FT size 32768  
Total time 0 min 47 sec

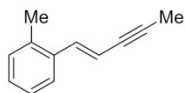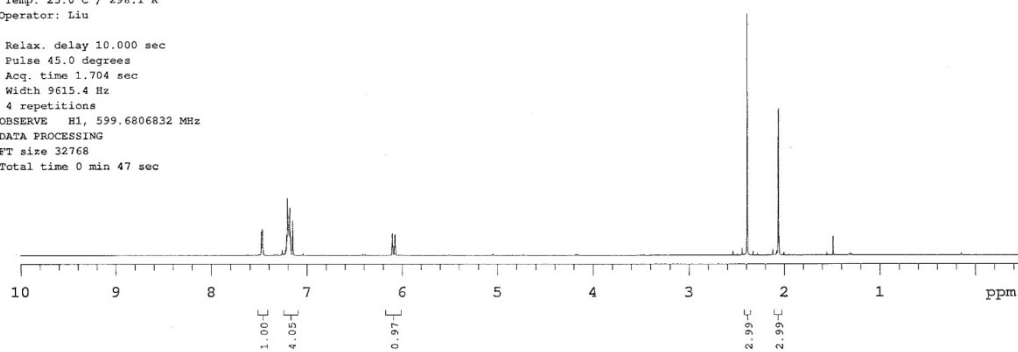

Sample Name:

Data Collected on:  
nmr19-vnmrs600  
Archive directory:

Sample directory:

FidFile: CARBON

Pulse Sequence: CARBON (s2pul)  
Solvent: cdcl3  
Data collected on: Jan 2 2020

Temp. 25.0 C / 298.1 K  
Operator: Liu

Relax. delay 1.000 sec  
Pulse 45.0 degrees  
Acq. time 0.855 sec  
Width 37979.8 Hz  
16 repetitions  
OBSERVE C13, 150.7898189 MHz  
DECOUPLE H1, 59.6836825 MHz  
Power 45 dB  
continuously on  
WALTZ-16 modulated  
DATA PROCESSING  
Line broadening 0.5 Hz  
FT size 65536  
Total time 3 min 7 sec

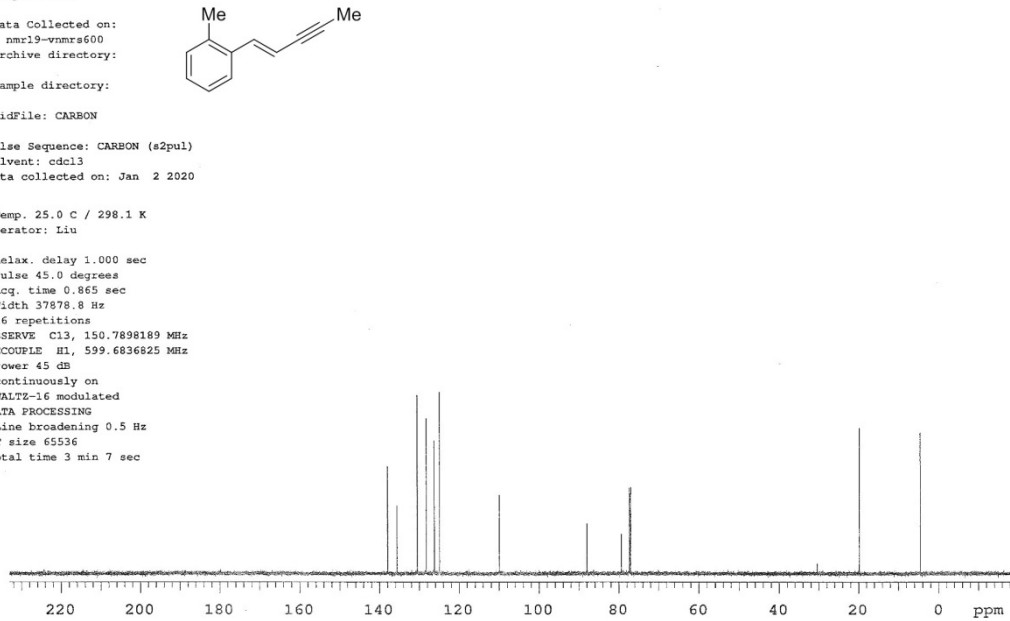

Sample Name:

Data Collected on:  
nmr18-vnmrs500  
Archive directory:

Sample directory:

FidFile: PROTON

Pulse Sequence: PROTON (s2pul)  
Solvent: cdcl3  
Data collected on: Oct 23 2019

Temp. 25.0 C / 298.1 K  
Operator: Liu

Relax. delay 10.000 sec  
Pulse 45.0 degrees  
Acq. time 2.045 sec  
Width 8012.8 Hz  
4 repetitions  
OBSERVE H1, 499.8762802 MHz  
DATA PROCESSING  
FT size 32768  
Total time 0 min 48 sec

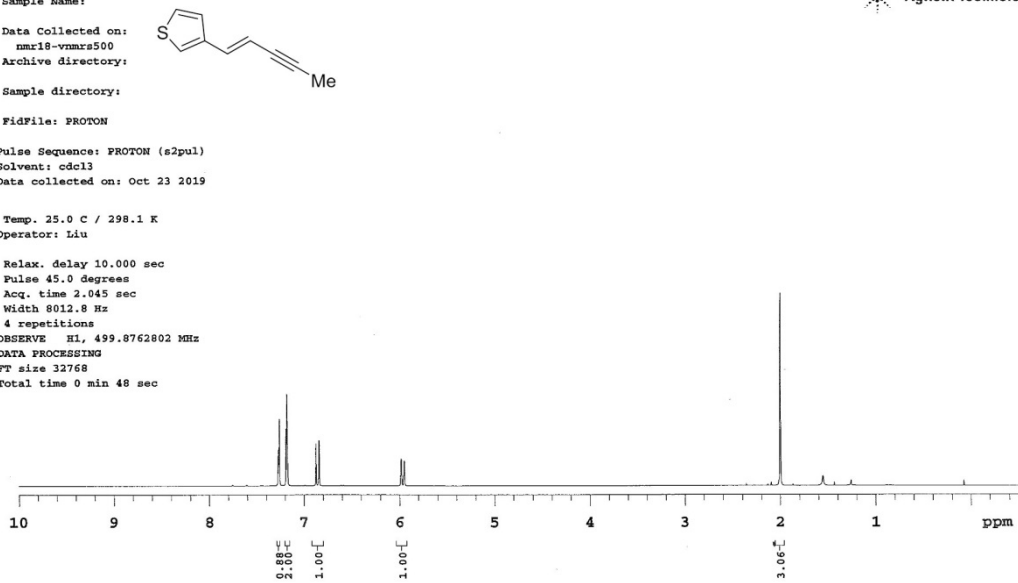

 Agilent Technologies



Sample Name:

Data Collected on:  
nmr18-vnmrs500  
Archive directory:

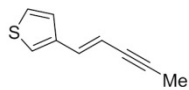

Sample directory:

FidFile: CARBON

Pulse Sequence: CARBON (s2pul)  
Solvent: cdcl3  
Data collected on: Oct 23 2019

Temp. 25.0 C / 298.1 K  
Operator: Liu

Relax. delay 1.000 sec  
Pulse 45.0 degrees  
Acq. time 1.049 sec  
Width 31250.0 Hz  
202 repetitions  
OBSERVE C13, 125.6939715 MHz  
DECOUPLE H1, 499.8787746 MHz  
Power 45 dB  
continuously on  
WALTZ-16 modulated  
DATA PROCESSING  
Line broadening 0.5 Hz  
FT size 65536  
Total time 34 min

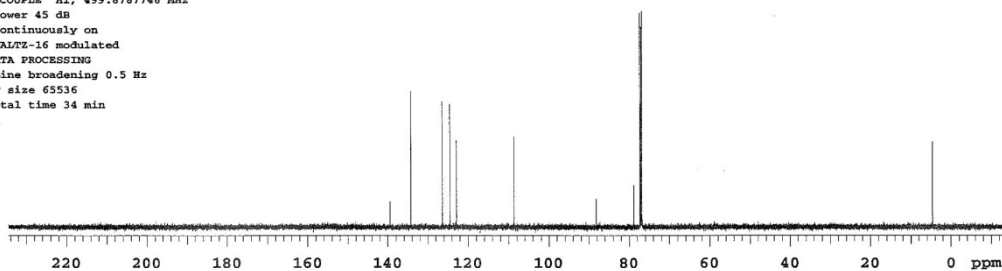

Sample Name:

Data Collected on:  
nmr18-vnmrs500  
Archive directory:

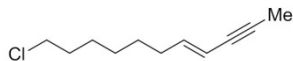

Sample directory:

FidFile: PROTON

Pulse Sequence: PROTON (s2pul)  
Solvent: cdcl3  
Data collected on: Oct 20 2019

Temp. 25.0 C / 298.1 K  
Operator: Liu

Relax. delay 10.000 sec  
Pulse 45.0 degrees  
Acq. time 2.045 sec  
Width 8012.8 Hz  
6 repetitions  
OBSERVE H1, 499.8762752 MHz  
DATA PROCESSING  
FT size 32768  
Total time 1 min 12 sec

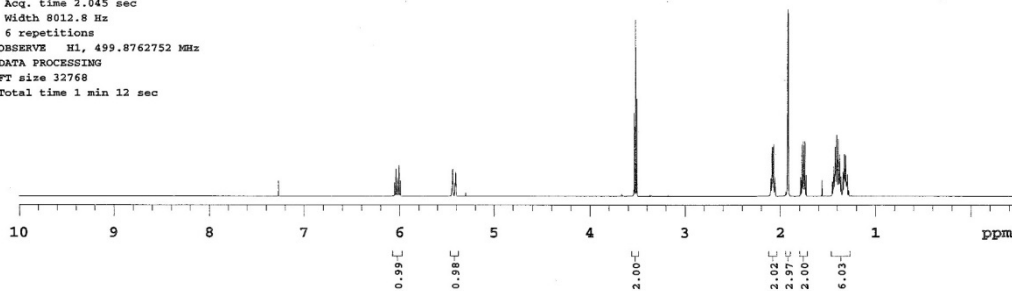

Sample Name:

Data Collected on:  
nmr18-vnmrs500  
Archive directory:

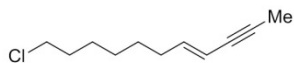

Sample directory:

FidFile: CARBON

Pulse Sequence: CARBON (s2pul)  
Solvent: cdcl3  
Data collected on: Oct 20 2019

Temp. 25.0 C / 298.1 K  
Operator: Liu

Relax. delay 1.000 sec  
Pulse 45.0 degrees  
Acq. time 1.049 sec  
Width 31250.0 Hz  
120 repetitions  
OBSERVE C13, 125.6939734 MHz  
DECOUPLE H1, 499.8787746 MHz  
Power 45 dB  
continuously on  
WALTZ-16 modulated  
DATA PROCESSING  
Line broadening 0.5 Hz  
FT size 65536  
Total time 34 min

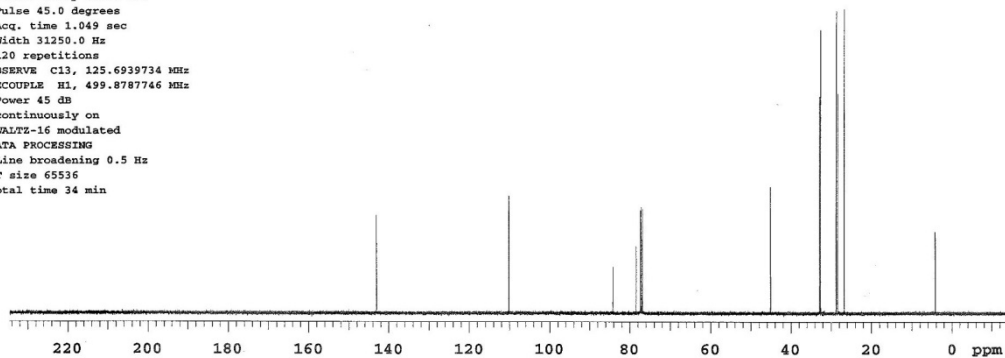

Sample Name:

Data Collected on:  
nmr18-vnmrs500  
Archive directory:

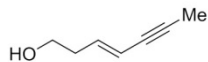

Sample directory:

FidFile: PROTON

Pulse Sequence: PROTON (s2pul)  
Solvent: cdcl3  
Data collected on: Oct 24 2019

Temp. 25.0 C / 298.1 K  
Operator: Liu

Relax. delay 10.000 sec  
Pulse 45.0 degrees  
Acq. time 2.045 sec  
Width 8012.8 Hz  
8 repetitions  
OBSERVE H1, 499.8762802 MHz  
DATA PROCESSING  
FT size 32768  
Total time 1 min 36 sec

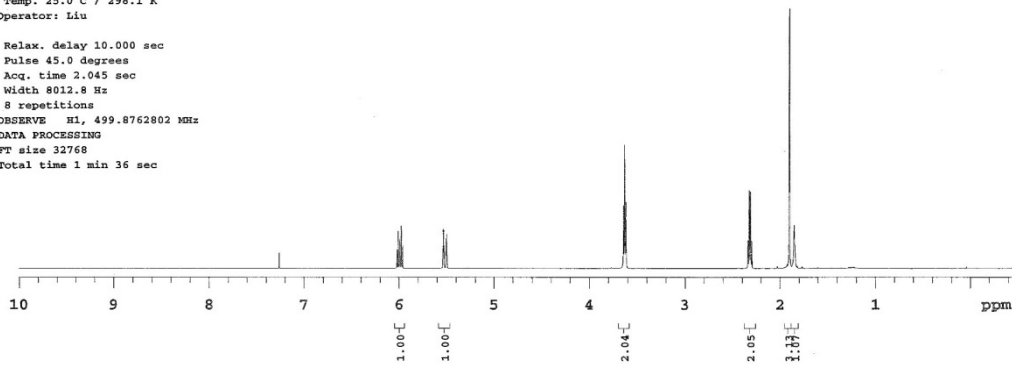

Sample Name:

Data Collected on:  
nmr18-vnmrs500  
Archive directory:

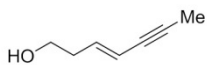

Sample directory:

FidFile: CARBON

Pulse Sequence: CARBON (s2pul)  
Solvent: cdcl3  
Data collected on: Oct 24 2019

Temp. 25.0 C / 298.1 K  
Operator: Liu

Relax. delay 1.000 sec  
Pulse 45.0 degrees  
Acq. time 1.049 sec  
Width 31250.0 Hz  
124 repetitions  
OBSERVE C13, 125.6939753 MHz  
DECOUPLE H1, 499.8787746 MHz  
Power 45 dB  
continuously on  
WALTZ-16 modulated  
DATA PROCESSING  
Line broadening 0.5 Hz  
FT size 65536  
Total time 34 min

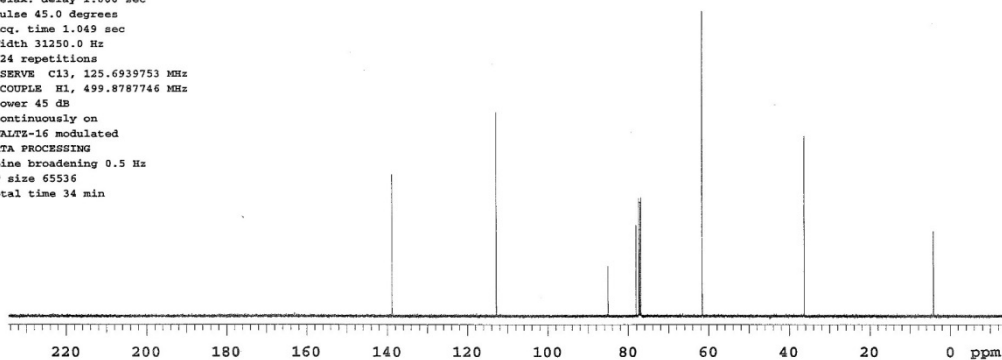

Sample Name:

Data Collected on:  
nmr19-vnmrs600  
Archive directory:

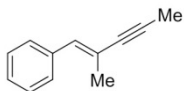

Sample directory:

FidFile: PROTON

Pulse Sequence: PROTON (s2pul)  
Solvent: cdcl3  
Data collected on: Nov 7 2019

Temp. 25.0 C / 298.1 K  
Operator: Liu

Relax. delay 10.000 sec  
Pulse 45.0 degrees  
Acq. time 1.704 sec  
Width 9615.4 Hz  
4 repetitions  
OBSERVE H1, 599.6806910 MHz  
DATA PROCESSING  
FT size 32768  
Total time 0 min 47 sec

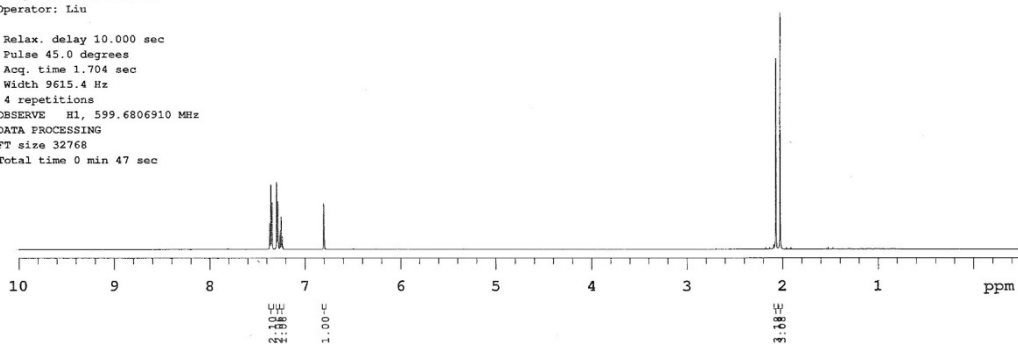

Sample Name:

Data Collected on:  
nmr19-vnmrs600  
Archive directory:

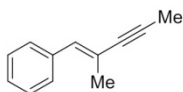

Sample directory:

FidFile: CARBON

Pulse Sequence: CARBON (s2pul)  
Solvent: d2o  
Data collected on: Nov 7 2019

Temp. 25.0 C / 298.1 K  
Operator: Liu

Relax. delay 1.000 sec  
Pulse 45.0 degrees  
Acq. time 0.865 sec  
Width 37878.8 Hz  
26 repetitions  
OBSERVE C13, 150.7898204 MHz  
DECOUPLE H1, 599.6852237 MHz  
Power 46 dB  
continuously on  
WALTZ-16 modulated  
DATA PROCESSING  
Line broadening 0.5 Hz  
FT size 65536  
Total time 0 min 56 sec

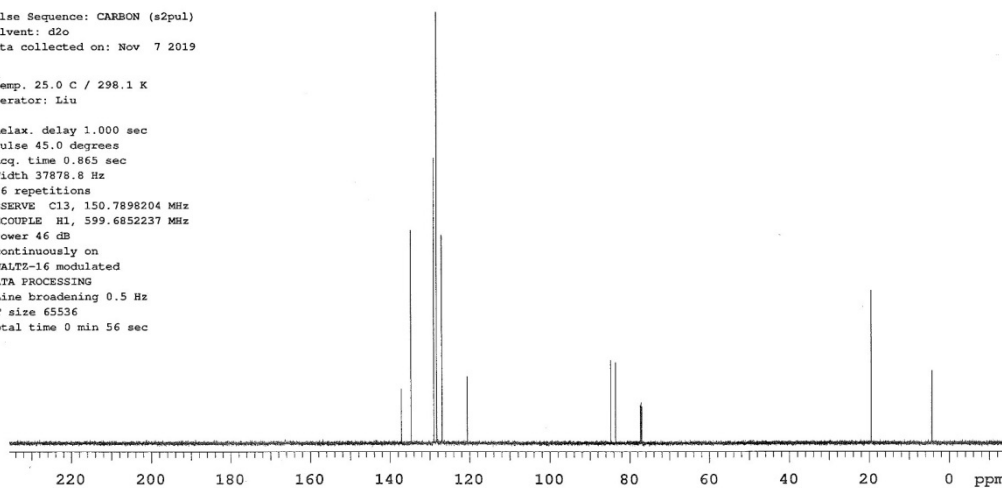

Sample Name:

Data Collected on:  
nmr18-vnmrs500  
Archive directory:

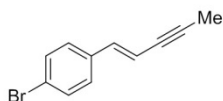

Sample directory:

FidFile: PROTON

Pulse Sequence: PROTON (s2pul)  
Solvent: cdcl3  
Data collected on: Oct 23 2019

Temp. 25.0 C / 298.1 K  
Operator: Liu

Relax. delay 10.000 sec  
Pulse 45.0 degrees  
Acq. time 2.045 sec  
Width 8012.8 Hz  
5 repetitions  
OBSERVE H1, 499.8762807 MHz  
DATA PROCESSING  
FT size 32768  
Total time 1 min 36 sec

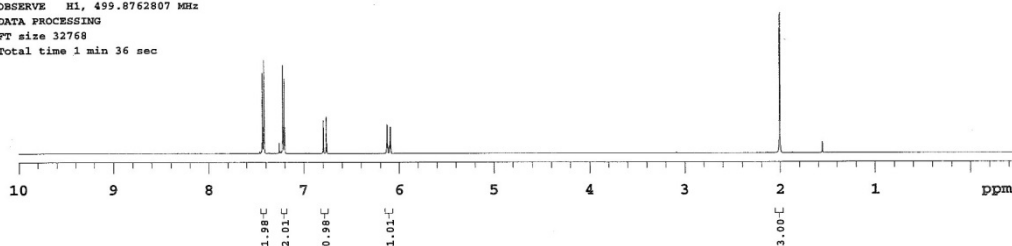

 Agilent Technologies

Sample Name:  
Data Collected on:  
nmr18-vnmrs500  
Archive directory:  
Sample directory:

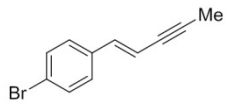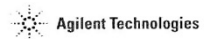

FidFile: CARBON  
Pulse Sequence: CARBON (s2pul)  
Solvent: cdcl3  
Data collected on: Oct 23 2019

Temp. 25.0 C / 298.1 K  
Operator: Liu

Relax. delay 1.000 sec  
Pulse 45.0 degrees  
Acq. time 1.049 sec  
Width 31250.0 Hz  
120 repetitions  
OBSERVE C13, 125.6939753 MHz  
DECOUPLE H1, 499.8787746 MHz  
Power 45 dB  
continuously on  
WALTZ-16 modulated  
DATA PROCESSING  
Line broadening 0.5 Hz  
FT size 65536  
Total time 34 min

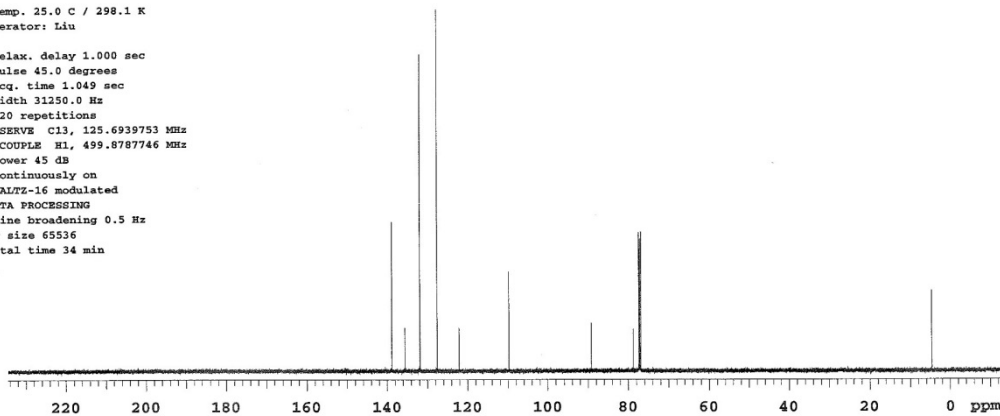

2-furan

Sample Name:  
Data Collected on:  
nmr18-vnmrs500  
Archive directory:  
Sample directory:  
FidFile: PROTON

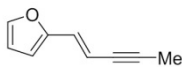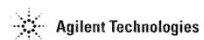

Pulse Sequence: PROTON (s2pul)  
Solvent: cdcl3  
Data collected on: Jun 26 2019

Temp. 25.0 C / 298.1 K  
Operator: Liu

Relax. delay 10.000 sec  
Pulse 45.0 degrees  
Acq. time 2.045 sec  
Width 8012.8 Hz  
6 repetitions  
OBSERVE H1, 499.8762752 MHz  
DATA PROCESSING  
FF size 32768  
Total time 8 min 2 sec

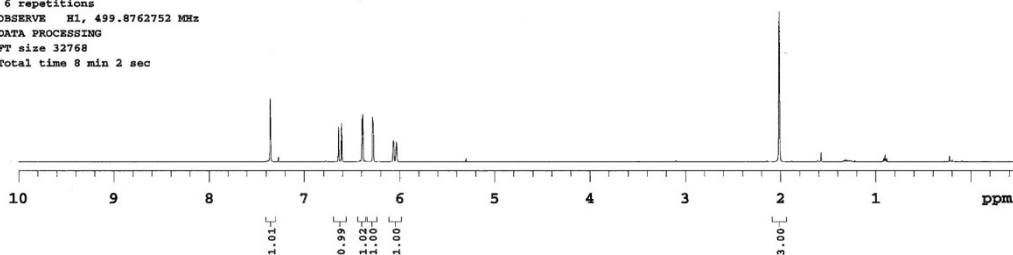

2-furan

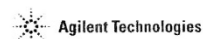

Sample Name:  
Data Collected on:  
nmr18-vnmrs500  
Archive directory:

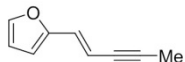

Sample directory:  
Fidfile: CARBON  
Pulse Sequence: CARBON (s2pul)  
Solvent: cdcl3  
Data collected on: Jun 26 2019

Temp. 25.0 C / 298.1 K  
Operator: Liu

Relax. delay 1.000 sec  
Pulse 45.0 degrees  
Acq. time 1.049 sec  
Width 31250.0 Hz  
40 repetitions  
OBSERVE C13, 125.6939753 MHz  
DECOUPLE H1, 499.8787746 MHz  
Power 43 dB  
continuously on  
WALTZ-16 modulated  
DATA PROCESSING  
Line broadening 0.5 Hz  
FT size 65536  
Total time 5 hr, 41 min

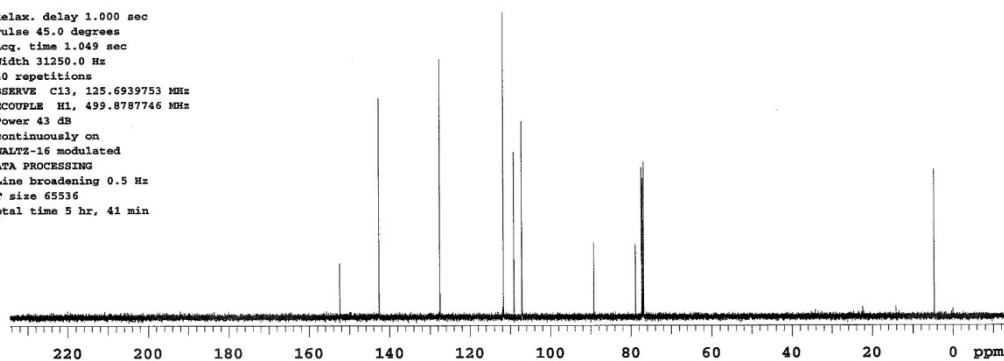

Sample Name:  
Data Collected on:  
nmr19-vnmrs600  
Archive directory:

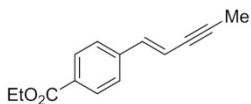

Sample directory:  
Fidfile: PROTON  
Pulse Sequence: PROTON (s2pul)  
Solvent: cdcl3  
Data collected on: Oct 22 2019

Temp. 25.0 C / 298.1 K  
Operator: Liu

Relax. delay 10.000 sec  
Pulse 45.0 degrees  
Acq. time 1.704 sec  
Width 9615.4 Hz  
2 repetitions  
OBSERVE H1, 599.6806841 MHz  
DATA PROCESSING  
FT size 32768  
Total time 0 min 59 sec

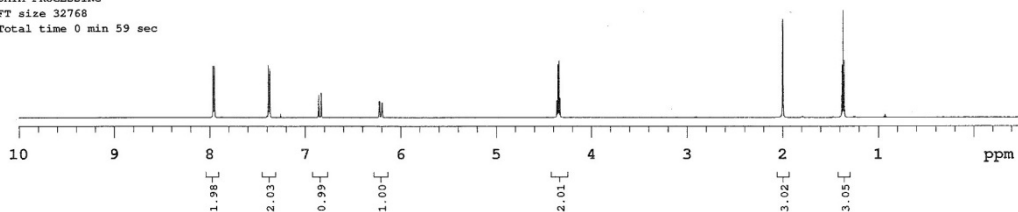

Sample Name:

Data Collected on:  
nmr19-vmrns600  
Archive directory:

Sample directory:

FidFile: CARBON

Pulse Sequence: CARBON (s2pul)  
Solvent: cdcl3  
Data collected on: Oct 22 2019

Temp. 25.0 C / 298.1 K  
Operator: Liu

Relax. delay 1.000 sec  
Pulse 45.0 degrees  
Acq. time 0.865 sec  
Width 37878.8 Hz  
40 repetitions  
OBSERVE C13, 150.7898154 MHz  
DECOUPLE H1, 599.6836825 MHz  
Power 46 dB  
continuously on  
WALTZ-16 modulated  
DATA PROCESSING  
Line broadening 0.5 Hz  
FT size 65536  
Total time 31 min

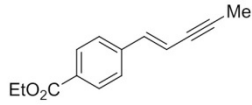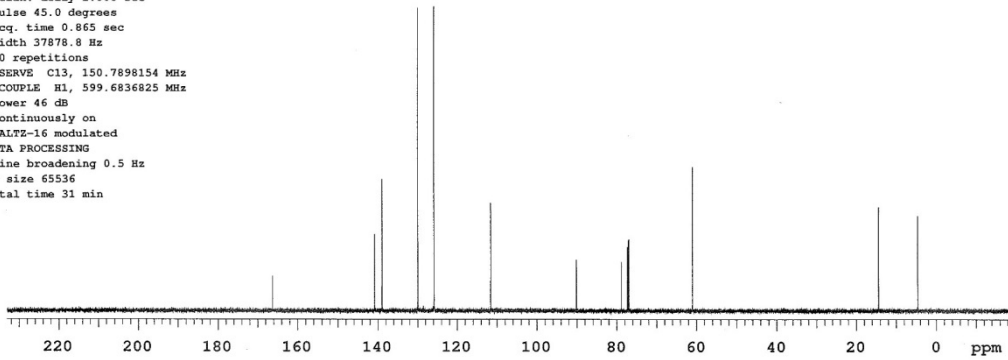

Sample Name:

Data Collected on:  
nmr18-vmrns500  
Archive directory:

Sample directory:

FidFile: PROTON

Pulse Sequence: PROTON (s2pul)  
Solvent: cdcl3  
Data collected on: Oct 29 2019

Temp. 25.0 C / 298.1 K  
Operator: Liu

Relax. delay 10.000 sec  
Pulse 45.0 degrees  
Acq. time 2.045 sec  
Width 8012.8 Hz  
10 repetitions  
OBSERVE H1, 499.8762807 MHz  
DATA PROCESSING  
FT size 32768  
Total time 2 min 0 sec

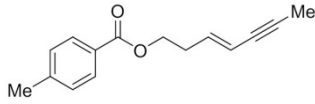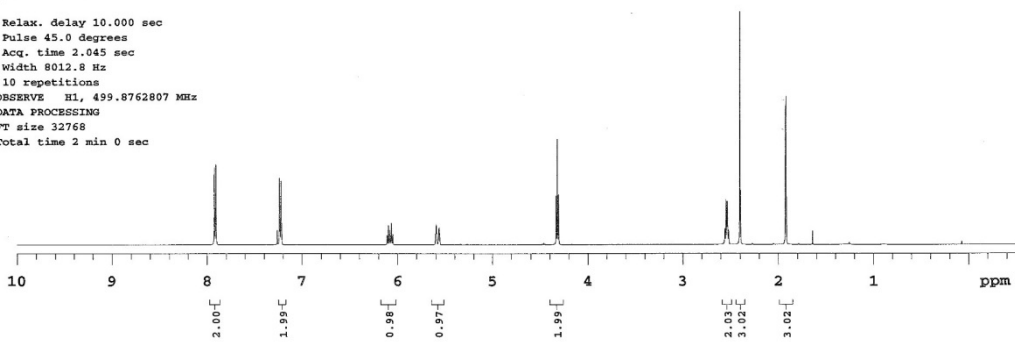

Agilent Technologies

Sample Name:

Data Collected on:  
nmr18-vnmrs500  
Archive directory:

Sample directory:

FidFile: CARBON

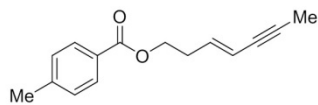

Pulse Sequence: CARBON (s2pul)  
Solvent: cdcl3  
Data collected on: Oct 25 2019

Temp. 25.0 C / 298.1 K  
Operator: Liu

Relax. delay 1.000 sec  
Pulse 45.0 degrees  
Acq. time 1.049 sec  
Width 31250.0 Hz  
168 repetitions  
OBSERVE C13, 125.6939773 MHz  
DECOUPLE H1, 499.8787746 MHz  
Power 45 dB  
continuously on  
WALTZ-16 modulated  
DATA PROCESSING  
Line broadening 0.5 Hz  
FT size 65536  
Total time 34 min

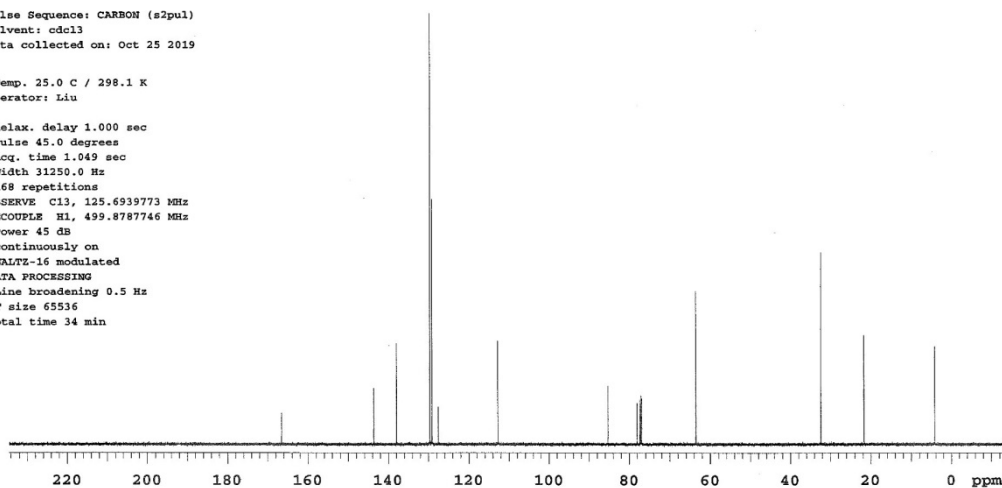

Sample Name:

Data Collected on:  
nmr19-vnmrs600  
Archive directory:

Sample directory:

FidFile: PROTON

Pulse Sequence: PROTON (s2pul)  
Solvent: cdcl3  
Data collected on: Oct 26 2019

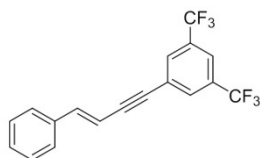

Temp. 25.0 C / 298.1 K  
Operator: Liu

Relax. delay 10.000 sec  
Pulse 45.0 degrees  
Acq. time 1.704 sec  
Width 9615.4 Hz  
5 repetitions  
OBSERVE H1, 599.6806772 MHz  
DATA PROCESSING  
FT size 32768  
Total time 0 min 59 sec

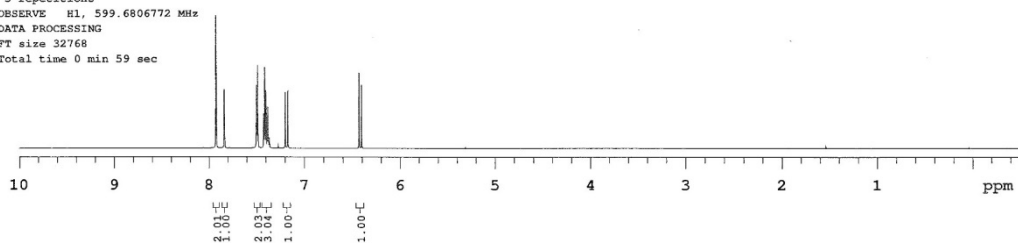



Sample Name:  
Data Collected on:  
nmr19-vnmrs600  
Archive directory:  
Sample directory:  
FidFile: yz-3-191026-ph-ph-cf32-C

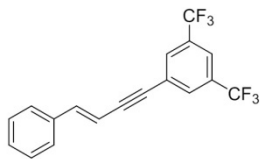

Pulse Sequence: CARBON (s2pul)  
Solvent: cdcl3  
Data collected on: Oct 26 2019

Temp. 25.0 C / 298.1 K  
Operator: Liu

Relax. delay 1.000 sec  
Pulse 45.0 degrees  
Acq. time 0.865 sec  
Width 37878.8 Hz  
280 repetitions  
OBSERVE C13, 150.7898054 MHz  
DECOUPLE H1, 599.6852237 MHz  
Power 46 dB  
continuously on  
WALTZ-16 modulated  
DATA PROCESSING  
Line broadening 0.5 Hz  
FT size 65536  
Total time 31 min

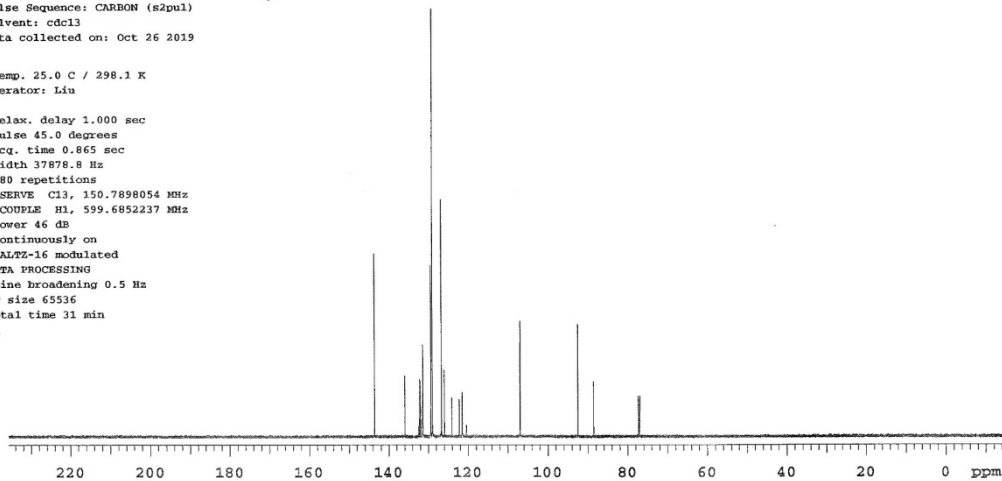

STANDARD FLUORINE PARAMETERS

Sample Name:  
Data Collected on:  
nmr19-vnmrs600  
Archive directory:  
Sample directory:  
FidFile: yz-3-191026-ph-ph-cf32-F

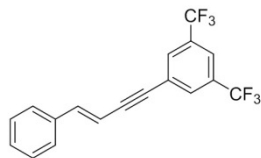

Pulse Sequence: FLUORINE (s2pul)  
Solvent: cdcl3  
Data collected on: Oct 26 2019

Temp. 25.0 C / 298.1 K  
Operator: Liu

Relax. delay 1.000 sec  
Pulse 30.0 degrees  
Acq. time 0.996 sec  
Width 131.6 kHz  
10 repetitions  
OBSERVE F19, 564.2650590 MHz  
DATA PROCESSING  
FT size 262144  
Total time 0 min 20 sec

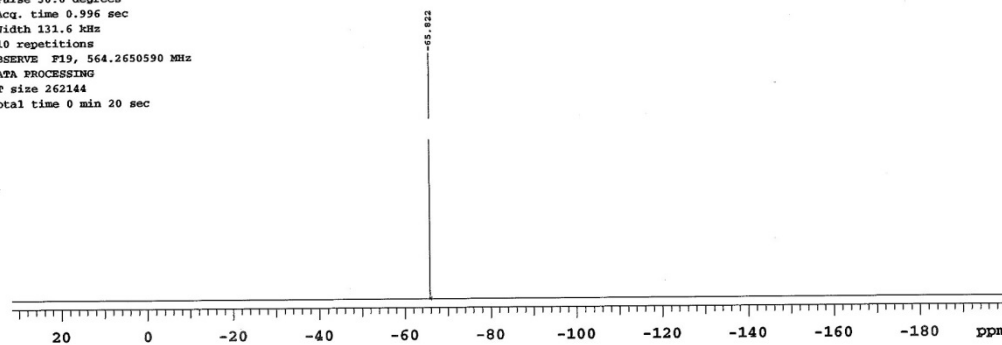

Sample Name:

Data Collected on:  
nmr18-vnmrs500  
Archive directory:

Sample directory:

FidFile: PROTON

Pulse Sequence: PROTON (s2pul)  
Solvent: cdcl3  
Data collected on: Sep 28 2019

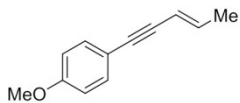

Temp. 25.0 C / 298.1 K  
Operator: Liu

Relax. delay 10.000 sec  
Pulse 45.0 degrees  
Acq. time 2.045 sec  
Width 8012.8 Hz  
6 repetitions  
OBSERVE H1, 499.8762807 MHz  
DATA PROCESSING  
FT size 32768  
Total time 1 min 12 sec

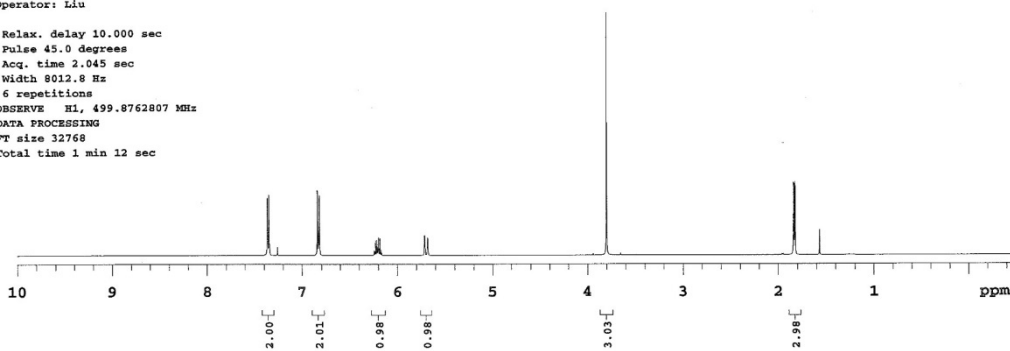

Sample Name:

Data Collected on:  
nmr14-vnmrs400  
Archive directory:

Sample directory:

FidFile: CARBON

Pulse Sequence: CARBON (s2pul)  
Solvent: cdcl3  
Data collected on: Sep 13 2019

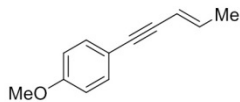

Temp. 25.0 C / 298.1 K  
Operator: Liu

Relax. delay 1.000 sec  
Pulse 45.0 degrees  
Acq. time 1.311 sec  
Width 25000.0 Hz  
104 repetitions  
OBSERVE C13, 100.5208778 MHz  
DECOUPLE H1, 399.7666112 MHz  
Power 40 dB  
continuously on  
WALTZ-16 modulated  
DATA PROCESSING  
Line broadening 0.5 Hz  
FT size 65536  
Total time 38 min

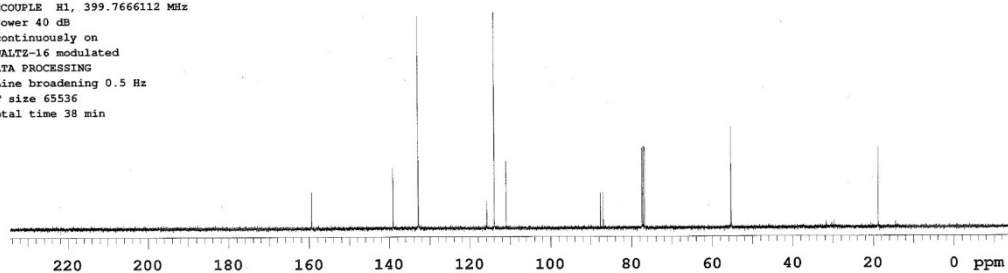

Sample Name:

Data Collected on:  
nmr18-vnmrs500  
Archive directory:

Sample directory:

FidFile: PROTON

Pulse Sequence: PROTON (s2pul)  
Solvent: cdcl3  
Data collected on: Jul 5 2019

Temp. 25.0 C / 298.1 K  
Operator: Liu

Relax. delay 10.000 sec  
Pulse 45.0 degrees  
Acq. time 2.045 sec  
Width 8012.8 Hz  
4 repetitions  
OBSERVE H1, 499.8762797 MHz  
DATA PROCESSING  
FT size 32768  
Total time 20 min

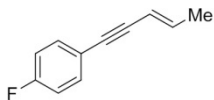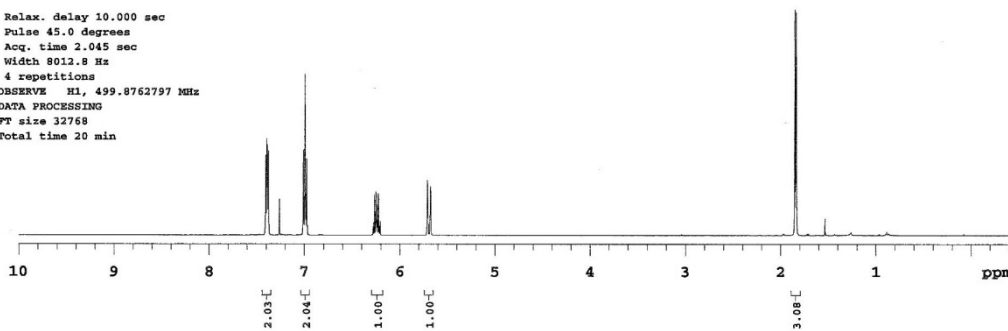

Sample Name:

Data Collected on:  
nmr18-vnmrs500  
Archive directory:

Sample directory:

FidFile: CARBON

Pulse Sequence: CARBON (s2pul)  
Solvent: cdcl3  
Data collected on: Jul 5 2019

Temp. 25.0 C / 298.1 K  
Operator: Liu

Relax. delay 1.000 sec  
Pulse 45.0 degrees  
Acq. time 1.049 sec  
Width 31250.0 Hz  
300 repetitions  
OBSERVE C13, 125.6939696 MHz  
DECOUPLE H1, 499.8787746 MHz  
Power 43 dB  
continuously on  
WALTZ-16 modulated  
DATA PROCESSING  
Line broadening 0.5 Hz  
FT size 65536  
Total time 34 min

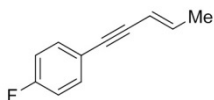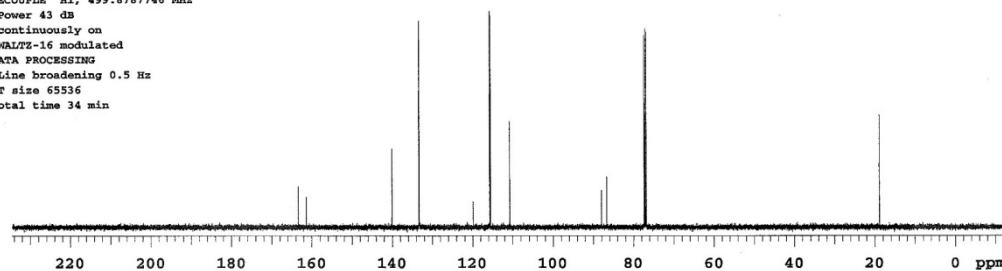

STANDARD FLUORINE PARAMETERS

Sample Name:

Data Collected on:  
nmr18-vnmrs500  
Archive directory:

Sample directory:

FidFile: FLUORINE

Pulse Sequence: FLUORINE (s2pul)  
Solvent: cdcl3  
Data collected on: Jul 5 2019

Temp. 25.0 C / 298.1 K  
Operator: Liu

Relax. delay 1.000 sec  
Pulse 30.0 degrees  
Acq. time 0.603 sec  
Width 108.7 kHz  
24 repetitions  
OBSERVE F19, 470.3536374 MHz  
DATA PROCESSING  
FT size 131072  
Total time 2 min 40 sec

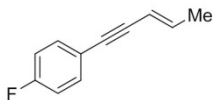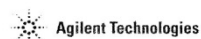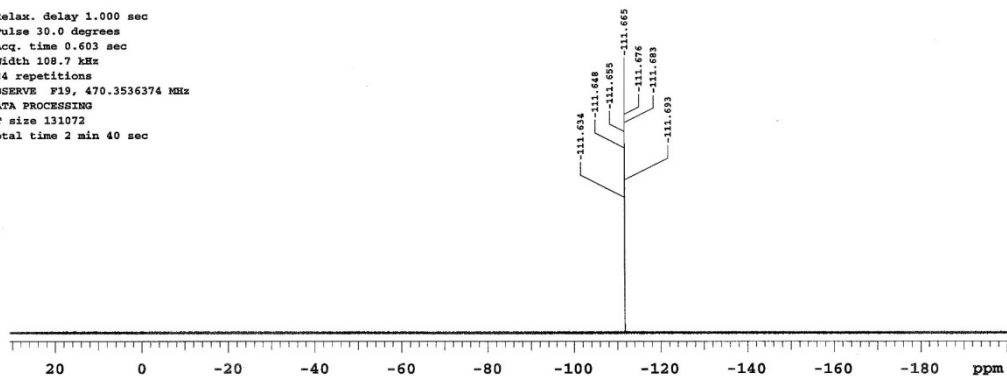

Sample Name:

Data Collected on:  
nmr18-vnmrs500  
Archive directory:

Sample directory:

FidFile: PROTON

Pulse Sequence: PROTON (s2pul)  
Solvent: cdcl3  
Data collected on: Oct 21 2019

Temp. 25.0 C / 298.1 K  
Operator: Liu

Relax. delay 10.000 sec  
Pulse 45.0 degrees  
Acq. time 2.045 sec  
Width 8012.8 Hz  
3 repetitions  
OBSERVE H1, 499.8762782 MHz  
DATA PROCESSING  
FT size 32768  
Total time 2 min 0 sec

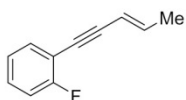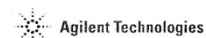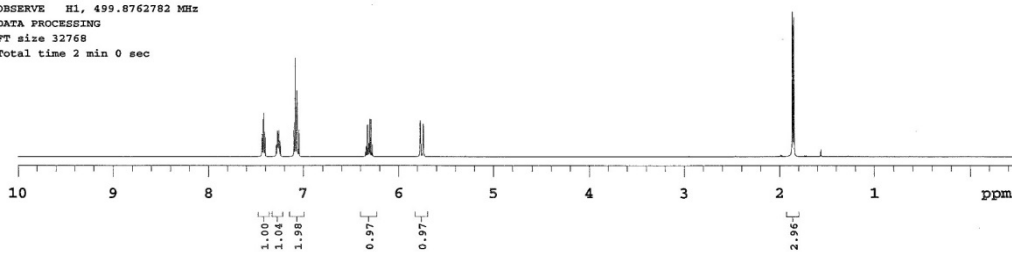

Sample Name:

Data Collected on:  
nmr18-vnmrs500  
Archive directory:

Sample directory:

FidFile: CARBON

Pulse Sequence: CARBON (s2pul)  
Solvent: cdcl3  
Data collected on: Oct 21 2019

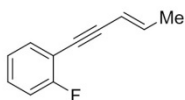

Temp. 25.0 C / 298.1 K  
Operator: Liu

Relax. delay 1.000 sec  
Pulse 45.0 degrees  
Acq. time 1.049 sec  
Width 31250.0 Hz  
162 repetitions  
OBSERVE C13, 125.6939753 MHz  
DECOUPLE H1, 499.8787746 MHz  
Power 45 dB  
continuously on  
WALTZ-16 modulated  
DATA PROCESSING  
Line broadening 0.5 Hz  
FT size 65536  
Total time 34 min

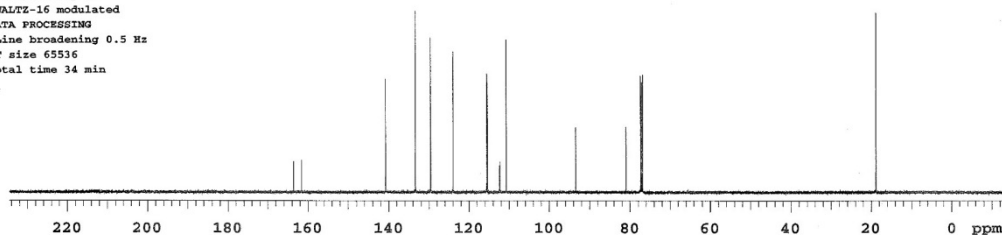

STANDARD FLUORINE PARAMETERS

Sample Name:

Data Collected on:  
nmr18-vnmrs500  
Archive directory:

Sample directory:

FidFile: yz-3-191021-orthoF-enyne-F

Pulse Sequence: FLUORINE (s2pul)  
Solvent: cdcl3  
Data collected on: Oct 21 2019

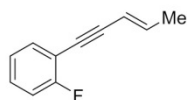

Temp. 25.0 C / 298.1 K  
Operator: Liu

Relax. delay 1.000 sec  
Pulse 30.0 degrees  
Acq. time 0.603 sec  
Width 108.7 kHz  
10 repetitions  
OBSERVE F19, 470.3536374 MHz  
DATA PROCESSING  
FT size 131072  
Total time 0 min 16 sec

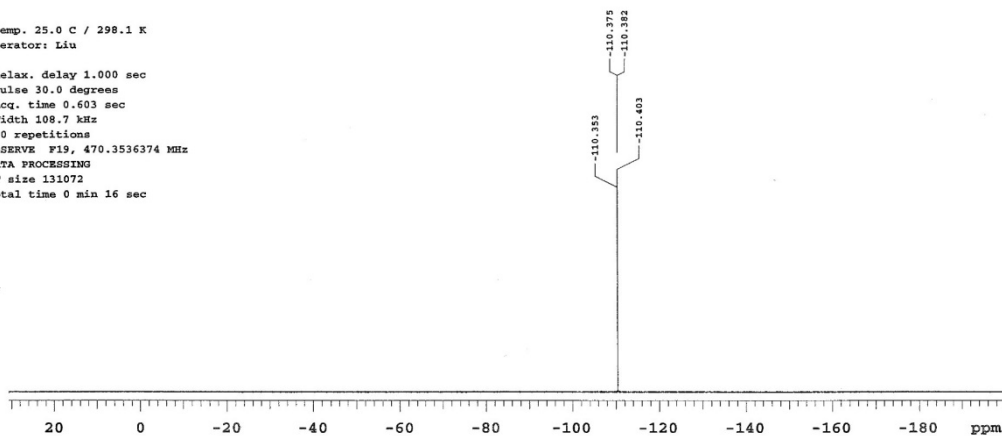

Sample Name:  
 Data Collected on:  
 nmr18-vnmrs500  
 Archive directory:  
 Sample directory:  
 FidFile: PROTON

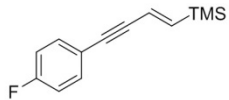

Pulse Sequence: PROTON (s2pul)  
 Solvent: cdcl3  
 Data collected on: Nov 1 2019

Temp. 25.0 C / 298.1 K  
 Operator: Liu

Relax. delay 10.000 sec  
 Pulse 45.0 degrees  
 Acq. time 2.045 sec  
 Width 8012.8 Hz  
 5 repetitions  
 OBSERVE H1, 499.8762807 MHz  
 DATA PROCESSING  
 FT size 32768  
 Total time 1 min 0 sec

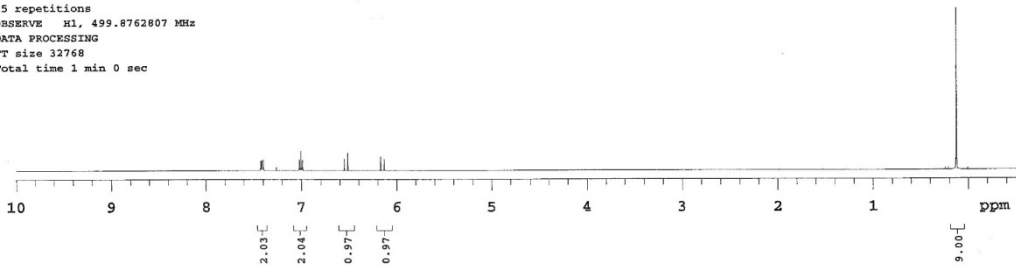

Sample Name:  
 Data Collected on:  
 nmr18-vnmrs500  
 Archive directory:  
 Sample directory:  
 FidFile: CARBON

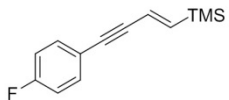

Pulse Sequence: CARBON (s2pul)  
 Solvent: cdcl3  
 Data collected on: Nov 1 2019

Temp. 25.0 C / 298.1 K  
 Operator: Liu

Relax. delay 1.000 sec  
 Pulse 45.0 degrees  
 Acq. time 1.049 sec  
 Width 31250.0 Hz  
 204 repetitions  
 OBSERVE C13, 125.6939697 MHz  
 DECOUPLE H1, 499.8787746 MHz  
 Power 45 dB  
 continuously on  
 WALTZ-16 modulated  
 DATA PROCESSING  
 Line broadening 0.5 Hz  
 FT size 65536  
 Total time 17 min

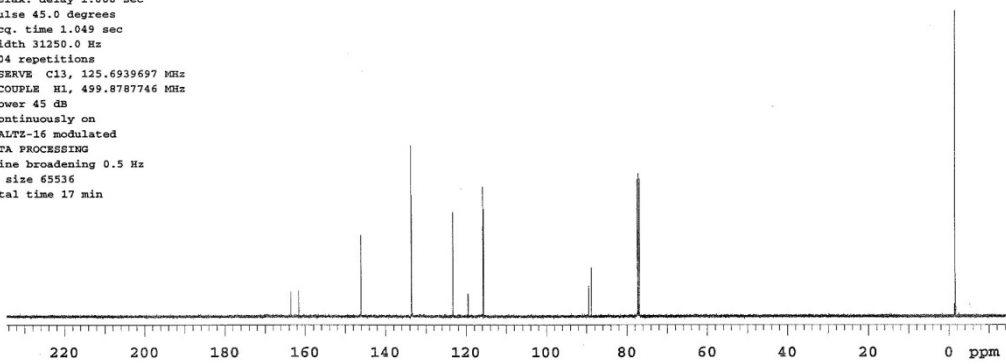

STANDARD FLUORINE PARAMETERS

Sample Name:

Data Collected on:  
nmr18-vnmrs500  
Archive directory:

Sample directory:

FidFile: FLUORINE

Pulse Sequence: FLUORINE (s2pul)  
Solvent: cd3cn  
Data collected on: Nov 1 2019

Temp. 25.0 C / 298.1 K  
Operator: Liu

Relax. delay 1.000 sec  
Pulse 30.0 degrees  
Acq. time 0.603 sec  
Width 108.7 kHz  
10 repetitions  
OBSERVE F19, 470.3561256 MHz  
DATA PROCESSING  
FT size 131072  
Total time 0 min 16 sec

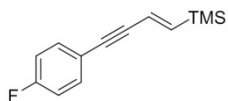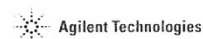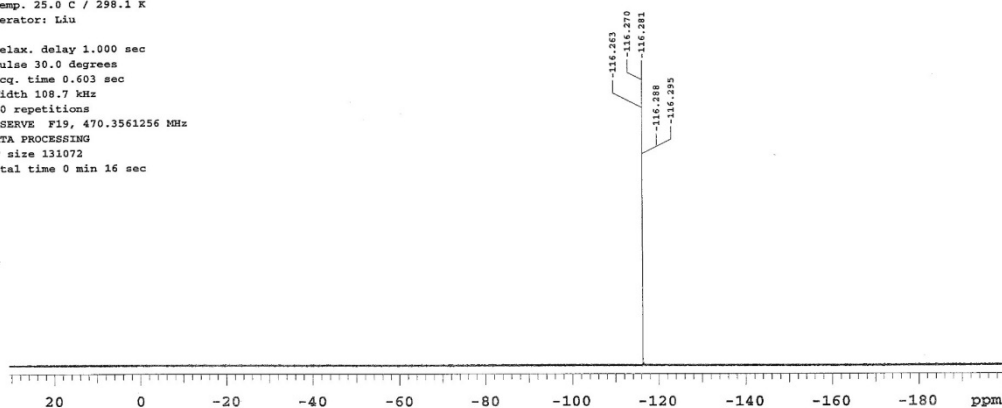

STANDARD PROTON PARAMETERS

Sample Name:

Data Collected on:  
nmr18-vnmrs500  
Archive directory:

Sample directory:

FidFile: PROTON

Pulse Sequence: PROTON (s2pul)  
Solvent: cdcl3  
Data collected on: Mar 17 2020

Temp. 25.0 C / 298.1 K  
Operator: Liu

Relax. delay 10.000 sec  
Pulse 45.0 degrees  
Acq. time 2.045 sec  
Width 8012.8 Hz  
6 repetitions  
OBSERVE H1, 499.8760066 MHz  
DATA PROCESSING  
FT size 32768  
Total time 1 min 12 sec

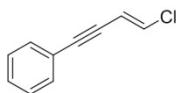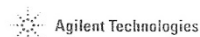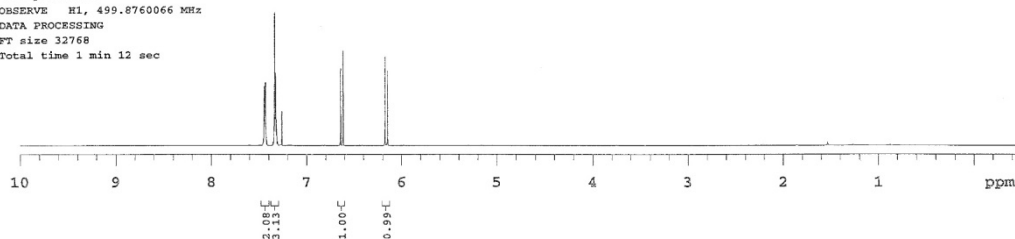

Sample Name:  
 Data Collected on:  
 Archive directory:  
 Sample directory:  
 FidFile: CARBON

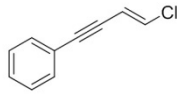

Pulse Sequence: CARBON (s2pul)  
 Solvent: cdcl3  
 Data collected on: Mar 17 2020  
 Temp. 25.0 C / 298.1 K  
 Operator: Liu

Relax. delay 1.000 sec  
 Pulse 45.0 degrees  
 Acq. time 1.049 sec  
 Width 31250.0 Hz  
 160 repetitions  
 OBSERVE C13, 125.6939027 MHz  
 DECOUPLE H1, 499.8785010 MHz  
 Power 44 dB  
 continuously on  
 WALTZ-16 modulated  
 DATA PROCESSING  
 Line broadening 0.5 Hz  
 FT size 65536  
 Total time 6 min 50 sec

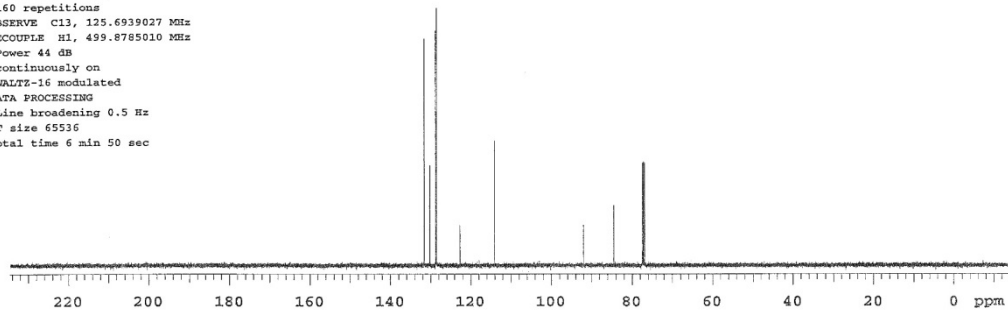

Sample Name:  
 Data Collected on:  
 Archive directory:  
 Sample directory:  
 FidFile: PROTON

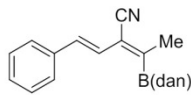

Pulse Sequence: PROTON (s2pul)  
 Solvent: cdcl3  
 Data collected on: Apr 14 2019  
 Temp. 25.0 C / 298.1 K  
 Operator: Liu

Relax. delay 10.000 sec  
 Pulse 45.0 degrees  
 Acq. time 2.045 sec  
 Width 8012.8 Hz  
 12 repetitions  
 OBSERVE H1, 499.8762752 MHz  
 DATA PROCESSING  
 FT size 32768  
 Total time 20 min

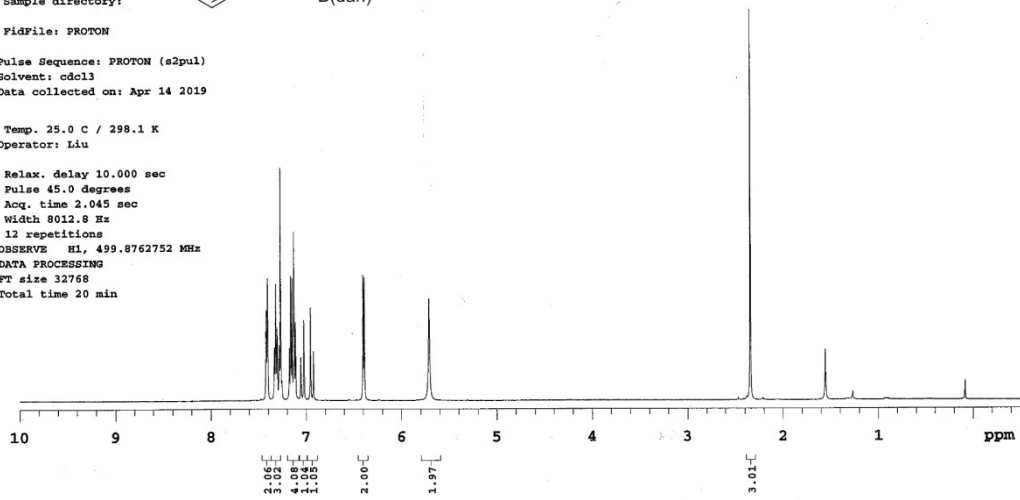



H

190m

Sample Name:

Data Collected on:  
nmr14-nmms400  
Archive directory:

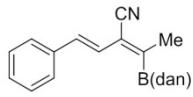

Sample directory:

FidFile: yz-3-190417-H-C

Pulse Sequence: CARBON (s2pul)  
Solvent: cdcl3  
Data collected on: Apr 17 2019

Temp. 25.0 C / 298.1 K  
Operator: Liu

Relax. delay 1.000 sec  
Pulse 45.0 degrees  
Acq. time 1.311 sec  
Width 25000.0 Hz  
16000 repetitions  
OBSERVE C13, 100.5208755 MHz  
DECOUPLE H1, 399.7666112 MHz  
Power 40 dB  
continuously on  
WALTZ-16 modulated  
DATA PROCESSING  
Line broadening 0.5 Hz  
FT size 65536  
Total time 10 hr, 16 min

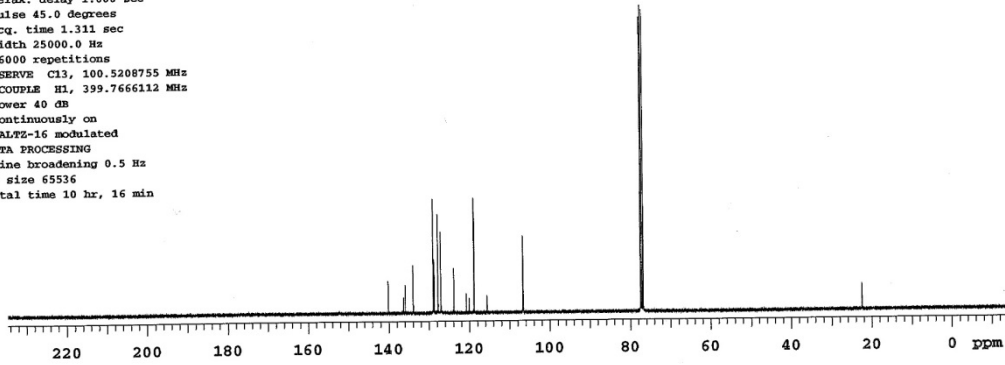

Sample Name:

Data Collected on:  
nmr11-inova500  
Archive directory:  
Sample directory:

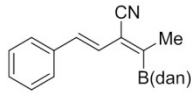

FidFile: B11

Pulse Sequence: s2pul  
Solvent: cdcl3  
Data collected on: Apr 18 2019

Temp. 25.0 C / 298.1 K  
Operator: Liu

Relax. delay 0.010 sec  
Pulse 45.0 degrees  
Acq. time 0.064 sec  
Width 32064.1 Hz  
2010 repetitions  
OBSERVE B11, 160.3467851 MHz  
DECOUPLE H1, 499.7745112 MHz  
Power 44 dB  
on during acquisition  
off during delay  
WALTZ-16 modulated  
DATA PROCESSING  
Line broadening 0.5 Hz  
FT size 4096  
Total time 13 min

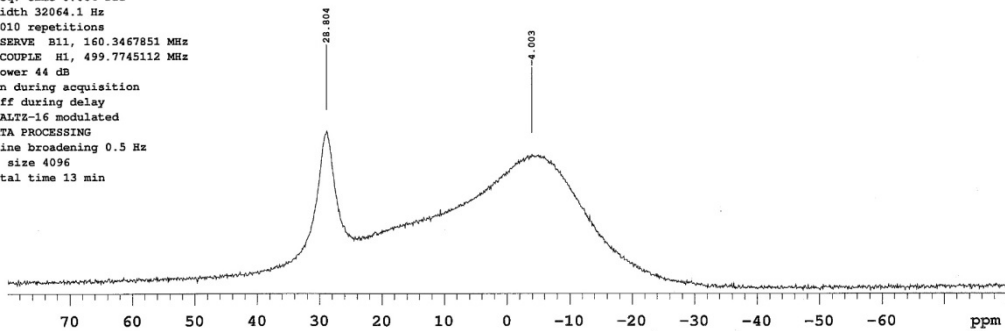

Agilent Technologies

Sample Name:  
 Data Collected on:  
 nmr18-vmrs500  
 Archive directory:  
 Sample directory:  
 FidFile: PROTON  
 Pulse Sequence: PROTON (s2pul)  
 Solvent: cdcl3  
 Data collected on: Mar 23 2019

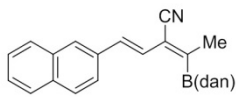

Temp. 25.0 C / 298.1 K  
 Operator: Liu

Relax. delay 10.000 sec  
 Pulse 45.0 degrees  
 Acq. time 2.045 sec  
 Width 8012.8 Hz  
 7 repetitions  
 OBSERVE H1, 499.8808020 MHz  
 DATA PROCESSING  
 FT size 32768  
 Total time 20 min

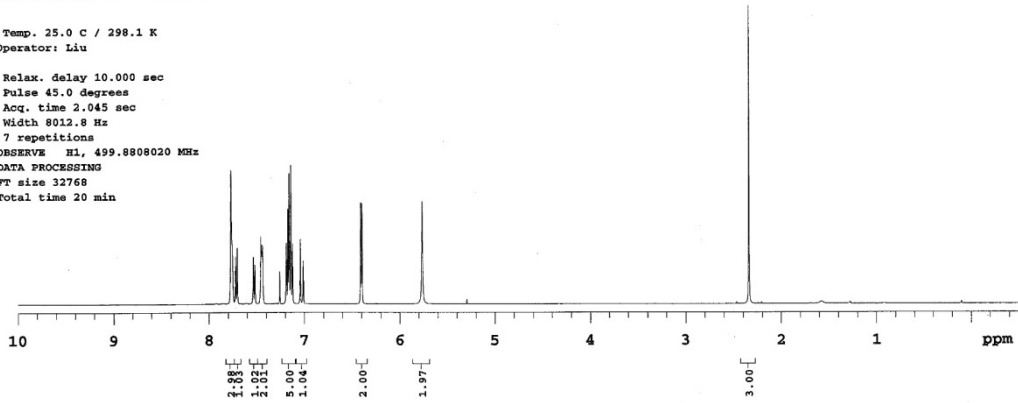

Sample Name:  
 Data Collected on:  
 nmr18-vmrs500  
 Archive directory:  
 Sample directory:  
 FidFile: yz-3-190320-2-naph-C  
 Pulse Sequence: CARBON (s2pul)  
 Solvent: cdcl3  
 Data collected on: Mar 24 2019

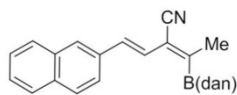

Temp. 25.0 C / 298.1 K  
 Operator: Liu

Relax. delay 1.000 sec  
 Pulse 45.0 degrees  
 Acq. time 1.049 sec  
 Width 31250.0 Hz  
 936 repetitions  
 OBSERVE C13, 125.6951127 MHz  
 DECOUPLE H1, 499.8833015 MHz  
 Power 43 dB  
 continuously on  
 WALTZ-16 modulated  
 DATA PROCESSING  
 Line broadening 1.0 Hz  
 FT size 65536  
 Total time 56 hr, 54 min

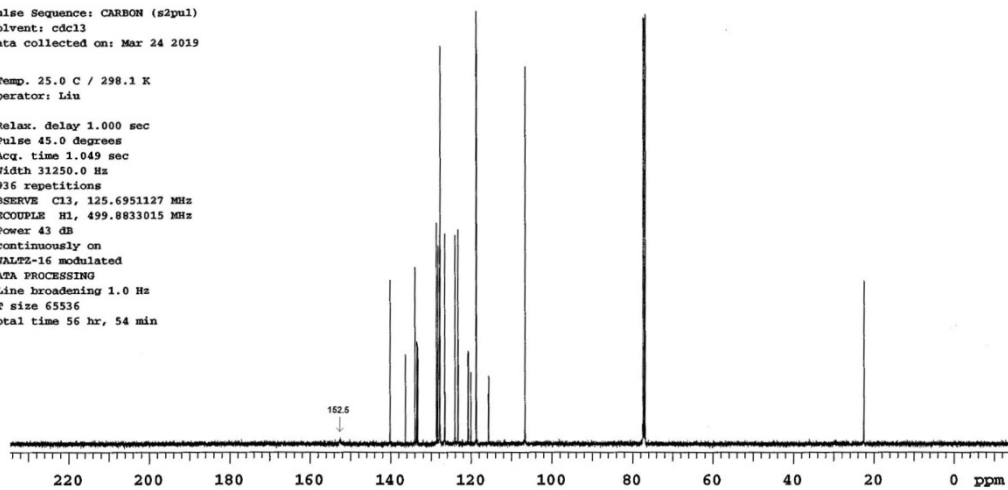

2-naph

Sample Name:

Data Collected on:  
nmr11-inova500  
Archive directory:

Sample directory:

FidFile: B11

Pulse Sequence: s2pul  
Solvent: cd2cl2  
Data collected on: Nov 24 2018

Temp. 25.0 C / 298.1 K  
Operator: Liu

Relax. delay 0.010 sec  
Pulse 45.0 degrees  
Acq. time 0.064 sec  
Width 32064.1 Hz  
2044 repetitions  
OBSERVE B11, 160.3467799 MHz  
DATA PROCESSING  
Line broadening 0.5 Hz  
FT size 4096  
Total time 13 min

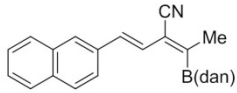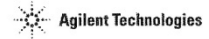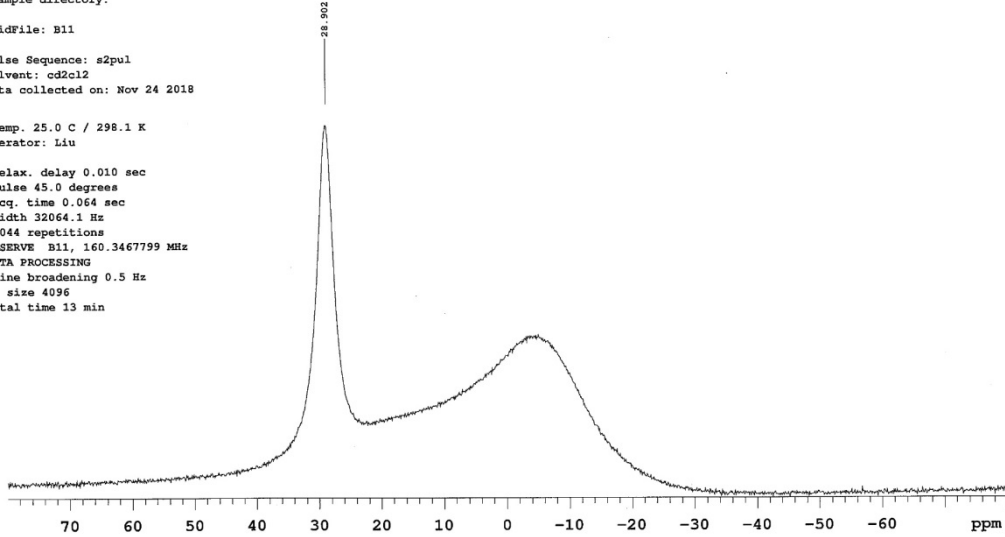

Sample Name:

Data Collected on:  
nmr19-vnmrs600  
Archive directory:

Sample directory:

FidFile: PROTON

Pulse Sequence: PROTON (s2pul)  
Solvent: cdcl3  
Data collected on: May 27 2019

Temp. 25.0 C / 298.1 K  
Operator: Liu

Relax. delay 10.000 sec  
Pulse 45.0 degrees  
Acq. time 1.704 sec  
Width 9615.4 Hz  
6 repetitions  
OBSERVE H1, 599.6809043 MHz  
DATA PROCESSING  
FT size 32768  
Total time 1 min 57 sec

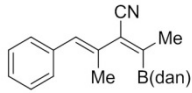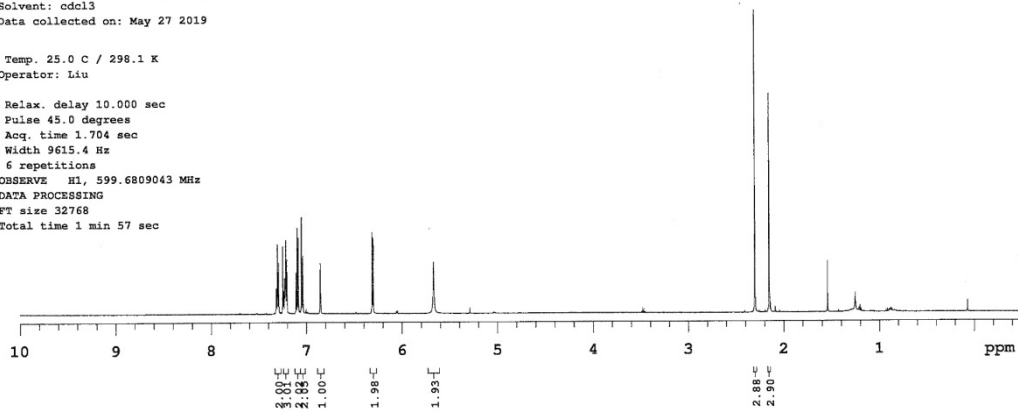

Phco2CH2CH2enyne

Sample Name:

Data Collected on:

nmr18-vnmrs500

Archive directory:

Sample directory:

FidFile: yz-3-190528-betame-point2-C

Pulse Sequence: CARBON (s2pul)

Solvent: cd2cl2

Data collected on: May 28 2019

Temp. 25.0 C / 298.1 K

Operator: Liu

Relax. delay 1.000 sec

Pulse 45.0 degrees

Acq. time 1.049 sec

Width 31250.0 Hz

808 repetitions

OBSERVE C13, 125.6939707 MHz

DECOUPLE H1, 499.8797344 MHz

Power 43 dB

continuously on

WALTZ-16 modulated

DATA PROCESSING

Line broadening 0.5 Hz

FT size 65536

Total time 34 min

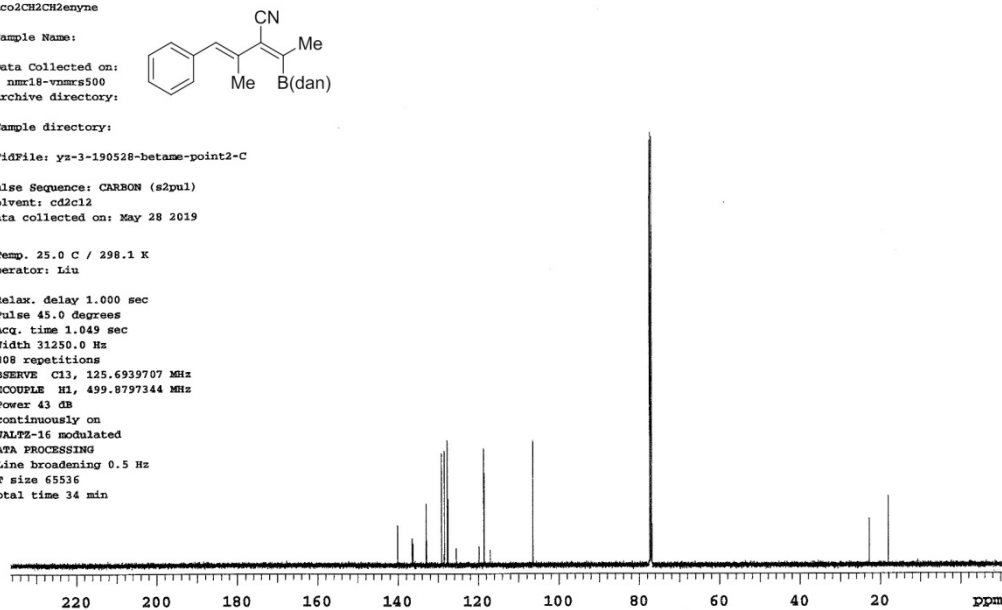

Sample Name:

Data Collected on:

nmr11-inova500

Archive directory:

Sample directory:

FidFile: B11

Pulse Sequence: s2pul

Solvent: cdcl3

Data collected on: May 28 2019

Temp. 25.0 C / 298.1 K

Operator: Liu

Relax. delay 0.010 sec

Pulse 45.0 degrees

Acq. time 0.064 sec

Width 32064.1 Hz

1000 repetitions

OBSERVE B11, 160.3467538 MHz

DATA PROCESSING

Line broadening 0.5 Hz

FT size 4096

Total time 1 min 23 sec

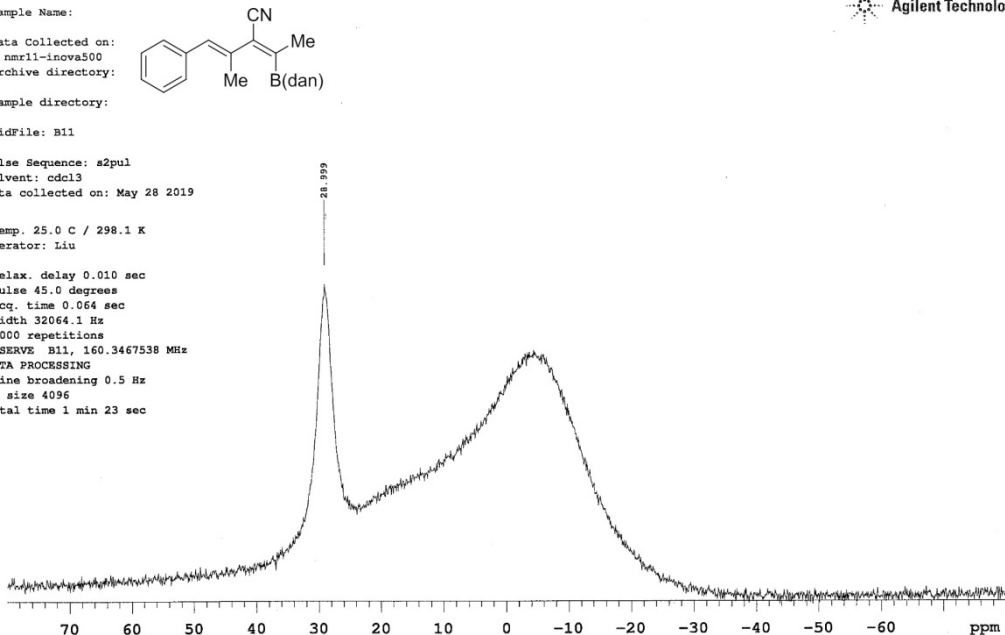

Agilent Technologies

Sample Name:

Data Collected on:

Archive directory:

Sample directory:

FidFile: PROTON

Pulse Sequence: PROTON (s2pul)

Solvent: cdcl3

Data collected on: Apr 17 2019

Temp. 25.0 C / 298.1 K

Operator: Liu

Relax. delay 10.000 sec

Pulse 45.0 degrees

Acq. time 1.704 sec

Width 9615.4 Hz

14 repetitions

OBSERVE H1, 599.6809043 MHz

DATA PROCESSING

FT size 32768

Total time 7 min 48 sec

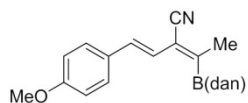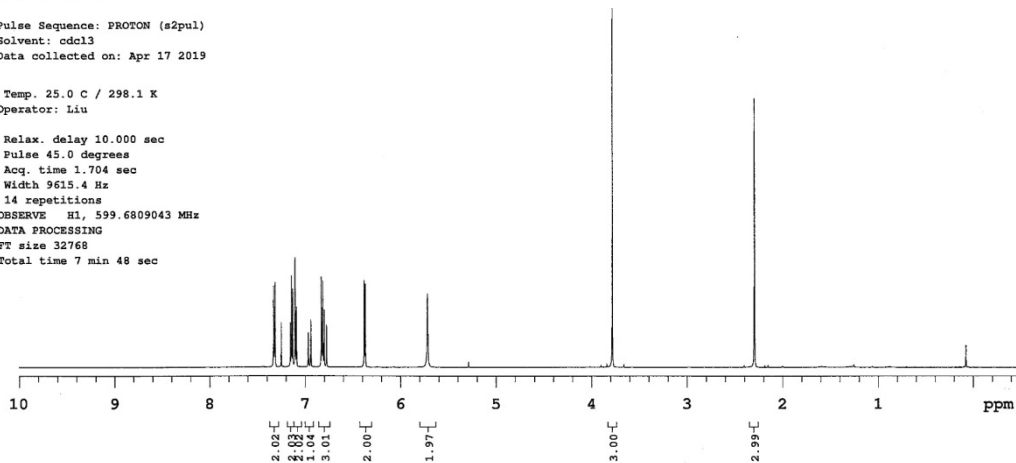

Sample Name:

Data Collected on:

Archive directory:

Sample directory:

FidFile: yz-3-190418-OMe-C

Pulse Sequence: CARBON (s2pul)

Solvent: cdcl3

Data collected on: Apr 17 2019

Temp. 25.0 C / 298.1 K

Operator: Liu

Relax. delay 1.000 sec

Pulse 45.0 degrees

Acq. time 0.865 sec

Width 37878.8 Hz

15000 repetitions

OBSERVE C13, 150.7898628 MHz

DECOUPLE H1, 599.6839027 MHz

Power 42 dB

continuously on

WALTZ-16 modulated

DATA PROCESSING

Line broadening 0.5 Hz

FT size 65536

Total time 7 hr, 46 min

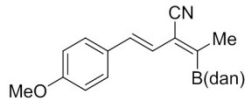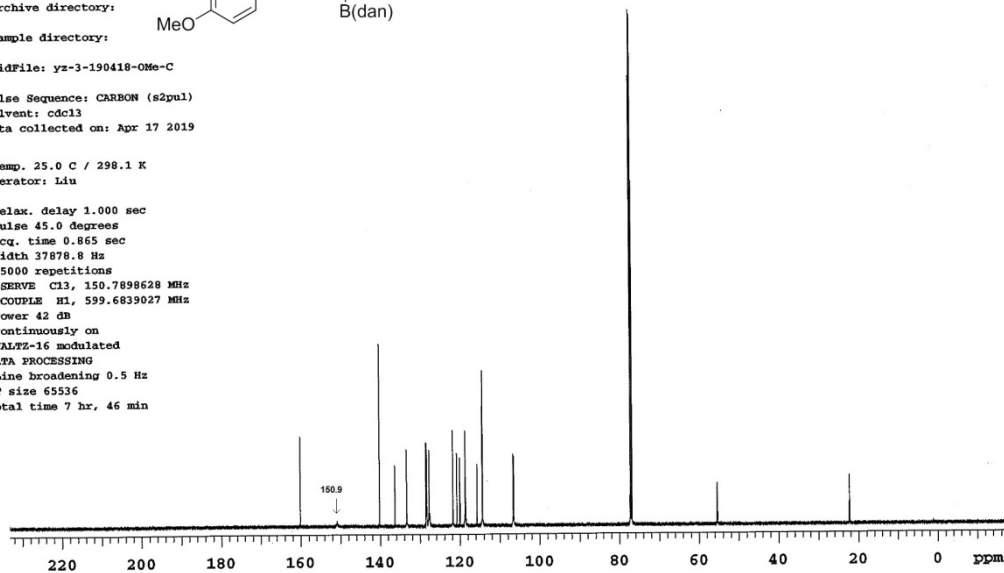

Sample Name:  
 Data Collected on:  
 Archive directory:  
 Sample directory:

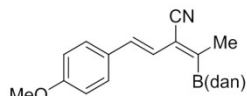

FidFile: B11  
 Pulse Sequence: s2pul  
 Solvent: cdcl3  
 Data collected on: Apr 17 2019

Temp. 25.0 C / 298.1 K  
 Operator: Liu

Relax. delay 0.010 sec  
 Pulse 45.0 degrees  
 Acq. time 0.064 sec  
 Width 32064.1 Hz  
 2082 repetitions  
 OBSERVE B11, 160.3467537 MHz  
 DATA PROCESSING  
 Line broadening 0.5 Hz  
 FT size 4096  
 Total time 2 hr, 18 min

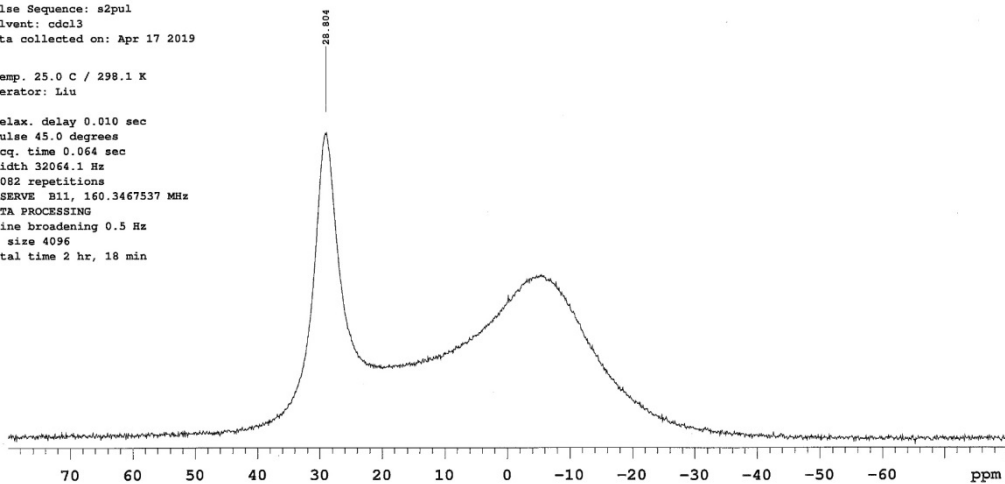

Sample Name:  
 Data Collected on:  
 Archive directory:  
 Sample directory:

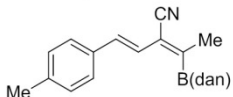

FidFile: PROTON  
 Pulse Sequence: PROTON (s2pul)  
 Solvent: cdcl3  
 Data collected on: Mar 19 2019

Temp. 25.0 C / 298.1 K  
 Operator: Liu

Relax. delay 10.000 sec  
 Pulse 45.0 degrees  
 Acq. time 2.045 sec  
 Width 8012.8 Hz  
 8 repetitions  
 OBSERVE H1, 499.8808020 MHz  
 DATA PROCESSING  
 FT size 32768  
 Total time 8 min 2 sec

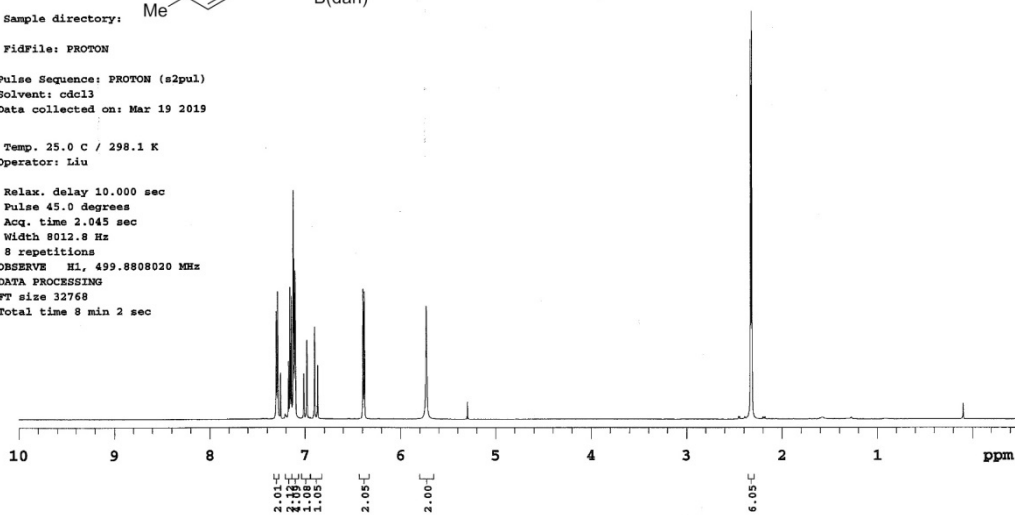

Me

14000

Sample Name:

Data Collected on:  
nmr18-vmm8500  
Archive directory:

Sample directory:

FidFile: yz-3-181022-Me-column-C

Pulse Sequence: CARBON (s2pul)  
Solvent: cdcl3  
Data collected on: Oct 22 2018

Temp. 25.0 C / 298.1 K  
Operator: Liu

Relax. delay 1.000 sec  
Pulse 45.0 degrees  
Acq. time 1.049 sec  
Width 31250.0 Hz  
382 repetitions  
OBSERVE C13, 125.6951079 MHz  
DECOUPLE H1, 499.8833015 MHz  
Power 43 dB  
continuously on  
WALTZ-16 modulated  
DATA PROCESSING  
Line broadening 0.5 Hz  
FT size 65536  
Total time 34 min

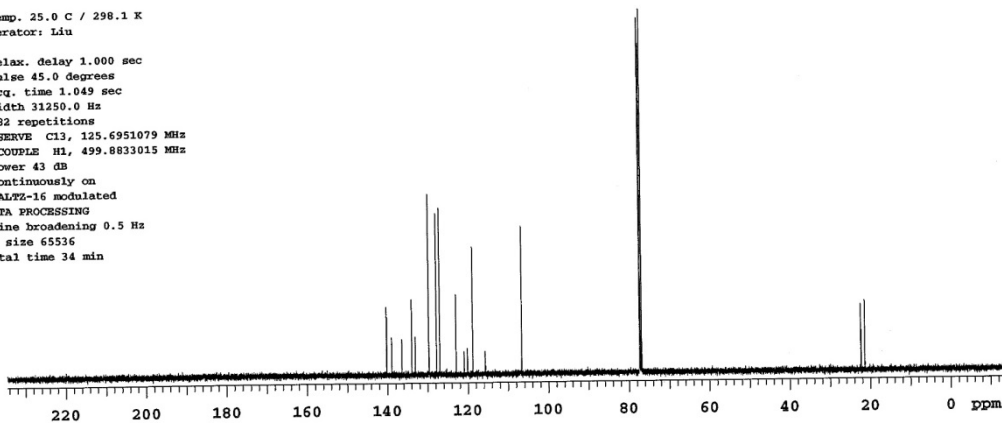

Me

Agilent Technologies

Sample Name:

Data Collected on:  
nmr11-inova500  
Archive directory:

Sample directory:

FidFile: B11

Pulse Sequence: s2pul  
Solvent: cdcl3  
Data collected on: Oct 22 2018

Temp. 25.0 C / 298.1 K  
Operator: Liu

Relax. delay 0.010 sec  
Pulse 45.0 degrees  
Acq. time 0.064 sec  
Width 32064.1 Hz  
1000 repetitions  
OBSERVE B11, 160.3462527 MHz  
DATA PROCESSING  
Line broadening 0.5 Hz  
FT size 4096  
Total time 1 min 23 sec

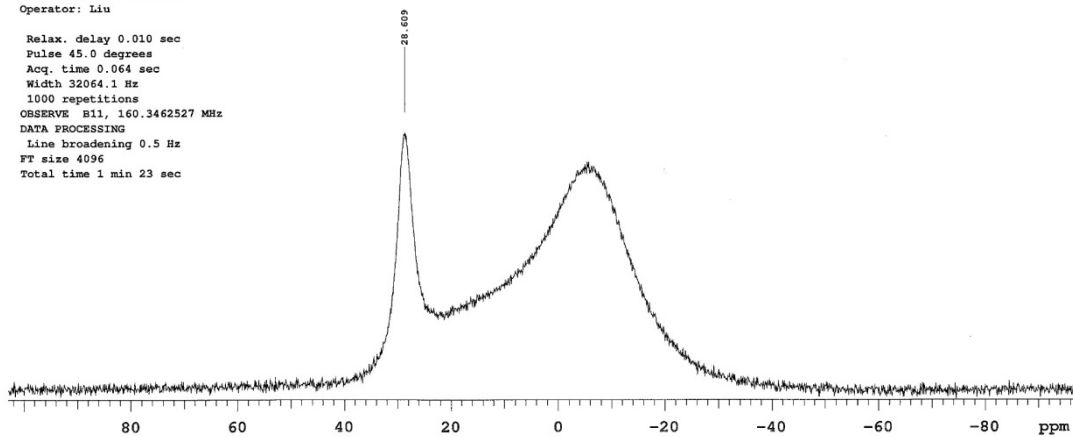

Sample Name:

Data Collected on:  
nmr19-vnmrs600  
Archive directory:

Sample directory:

FidFile: PROTON

Pulse Sequence: PROTON (s2pul)  
Solvent: thf  
Data collected on: May 7 2019

Temp. 25.0 C / 298.1 K  
Operator: Liu

Relax. delay 10.000 sec  
Pulse 45.0 degrees  
Acq. time 1.704 sec  
Width 9615.4 Hz  
6 repetitions  
OBSERVE H1, 599.6830991 MHz  
DATA PROCESSING  
FT size 32768  
Total time 19 min

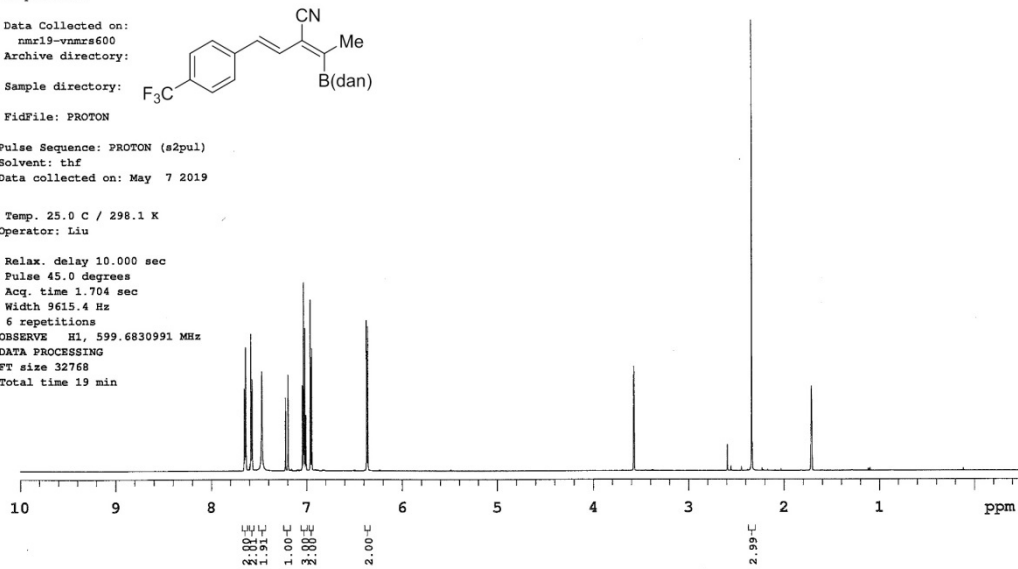

Sample Name:

Data Collected on:  
nmr19-vnmrs600  
Archive directory:

Sample directory:

FidFile: yz-3-C

Pulse Sequence: CARBON (s2pul)  
Solvent: thf  
Data collected on: May 7 2019

Temp. 25.0 C / 298.1 K  
Operator: Liu

Relax. delay 1.000 sec  
Pulse 45.0 degrees  
Acq. time 0.865 sec  
Width 37878.8 Hz  
16416 repetitions  
OBSERVE C13, 150.7903117 MHz  
DECOUPLE H1, 599.6860975 MHz  
Power 42 dB  
continuously on  
WALTZ-16 modulated  
DATA PROCESSING  
Line broadening 0.5 Hz  
FT size 65536  
Total time 8 hr, 42 min

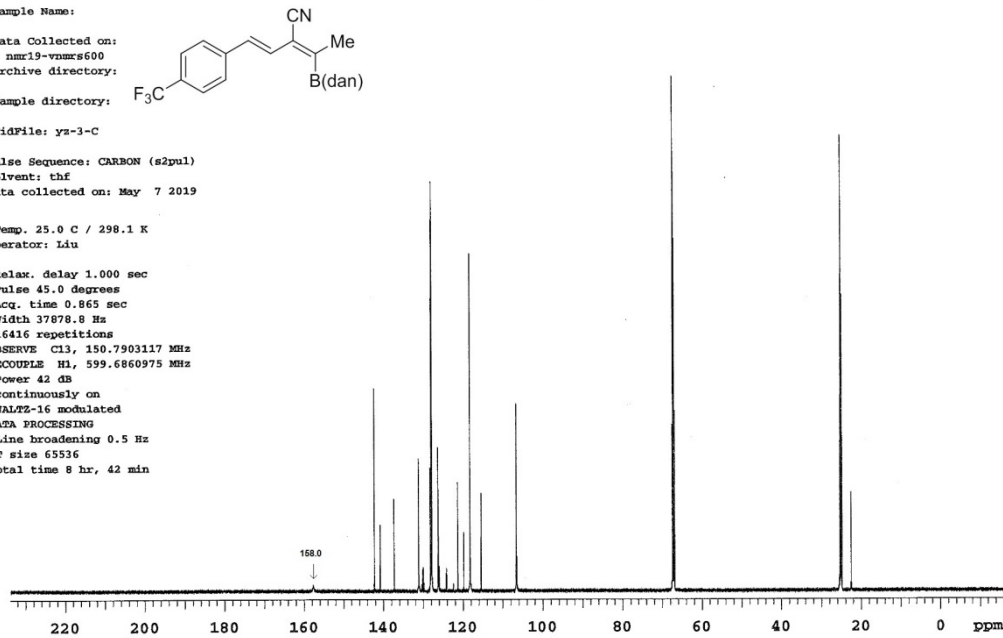



Sample Name:

Data Collected on:  
nmr11-incva500  
Archive directory:

Sample directory: F<sub>3</sub>C  
FidFile: B11

Pulse Sequence: s2pul  
Solvent: thf  
Data collected on: May 7 2019

Temp. 25.0 C / 298.1 K  
Operator: Liu

Relax. delay 0.010 sec  
Pulse 45.0 degrees  
Acq. time 0.064 sec  
Width 32064.1 Hz  
1036 repetitions  
OBSERVE B11, 140.3467145 MHz  
DATA PROCESSING  
Line broadening 0.5 Hz  
FT size 4096  
Total time 13 min

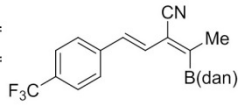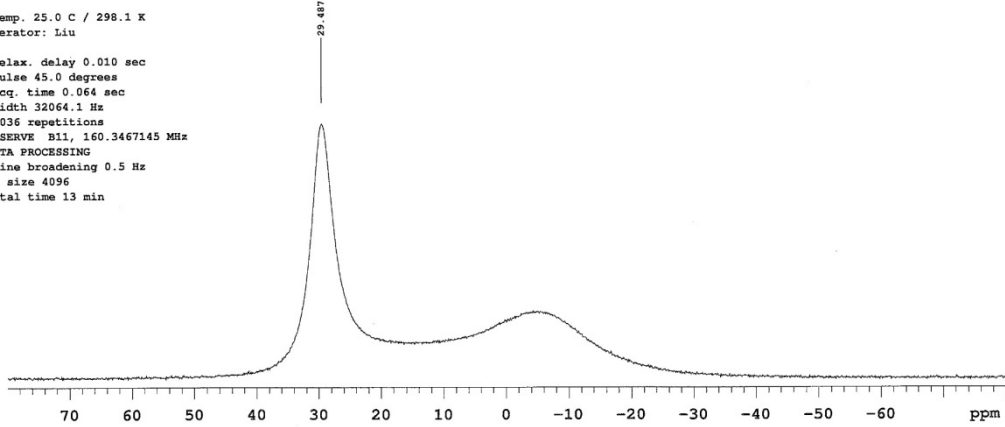

STANDARD FLUORINE PARAMETERS

Sample Name:

Data Collected on:  
nmr19-vnmrs600  
Archive directory:

Sample directory: F<sub>3</sub>C  
FidFile: FLUORINE

Pulse Sequence: FLUORINE (s2pul)  
Solvent: thf  
Data collected on: May 7 2019

Temp. 25.0 C / 298.1 K  
Operator: Liu

Relax. delay 1.000 sec  
Pulse 30.0 degrees  
Acq. time 0.996 sec  
Width 131.6 kHz  
12 repetitions  
OBSERVE F19, 564.2658812 MHz  
DATA PROCESSING  
FT size 262144  
Total time 3 min 20 sec

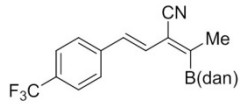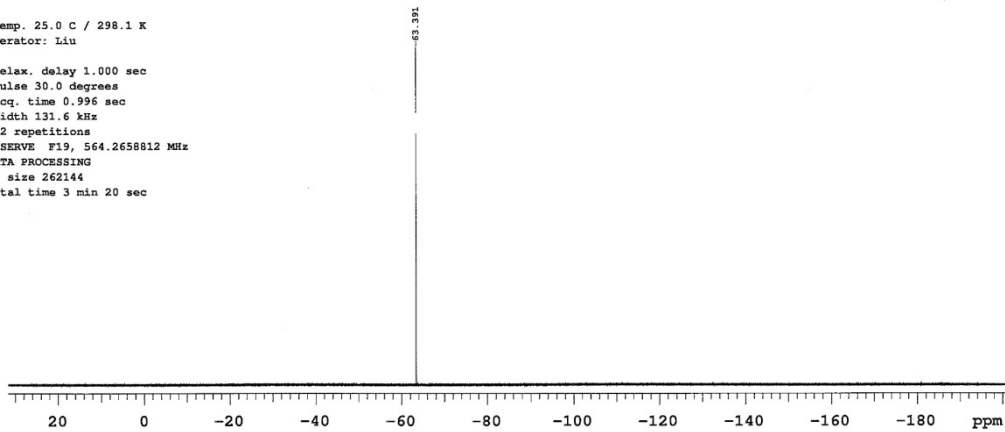



P-F

Sample Name:

Data Collected on:

Archive directory:

Sample directory:

FidFile: B11

Pulse Sequence: s2pul

Solvent: cdcl3

Data collected on: Jan 25 2019

Temp. 25.0 C / 298.1 K

Operator: Liu

Relax. delay 0.010 sec

Pulse 45.0 degrees

Acq. time 0.064 sec

Width 32064.1 Hz

1132 repetitions

OBSERVE B11, 160.3469104 MHz

DATA PROCESSING

Line broadening 0.5 Hz

FT size 4096

Total time 13 min

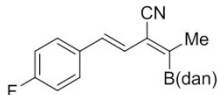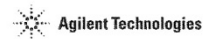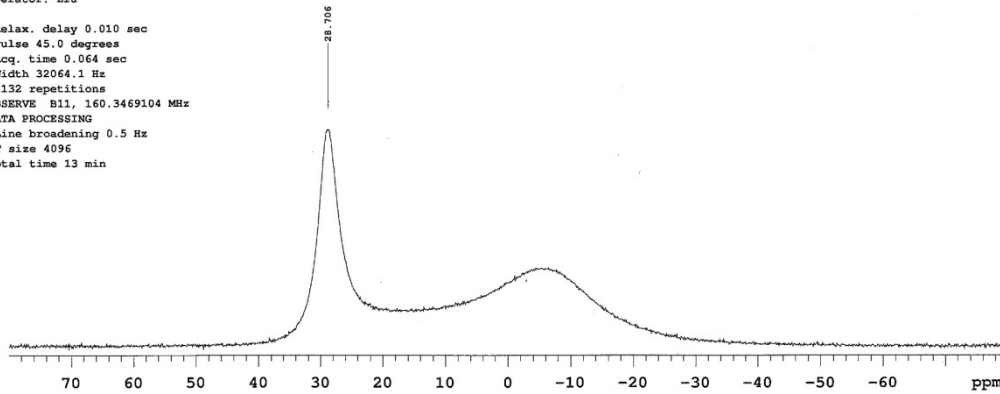

P-F

Sample Name:

Data Collected on:

Archive directory:

Sample directory:

FidFile: yz-3-190123-F-F

Pulse Sequence: FLUORINE (s2pul)

Solvent: cdcl3

Data collected on: Jan 23 2019

Temp. 25.0 C / 298.1 K

Operator: Liu

Relax. delay 1.000 sec

Pulse 30.0 degrees

Acq. time 0.996 sec

Width 131.6 kHz

16 repetitions

OBSERVE F19, 564.2638160 MHz

DATA PROCESSING

FT size 262144

Total time 33 min

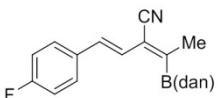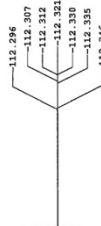

p-Cl

Sample Name:

Data Collected on:

nmr19-nmrs600

Archive directory:

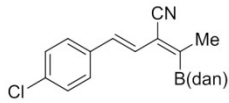

Sample directory:

FidFile: yz-3-190202-Cl-H

Pulse Sequence: PROTON (s2pul)  
Solvent: cdcl3  
Data collected on: Feb 2 2019

Temp. 25.0 C / 298.1 K  
Operator: Liu

Relax. delay 10.000 sec  
Pulse 45.0 degrees  
Acq. time 1.704 sec  
Width 9615.4 Hz  
8 repetitions  
OBSERVE H1, 599.6809043 MHz  
DATA PROCESSING  
FT size 32768  
Total time 1 min 34 sec

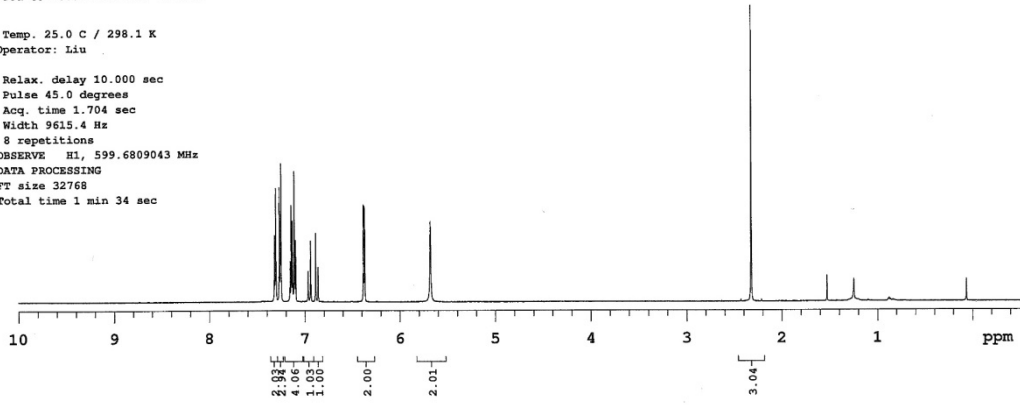

Sample Name:

Data Collected on:

nmr19-nmrs600

Archive directory:

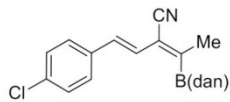

Sample directory:

FidFile: yz-3-190506-Cl-C

Pulse Sequence: CARBON (s2pul)  
Solvent: cdcl3  
Data collected on: May 6 2019

Temp. 25.0 C / 298.1 K  
Operator: Liu

Relax. delay 1.000 sec  
Pulse 45.0 degrees  
Acq. time 0.865 sec  
Width 37878.8 Hz  
15000 repetitions  
OBSERVE C13, 150.7898581 MHz  
DECOUPLE H1, 599.6839027 MHz  
Power 42 dB  
continuously on  
WALTZ-16 modulated  
DATA PROCESSING  
Line broadening 0.5 Hz  
FT size 65536  
Total time 7 hr, 46 min

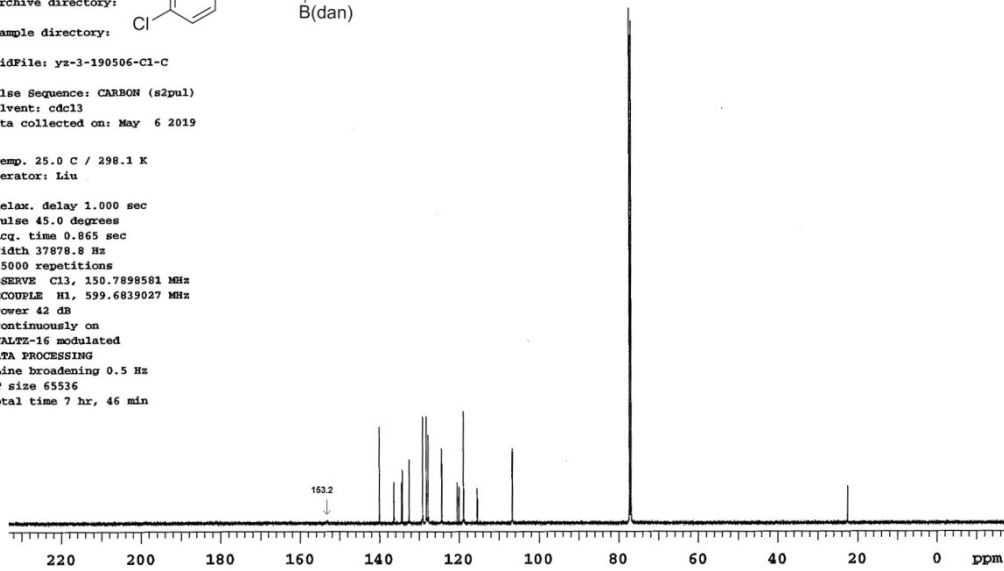

p-Cl

Sample Name:

Data Collected on:  
nmr11-inova500  
Archive directory:

Sample directory:

FidFile: B11

Pulse Sequence: s2pul  
Solvent: cdcl3  
Data collected on: Feb 4 2019

Temp. 25.0 C / 298.1 K  
Operator: Liu

Relax. delay 0.010 sec  
Pulse 45.0 degrees  
Acq. time 0.064 sec  
Width 32064.1 Hz  
2948 repetitions  
OBSERVE B11, 160.3466442 MHz  
DATA PROCESSING  
Line broadening 0.5 Hz  
FT size 4096  
Total time 2 hr, 18 min

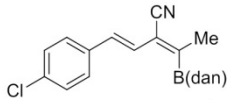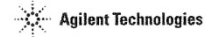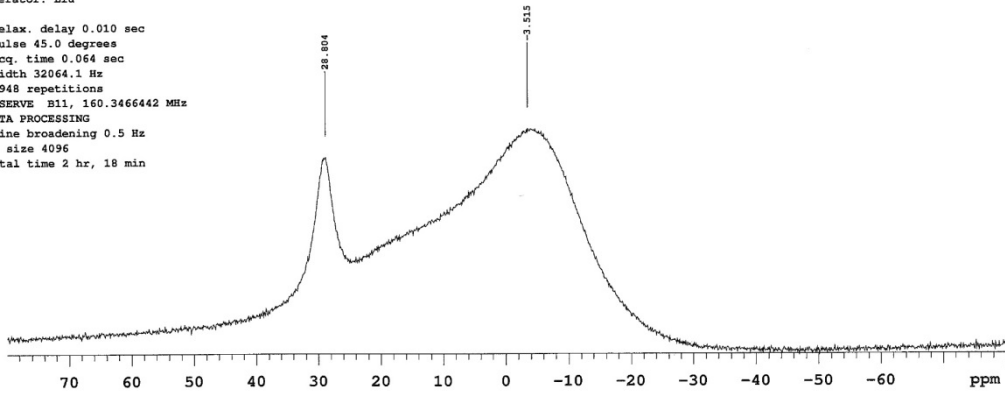

Sample Name:

Data Collected on:  
nmr18-vmms500  
Archive directory:

Sample directory:

FidFile: PROTON

Pulse Sequence: PROTON (s2pul)  
Solvent: chf  
Data collected on: Jun 9 2019

Temp. 25.0 C / 298.1 K  
Operator: Liu

Relax. delay 10.000 sec  
Pulse 45.0 degrees  
Acq. time 2.045 sec  
Width 8012.8 Hz  
8 repetitions  
OBSERVE H1, 499.8790445 MHz  
DATA PROCESSING  
FT size 32768  
Total time 1 min 36 sec

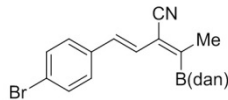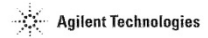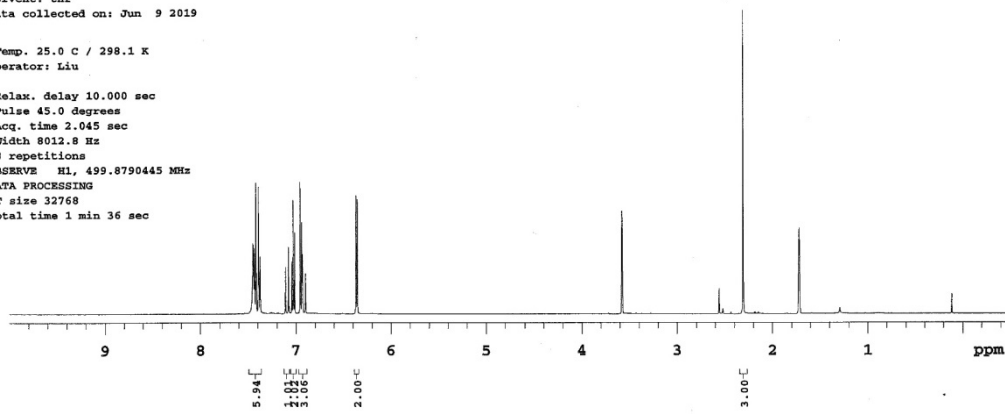

Sample Name:

Data Collected on:  
nmr18-nmms500  
Archive directory:  
Sample directory:

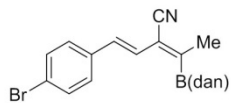

FidFile: yz-3-190609-pbr-thf-C

Pulse Sequence: CARBON (s2pul)  
Solvent: thf  
Data collected on: Jun 9 2019

Temp. 25.0 C / 298.1 K  
Operator: Liu

Relax. delay 1.000 sec  
Pulse 45.0 degrees  
Acq. time 1.049 sec  
Width 31250.0 Hz

404 repetitions  
OBSERVE C13, 125.6945602 MHz  
DECOUPLE H1, 499.8806042 MHz  
Power 43 dB  
continuously on  
WALTZ-16 modulated  
DATA PROCESSING  
Line broadening 0.5 Hz  
FT size 65536  
Total time 5 hr, 41 min

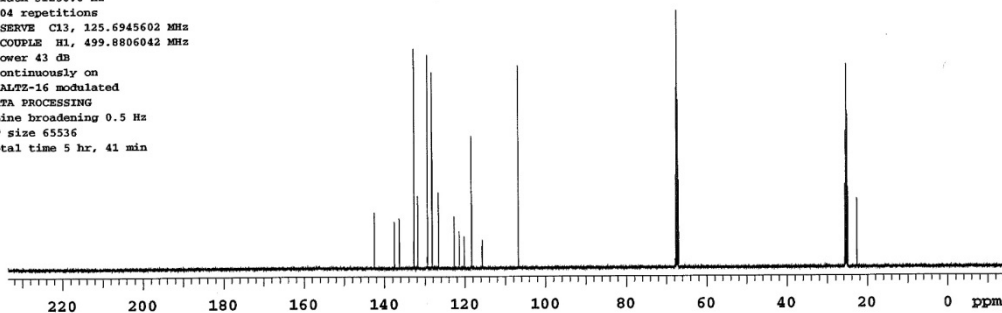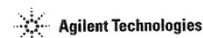

Sample Name:

Data Collected on:  
nmr11-inova500  
Archive directory:  
Sample directory:

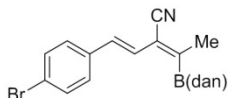

FidFile: B11

Pulse Sequence: s2pul  
Solvent: thf  
Data collected on: Jun 9 2019

Temp. 25.0 C / 298.1 K  
Operator: Liu

Relax. delay 0.010 sec  
Pulse 45.0 degrees  
Acq. time 0.064 sec  
Width 32064.1 Hz

1000 repetitions  
OBSERVE B11, 160.3466205 MHz  
DATA PROCESSING  
Line broadening 0.5 Hz  
FT size 4096  
Total time 1 min 23 sec

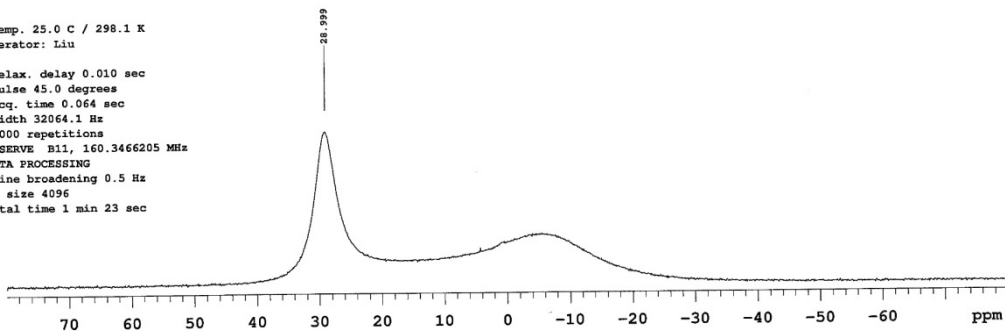

Sample Name:

Data Collected on:  
nmr19-vnmrs600

Archive directory:

Sample directory:

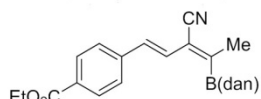

FidFile: PROTON

Pulse Sequence: PROTON (s2pul)  
Solvent: cdcl3  
Data collected on: May 30 2019

Temp. 25.0 C / 298.1 K  
Operator: Liu

Relax. delay 10.000 sec  
Pulse 45.0 degrees  
Acq. time 1.704 sec  
Width 9615.4 Hz  
8 repetitions  
OBSERVE H1, 599.6809043 MHz  
DATA PROCESSING  
FT size 32768  
Total time 1 min 34 sec

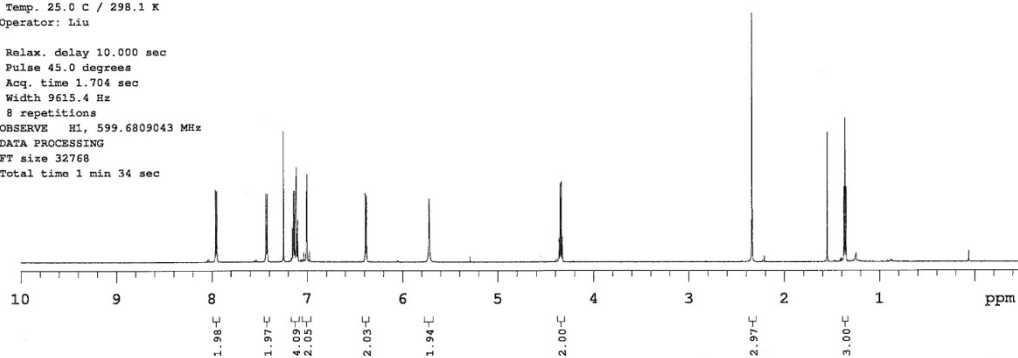

Sample Name:

Data Collected on:  
nmr19-vnmrs600

Archive directory:

Sample directory:

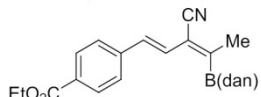

FidFile: CARBON

Pulse Sequence: CARBON (s2pul)  
Solvent: cdcl3  
Data collected on: May 30 2019

Temp. 25.0 C / 298.1 K  
Operator: Liu

Relax. delay 1.000 sec  
Pulse 45.0 degrees  
Acq. time 0.865 sec  
Width 37878.8 Hz  
5020 repetitions  
OBSERVE C13, 150.7898593 MHz  
DECOUPLE H1, 599.6839027 MHz  
Power 42 db  
continuously on  
WALTZ-16 modulated  
DATA PROCESSING  
Line broadening 0.5 Hz  
FT size 65536  
Total time 5 hr, 10 min

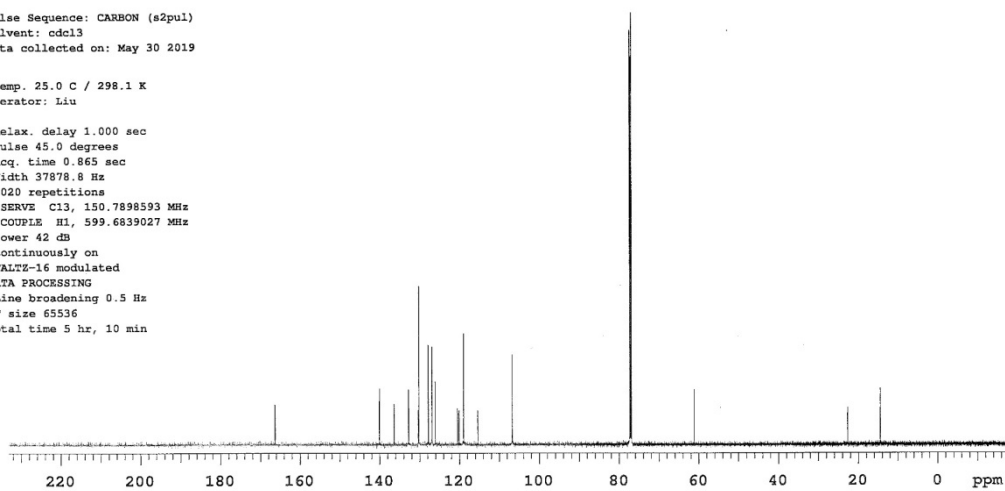

Sample Name:  
 Data Collected on:  
 Archive directory:  
 Sample directory:

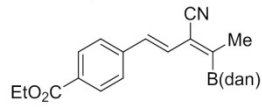

FidFile: B11  
 Pulse Sequence: s2pul  
 Solvent: cdcl3  
 Data collected on: May 31 2019

Temp. 25.0 C / 298.1 K  
 Operator: Liu

Relax. delay 0.010 sec  
 Pulse 45.0 degrees  
 Acq. time 0.064 sec  
 Width 32064.1 Hz  
 3646 repetitions  
 OBSERVE B11, 160.3467538 MHz  
 DATA PROCESSING  
 Line broadening 0.5 Hz  
 FT size 4096  
 Total time 13 min

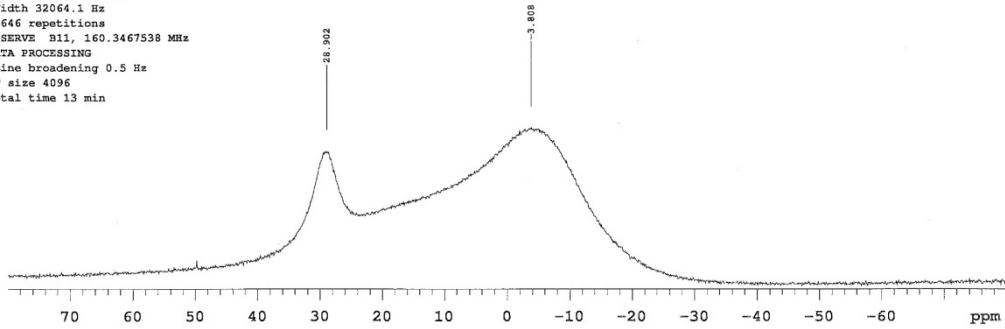

Sample Name:

Data Collected on:  
 Archive directory:

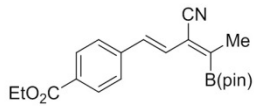

FidFile: PROTON  
 Pulse Sequence: PROTON (s2pul)  
 Solvent: cdcl3  
 Data collected on: Jun 1 2019

Temp. 25.0 C / 298.1 K  
 Operator: Liu

Relax. delay 10.000 sec  
 Pulse 45.0 degrees  
 Acq. time 1.704 sec  
 Width 9615.4 Hz  
 8 repetitions  
 OBSERVE H1, 599.6809043 MHz  
 DATA PROCESSING  
 FT size 32768  
 Total time 1 min 34 sec

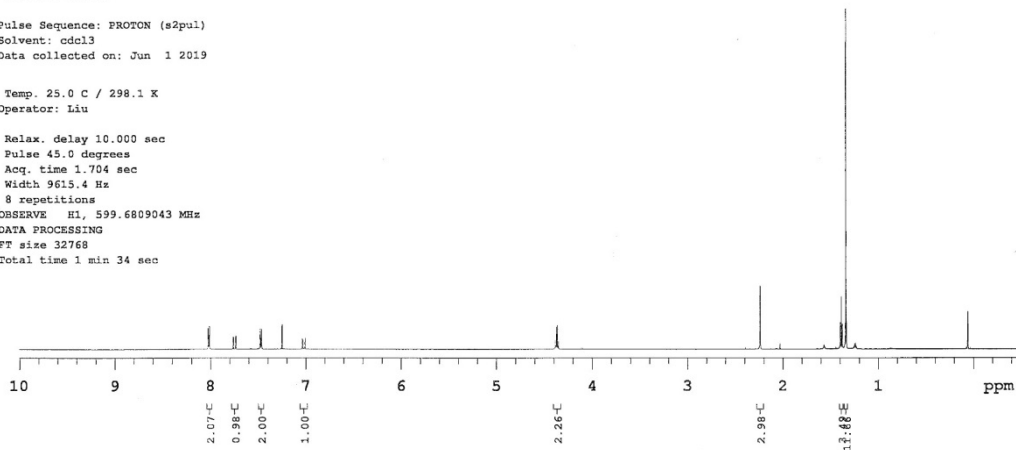



Sample Name:

Data Collected on:  
nmr19-vmrs600

Archive directory:

Sample directory:

FidFile: CARBON

Pulse Sequence: CARBON (s2pul)  
Solvent: cdcl3  
Data collected on: Jun 1 2019

Temp. 25.0 C / 298.1 K  
Operator: Liu

Relax. delay 1.000 sec  
Pulse 45.0 degrees  
Acq. time 0.865 sec  
Width 37878.8 Hz

4092 repetitions  
OBSERVE C13, 150.7898581 MHz  
DECOUPLE H1, 599.6839027 MHz  
Power 42 dB  
continuously on  
WALTZ-16 modulated  
DATA PROCESSING  
Line broadening 0.5 Hz  
FT size 65536  
Total time 5 hr, 10 min

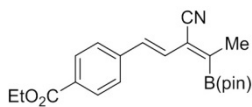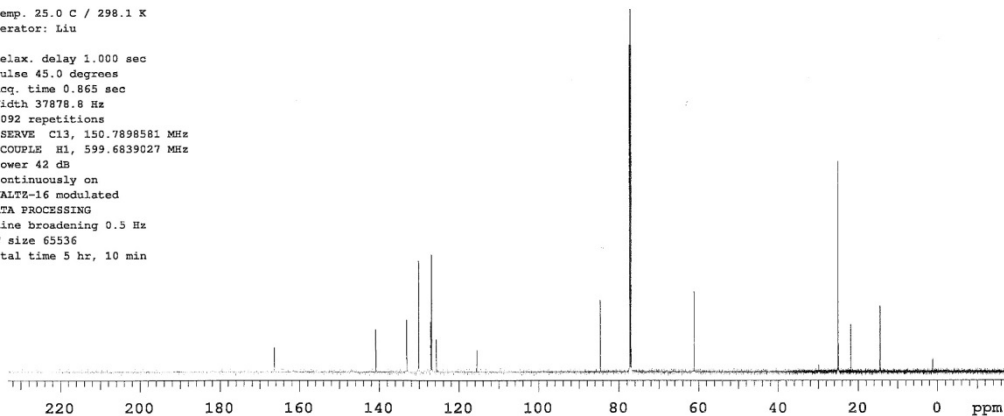

Sample Name:

Data Collected on:  
nmr11-inova500

Archive directory:

Sample directory:

FidFile: H11

Pulse Sequence: s2pul  
Solvent: cdcl3  
Data collected on: Jun 2 2019

Temp. 25.0 C / 298.1 K  
Operator: Liu

Relax. delay 0.010 sec  
Pulse 45.0 degrees  
Acq. time 0.064 sec  
Width 32064.1 Hz

1000 repetitions  
OBSERVE H11, 160.3464720 MHz  
DATA PROCESSING  
Line broadening 0.5 Hz  
FT size 4096  
Total time 1 min 23 sec

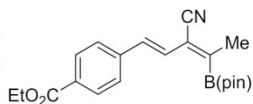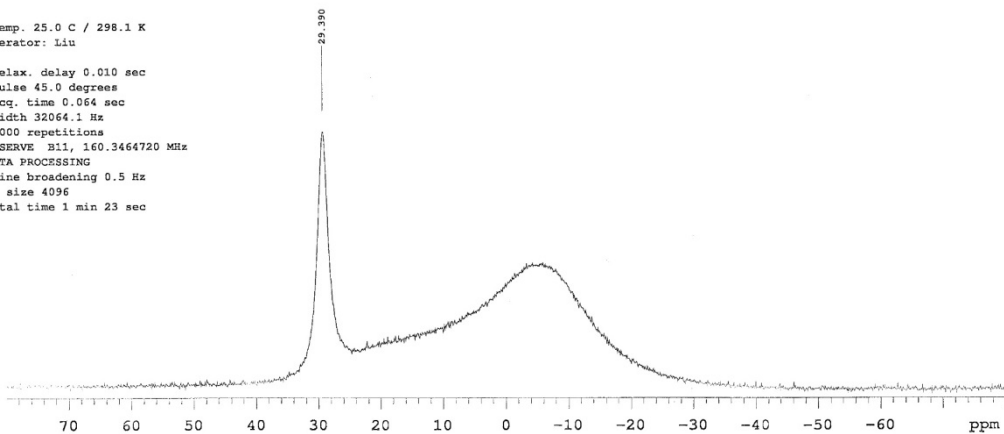

Agilent Technologies

Sample Name:  
 Data Collected on: nmr18-vnmrs500  
 Archive directory:  
 Sample directory:  
 FidFile: PROTON  
 Pulse Sequence: PROTON (s2pul)  
 Solvent: cdcl3  
 Data collected on: Feb 6 2020

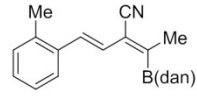

Temp. 25.0 C / 298.1 K  
 Operator: Liu

Relax. delay 10.000 sec  
 Pulse 45.0 degrees  
 Acq. time 2.045 sec  
 Width 8012.8 Hz  
 6 repetitions  
 OBSERVE HL, 499.8760066 MHz  
 DATA PROCESSING  
 FT size 32768  
 Total time 1 min 12 sec

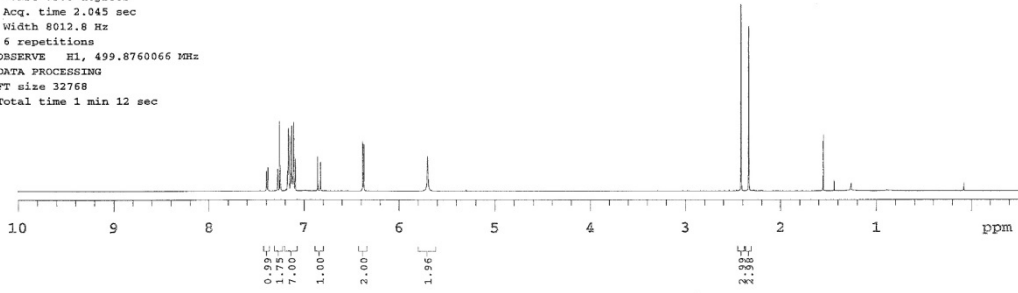

Sample Name:  
 Data Collected on: nmr19-vnmrs600  
 Archive directory:  
 Sample directory:  
 FidFile: CARBON  
 Pulse Sequence: CARBON (s2pul)  
 Solvent: cdcl3  
 Data collected on: Jan 3 2020

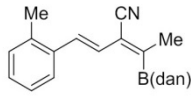

Temp. 25.0 C / 298.1 K  
 Operator: Liu

Relax. delay 1.000 sec  
 Pulse 45.0 degrees  
 Acq. time 0.865 sec  
 Width 37878.8 Hz  
 304 repetitions  
 OBSERVE c13, 150.7898132 MHz  
 DECOUPLE H1, 599.6836825 MHz  
 Power 45 dB  
 continuously on  
 WALTZ-16 modulated  
 DATA PROCESSING  
 Line broadening 0.5 Hz  
 FT size 65536  
 Total time 31 min

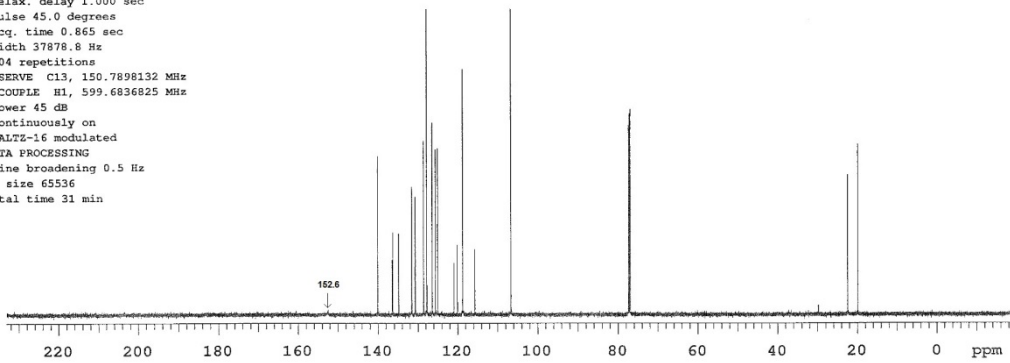

Sample Name:

Data Collected on:  
nmr11-inova500  
Archive directory:

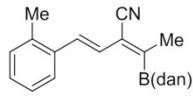

Sample directory:

FidFile: B11

Pulse Sequence: s2pul  
Solvent: cdcl3  
Data collected on: Jan 3 2020

Temp. 25.0 C / 298.1 K  
Operator: Liu

Relax. delay 0.010 sec  
Pulse 45.0 degrees  
Acq. time 0.064 sec  
Width 32064.1 Hz  
834 repetitions  
OBSERVE B11, 160.3467538 MHz  
DATA PROCESSING  
Line broadening 0.5 Hz  
FT size 4096  
Total time 1 min 23 sec

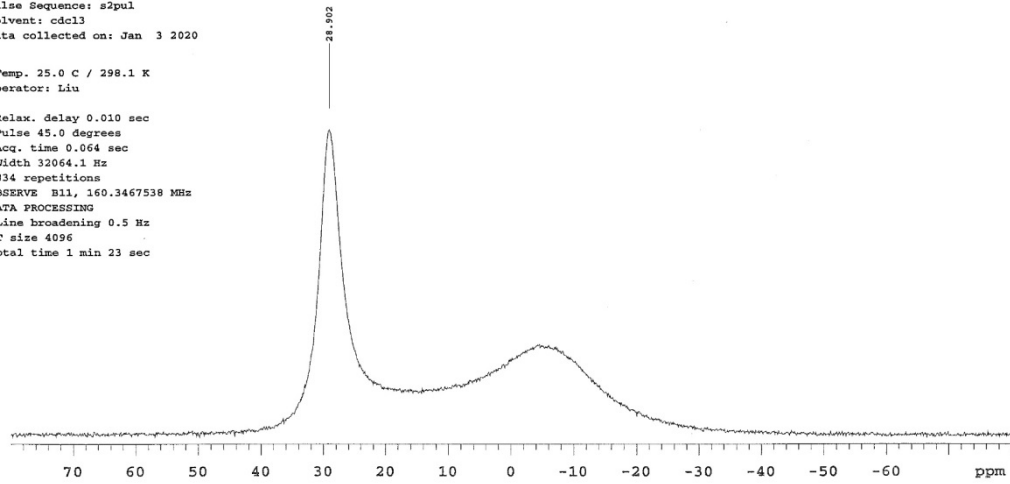

Sample Name:

Data Collected on:  
nmr18-vnmrs500  
Archive directory:

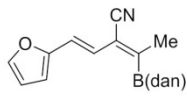

Sample directory:

FidFile: PROTON

Pulse Sequence: PROTON (s2pul)  
Solvent: cdcl3  
Data collected on: Jul 2 2019

Temp. 25.0 C / 298.1 K  
Operator: Liu

Relax. delay 10.000 sec  
Pulse 45.0 degrees  
Acq. time 2.045 sec  
Width 8012.8 Hz  
7 repetitions  
OBSERVE H1, 499.8762752 MHz  
DATA PROCESSING  
FT size 32768  
Total time 20 min

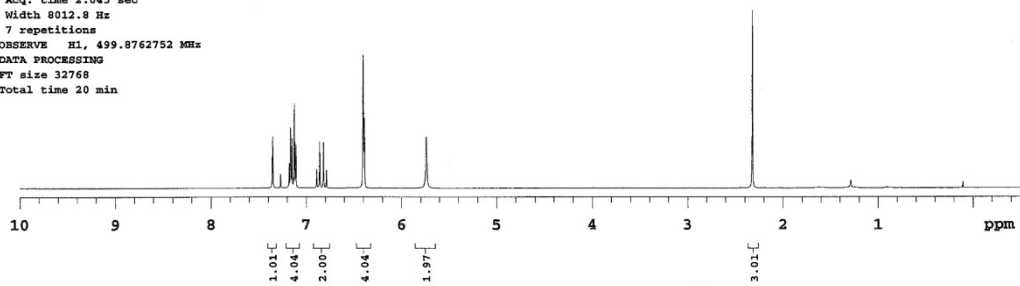

Sample Name:  
 Data Collected on:  
 Archive directory:  
 Sample directory:

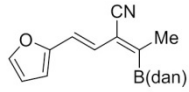

Fidfile: CARBON  
 Pulse Sequence: CARBON (s2pul)  
 Solvent: cdcl3  
 Data collected on: Jul 2 2019

Temp. 25.0 C / 298.1 K  
 Operator: Liu

Relax. delay 1.000 sec  
 Pulse 45.0 degrees  
 Acq. time 1.049 sec  
 Width 31250.0 Hz  
 306 repetitions  
 OBSERVE C13, 125.6939763 MHz  
 DECOUPLE H1, 499.8787746 MHz  
 Power 43 dB  
 continuously on  
 WALTZ-16 modulated  
 DATA PROCESSING  
 Line broadening 0.5 Hz  
 FT size 65536  
 Total time 34 min

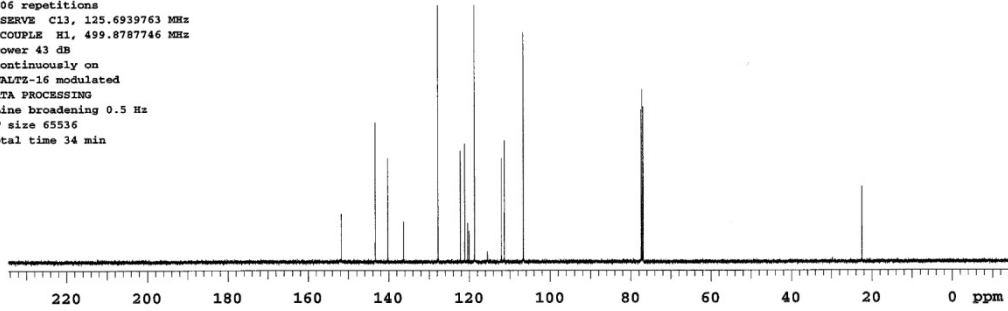

Sample Name:  
 Data Collected on:  
 Archive directory:  
 Sample directory:

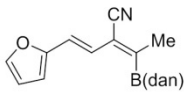

Fidfile: B11  
 Pulse Sequence: s2pul  
 Solvent: cdcl3  
 Data collected on: Jul 2 2019

Temp. 25.0 C / 298.1 K  
 Operator: Liu

Relax. delay 0.010 sec  
 Pulse 45.0 degrees  
 Acq. time 0.064 sec  
 Width 32064.1 Hz  
 1000 repetitions  
 OBSERVE B11, 160.3471139 MHz  
 DATA PROCESSING  
 Line broadening 0.5 Hz  
 FT size 4096  
 Total time 1 min 23 sec

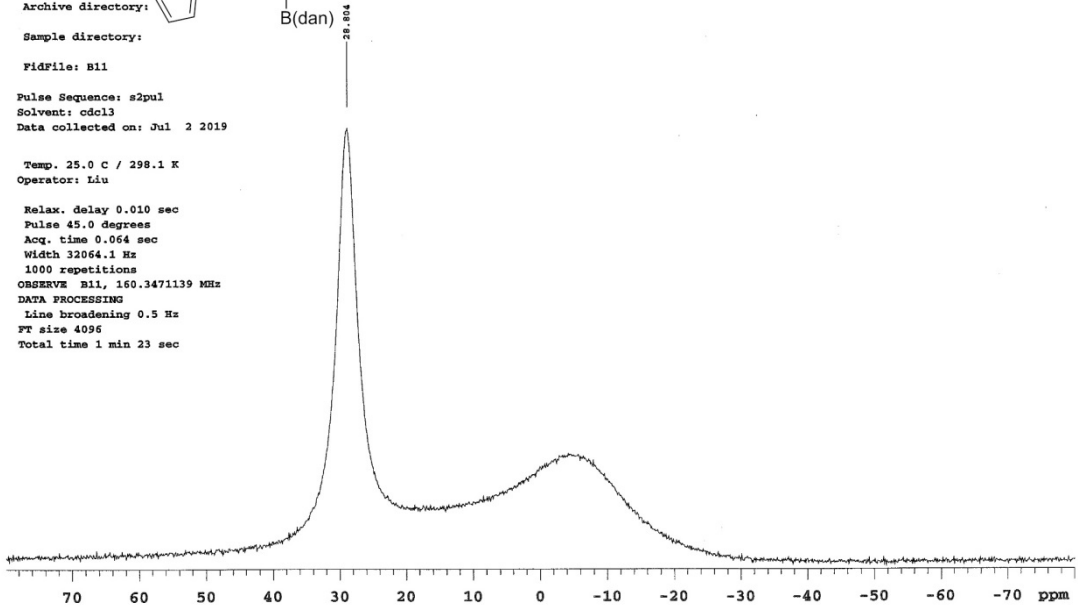

thio

Sample Name:

Data Collected on:  
nmr18-vmrs500

Archive directory:

Sample directory:

FidFile: PROTON

Pulse Sequence: PROTON (s2pul)  
Solvent: cdcl3  
Data collected on: Mar 1 2019

Temp. 25.0 C / 298.1 K  
Operator: Liu

Relax. delay 10.000 sec  
Pulse 45.0 degrees  
Acq. time 2.045 sec  
Width 8012.8 Hz  
10 repetitions  
OBSERVE H1, 499.8808020 MHz  
DATA PROCESSING  
FT size 32768  
Total time 20 min

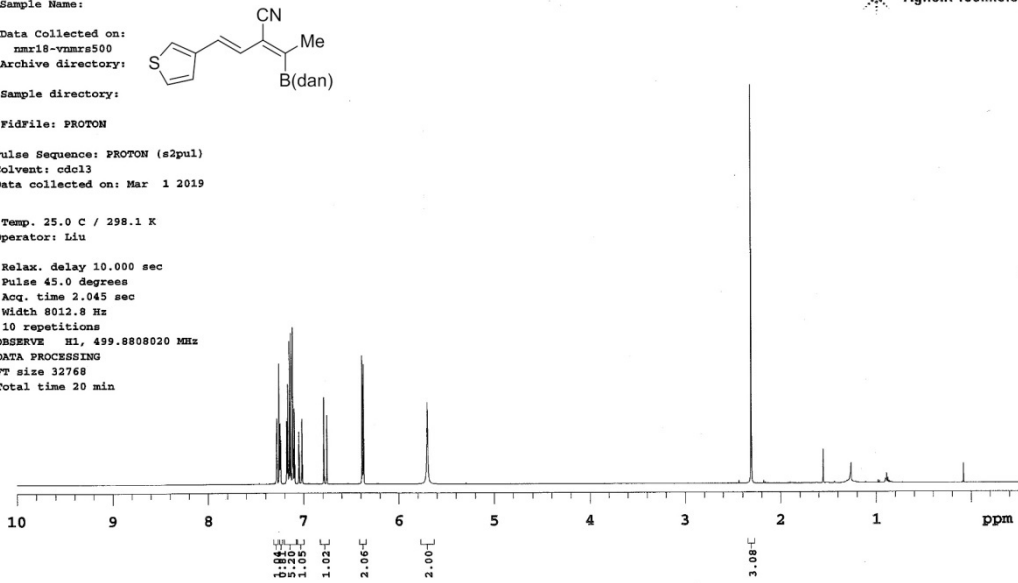

Agilent Technologies

thio

Sample Name:

Data Collected on:  
nmr18-vmrs500

Archive directory:

Sample directory:

FidFile: CARBON

Pulse Sequence: CARBON (s2pul)  
Solvent: cdcl3  
Data collected on: Mar 1 2019

Temp. 25.0 C / 298.1 K  
Operator: Liu

Relax. delay 1.000 sec  
Pulse 45.0 degrees  
Acq. time 1.049 sec  
Width 31250.0 Hz  
560 repetitions  
OBSERVE C13, 125.6951277 MHz  
DECOUPLE H1, 499.8833015 MHz  
Power 43 dB  
continuously on  
WALTZ-16 modulated  
DATA PROCESSING  
Line broadening 0.5 Hz  
FT size 65536  
Total time 56 hr, 54 min

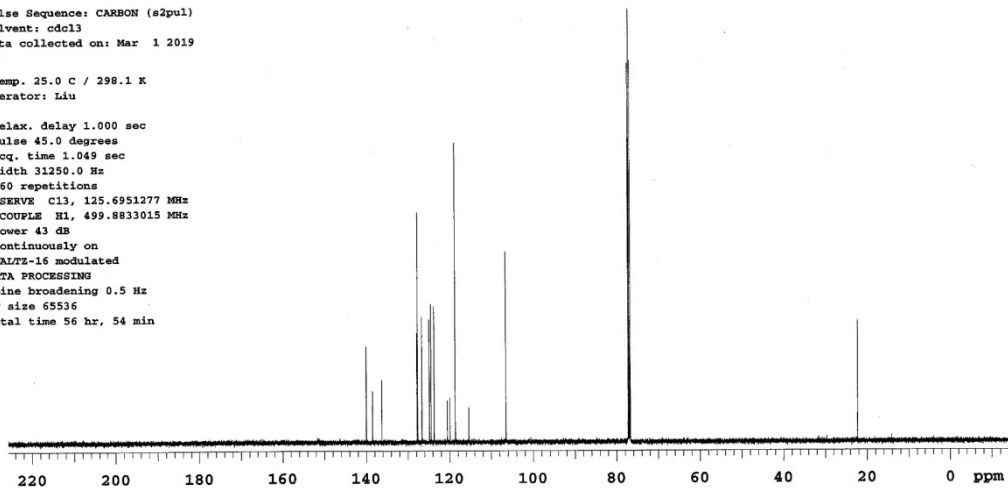

Agilent Technologies

thio

Sample Name:

Data Collected on:  
nmr11-inova500

Archive directory:

Sample directory:

FidFile: yz-3-190228-thio-B

Pulse Sequence: s2pul  
Solvent: cdcl3  
Data collected on: Feb 28 2019

Temp. 25.0 C / 298.1 K  
Operator: Liu

Relax. delay 0.010 sec  
Pulse 45.0 degrees  
Acq. time 0.064 sec  
Width 32064.1 Hz  
1230 repetitions  
OBSERVE H1, 160.3466912 MHz  
DATA PROCESSING  
Line broadening 0.5 Hz  
FT size 4096  
Total time 13 min

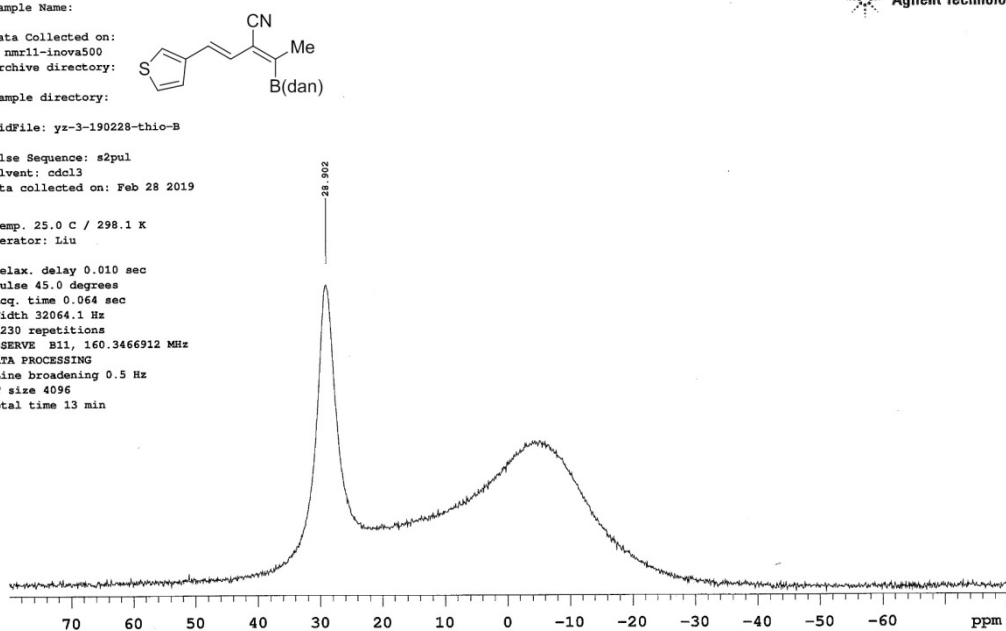

Sample Name:

Data Collected on:

nmr19-vnmrs600

Archive directory:

Sample directory:

FidFile: PROTON

Pulse Sequence: PROTON (s2pul)  
Solvent: cdcl3  
Data collected on: Jun 6 2019

Temp. 25.0 C / 298.1 K  
Operator: Liu

Relax. delay 10.000 sec  
Pulse 45.0 degrees  
Acq. time 1.704 sec  
Width 9615.4 Hz  
8 repetitions  
OBSERVE H1, 599.6809043 MHz  
DATA PROCESSING  
FT size 32768  
Total time 1 min 34 sec

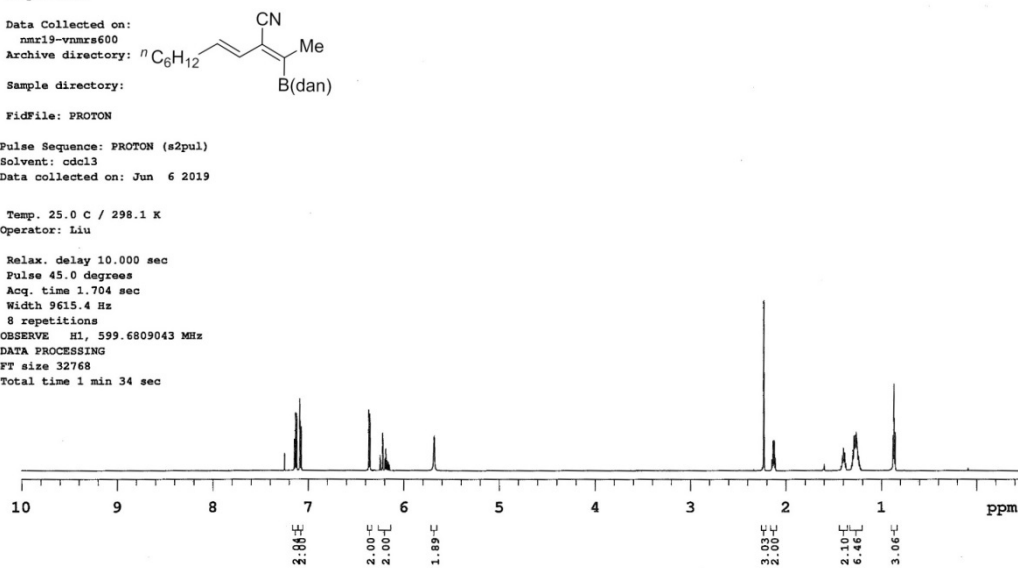

Sample Name:

Data Collected on:

nmr19-vmrs600

Archive directory:

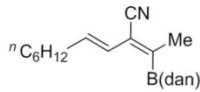

Sample directory:

FidFile: yz-3-190606-oct-C-1

Pulse Sequence: CARBON (s2pul)

Solvent: cdcl3

Data collected on: Jun 6 2019

Temp. 25.0 C / 298.1 K

Operator: Liu

Relax. delay 1.000 sec

Pulse 45.0 degrees

Acq. time 0.865 sec

Width 37878.8 Hz

312 repetitions

OBSERVE C13, 150.7898682 MHz

DECOUPLE H1, 599.6839027 MHz

Power 42 dB

continuously on

WALTZ-16 modulated

DATA PROCESSING

Line broadening 0.5 Hz

FT size 65536

Total time 31 min

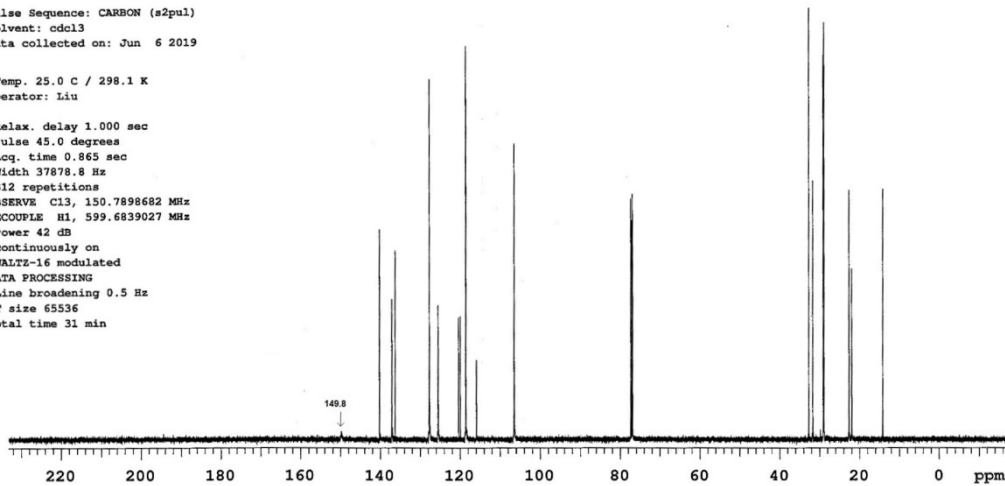

octyl

Sample Name:

Data Collected on:

nmr11-inova500

Archive directory:

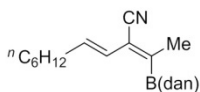

Sample directory:

FidFile: B11

Pulse Sequence: s2pul

Solvent: cdcl3

Data collected on: Jan 1 2019

Temp. 25.0 C / 298.1 K

Operator: Liu

Relax. delay 0.010 sec

Pulse 45.0 degrees

Acq. time 0.064 sec

Width 32064.1 Hz

1086 repetitions

OBSERVE B11, 160.3467538 MHz

DATA PROCESSING

Line broadening 0.5 Hz

FT size 4096

Total time 13 min

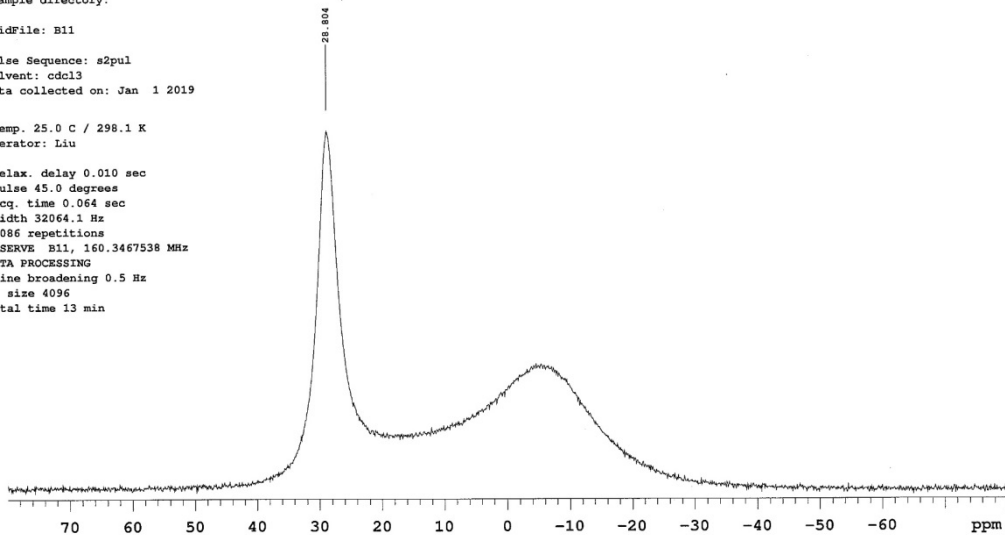

Agilent Technologies

oct-cl

Sample Name:

Data Collected on:  
nmr19-vmms600  
Archive directory:

Sample directory:

FidFile: PROTON

Pulse Sequence: PROTON (s2pul)  
Solvent: cdcl3  
Data collected on: Jan 15 2019

Temp. 25.0 C / 298.1 K  
Operator: Liu

Relax. delay 10.000 sec  
Pulse 45.0 degrees  
Acq. time 1.704 sec  
Width 9615.4 Hz  
10 repetitions  
OBSERVE H1, 599.6809043 MHz  
DATA PROCESSING  
FT size 32768  
Total time 19 min

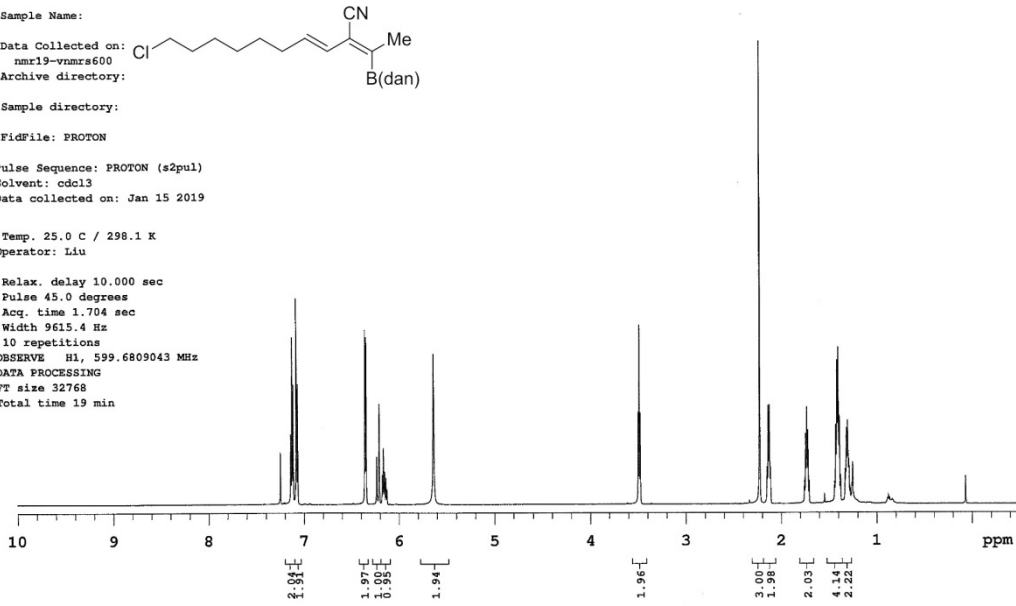

Sample Name:

Data Collected on:  
nmr19-vmms600  
Archive directory:

Sample directory:

FidFile: yz-3-190115-cloct-C-short

Pulse Sequence: CARBON (s2pul)  
Solvent: cdcl3  
Data collected on: Jan 15 2019

Temp. 25.0 C / 298.1 K  
Operator: Liu

Relax. delay 1.000 sec  
Pulse 45.0 degrees  
Acq. time 0.865 sec  
Width 37878.8 Hz  
200 repetitions  
OBSERVE C13, 150.7898615 MHz  
RECOUPLE H1, 599.6839027 MHz  
Power 45 dB  
continuously on  
WALTZ-16 modulated  
DATA PROCESSING  
Line broadening 0.5 Hz  
FT size 65536  
Total time 5 hr, 10 min

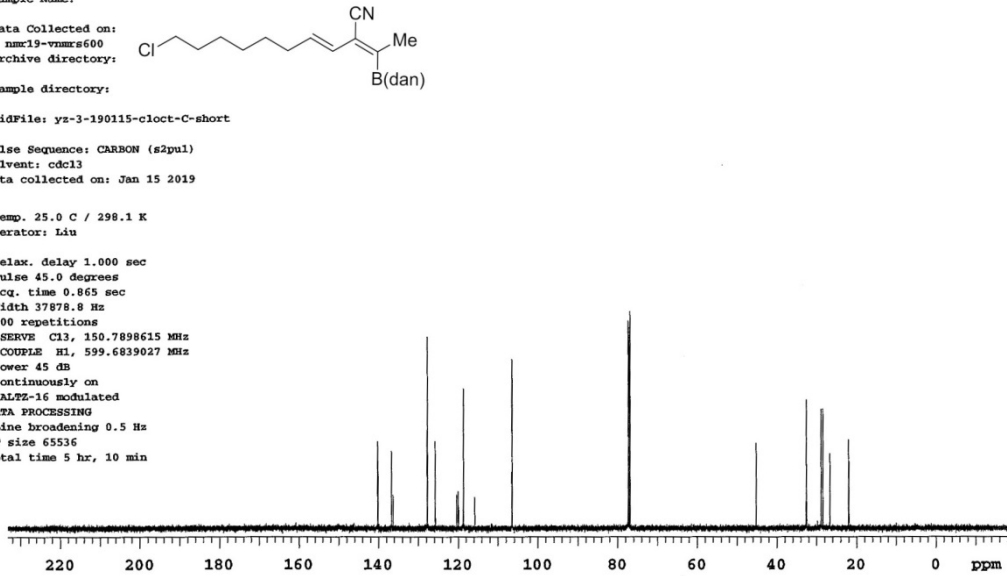



Sample Name:  
 Data Collected on:  
 nmr11-inova500  
 Archive directory:  
 Sample directory:  
 FidFile: B11  
 Pulse Sequence: s2pul  
 Solvent: cdcl3  
 Data collected on: Jan 25 2020  
 Temp. 25.0 C / 298.1 K  
 Operator: Liu

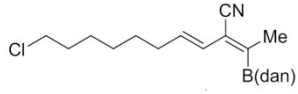

Relax. delay 0.010 sec  
 Pulse 45.0 degrees  
 Acq. time 0.064 sec  
 Width 32064.1 Hz  
 2280 repetitions  
 OBSERVE B11, 160.3467225 MHz  
 DATA PROCESSING  
 Line broadening 0.5 Hz  
 FT size 4096  
 Total time 13 min

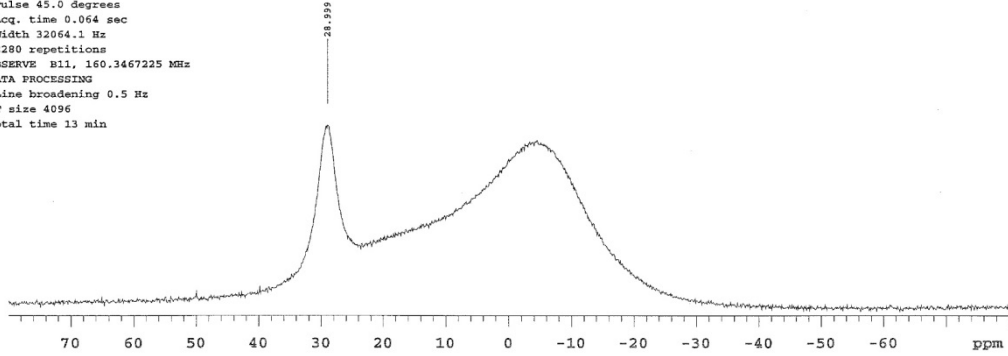

Sample Name:  
 Data Collected on:  
 nmr19-vnmr600  
 Archive directory:  
 Sample directory:  
 FidFile: yz-3-190331-chen-H  
 Pulse Sequence: PROTON (s2pul)  
 Solvent: cdcl3  
 Data collected on: Mar 31 2019  
 Temp. 25.0 C / 298.1 K  
 Operator: Liu

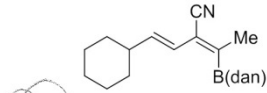

Relax. delay 10.000 sec  
 Pulse 45.0 degrees  
 Acq. time 1.704 sec  
 Width 9615.4 Hz  
 8 repetitions  
 OBSERVE H1, 599.6809043 MHz  
 DATA PROCESSING  
 FT size 32768  
 Total time 19 min

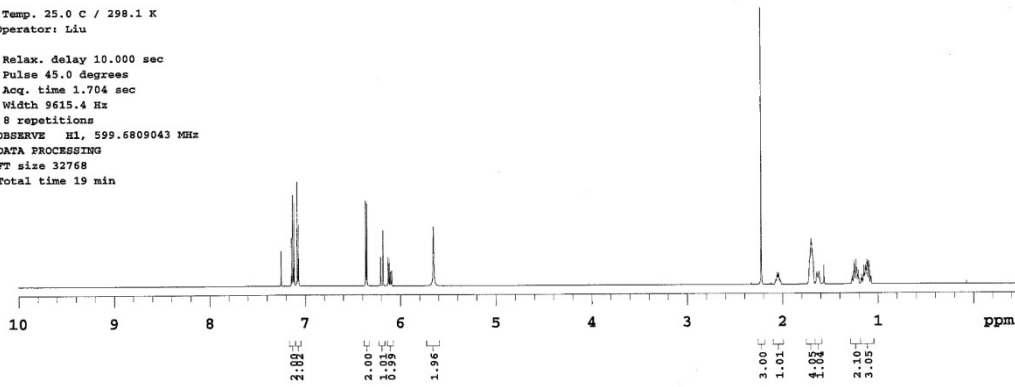

Sample Name:

Data Collected on:

nmr19-nmrs600

Archive directory:

Sample directory:

FidFile: yz-3-190331-chex-c

Pulse Sequence: CARBON (s2pul)

Solvent: cdcl3

Data collected on: Mar 31 2019

Temp. 25.0 C / 298.1 K

Operator: Liu

Relax. delay 1.000 sec

Pulse 45.0 degrees

Acq. time 0.865 sec

Width 37878.8 Hz

23176 repetitions

OBSERVE C13, 150.7898628 MHz

DECOUPLE H1, 599.6839027 MHz

Power 42 dB

continuously on

WALTZ-16 modulated

DATA PROCESSING

Line broadening 3.0 Hz

FT size 65536

Total time 12 hr, 57 min

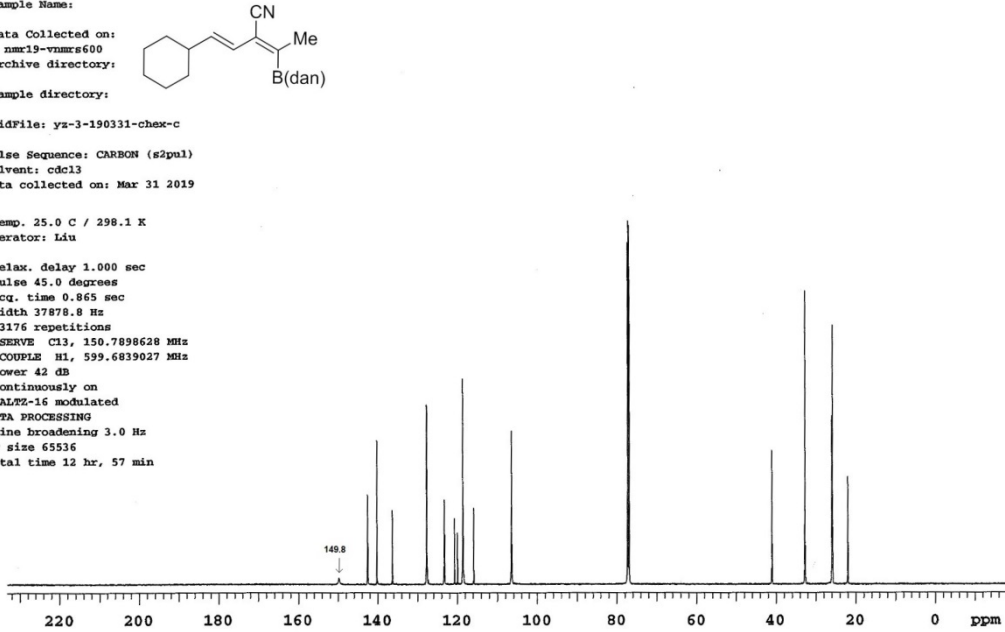

Sample Name:

Data Collected on:

nmr11-inova500

Archive directory:

Sample directory:

FidFile: B11

Pulse Sequence: s2pul

Solvent: cdcl3

Data collected on: Apr 1 2019

Temp. 25.0 C / 298.1 K

Operator: Liu

Relax. delay 0.010 sec

Pulse 45.0 degrees

Acq. time 0.064 sec

Width 32064.1 Hz

2008 repetitions

OBSERVE B11, 160.3466755 MHz

DATA PROCESSING

Line broadening 0.5 Hz

FT size 4096

Total time 13 min

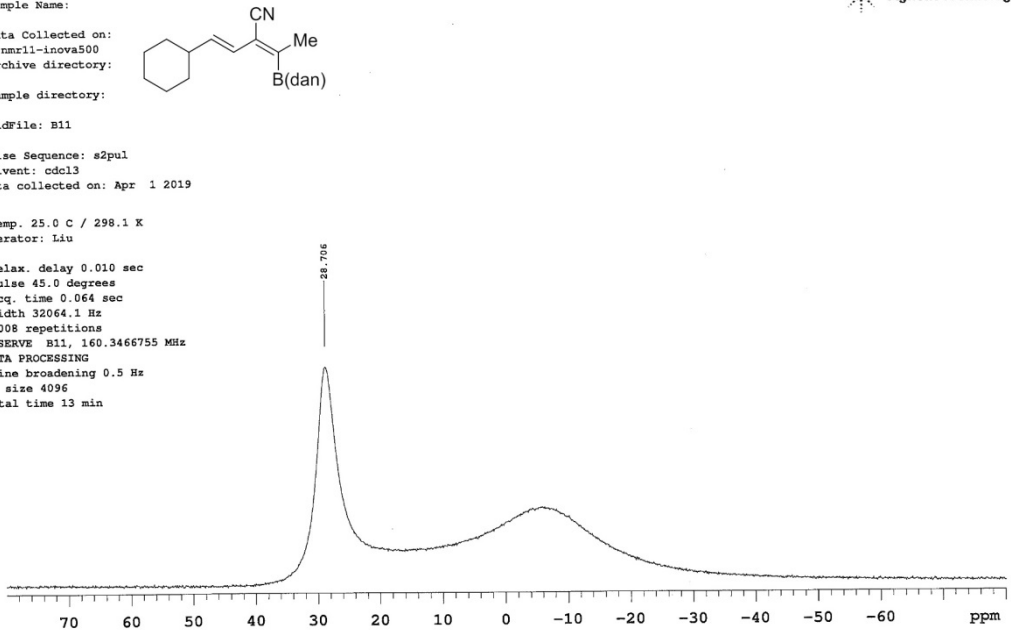

Agilent Technologies

Sample Name:  
 Data Collected on: nmr18-vnmrs500  
 Archive directory:  
 Sample directory:  
 FidFile: yz-3-190308-C20Bcat-H-1  
 Pulse Sequence: PROTON (s2pul)  
 Solvent: cdcl3  
 Data collected on: Mar 8 2019  
 Temp. 25.0 C / 298.1 K  
 Operator: Liu  
 Relax. delay 1.000 sec  
 Pulse 45.0 degrees  
 Acq. time 2.045 sec  
 Width 8012.8 Hz  
 14 repetitions  
 OBSERVE H1, 499.8808021 MHz  
 DATA PROCESSING  
 FT size 32768  
 Total time 2 min 2 sec

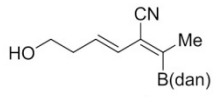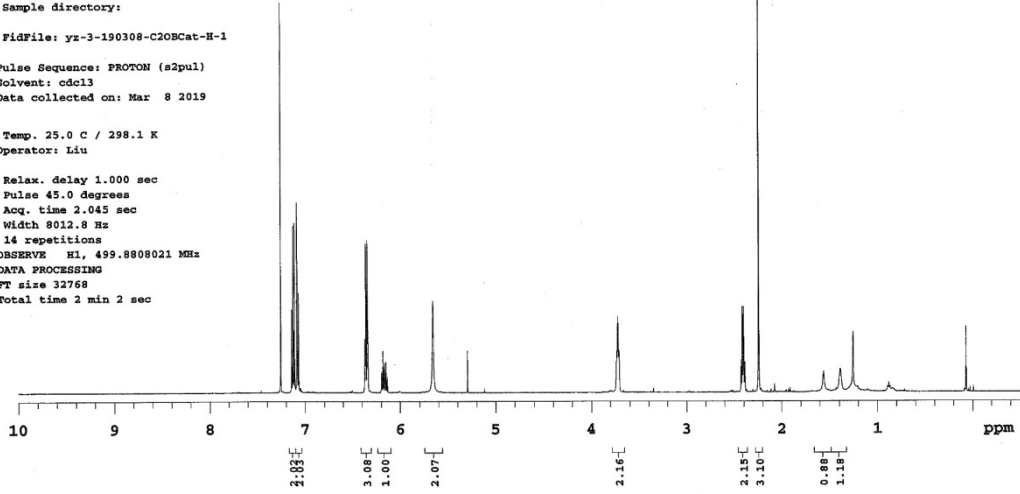

Sample Name:  
 Data Collected on: nmr19-vnmrs600  
 Archive directory:  
 Sample directory:  
 FidFile: yz-3-190307-C20Bcat-C-2  
 Pulse Sequence: CARBON (s2pul)  
 Solvent: cdcl3  
 Data collected on: Mar 8 2019  
 Temp. 25.0 C / 298.1 K  
 Operator: Liu  
 Relax. delay 1.000 sec  
 Pulse 45.0 degrees  
 Acq. time 0.865 sec  
 Width 37878.8 Hz  
 292 repetitions  
 OBSERVE C13, 150.7898628 MHz  
 DECOUPLE H1, 599.6839027 MHz  
 Power 42 dB  
 continuously on  
 WALTZ-16 modulated  
 DATA PROCESSING  
 Line broadening 0.5 Hz  
 FT size 65536  
 Total time 51 hr, 48 min

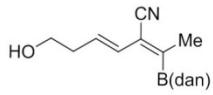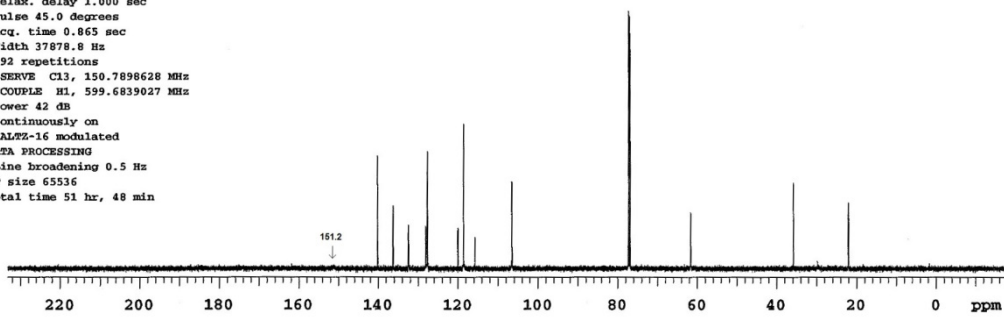

Sample Name:

Data Collected on:  
nmr11-inova500  
Archive directory:

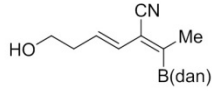

Sample directory:

FidFile: B11

Pulse Sequence: s2pul  
Solvent: cdcl3  
Data collected on: Mar 8 2019

Temp. 25.0 C / 298.1 K  
Operator: Liu

Relax. delay 0.010 sec  
Pulse 45.0 degrees  
Acq. time 0.064 sec  
Width 32064.1 Hz  
1022 repetitions  
OBSERVE B11, 160.3467382 MHz  
DATA PROCESSING  
Line broadening 0.5 Hz  
FT size 4096  
Total time 2 hr, 18 min

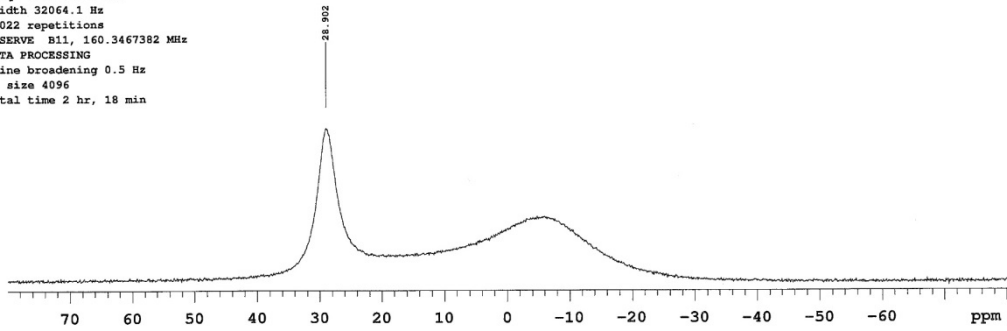

Sample Name:

Data Collected on:  
nmr19-vnmrs600  
Archive directory:

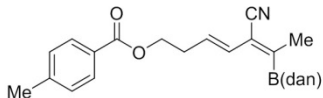

Sample directory:

FidFile: PROTON

Pulse Sequence: PROTON (s2pul)  
Solvent: cdcl3  
Data collected on: Jun 14 2019

Temp. 25.0 C / 298.1 K  
Operator: Liu

Relax. delay 10.000 sec  
Pulse 45.0 degrees  
Acq. time 1.704 sec  
Width 9615.4 Hz  
8 repetitions  
OBSERVE H1, 599.6809043 MHz  
DATA PROCESSING  
FT size 32768  
Total time 1 min 34 sec

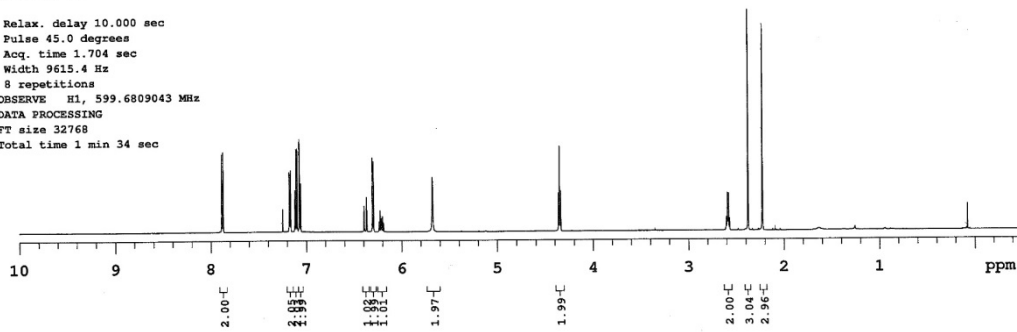

Sample Name:  
 Data Collected on: nmr19-vmmr600  
 Archive directory:  
 Sample directory:  
 FidFile: yz-3-190614-phco2-C  
 Pulse Sequence: CARBON (s2pul)  
 Solvent: cdcl3  
 Data collected on: Jun 14 2019

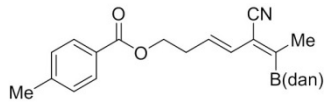

Temp. 25.0 C / 298.1 K  
 Operator: Liu  
 Relax. delay 1.000 sec  
 Pulse 45.0 degrees  
 Acq. time 0.865 sec  
 Width 37878.8 Hz  
 1960 repetitions  
 OBSERVE C13, 150.7898662 MHz  
 DECOUPLE H1, 599.6839027 MHz  
 Power 42 dB  
 continuously on  
 WALTZ-16 modulated  
 DATA PROCESSING  
 Line broadening 0.5 Hz  
 FT size 65536  
 Total time 5 hr, 10 min

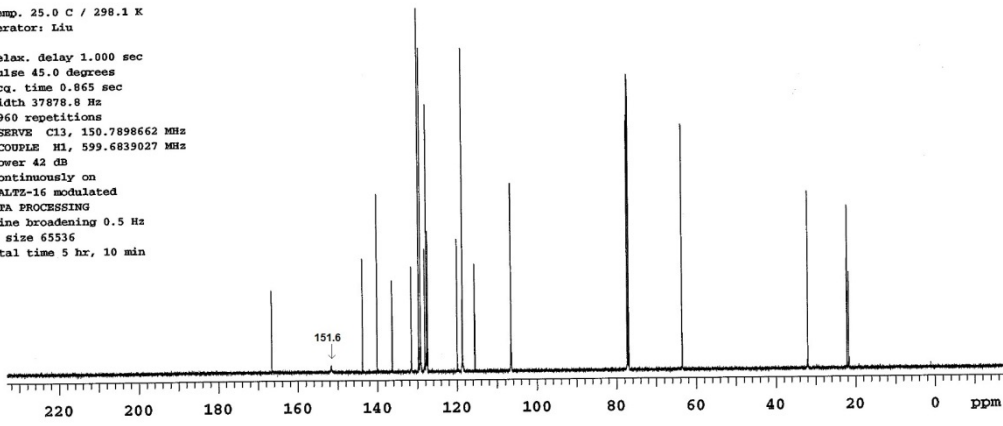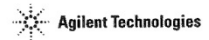

Sample Name:  
 Data Collected on: nmr11-inova500  
 Archive directory:  
 Sample directory:  
 FidFile: B11  
 Pulse Sequence: s2pul  
 Solvent: cdcl3  
 Data collected on: Jun 12 2019

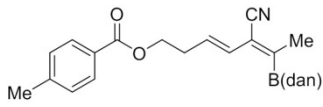

Temp. 25.0 C / 298.1 K  
 Operator: Liu  
 Relax. delay 0.010 sec  
 Pulse 45.0 degrees  
 Acq. time 0.064 sec  
 Width 32064.1 Hz  
 1244 repetitions  
 OBSERVE B11, 160.3470826 MHz  
 DATA PROCESSING  
 Line broadening 0.5 Hz  
 FT size 4096  
 Total time 13 min

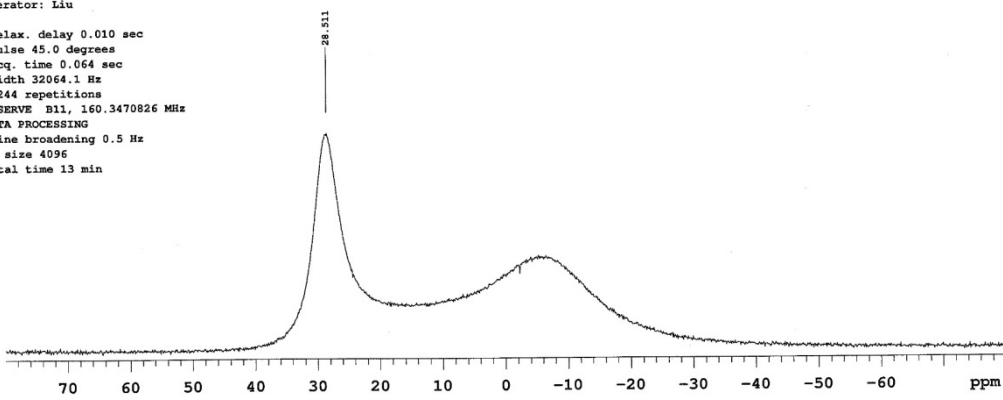

Sample Name:

Data Collected on:  
nmr18-vmms500  
Archive directory:

Sample directory:

FidFile: yz-3-190509-Et-H

Pulse Sequence: PROTON (s2pul)  
Solvent: cdcl3  
Data collected on: May 9 2019

Temp. 25.0 C / 298.1 K  
Operator: Liu

Relax. delay 10.000 sec  
Pulse 45.0 degrees  
Acq. time 2.045 sec  
Width 8012.8 Hz  
8 repetitions  
OBSERVE H1, 499.8762752 MHz  
DATA PROCESSING  
FT size 32768  
Total time 20 min

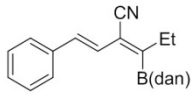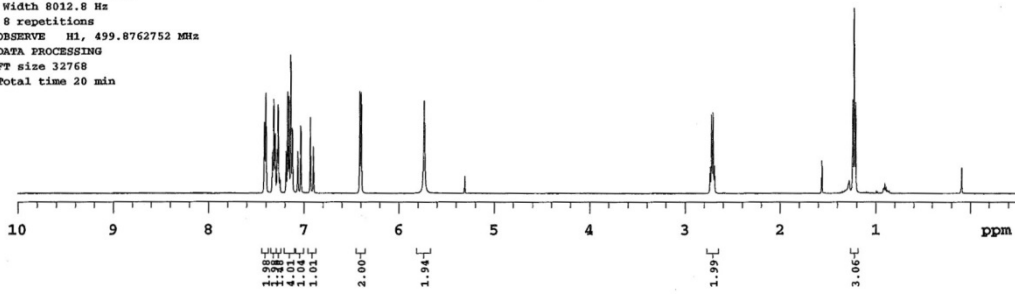

Sample Name:

Data Collected on:  
nmr18-vmms500  
Archive directory:

Sample directory:

FidFile: CARBON

Pulse Sequence: CARBON (s2pul)  
Solvent: cdcl3  
Data collected on: May 5 2019

Temp. 25.0 C / 298.1 K  
Operator: Liu

Relax. delay 1.000 sec  
Pulse 45.0 degrees  
Acq. time 1.049 sec  
Width 31250.0 Hz  
1102 repetitions  
OBSERVE C13, 125.6939894 MHz  
DECOUPLE H1, 499.8787746 MHz  
Power 43 dB  
continuously on  
WALTZ-16 modulated  
DATA PROCESSING  
Line broadening 0.5 Hz  
FT size 65536  
Total time 22 hr, 45 min

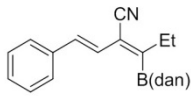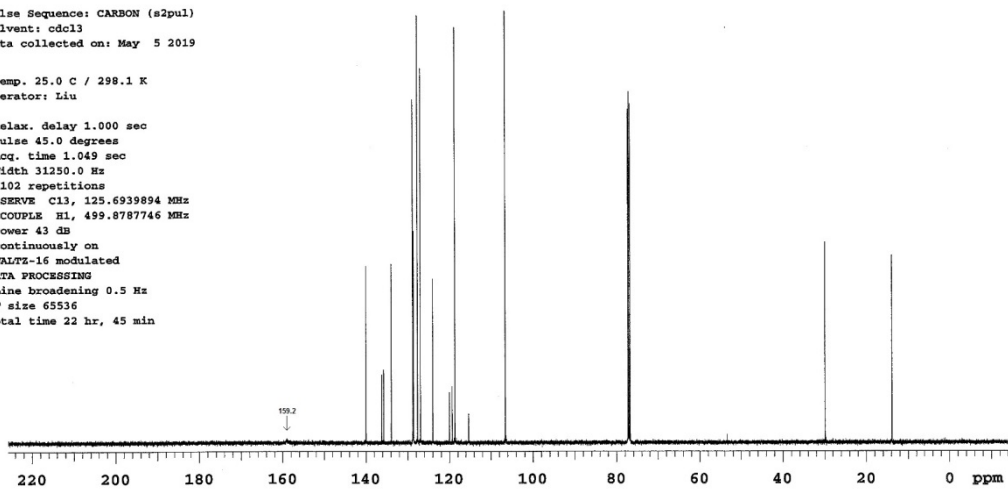

Agilent Technologies

Sample Name:  
 Data Collected on:  
 Archive directory:  
 Sample directory:

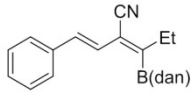

FidFile: B11  
 Pulse Sequence: s2pul  
 Solvent: cdcl3  
 Data collected on: May 5 2019

Temp. 25.0 C / 298.1 K  
 Operator: Liu

Relax. delay 0.010 sec  
 Pulse 45.0 degrees  
 Acq. time 0.064 sec  
 Width 32064.1 Hz  
 1350 repetitions  
 OBSERVE B11, 160.3467538 MHz  
 DATA PROCESSING  
 Line broadening 0.5 Hz  
 FT size 4096  
 Total time 2 hr, 18 min

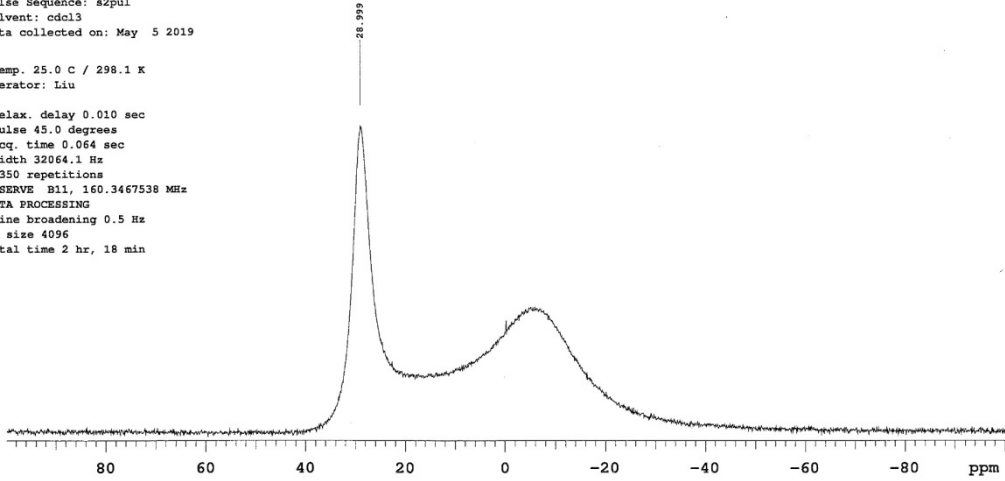

Sample Name:  
 Data Collected on:  
 Archive directory:  
 Sample directory:

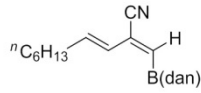

FidFile: PROTON  
 Pulse Sequence: PROTON (s2pul)  
 Solvent: cdcl3  
 Data collected on: Mar 17 2020

Temp. 25.0 C / 298.1 K  
 Operator: Liu

Relax. delay 10.000 sec  
 Pulse 45.0 degrees  
 Acq. time 2.045 sec  
 Width 8012.8 Hz  
 7 repetitions  
 OBSERVE H1, 499.8760066 MHz  
 DATA PROCESSING  
 FT size 32768  
 Total time 2 min 0 sec

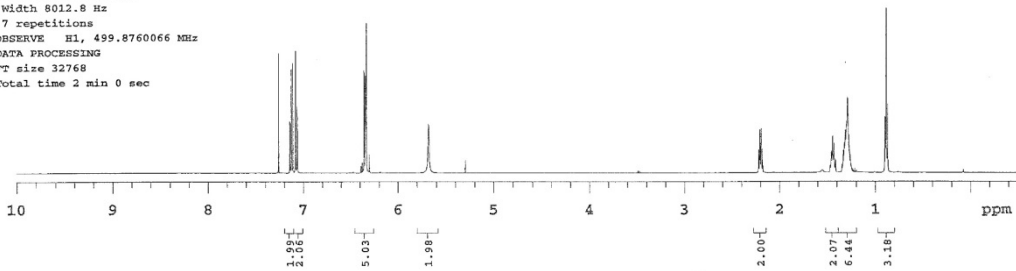

Sample Name:  
 Data Collected on: nmr18-vmars500  
 Archive directory: nC<sub>6</sub>H<sub>13</sub>  
 Sample directory:  
 Fidfile: CARBON  
 Pulse Sequence: CARBON (s2pul)  
 Solvent: cdcl3  
 Data collected on: Mar 17 2020

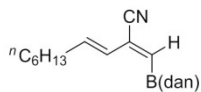

Temp. 25.0 C / 298.1 K  
 Operator: Liu  
 Relax. delay 1.000 sec  
 Pulse 45.0 degrees  
 Acq. time 1.049 sec  
 Width 31250.0 Hz  
 820 repetitions  
 OBSERVE C13, 125.6939027 MHz  
 DECOUPLE H1, 499.8785010 MHz  
 Power 44 dB  
 continuously on  
 WALTZ-16 modulated  
 DATA PROCESSING  
 Line broadening 0.5 Hz  
 FT size 65536  
 Total time 1 hr, 8 min

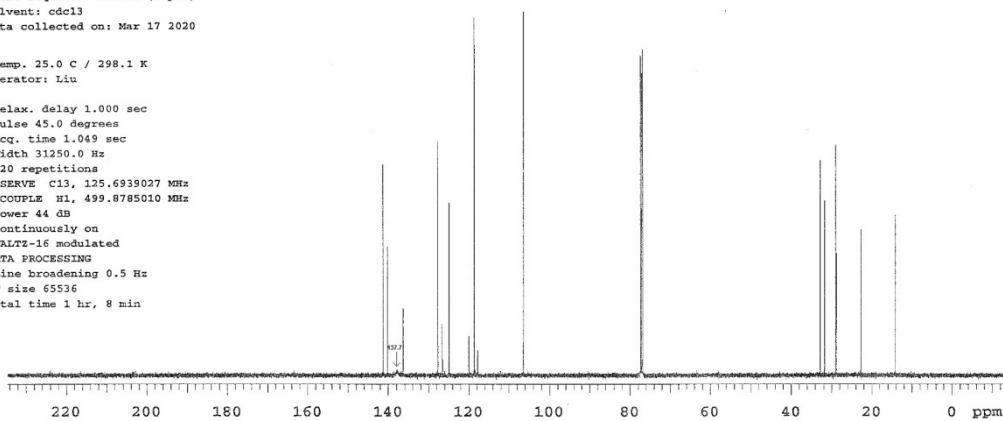

Sample Name:  
 Data Collected on: nmr11-inova500  
 Archive directory: nC<sub>6</sub>H<sub>13</sub>  
 Sample directory:  
 Fidfile: B11  
 Pulse Sequence: s2pul  
 Solvent: cdcl3  
 Data collected on: Mar 17 2020

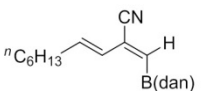

Temp. 25.0 C / 298.1 K  
 Operator: Liu  
 Relax. delay 0.010 sec  
 Pulse 45.0 degrees  
 Acq. time 0.064 sec  
 Width 32064.1 Hz  
 855 repetitions  
 OBSERVE B11, 160.3467068 MHz  
 DATA PROCESSING  
 Line broadening 0.5 Hz  
 FT size 4096  
 Total time 1 min 23 sec

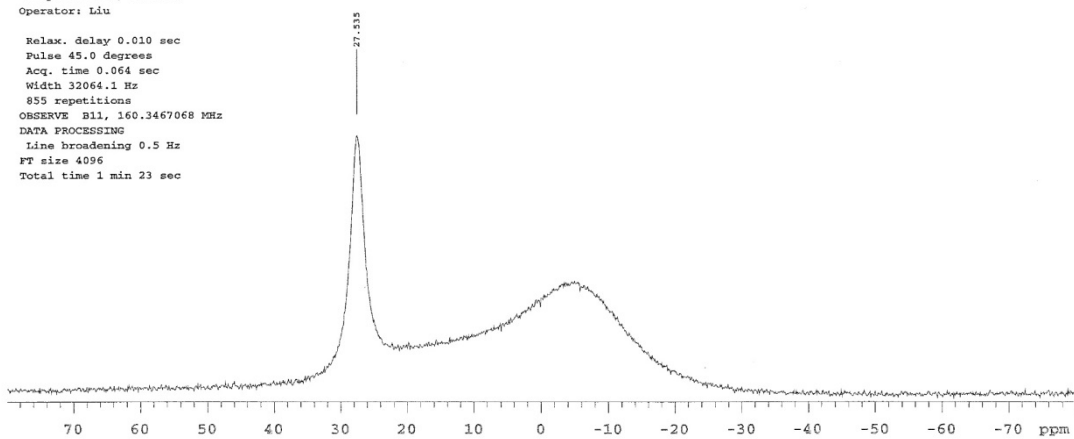



Sample Name:  
 Data Collected on: nmr18-vmrs500  
 Archive directory:  
 Sample directory:  
 FidFile: PROTON  
 Pulse Sequence: PROTON (s2pul)  
 Solvent: cdcl3  
 Data collected on: Feb 3 2020

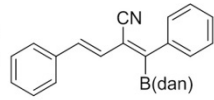

Temp. 25.0 C / 298.1 K  
 Operator: Liu

Relax. delay 10.000 sec  
 Pulse 45.0 degrees  
 Acq. time 2.045 sec  
 Width 8012.8 Hz  
 10 repetitions  
 OBSERVE H1, 499.8760042 MHz  
 DATA PROCESSING  
 FT size 32768  
 Total time 2 min 0 sec

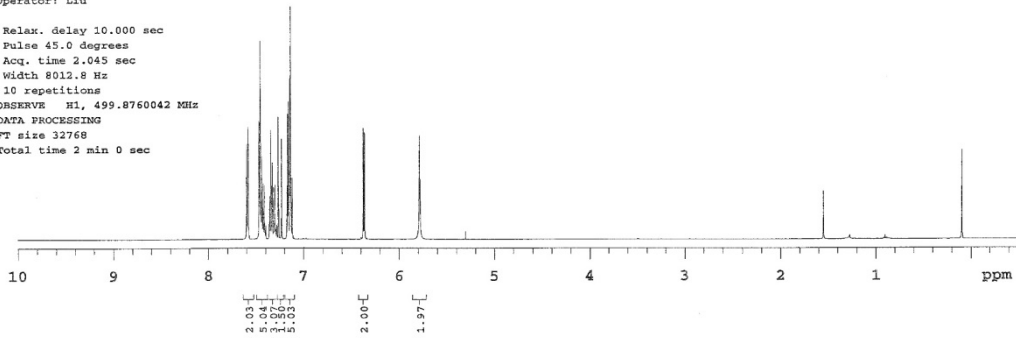

Sample Name:  
 Data Collected on: nmr19-vmrs600  
 Archive directory:  
 Sample directory:  
 FidFile: CARBON  
 Pulse Sequence: CARBON (s2pul)  
 Solvent: cdcl3  
 Data collected on: May 22 2019

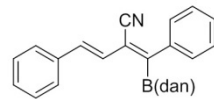

Temp. 25.0 C / 298.1 K  
 Operator: Liu

Relax. delay 1.000 sec  
 Pulse 45.0 degrees  
 Acq. time 0.865 sec  
 Width 37878.8 Hz  
 824 repetitions  
 OBSERVE C13, 150.7898628 MHz  
 DECOUPLE H1, 599.6839027 MHz  
 Power 42 dB  
 continuously on  
 WALTZ-16 modulated  
 DATA PROCESSING  
 Line broadening 0.5 Hz  
 FT size 65536  
 Total time 2 hr, 4 min

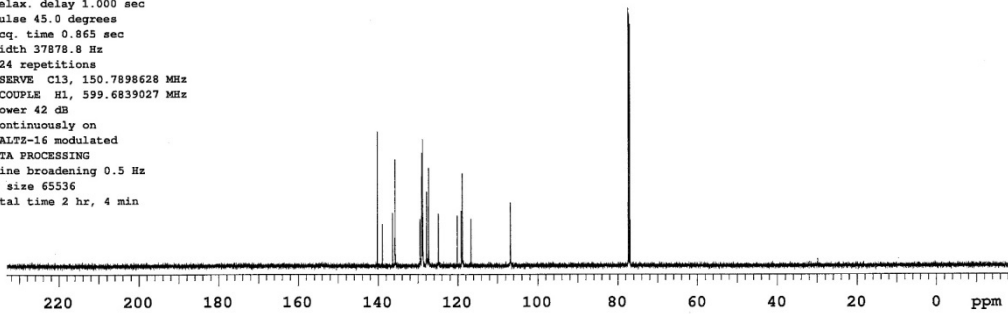

Sample Name:

Data Collected on:  
nmr11-inova500  
Archive directory:

Sample directory:

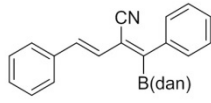

FidFile: B11

Pulse Sequence: s2pul  
Solvent: cdcl3  
Data collected on: May 22 2019

Temp. 25.0 C / 298.1 K  
Operator: Liu

Relax. delay 0.010 sec  
Pulse 45.0 degrees  
Acq. time 0.064 sec  
Width 32064.1 Hz  
1000 repetitions  
OBSERVE B11, 160.3467538 MHz  
DATA PROCESSING  
Line broadening 0.5 Hz  
FT size 4096  
Total time 1 min 23 sec

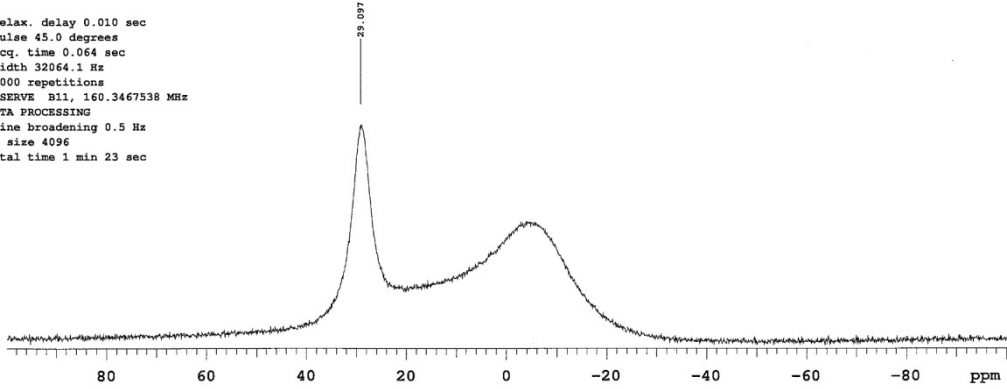

Sample Name:

Data Collected on:  
nmr18-vnmrs500  
Archive directory:

Sample directory:

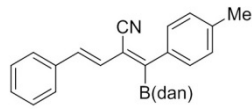

FidFile: PROTON

Pulse Sequence: PROTON (s2pul)  
Solvent: cdcl3  
Data collected on: Feb 23 2020

Temp. 25.0 C / 298.1 K  
Operator: Liu

Relax. delay 10.000 sec  
Pulse 45.0 degrees  
Acq. time 2.045 sec  
Width 8012.8 Hz  
6 repetitions  
OBSERVE H1, 499.8760059 MHz  
DATA PROCESSING  
FT size 32768  
Total time 1 min 12 sec

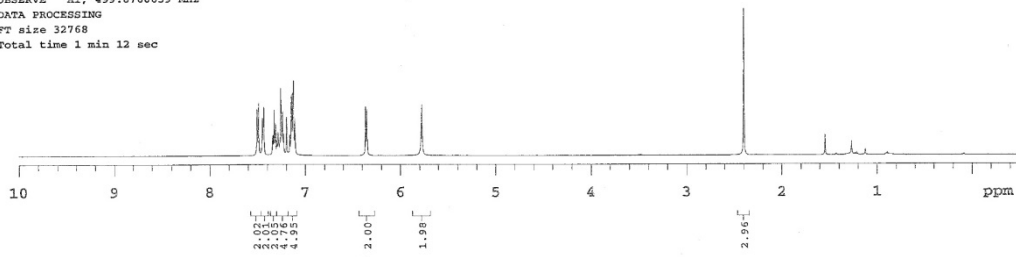

Sample Name:  
Data Collected on:  
nmr18-vmrs500  
Archive directory:  
Sample directory:

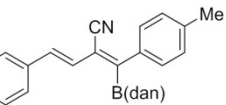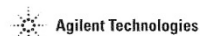

Fidfile: CARBON  
Pulse Sequence: CARBON (s2pul)  
Solvent: cdcl3  
Data collected on: May 26 2019

Temp. 25.0 C / 298.1 K  
Operator: Liu

Relax. delay 1.000 sec  
Pulse 45.0 degrees  
Acq. time 1.049 sec  
Width 31250.0 Hz  
800 repetitions  
OBSERVE C13, 125.6939658 MHz  
DECOUPLE H1, 499.8787746 MHz  
Power 43 dB  
continuously on  
WALTZ-16 modulated  
DATA PROCESSING  
Line broadening 0.5 Hz  
FT size 65536  
Total time 1 hr, 42 min

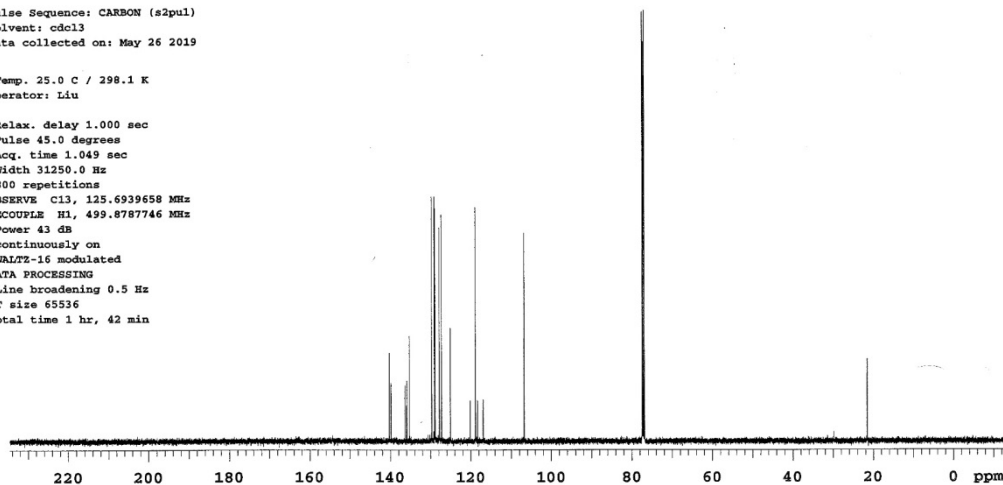

STANDARD PROTON PARAMETERS

Sample Name:  
Data Collected on:  
nmr11-inova500  
Archive directory:  
Sample directory:

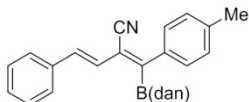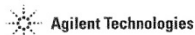

Fidfile: B11

Pulse Sequence: s2pul  
Solvent: cdcl3  
Data collected on: May 26 2019

Temp. 25.0 C / 298.1 K  
Operator: Liu

Relax. delay 0.010 sec  
Pulse 45.0 degrees  
Acq. time 0.064 sec  
Width 32064.1 Hz  
1000 repetitions  
OBSERVE H1, 160.3467695 MHz  
DATA PROCESSING  
Line broadening 0.5 Hz  
FT size 4096  
Total time 1 min 23 sec

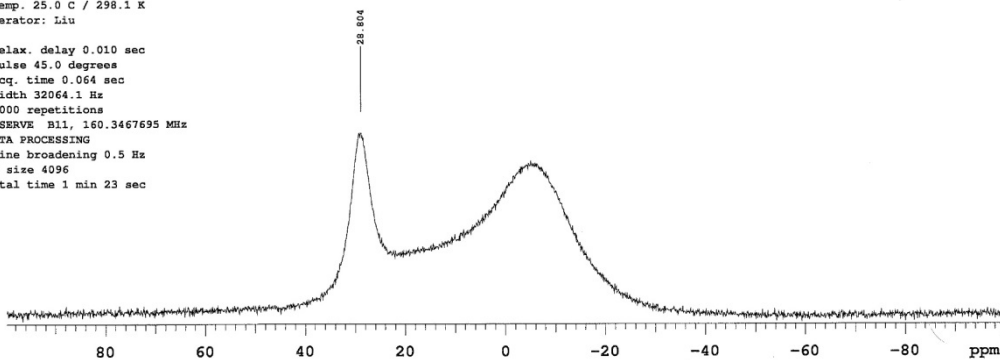

Sample Name:

Data Collected on:  
nmr19-vmrs600  
Archive directory:

Sample directory:

FidFile: PROTON

Pulse Sequence: PROTON (s2pul)  
Solvent: cdcl3  
Data collected on: May 24 2019

Temp. 25.0 C / 298.1 K  
Operator: Liu

Relax. delay 10.000 sec  
Pulse 45.0 degrees  
Acq. time 1.704 sec  
Width 9615.4 Hz  
8 repetitions  
OBSERVE H1, 599.6809043 MHz  
DATA PROCESSING  
FT size 32768  
Total time 7 min 48 sec

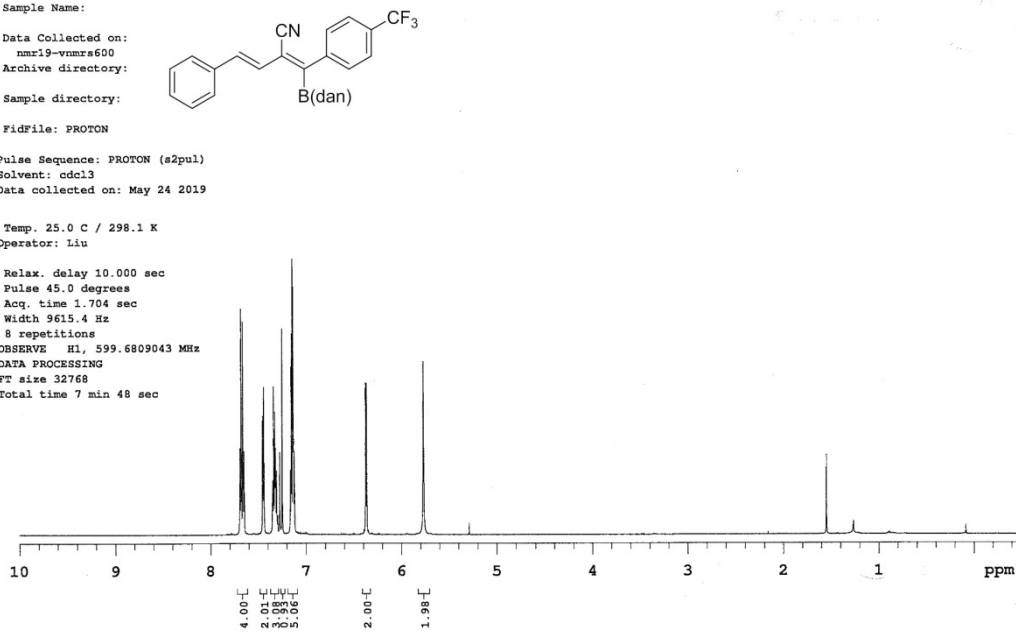

Sample Name:

Data Collected on:  
nmr19-vmrs600  
Archive directory:

Sample directory:

FidFile: CARBON

Pulse Sequence: CARBON (s2pul)  
Solvent: cdcl3  
Data collected on: May 24 2019

Temp. 25.0 C / 298.1 K  
Operator: Liu

Relax. delay 1.000 sec  
Pulse 45.0 degrees  
Acq. time 0.865 sec  
Width 37878.8 Hz  
1360 repetitions  
OBSERVE C13, 150.7898628 MHz  
DECOUPLE H1, 599.6839027 MHz  
Power 42 dB  
continuously on  
WALTZ-16 modulated  
DATA PROCESSING  
Line broadening 0.5 Hz  
FT size 65536  
Total time 7 hr, 46 min

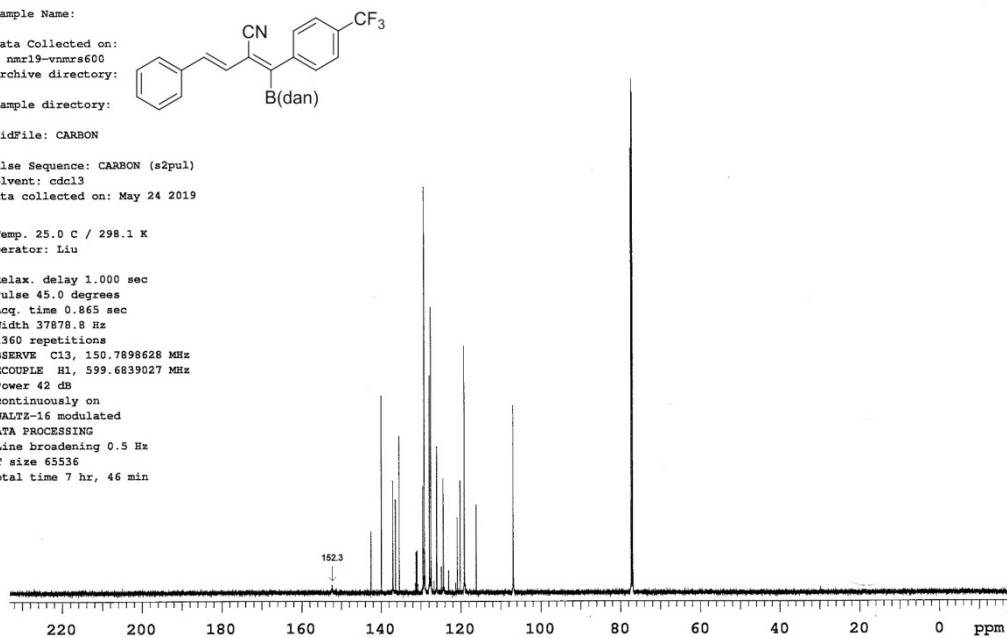

Sample Name:

Data Collected on:  
nmr11-inova500  
Archive directory:

Sample directory:

FidFile: B11

Pulse Sequence: s2pul  
Solvent: cdcl3  
Data collected on: May 24 2019

Temp. 25.0 C / 298.1 K  
Operator: Liu

Relax. delay 0.010 sec  
Pulse 45.0 degrees  
Acq. time 0.064 sec  
Width 32064.1 Hz  
1000 repetitions  
OBSERVE B11, 160.3467538 MHz  
DATA PROCESSING  
Line broadening 0.5 Hz  
FT size 4096  
Total time 1 min 23 sec

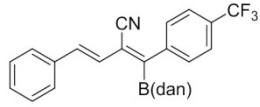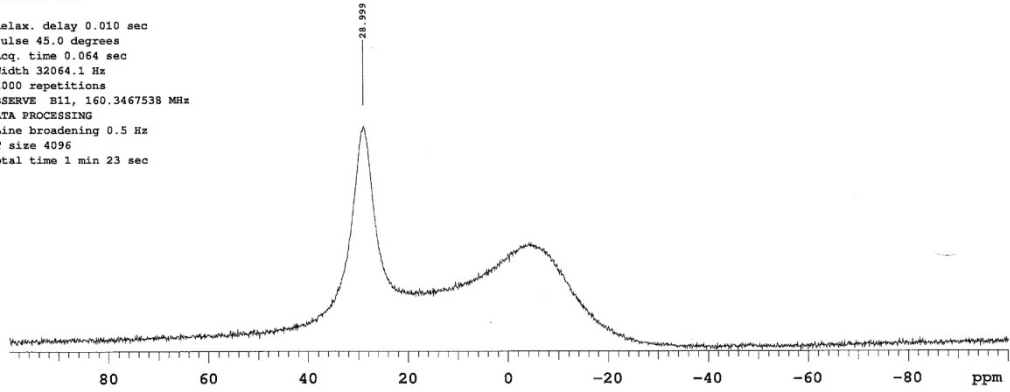

STANDARD FLUORINE PARAMETERS

Sample Name:

Data Collected on:  
nmr19-vnmrs600  
Archive directory:

Sample directory:

FidFile: FLUORINE

Pulse Sequence: FLUORINE (s2pul)  
Solvent: cdcl3  
Data collected on: May 24 2019

Temp. 25.0 C / 298.1 K  
Operator: Liu

Relax. delay 1.000 sec  
Pulse 30.0 degrees  
Acq. time 0.996 sec  
Width 131.6 kHz  
10 repetitions  
OBSERVE F19, 564.2638160 MHz  
DATA PROCESSING  
FT size 262144  
Total time 0 min 20 sec

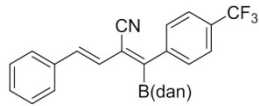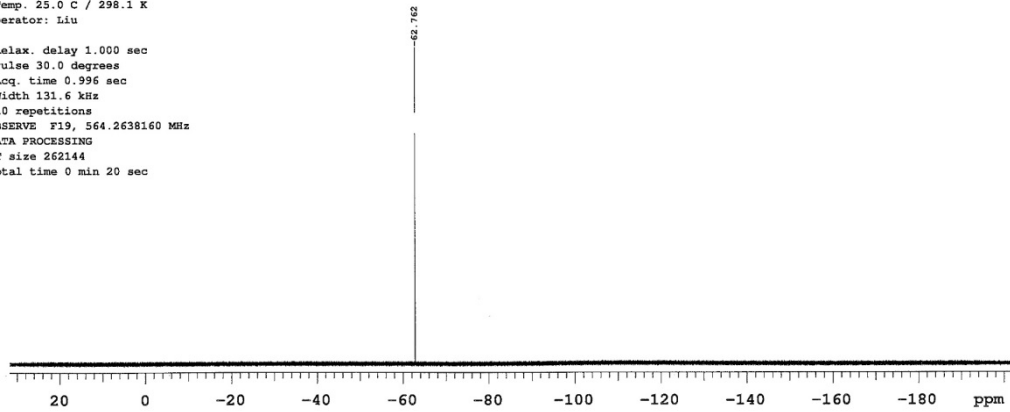

Sample Name:  
Data Collected on:  
nmr19-vnmrs600  
Archive directory:  
Sample directory:  
Fidfile: PROTON

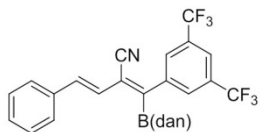

Pulse Sequence: PROTON (s2pul)  
Solvent: cdcl3  
Data collected on: Jun 2 2019

Temp. 25.0 C / 298.1 K  
Operator: Liu

Relax. delay 10.000 sec  
Pulse 45.0 degrees  
Acq. time 1.704 sec  
Width 9615.4 Hz  
8 repetitions  
OBSERVE H1, 599.6809043 MHz  
DATA PROCESSING  
F1 size 32768  
Total time 1 min 34 sec

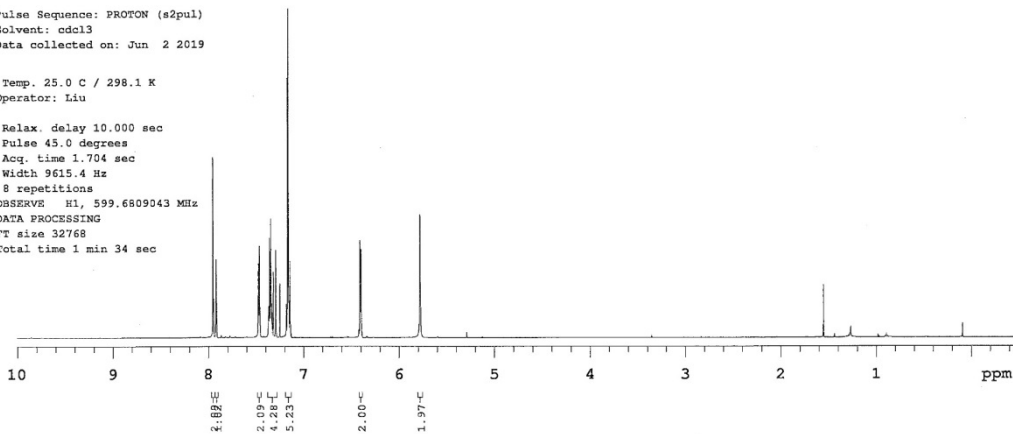

Sample Name:  
Data Collected on:  
nmr19-vnmrs600  
Archive directory:  
Sample directory:  
Fidfile: yz-3-190602-ph-ene-ph-cf3-2-C

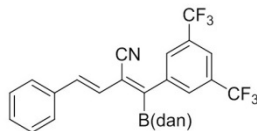

Pulse Sequence: CARBON (s2pul)  
Solvent: cdcl3  
Data collected on: Jun 2 2019

Temp. 25.0 C / 298.1 K  
Operator: Liu

Relax. delay 1.000 sec  
Pulse 45.0 degrees  
Acq. time 0.865 sec  
Width 37878.8 Hz  
2040 repetitions  
OBSERVE C13, 150.7898628 MHz  
DECOUPLE H1, 599.6839027 MHz  
Power 42 dB  
continuously on  
WALTZ-16 modulated  
DATA PROCESSING  
Line broadening 0.5 Hz  
F1 size 65536  
Total time 5 hr, 10 min

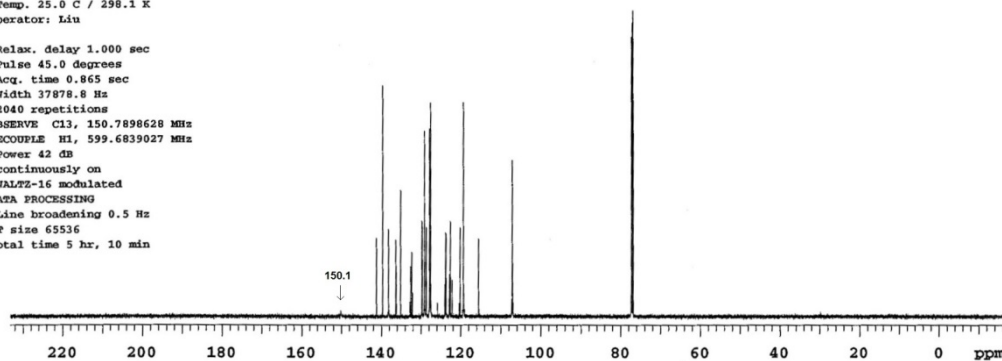

Sample Name:  
 Data Collected on:  
 Archive directory:  
 Sample directory:  
 FidFile: B11

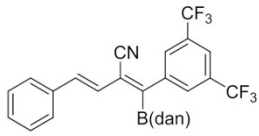

Pulse Sequence: s2pul  
 Solvent: cdcl3  
 Data collected on: Jun 2 2019

Temp. 25.0 C / 298.1 K  
 Operator: Liu

Relax. delay 0.010 sec  
 Pulse 45.0 degrees  
 Acq. time 0.064 sec  
 Width 32064.1 Hz  
 1000 repetitions  
 OBSERVE B11, 160.3464720 MHz  
 DATA PROCESSING  
 Line broadening 0.5 Hz  
 FT size 4096  
 Total time 1 min 23 sec

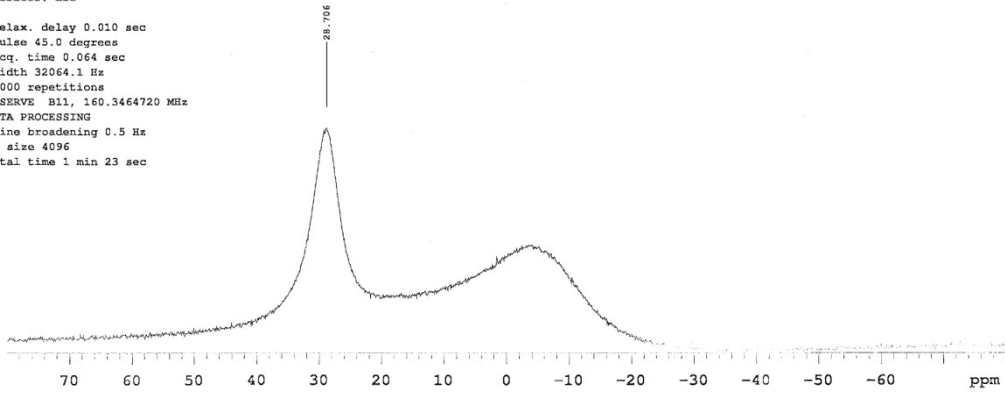

STANDARD FLUORINE PARAMETERS

Sample Name:  
 Data Collected on:  
 Archive directory:  
 Sample directory:  
 FidFile: FLUORINE

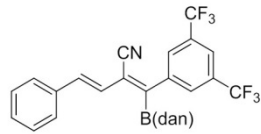

Pulse Sequence: FLUORINE (s2pul)  
 Solvent: cdcl3  
 Data collected on: Jun 2 2019

Temp. 25.0 C / 298.1 K  
 Operator: Liu

Relax. delay 1.000 sec  
 Pulse 30.0 degrees  
 Acq. time 0.996 sec  
 Width 131.6 kHz  
 20 repetitions  
 OBSERVE F19, 564.2638160 MHz  
 DATA PROCESSING  
 FT size 262144  
 Total time 0 min 40 sec

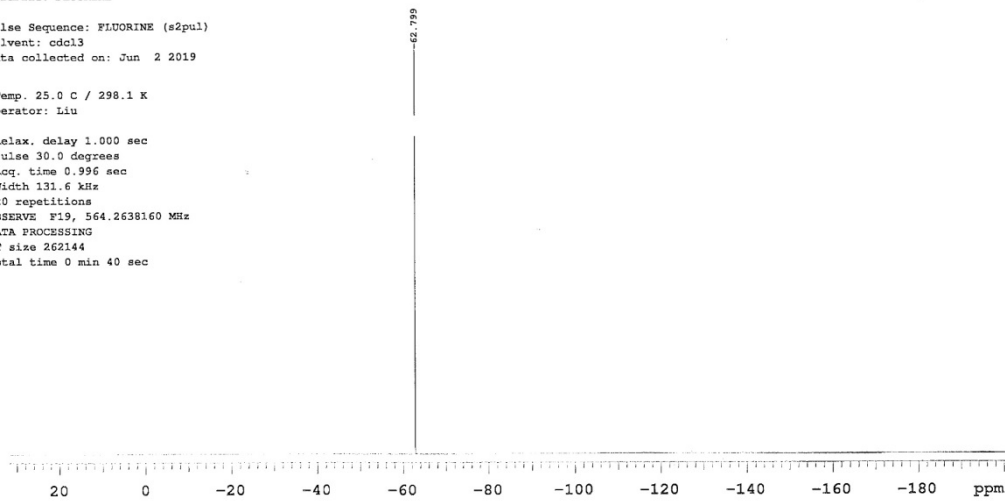

Sample Name:  
 Data Collected on:  
 Archive directory:  
 Sample directory:  
 FidFile: PROTON  
 Pulse Sequence: PROTON (s2pul)  
 Solvent: cdcl3  
 Data collected on: Nov 5 2019

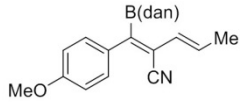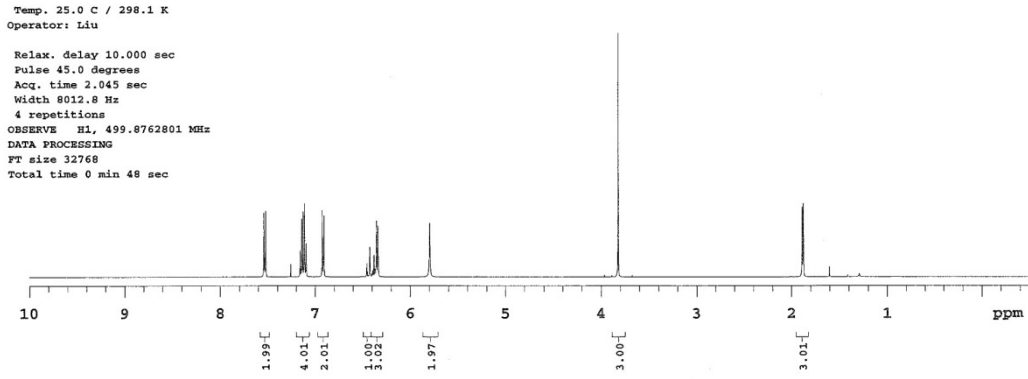

Sample Name:  
 Data Collected on:  
 Archive directory:  
 Sample directory:  
 FidFile: CARBON  
 Pulse Sequence: CARBON (s2pul)  
 Solvent: cdcl3  
 Data collected on: Nov 5 2019  
 Temp. 25.0 C / 298.1 K  
 Operator: Liu  
 Relax. delay 1.000 sec  
 Pulse 45.0 degrees  
 Acq. time 1.049 sec  
 Width 31250.0 Hz  
 440 repetitions  
 OBSERVE C13, 125.6939811 MHz  
 DECOUPLE HL, 499.8787746 MHz  
 Power 45 dB  
 continuously on  
 WALTZ-16 modulated  
 DATA PROCESSING  
 Line broadening 0.5 Hz  
 FT size 65536  
 Total time 34 min

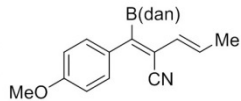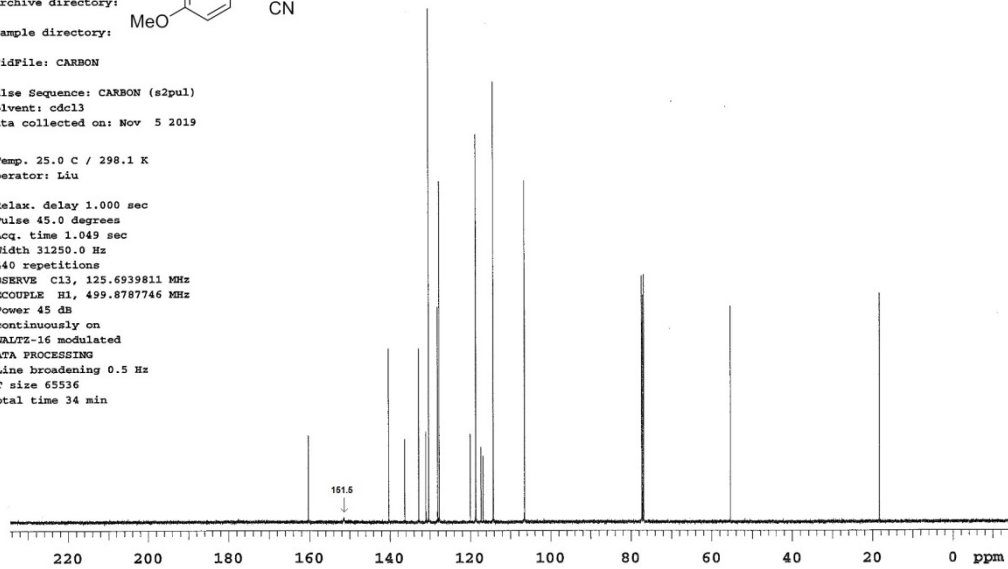



Sample Name:  
 Data Collected on: nmr11-inova500  
 Archive directory:  
 Sample directory: MeO

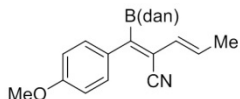

FidFile: B11  
 Pulse Sequence: s2pul  
 Solvent: cdcl3  
 Data collected on: Sep 19 2019

Temp. 25.0 C / 298.1 K  
 Operator: Liu

Relax. delay 0.010 sec  
 Pulse 45.0 degrees  
 Acq. time 0.064 sec  
 Width 32064.1 Hz  
 1000 repetitions  
 OBSERVE B11, 160.3466912 MHz  
 DATA PROCESSING  
 Line broadening 0.5 Hz  
 FT size 4096  
 Total time 1 min 23 sec

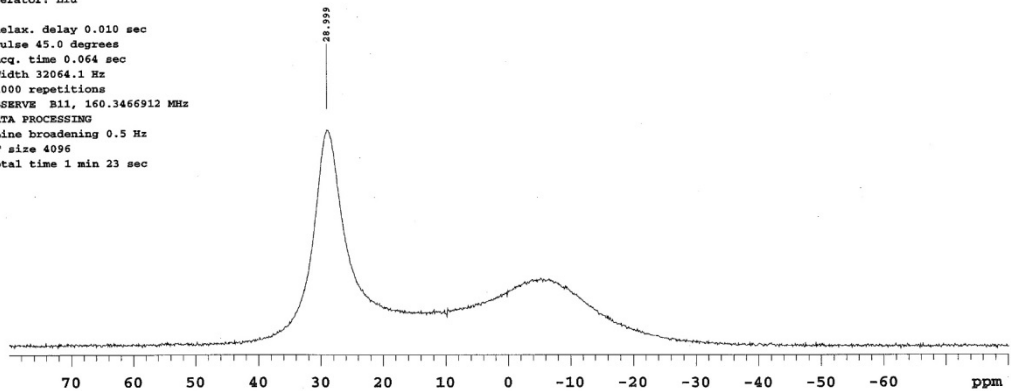

Sample Name:  
 Data Collected on: nmr18-vmrs500  
 Archive directory:  
 Sample directory: F

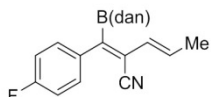

FidFile: PROTON  
 Pulse Sequence: PROTON (s2pul)  
 Solvent: cdcl3  
 Data collected on: Jul 16 2019

Temp. 25.0 C / 298.1 K  
 Operator: Liu

Relax. delay 10.000 sec  
 Pulse 45.0 degrees  
 Acq. time 2.045 sec  
 Width 8012.8 Hz  
 6 repetitions  
 OBSERVE H1, 499.8762802 MHz  
 DATA PROCESSING  
 FT size 32768  
 Total time 20 min

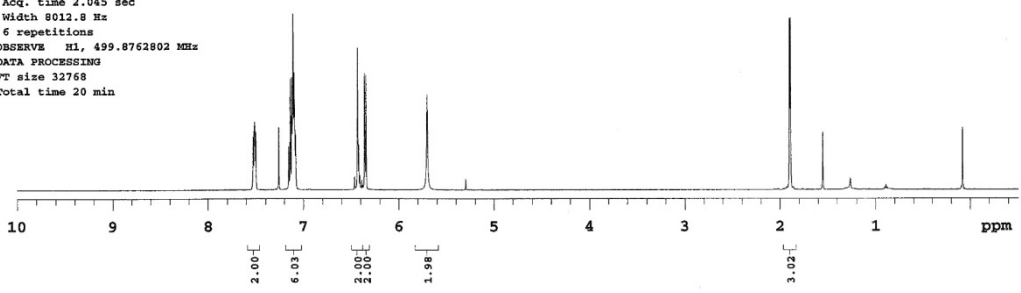

Sample Name:

Data Collected on:  
nmr19-vnmrs600  
Archive directory:

Sample directory:

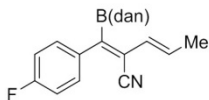

FidFile: CARBON

Pulse Sequence: CARBON (s2pul)  
Solvent: cdcl3  
Data collected on: Jul 17 2019

Temp. 25.0 C / 298.1 K  
Operator: Liu

Relax. delay 1.000 sec  
Pulse 45.0 degrees  
Acq. time 0.865 sec  
Width 37878.8 Hz  
1808 repetitions  
OBSERVE C13, 150.7898604 MHz  
DECOUPLE H1, 599.6839027 MHz  
Power 42 dB  
continuously on  
WALTZ-16 modulated  
DATA PROCESSING  
Line broadening 0.5 Hz  
FT size 65536  
Total time 2 hr, 4 min

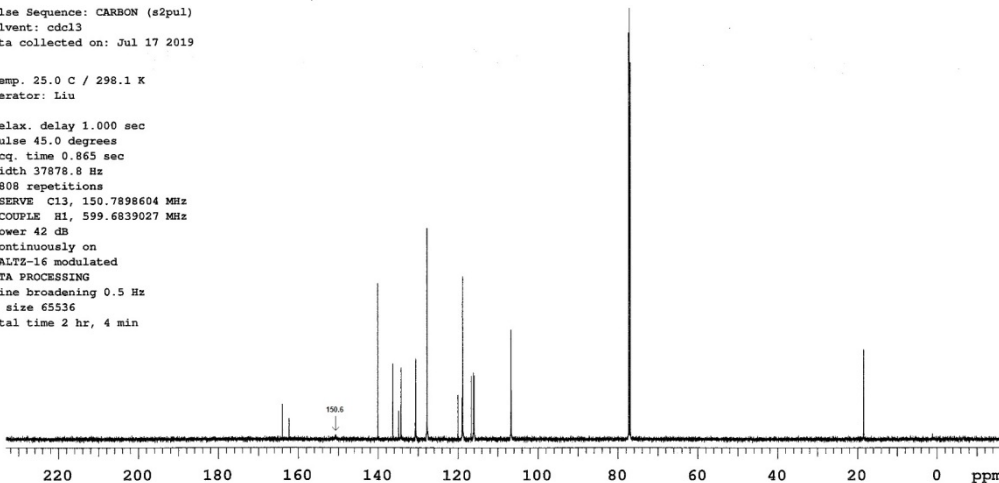

Sample Name:

Data Collected on:  
nmr11-inova500  
Archive directory:

Sample directory:

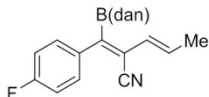

FidFile: B11

Pulse Sequence: s2pul  
Solvent: cdcl3  
Data collected on: Jul 16 2019

Temp. 25.0 C / 298.1 K  
Operator: Liu

Relax. delay 0.010 sec  
Pulse 45.0 degrees  
Acq. time 0.064 sec  
Width 32064.1 Hz  
1000 repetitions  
OBSERVE B11, 160.3465659 MHz  
DATA PROCESSING  
Line broadening 0.5 Hz  
FT size 4096  
Total time 1 min 23 sec

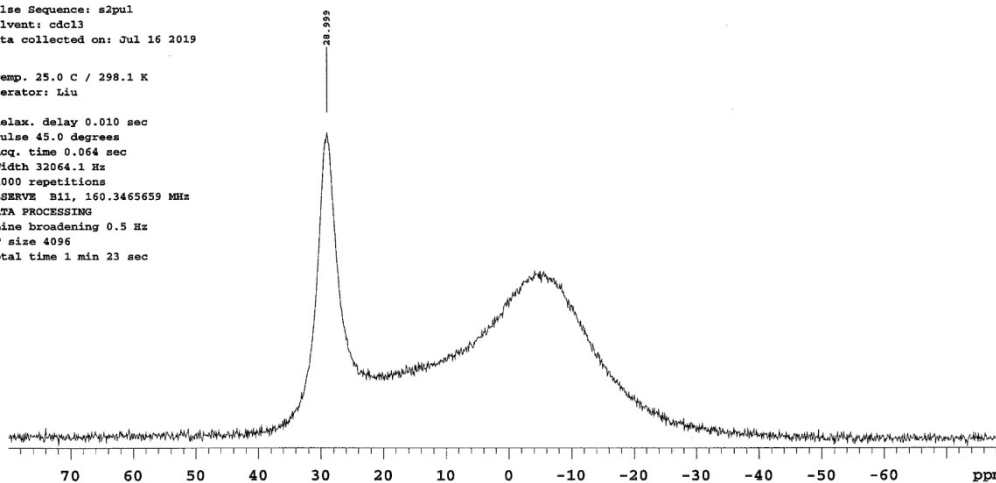

Agilent Technologies

STANDARD FLUORINE PARAMETERS

Sample Name:

Data Collected on:  
nmr18-vmrs500

Archive directory:

Sample directory:

FidFile: FLUORINE

Pulse Sequence: FLUORINE (s2pul)  
Solvent: cdcl3  
Data collected on: Jul 16 2019

Temp. 25.0 C / 298.1 K  
Operator: Liu

Relax. delay 1.000 sec  
Pulse 30.0 degrees  
Acq. time 0.603 sec  
Width 108.7 kHz  
14 repetitions  
OBSERVE F19, 470.3536374 MHz  
DATA PROCESSING  
FT size 131072  
Total time 1 min 4 sec

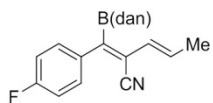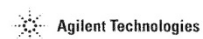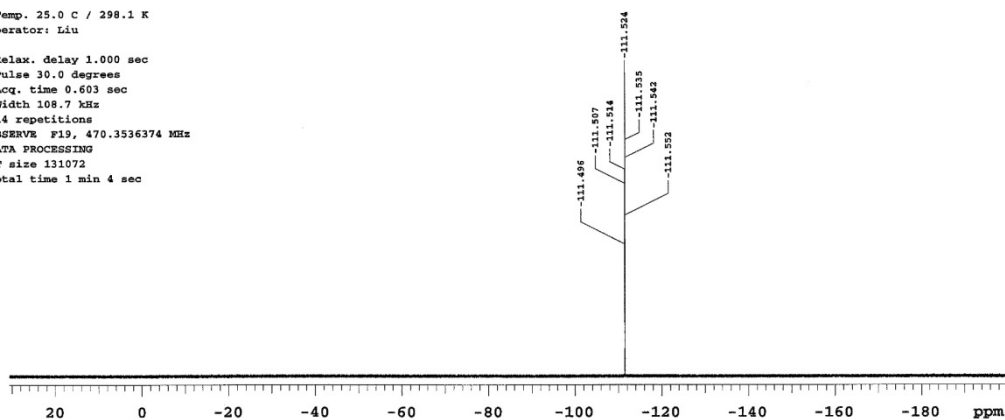

Sample Name:

Data Collected on:  
nmr18-vmrs500

Archive directory:

Sample directory:

FidFile: yz-3-190909

Pulse Sequence: PROTON (s2pul)  
Solvent: thf  
Data collected on: Sep 9 2019

Temp. 25.0 C / 298.1 K  
Operator: Liu

Relax. delay 10.000 sec  
Pulse 45.0 degrees  
Acq. time 2.045 sec  
Width 8012.8 Hz  
4 repetitions  
OBSERVE H1, 499.8790461 MHz  
DATA PROCESSING  
FT size 32768  
Total time 1 min 36 sec

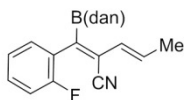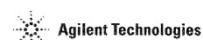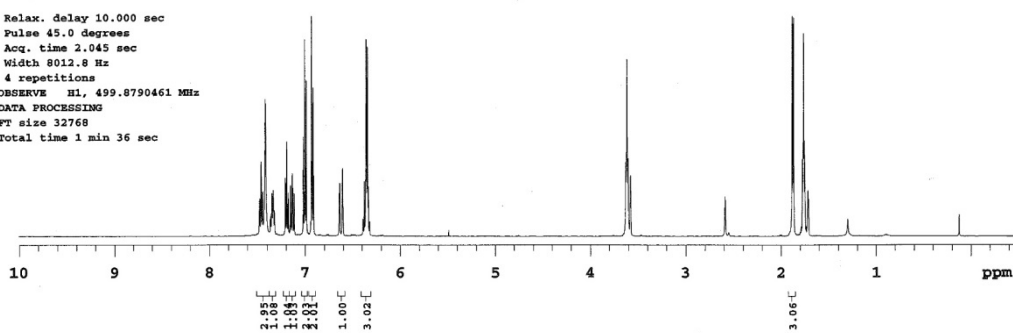

Sample Name:  
 Data Collected on:  
 nmr18-vmars500  
 Archive directory:  
 Sample directory:  
 FidFile: CARBON

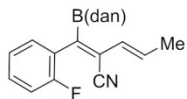

Pulse Sequence: CARBON (s2pul)  
 Solvent: thf  
 Data collected on: Sep 9 2019

Temp. 25.0 C / 298.1 K  
 Operator: Liu

Relax. delay 1.000 sec  
 Pulse 45.0 degrees  
 Acq. time 1.049 sec  
 Width 31250.0 Hz  
 100 repetitions  
 OBSERVE C13, 125.6946947 MHz  
 DECOUPLE H1, 499.8806042 MHz  
 Power 45 dB  
 continuously on  
 WALTZ-16 modulated  
 DATA PROCESSING  
 Line broadening 0.5 Hz  
 FT size 65536  
 Total time 3 min 25 sec

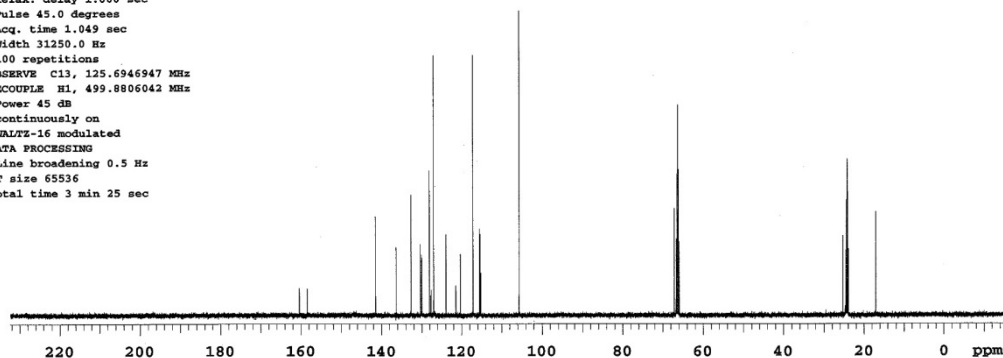

Sample Name:  
 Data Collected on:  
 nmr11-inova500  
 Archive directory:  
 Sample directory:  
 FidFile: B11

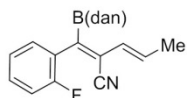

Pulse Sequence: s2pul  
 Solvent: thf  
 Data collected on: Sep 9 2019

Temp. 25.0 C / 298.1 K  
 Operator: Liu

Relax. delay 0.010 sec  
 Pulse 45.0 degrees  
 Acq. time 0.064 sec  
 Width 32064.1 Hz  
 100 repetitions  
 OBSERVE B11, 160.3473094 MHz  
 DATA PROCESSING  
 Line broadening 0.5 Hz  
 FT size 4096  
 Total time 0 min 8 sec

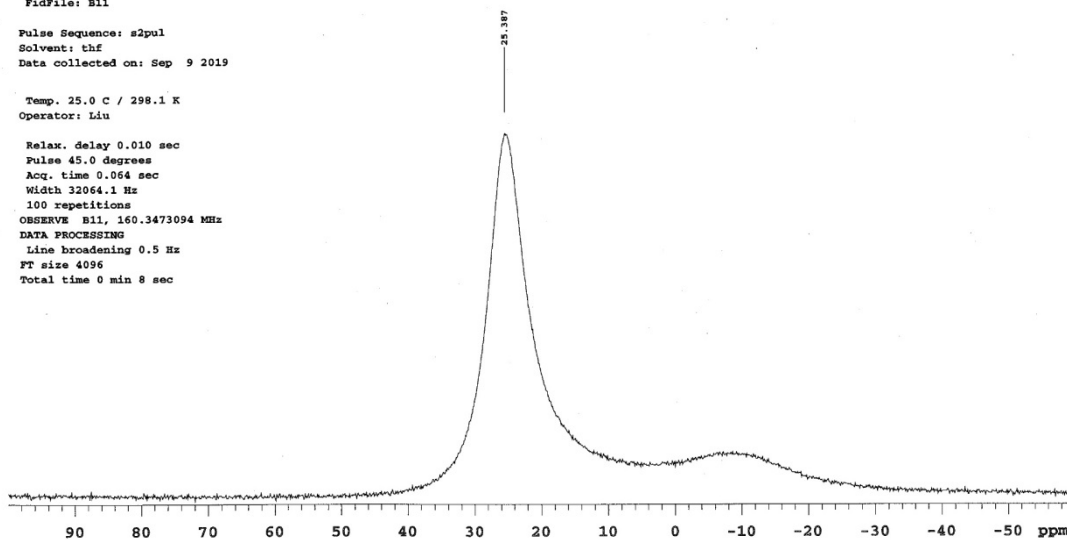

STANDARD FLUORINE PARAMETERS

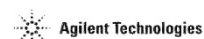

Sample Name:

Data Collected on:  
nmr18-vnmrs500  
Archive directory:  
Sample directory:  
FidFile: FLUORINE

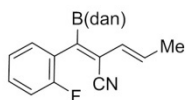

Pulse Sequence: FLUORINE (s2pul)  
Solvent: thf  
Data collected on: Sep 9 2019

Temp. 25.0 C / 298.1 K  
Operator: Liu

Relax. delay 1.000 sec  
Pulse 30.0 degrees  
Acq. time 0.603 sec  
Width 108.7 kHz  
4 repetitions  
OBSERVE F19, 470.3553589 MHz  
DATA PROCESSING  
FT size 131072  
Total time 0 min 6 sec

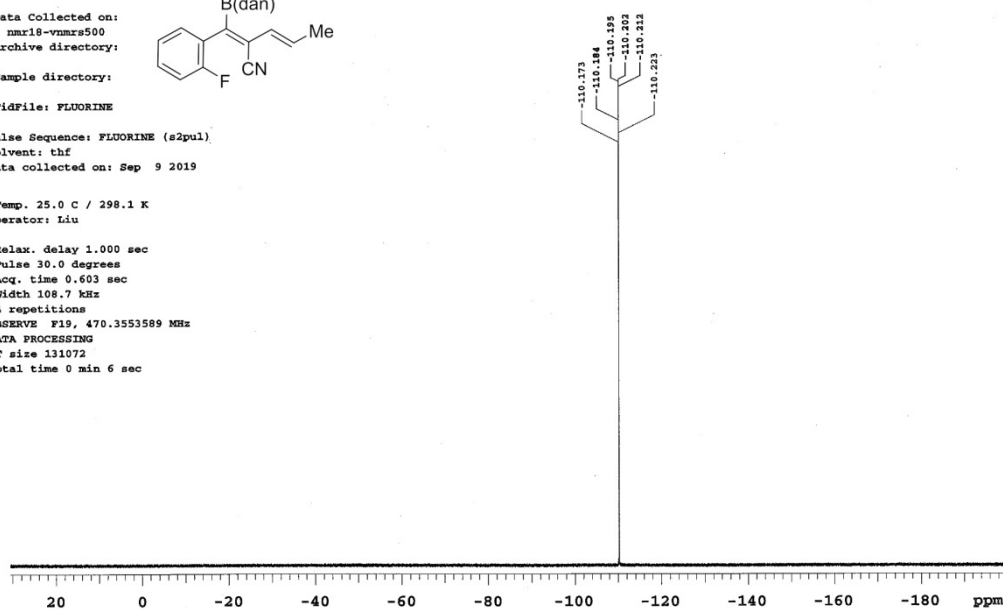

Sample Name:

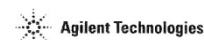

Data Collected on:  
nmr18-vnmrs500  
Archive directory:  
Sample directory:  
FidFile: PROTON

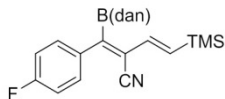

Pulse Sequence: PROTON (s2pul)  
Solvent: cdcl3  
Data collected on: Sep 3 2019

Temp. 25.0 C / 298.1 K  
Operator: Liu

Relax. delay 10.000 sec  
Pulse 45.0 degrees  
Acq. time 2.045 sec  
Width 8012.8 Hz  
6 repetitions  
OBSERVE H1, 499.8762806 MHz  
DATA PROCESSING  
FT size 32768  
Total time 2 min 0 sec

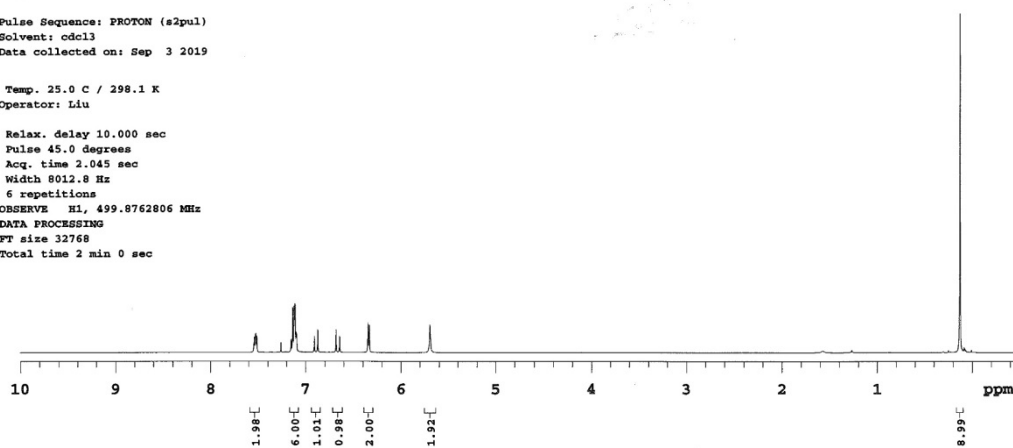

Sample Name:  
 Data Collected on:  
 nmr18-vnmrs500  
 Archive directory:  
 Sample directory:  
 Fidfile: CARBON  
 Pulse Sequence: CARBON (s2pul)  
 Solvent: cdcl3  
 Data collected on: Sep 3 2019

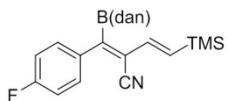

Temp. 25.0 C / 298.1 K  
 Operator: Liu

Relax. delay 1.000 sec  
 Pulse 45.0 degrees  
 Acq. time 1.049 sec  
 Width 31250.0 Hz  
 210 repetitions  
 OBSERVE C13, 125.6939792 MHz  
 DECOUPLE H1, 499.8787746 MHz  
 Power 45 dB  
 continuously on  
 WALTZ-16 modulated  
 DATA PROCESSING  
 Line broadening 0.5 Hz  
 FT size 65536  
 Total time 34 min

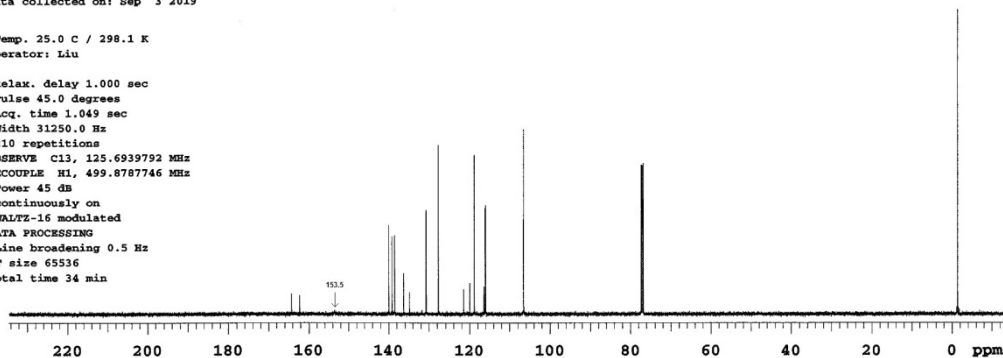

Sample Name:  
 Data Collected on:  
 nmrl1-inova500  
 Archive directory:  
 Sample directory:  
 Fidfile: B11  
 Pulse Sequence: s2pul  
 Solvent: cdcl3  
 Data collected on: Sep 3 2019

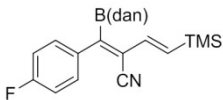

Temp. 25.0 C / 298.1 K  
 Operator: Liu

Relax. delay 0.010 sec  
 Pulse 45.0 degrees  
 Acq. time 0.064 sec  
 Width 32064.1 Hz  
 1000 repetitions  
 OBSERVE B11, 160.3465816 MHz  
 DATA PROCESSING  
 Line broadening 0.5 Hz  
 FT size 4096  
 Total time 1 min 23 sec

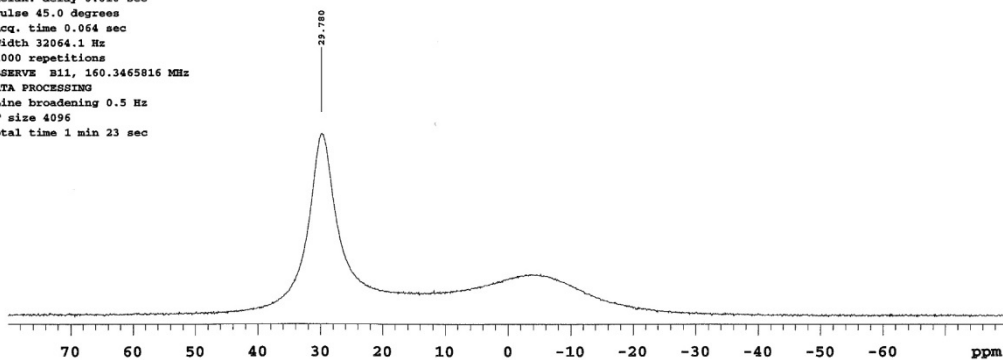

STANDARD FLUORINE PARAMETERS

Sample Name:

Data Collected on:  
nmr18-vnmrs500

Archive directory:

Sample directory:

FidFile: yz-3-190223-p-F-tms-F

Pulse Sequence: FLUORINE (s2pul)  
Solvent: cdcl3  
Data collected on: Feb 23 2020

Temp. 25.0 C / 298.1 K  
Operator: Liu

Relax. delay 1.000 sec  
Pulse 30.0 degrees  
Acq. time 0.603 sec  
Width 108.7 kHz  
20 repetitions  
OBSERVE F19, 470.3533800 MHz  
DATA PROCESSING  
FT size 131072  
Total time 0 min 32 sec

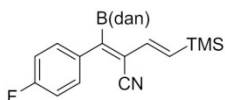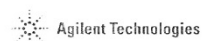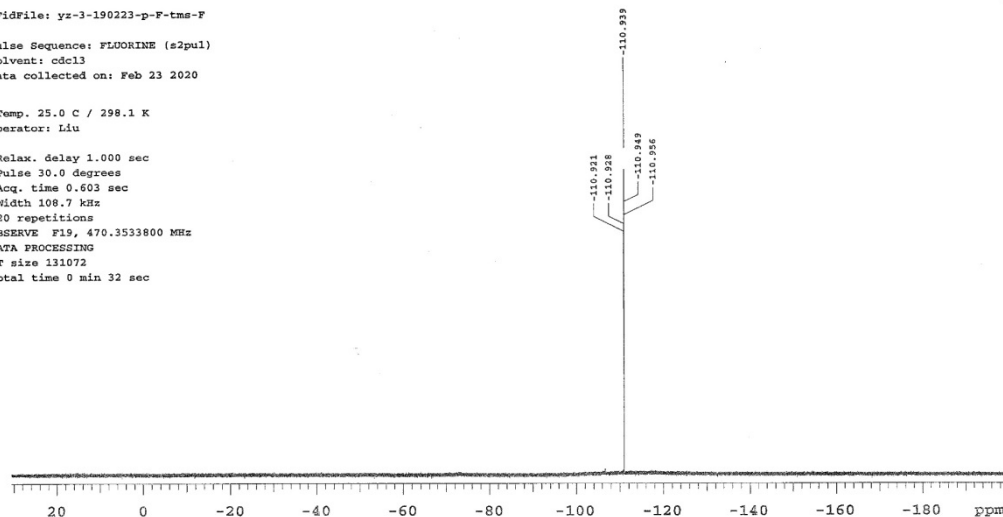

Sample Name:

Data Collected on:  
nmr19-vnmrs600

Archive directory:

Sample directory:

FidFile: PROTON

Pulse Sequence: PROTON (s2pul)  
Solvent: cdcl3  
Data collected on: Mar 19 2020

Temp. 25.0 C / 298.1 K  
Operator: Liu

Relax. delay 10.000 sec  
Pulse 45.0 degrees  
Acq. time 1.704 sec  
Width 9615.4 Hz  
10 repetitions  
OBSERVE H1, 599.6806838 MHz  
DATA PROCESSING  
FT size 32768  
Total time 1 min 57 sec

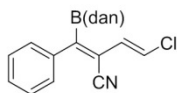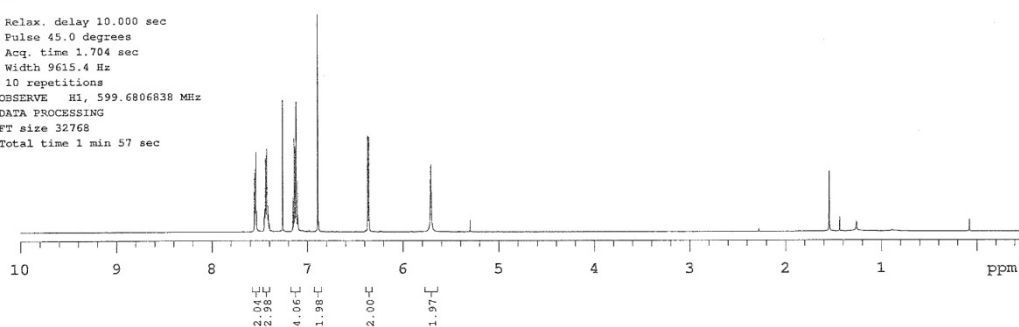

Sample Name:

Data Collected on:  
nmr19-vnmrs600  
Archive directory:

Sample directory:

FidFile: CARBON

Pulse Sequence: CARBON (s2pul)  
Solvent: cdcl3  
Data collected on: Mar 18 2020

Temp. 25.0 C / 298.1 K  
Operator: Liu

Relax. delay 1.000 sec  
Pulse 45.0 degrees  
Acq. time 0.865 sec  
Width 37878.8 Hz  
460 repetitions  
OBSERVE C13, 150.7898050 MHz  
DECOUPLE H1, 599.6836825 MHz  
Power 45 dB  
continuously on  
WALTZ-16 modulated  
DATA PROCESSING  
Line broadening 0.5 Hz  
FT size 65536  
Total time 31 min

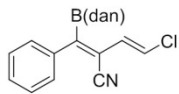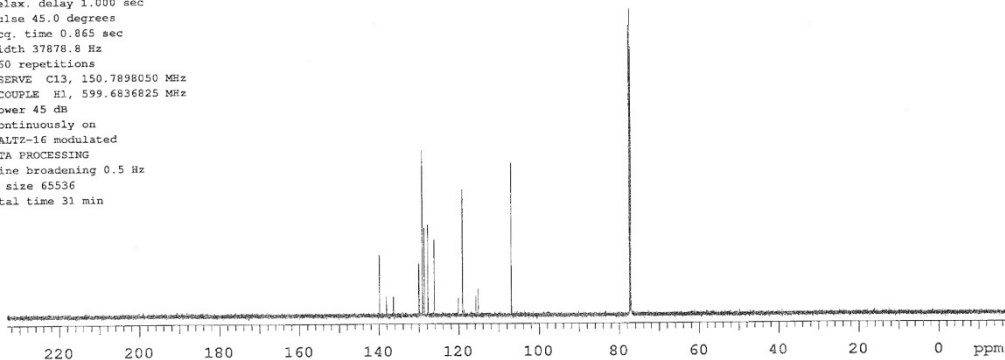

Sample Name:

Data Collected on:  
nmr11-inova500  
Archive directory:

Sample directory:

FidFile: B11

Pulse Sequence: s2pul  
Solvent: cdcl3  
Data collected on: Mar 19 2020

Temp. 25.0 C / 298.1 K  
Operator: Liu

Relax. delay 0.010 sec  
Pulse 45.0 degrees  
Acq. time 0.064 sec  
Width 32064.1 Hz  
3000 repetitions  
OBSERVE H1, 160.3466912 MHz  
DATA PROCESSING  
Line broadening 0.5 Hz  
FT size 4096  
Total time 4 min 8 sec

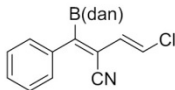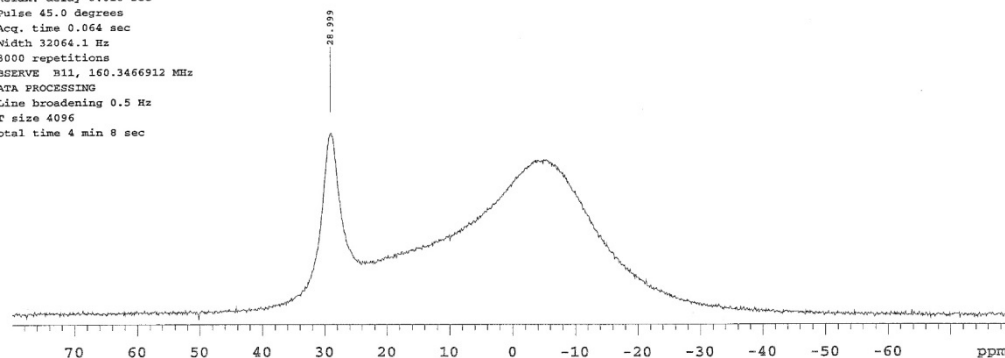

Agilent Technologies



Sample Name:

Data Collected on:  
nmr18-vmrs500  
Archive directory:

Sample directory:

FidFile: PROTON

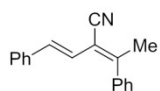

Pulse Sequence: PROTON (s2pul)  
Solvent: cdcl3  
Data collected on: May 18 2019

Temp. 25.0 C / 298.1 K  
Operator: Liu

Relax. delay 10.000 sec  
Pulse 45.0 degrees  
Acq. time 2.045 sec  
Width 8012.8 Hz  
8 repetitions  
OBSERVE H1, 499.8762752 MHz  
DATA PROCESSING  
FT size 32768  
Total time 4 min 1 sec

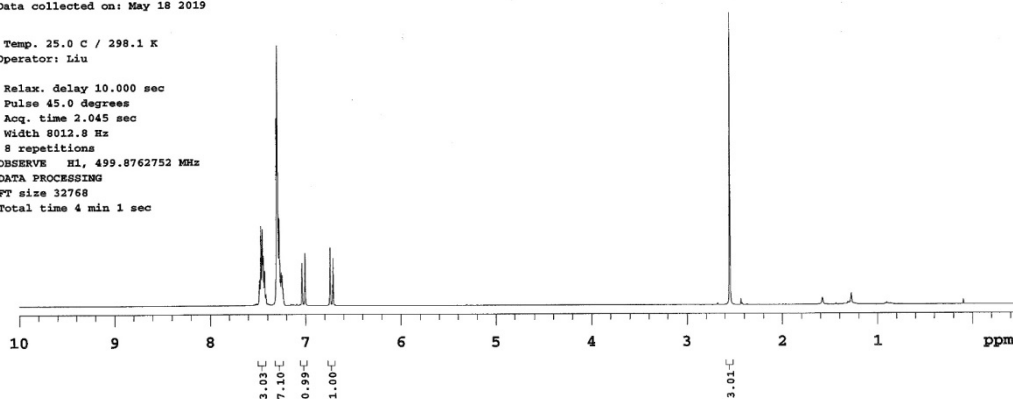

Sample Name:

Data Collected on:  
nmr18-vmrs500  
Archive directory:

Sample directory:

FidFile: CARBON

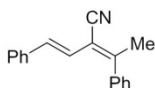

Pulse Sequence: CARBON (s2pul)  
Solvent: cdcl3  
Data collected on: May 18 2019

Temp. 25.0 C / 298.1 K  
Operator: Liu

Relax. delay 1.000 sec  
Pulse 45.0 degrees  
Acq. time 1.049 sec  
Width 31250.0 Hz  
240 repetitions  
OBSERVE C13, 125.6939894 MHz  
DECOUPLE H1, 499.8787746 MHz  
Power 43 dB  
continuously on  
WALTZ-16 modulated  
DATA PROCESSING  
Line broadening 0.5 Hz  
FT size 65536  
Total time 5 hr, 41 min

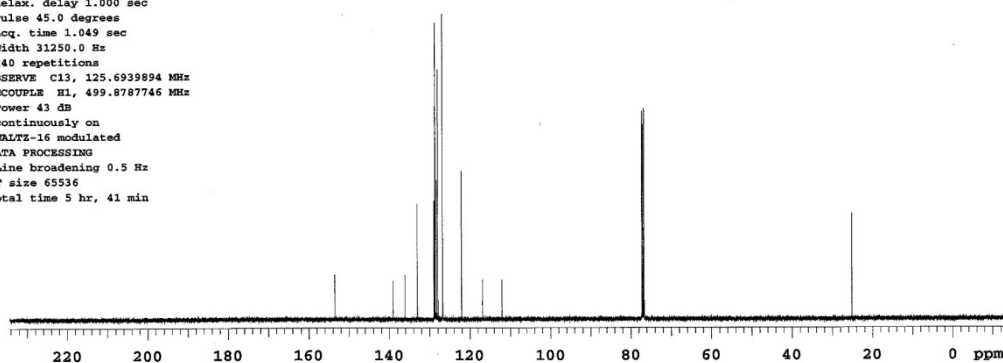

Sample Name:  
 Data Collected on: nmr18-vmrs500  
 Archive directory:  
 Sample directory:  
 FidFile: PROTON  
 Pulse Sequence: PROTON (s2pul)  
 Solvent: cdcl3  
 Data collected on: May 20 2019

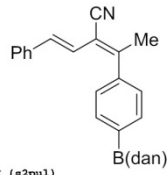

Temp. 25.0 C / 298.1 K  
 Operator: Liu

Relax. delay 10.000 sec  
 Pulse 45.0 degrees  
 Acq. time 2.045 sec  
 Width 8012.8 Hz  
 8 repetitions  
 OBSERVE H1, 499.8762752 MHz  
 DATA PROCESSING  
 FT size 32768  
 Total time 8 min 2 sec

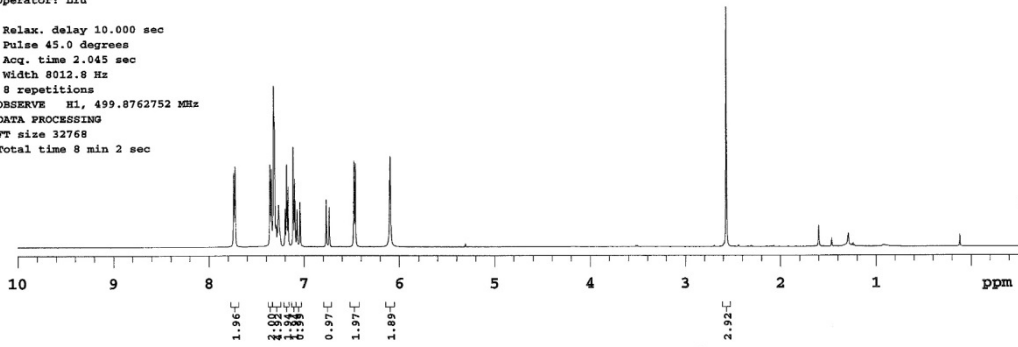

Sample Name:  
 Data Collected on: nmr18-vmrs500  
 Archive directory:  
 Sample directory:  
 FidFile: CARBON  
 Pulse Sequence: CARBON (s2pul)  
 Solvent: cdcl3  
 Data collected on: May 20 2019

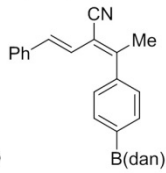

Temp. 25.0 C / 298.1 K  
 Operator: Liu

Relax. delay 1.000 sec  
 Pulse 45.0 degrees  
 Acq. time 1.049 sec  
 Width 31250.0 Hz  
 288 repetitions  
 OBSERVE C13, 125.6939894 MHz  
 DECOUPLE H1, 499.8787746 MHz  
 Power 43 dB  
 continuously on  
 WALTZ-16 modulated  
 DATA PROCESSING  
 Line broadening 0.5 Hz  
 FT size 65536  
 Total time 34 min

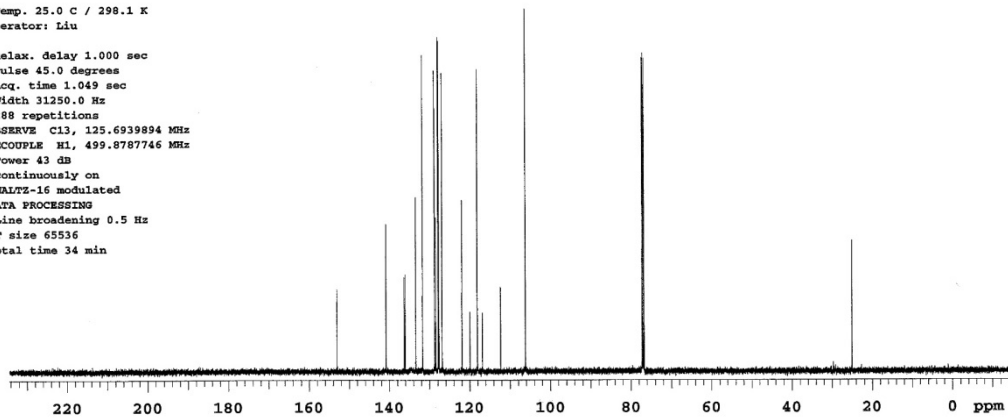

Sample Name:  
 Data Collected on:  
 nmrl1-inova500  
 Archive directory:  
 Sample directory:  
 FidFile: B11  
 Pulse Sequence: s2pul  
 Solvent: cdcl3  
 Data collected on: May 20 2019

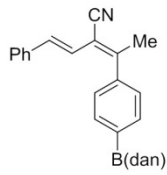

Temp. 25.0 C / 298.1 K  
 Operator: Liu

Relax. delay 0.010 sec  
 Pulse 45.0 degrees  
 Acq. time 0.054 sec  
 Width 32064.1 Hz  
 896 repetitions  
 OBSERVE B11, 160.3467225 MHz  
 DATA PROCESSING  
 Line broadening 0.5 Hz  
 FT size 4096  
 Total time 1 min 25 sec

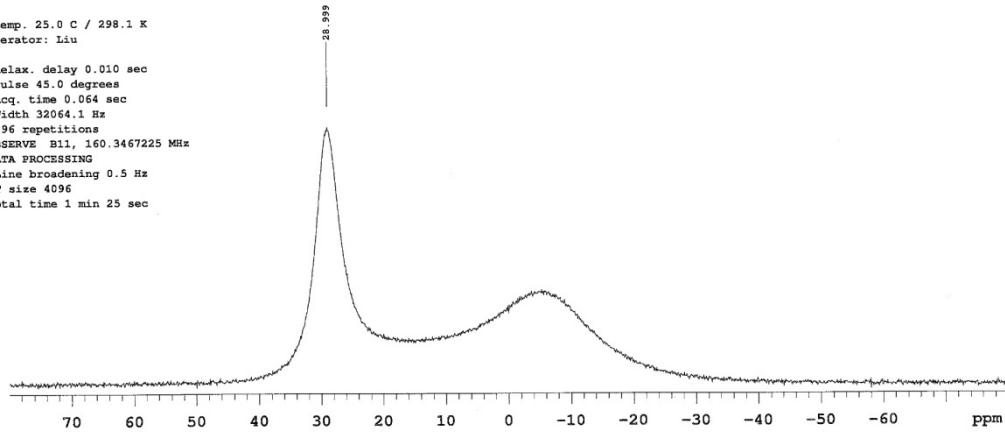

Sample Name:  
 Data Collected on:  
 nmrl9-vnmrs600  
 Archive directory:  
 Sample directory:  
 FidFile: yz-3-190622-fluorination-H  
 Pulse Sequence: PROTON (s2pul)  
 Solvent: cdcl3  
 Data collected on: Jun 22 2019

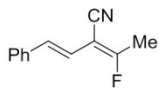

Temp. 25.0 C / 298.1 K  
 Operator: Liu

Relax. delay 10.000 sec  
 Pulse 45.0 degrees  
 Acq. time 1.704 sec  
 Width 9615.4 Hz  
 8 repetitions  
 OBSERVE H1, 599.6808975 MHz  
 DATA PROCESSING  
 FT size 32768  
 Total time 7 min 48 sec

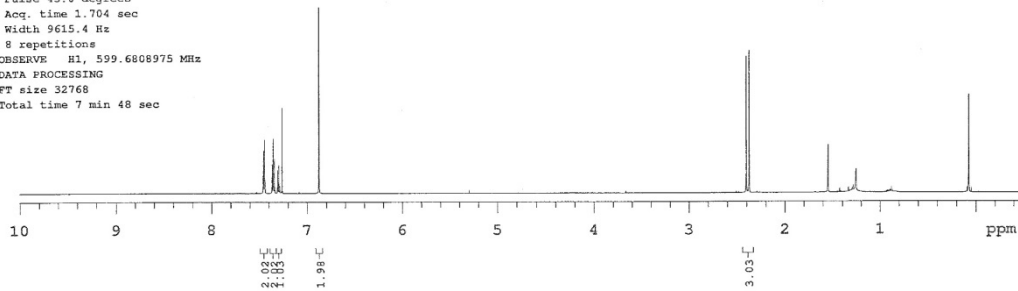

Sample Name:

Data Collected on:  
nmr14-nmrs400  
Archive directory:  
Sample directory:

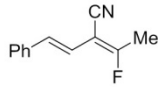

FidFile: yz-3-190622-Fluorination-C

Pulse Sequence: CARBON (s2pul)  
Solvent: cdcl3  
Data collected on: Jun 21 2019

Temp. 25.0 C / 298.1 K  
Operator: Liu

Relax. delay 1.000 sec  
Pulse 45.0 degrees  
Acq. time 1.311 sec  
Width 25000.0 Hz  
8000 repetitions  
OBSERVE C13, 100.5208755 MHz  
DECOUPLE H1, 399.7666112 MHz  
Power 40 dB  
continuously on  
WALTZ-16 modulated  
DATA PROCESSING  
Line broadening 0.5 Hz  
FT size 65536  
Total time 5 hr, 8 min

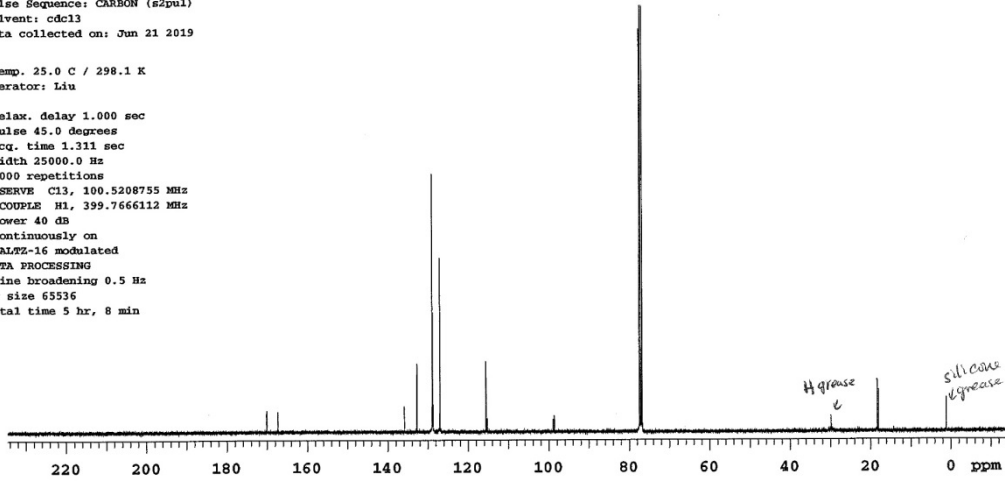

STANDARD FLUORINE PARAMETERS

Sample Name:

Data Collected on:  
nmr19-nmrs600  
Archive directory:  
Sample directory:

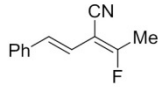

FidFile: FLUORINE

Pulse Sequence: FLUORINE (s2pul)  
Solvent: cdcl3  
Data collected on: Jun 22 2019

Temp. 25.0 C / 298.1 K  
Operator: Liu

Relax. delay 1.000 sec  
Pulse 30.0 degrees  
Acq. time 0.996 sec  
Width 131.6 kHz  
20 repetitions  
OBSERVE F19, 564.2638160 MHz  
DATA PROCESSING  
FT size 262144  
Total time 3 min 20 sec

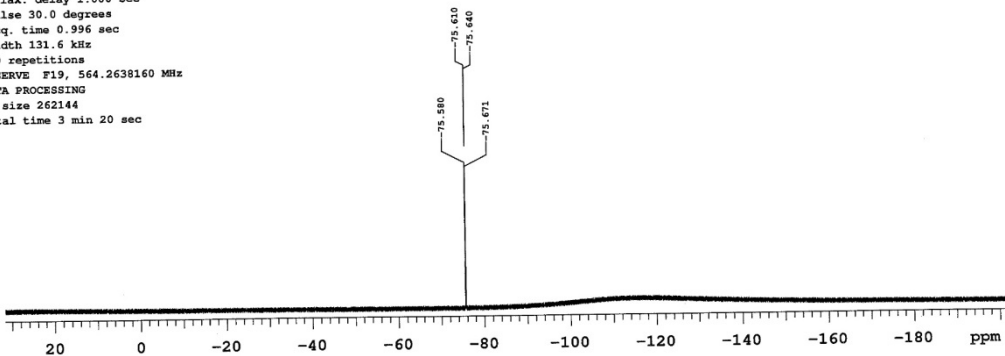

Sample Name:

Data Collected on:  
nmr18-vnmrs500  
Archive directory:

Sample directory:

FidFile: yz-4-276H-4

Pulse Sequence: PROTON (s2pul)  
Solvent: cdcl3  
Data collected on: Mar 19 2020

Temp. 25.0 C / 298.1 K  
Operator: Liu

Relax. delay 10.000 sec  
Pulse 45.0 degrees  
Acq. time 2.045 sec  
Width 8012.8 Hz  
6 repetitions  
OBSERVE H1, 499.8760066 MHz  
DATA PROCESSING  
FT size 32768  
Total time 1 min 12 sec

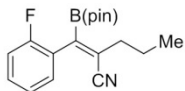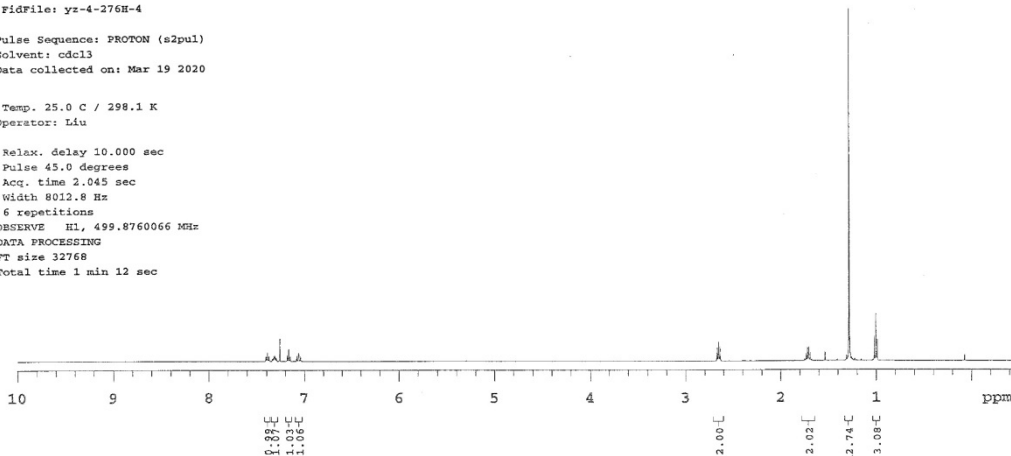

Sample Name:

Data Collected on:  
nmr18-vnmrs500  
Archive directory:

Sample directory:

FidFile: CARBON

Pulse Sequence: CARBON (s2pul)  
Solvent: cdcl3  
Data collected on: Mar 19 2020

Temp. 25.0 C / 298.1 K  
Operator: Liu

Relax. delay 1.000 sec  
Pulse 45.0 degrees  
Acq. time 1.049 sec  
Width 31250.0 Hz  
1284 repetitions  
OBSERVE C13, 125.6939008 MHz  
DECOUPLE H1, 499.8785010 MHz  
Power 44 dB  
continuously on  
WALTZ-16 modulated  
DATA PROCESSING  
Line broadening 0.5 Hz  
FT size 65536  
Total time 1 hr, 8 min

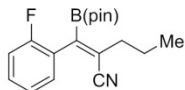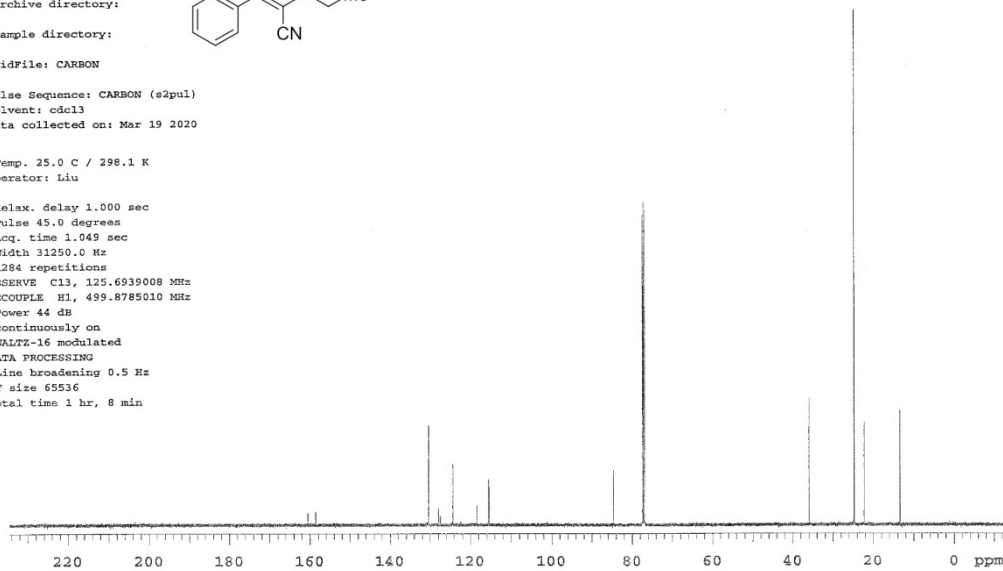

Sample Name:  
 Data Collected on: nmr11-inova500  
 Archive directory:  
 Sample directory:  
 FidFile: B11

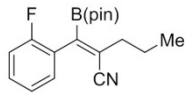

Pulse Sequence: s2pul  
 Solvent: cdcl3  
 Data collected on: Mar 19 2020

Temp. 25.0 C / 298.1 K  
 Operator: Liu

Relax. delay 0.010 sec  
 Pulse 45.0 degrees  
 Acq. time 0.064 sec  
 Width 32064.1 Hz  
 1000 repetitions  
 OBSERVE B11, 160.3467068 MHz  
 DATA PROCESSING  
 Line broadening 0.5 Hz  
 FT size 4096  
 Total time 1 min 23 sec

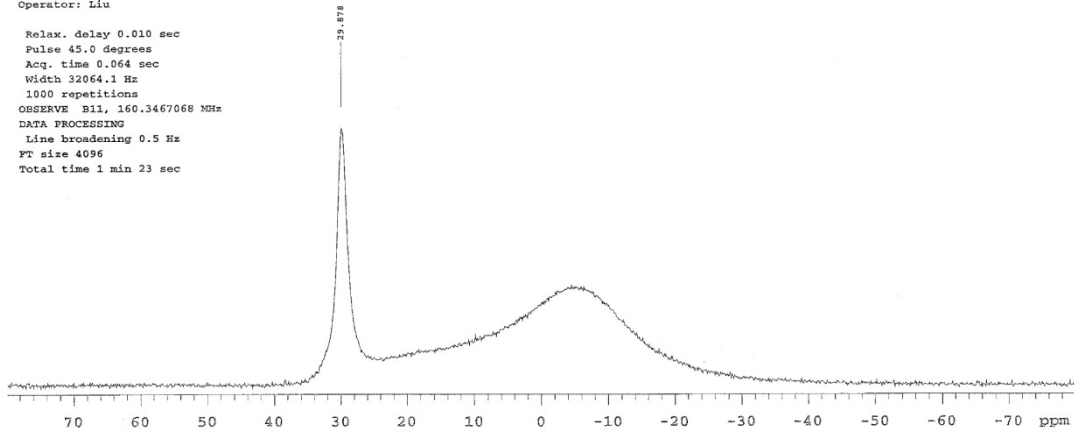

STANDARD FLUORINE PARAMETERS

Sample Name:  
 Data Collected on: nmr18-vnmrs500  
 Archive directory:  
 Sample directory:  
 FidFile: yz-4-276F-4

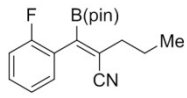

Pulse Sequence: FLUORINE (s2pul)  
 Solvent: cdcl3  
 Data collected on: Mar 19 2020

Temp. 25.0 C / 298.1 K  
 Operator: Liu

Relax. delay 1.000 sec  
 Pulse 30.0 degrees  
 Acq. time 0.603 sec  
 Width 108.7 kHz  
 4 repetitions  
 OBSERVE F19, 470.3533800 MHz  
 DATA PROCESSING  
 FT size 131072  
 Total time 0 min 6 sec

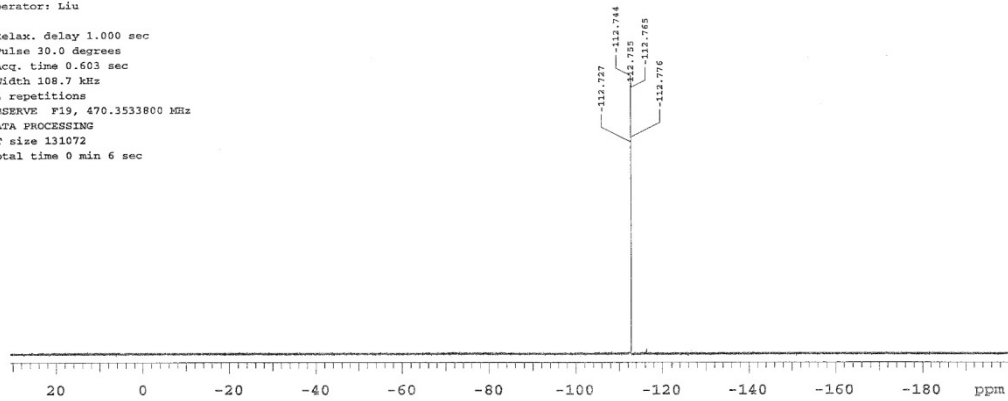

Sample Name:

Data Collected on:  
nmr19-vnmrs600  
Archive directory:

Sample directory:

FidFile: PROTON

Pulse Sequence: PROTON (s2pul)  
Solvent: cdcl3  
Data collected on: Nov 6 2019

Temp. 25.0 C / 298.1 K  
Operator: Liu

Relax. delay 10.000 sec  
Pulse 45.0 degrees  
Acq. time 1.704 sec  
Width 9615.4 Hz  
4 repetitions  
OBSERVE H1, 599.6806832 MHz  
DATA PROCESSING  
FT size 32768  
Total time 0 min 47 sec

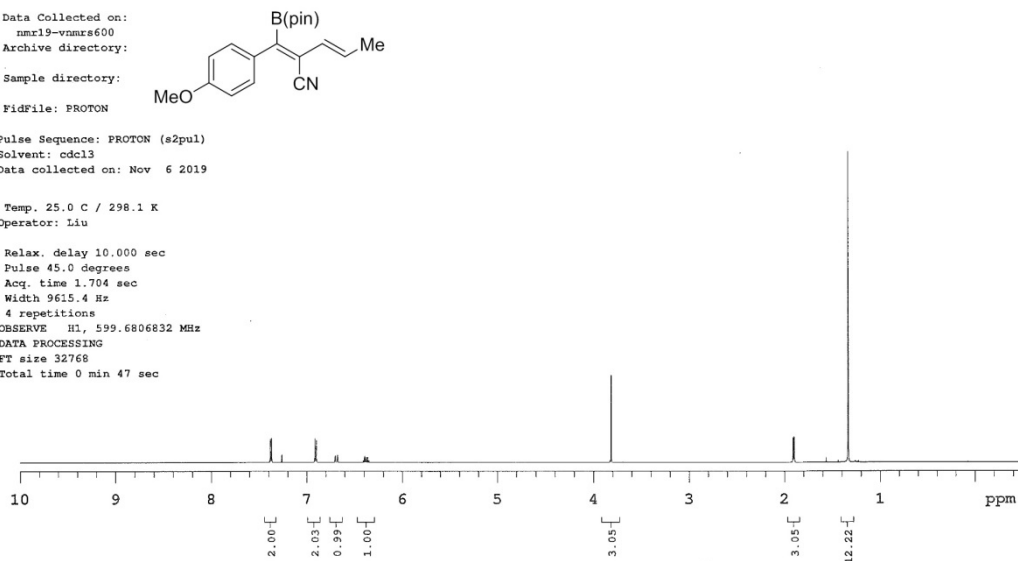

Sample Name:

Data Collected on:  
nmr19-vnmrs600  
Archive directory:

Sample directory:

FidFile: CARBON

Pulse Sequence: CARBON (s2pul)  
Solvent: cdcl3  
Data collected on: Nov 6 2019

Temp. 25.0 C / 298.1 K  
Operator: Liu

Relax. delay 1.000 sec  
Pulse 45.0 degrees  
Acq. time 0.865 sec  
Width 37878.8 Hz  
400 repetitions  
OBSERVE C13, 150.7898074 MHz  
DECUPLE H1, 599.6836825 MHz  
Power 46 dB  
continuously on  
WALTZ-16 modulated  
DATA PROCESSING  
Line broadening 0.5 Hz  
FT size 65536  
Total time 31 min

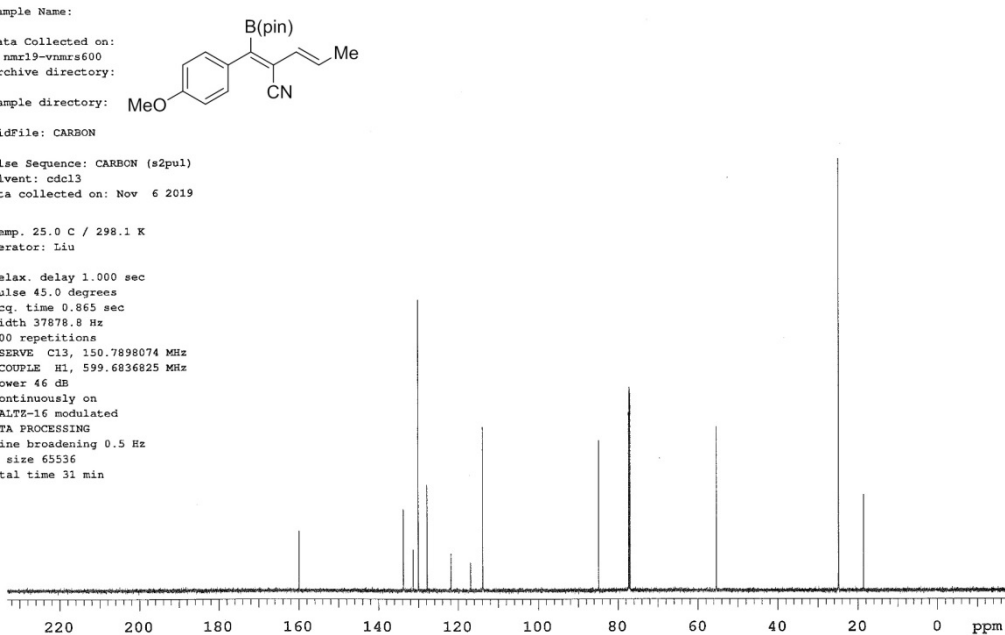

Sample Name:  
 Data Collected on:  
 Archive directory:  
 Sample directory:  
 FidFile: B11

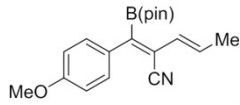

Pulse Sequence: s2pul  
 Solvent: cdcl3  
 Data collected on: Sep 21 2019

Temp. 25.0 C / 298.1 K  
 Operator: Liu

Relax. delay 0.010 sec  
 Pulse 45.0 degrees  
 Acq. time 0.064 sec  
 Width 32064.1 Hz  
 1000 repetitions  
 OBSERVE B11, 160.3466912 MHz  
 DATA PROCESSING  
 Line broadening 0.5 Hz  
 FT size 4096  
 Total time 1 min 23 sec

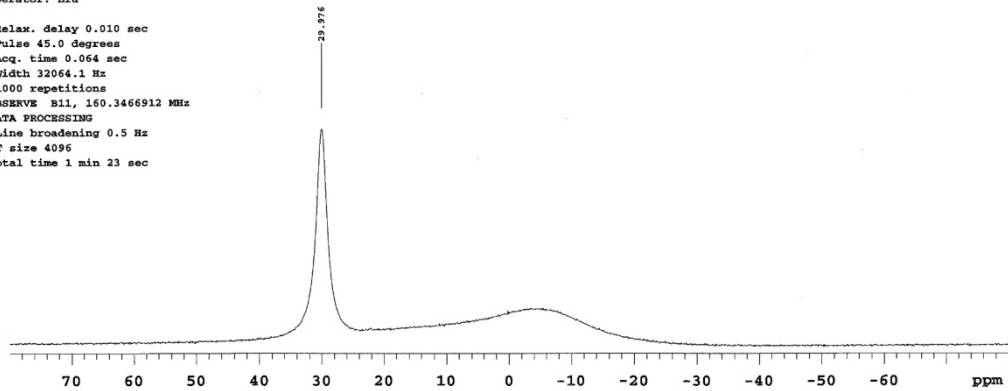

Sample Name:  
 Data Collected on:  
 Archive directory:  
 Sample directory:  
 FidFile: PROTON

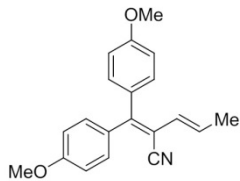

Pulse Sequence: PROTON (s2pul)  
 Solvent: cdcl3  
 Data collected on: Oct 2 2019

Temp. 25.0 C / 298.1 K  
 Operator: Liu

Relax. delay 10.000 sec  
 Pulse 45.0 degrees  
 Acq. time 2.045 sec  
 Width 8012.8 Hz  
 8 repetitions  
 OBSERVE H1, 499.8762802 MHz  
 DATA PROCESSING  
 FT size 32768  
 Total time 1 min 36 sec

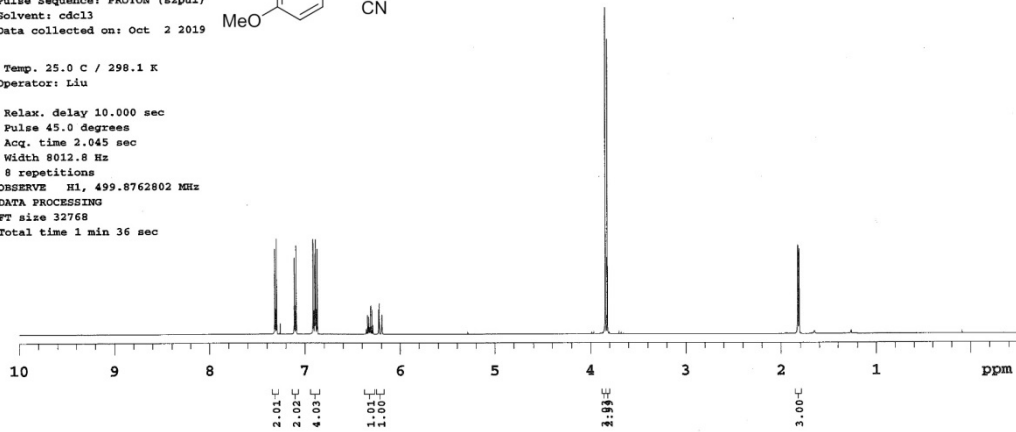



Sample Name:  
 Data Collected on:  
 nmr18-vnmrs500  
 Archive directory:  
 Sample directory:  
 FidFile: yz-4-182C-2-pure  
 Pulse Sequence: CARBON (s2pul)  
 Solvent: cdcl3  
 Data collected on: Oct 2 2019

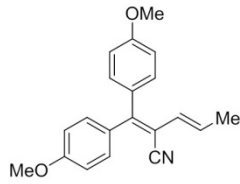

Temp. 25.0 C / 298.1 K  
 Operator: Liu  
 Relax. delay 1.000 sec  
 Pulse 45.0 degrees  
 Acq. time 1.049 sec  
 Width 31250.0 Hz  
 164 repetitions  
 OBSERVE C13, 125.6939792 MHz  
 DECOUPLE H1, 499.8787746 MHz  
 Power 45 dB  
 continuously on  
 WALTZ-16 modulated  
 DATA PROCESSING  
 Line broadening 0.5 Hz  
 FT size 65536  
 Total time 34 min

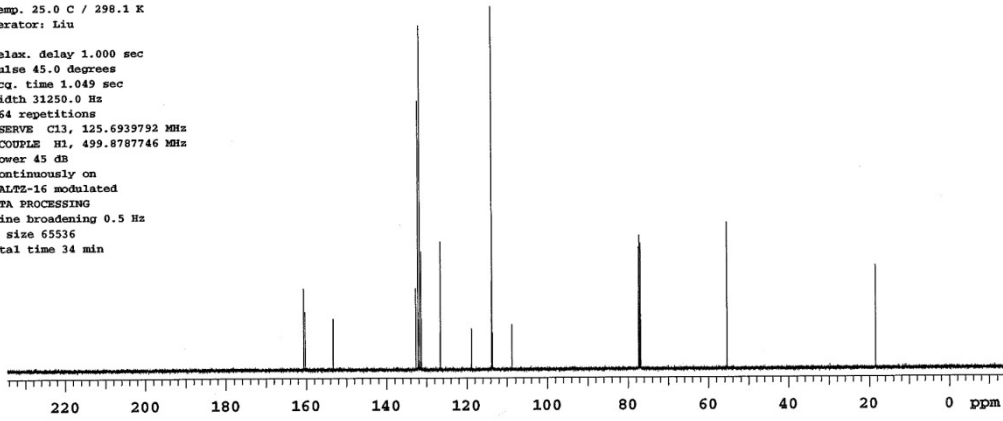

Sample Name:  
 Data Collected on:  
 nmr18-vnmrs500  
 Archive directory:  
 Sample directory:  
 FidFile: PROTON  
 Pulse Sequence: PROTON (s2pul)  
 Solvent: cdcl3  
 Data collected on: Nov 15 2019

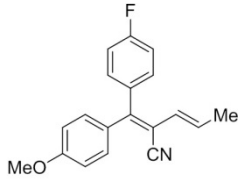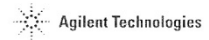

Temp. 25.0 C / 298.1 K  
 Operator: Liu  
 Relax. delay 10.000 sec  
 Pulse 45.0 degrees  
 Acq. time 2.045 sec  
 Width 8012.8 Hz  
 4 repetitions  
 OBSERVE H1, 499.8762806 MHz  
 DATA PROCESSING  
 FT size 32768  
 Total time 0 min 48 sec

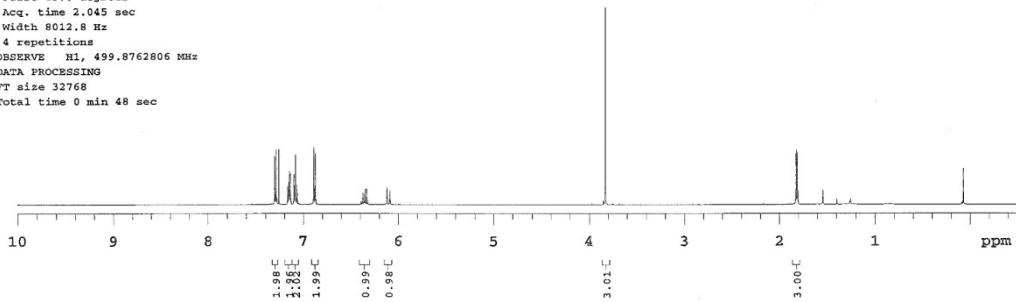

Sample Name:  
 Data Collected on:  
 nmr18-vmars500  
 Archive directory:  
 Sample directory:  
 FidFile: CARBON  
 Pulse Sequence: CARBON (s2pul)  
 Solvent: cdcl3  
 Data collected on: Nov 15 2019

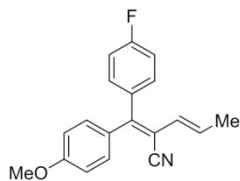

Temp. 25.0 C / 298.1 K  
 Operator: Liu  
 Relax. delay 1.000 sec  
 Pulse 45.0 degrees  
 Acq. time 1.049 sec  
 Width 31250.0 Hz  
 824 repetitions  
 OBSERVE C13, 125.6939696 MHz  
 DECOUPLE H1, 499.8787746 MHz  
 Power 45 dB  
 continuously on  
 WALTZ-16 modulated  
 DATA PROCESSING  
 Line broadening 0.5 Hz  
 FT size 65536  
 Total time 34 min

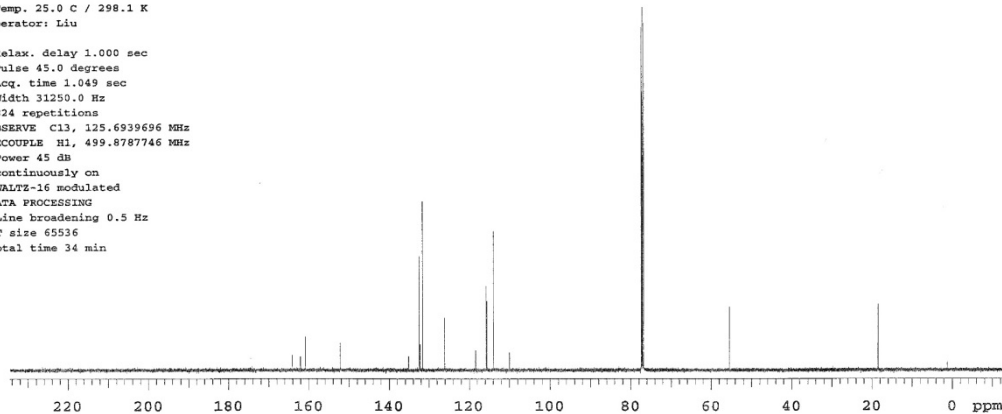

STANDARD FLUORINE PARAMETERS

Sample Name:  
 Data Collected on:  
 nmr18-vmars500  
 Archive directory:  
 Sample directory:  
 FidFile: FLUORINE  
 Pulse Sequence: FLUORINE (s2pul)  
 Solvent: cdcl3  
 Data collected on: Nov 15 2019

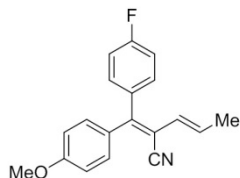

Temp. 25.0 C / 298.1 K  
 Operator: Liu  
 Relax. delay 1.000 sec  
 Pulse 30.0 degrees  
 Acq. time 0.603 sec  
 Width 108.7 kHz  
 20 repetitions  
 OBSERVE F19, 470.3536374 MHz  
 DATA PROCESSING  
 FT size 131072  
 Total time 0 min 32 sec

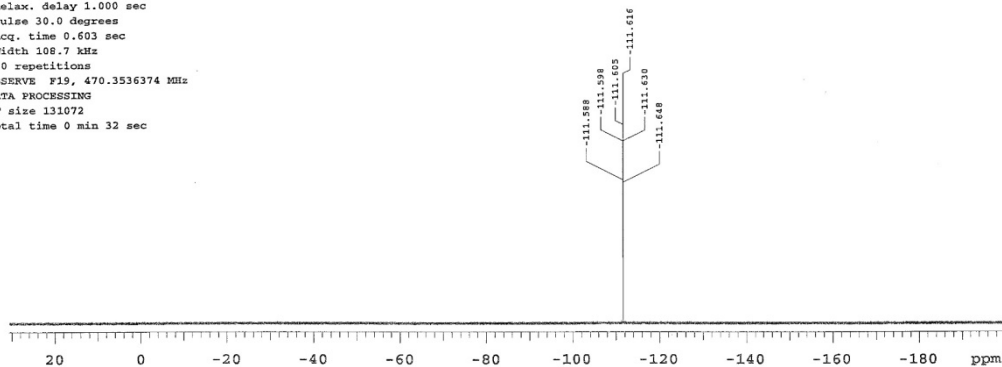

Sample Name:  
 Data Collected on:  
 nmr19-vnmrs600  
 Archive directory:  
 Sample directory:  
 FidFile: yz-4-242H-1  
 Pulse Sequence: PROTON (s2pul)  
 Solvent: cdcl3  
 Data collected on: Jan 3 2020

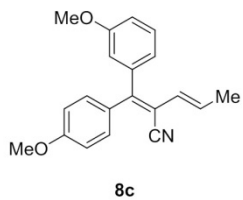

Temp. 25.0 C / 298.1 K  
 Operator: Liu

Relax. delay 10.000 sec  
 Pulse 45.0 degrees  
 Acq. time 1.704 sec  
 Width 9615.4 Hz  
 S<sup>2</sup> repetitions  
 OBSERVE H1, 599.6806841 MHz  
 DATA PROCESSING  
 FT size 32768  
 Total time 1 min 57 sec

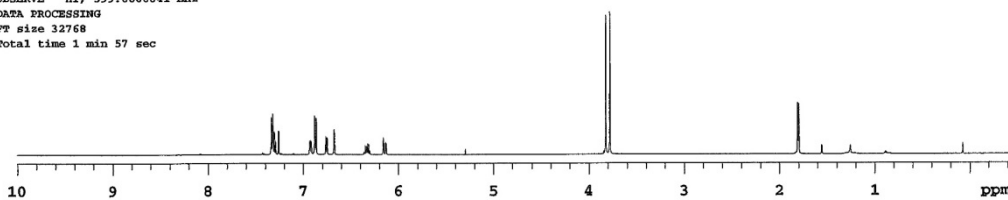

Sample Name:  
 Data Collected on:  
 nmr19-vnmrs600  
 Archive directory:  
 Sample directory:  
 FidFile: CARBON  
 Pulse Sequence: CARBON (s2pul)  
 Solvent: cdcl3  
 Data collected on: Jan 3 2020

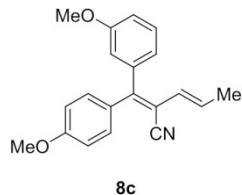

Temp. 25.0 C / 298.1 K  
 Operator: Liu

Relax. delay 1.000 sec  
 Pulse 45.0 degrees  
 Acq. time 0.865 sec  
 Width 37878.8 Hz  
 240 repetitions  
 OBSERVE C13, 150.7898050 MHz  
 DECOUPLE H1, 599.6836825 MHz  
 Power 45 dB  
 continuously on  
 WALTZ-16 modulated  
 DATA PROCESSING  
 Line broadening 0.5 Hz  
 FT size 65536  
 Total time 31 min

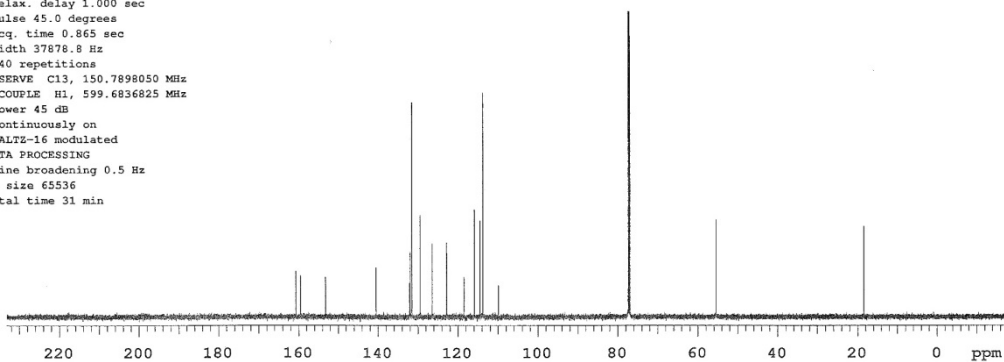

Sample Name:  
 Data Collected on: nmr18-vnmr500  
 Archive directory:  
 Sample directory:  
 FidFile: PROTON  
 Pulse Sequence: PROTON (s2pul)  
 Solvent: cdcl3  
 Data collected on: Oct 4 2019  
 Temp. 25.0 C / 298.1 K  
 Operator: Liu  
 Relax. delay 10.000 sec  
 Pulse 45.0 degrees  
 Acq. time 2.045 sec  
 Width 8012.8 Hz  
 4 repetitions  
 OBSERVE H1, 499.8762807 MHz  
 DATA PROCESSING  
 FT size 32768  
 Total time 0 min 48 sec

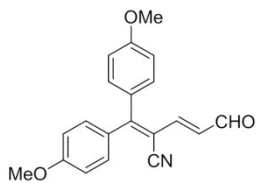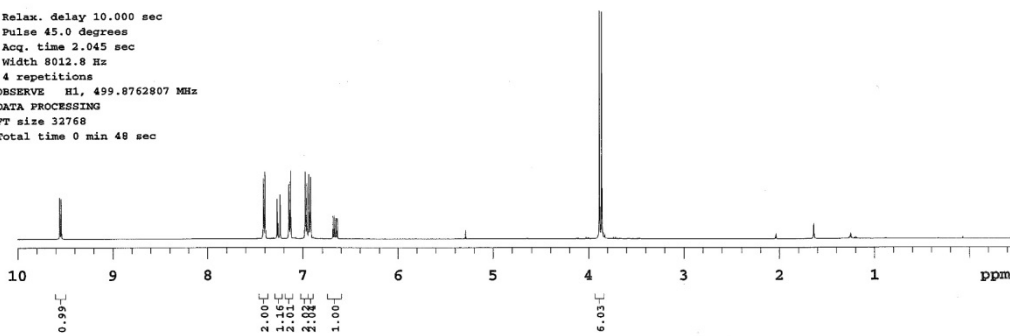

Sample Name:  
 Data Collected on: nmr18-vnmr500  
 Archive directory:  
 Sample directory:  
 FidFile: yz-4-182C-3  
 Pulse Sequence: CARBON (s2pul)  
 Solvent: cdcl3  
 Data collected on: Oct 4 2019  
 Temp. 25.0 C / 298.1 K  
 Operator: Liu  
 Relax. delay 1.000 sec  
 Pulse 45.0 degrees  
 Acq. time 1.049 sec  
 Width 31250.0 Hz  
 124 repetitions  
 OBSERVE C13, 125.6939811 MHz  
 DECOUPLE H1, 499.8787746 MHz  
 Power 45 dB  
 continuously on  
 WALTZ-16 modulated  
 DATA PROCESSING  
 Line broadening 0.5 Hz  
 FT size 65536  
 Total time 34 min

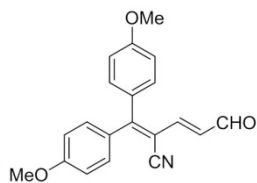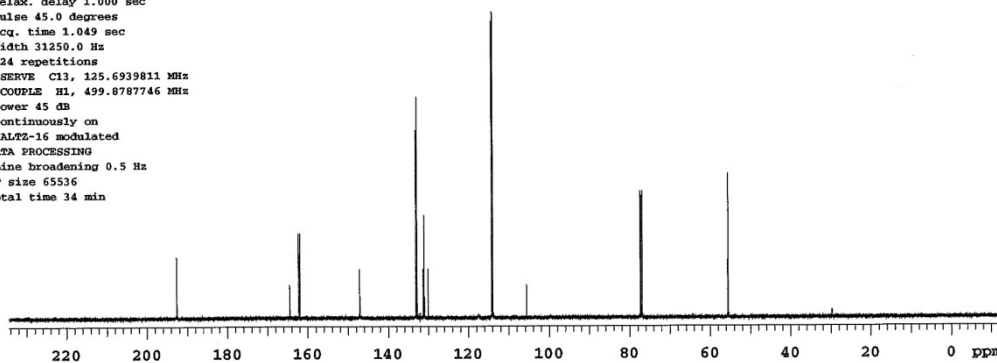

Sample Name:  
 Data Collected on:  
 nmr18-vnmrs500  
 Archive directory:  
 Sample directory:  
 FidFile: PROTON  
 Pulse Sequence: PROTON (s2pul)  
 Solvent: cdcl3  
 Data collected on: Oct 5 2019

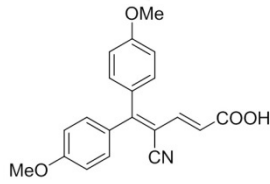

Temp. 25.0 C / 298.1 K  
 Operator: Liu

Relax. delay 10.000 sec  
 Pulse 45.0 degrees  
 Acq. time 2.045 sec  
 Width 8612.8 Hz  
 4 repetitions  
 OBSERVE H1, 499.8762807 MHz  
 DATA PROCESSING  
 FT size 32768  
 Total time 0 min 48 sec

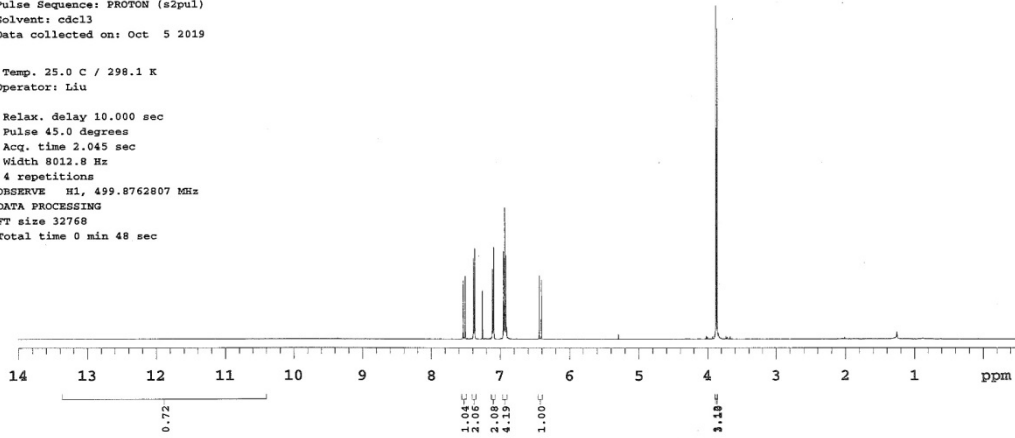

Sample Name:  
 Data Collected on:  
 nmr18-vnmrs500  
 Archive directory:  
 Sample directory:  
 FidFile: yz-4-184C-1  
 Pulse Sequence: CARBON (s2pul)  
 Solvent: cdcl3  
 Data collected on: Oct 5 2019

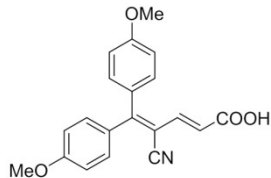

Temp. 25.0 C / 298.1 K  
 Operator: Liu

Relax. delay 1.000 sec  
 Pulse 45.0 degrees  
 Acq. time 1.049 sec  
 Width 31250.0 Hz  
 890 repetitions  
 OBSERVE C13, 125.6929715 MHz  
 DECOUPLE H1, 499.8787746 MHz  
 Power 45 dB  
 continuously on  
 WALTZ-16 modulated  
 DATA PROCESSING  
 Line broadening 0.5 Hz  
 FT size 65536  
 Total time 34 min

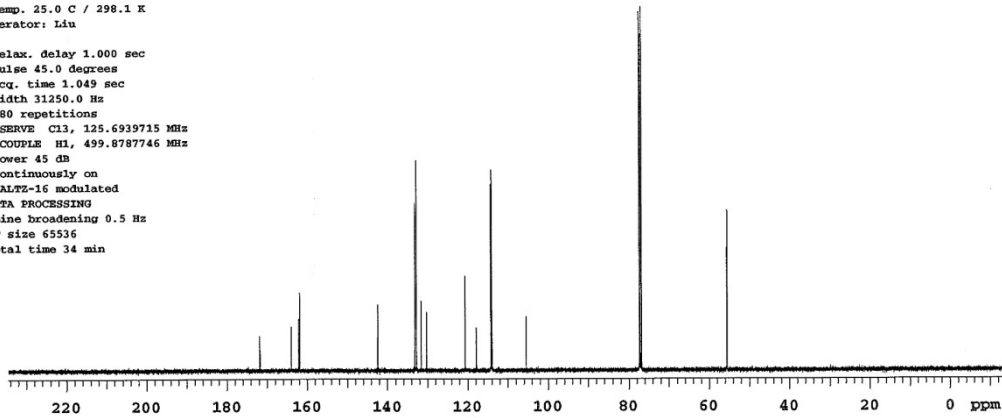

Sample Name:  
 Data Collected on:  
 nmrl9-vnmrs600  
 Archive directory:  
 Sample directory:  
 FidFile: yz-4-198-2-H  
 Pulse Sequence: PROTON (s2pul)  
 Solvent: cdcl3  
 Data collected on: Oct 30 2019

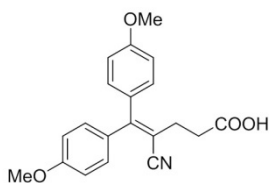

Temp. 25.0 C / 298.1 K  
 Operator: Liu

Relax. delay 10.000 sec  
 Pulse 45.0 degrees  
 Acq. time 1.704 sec  
 Width 9615.4 Hz  
 4 repetitions  
 OBSERVE H1, 599.6806838 MHz  
 DATA PROCESSING  
 FT size 32768  
 Total time 0 min 47 sec

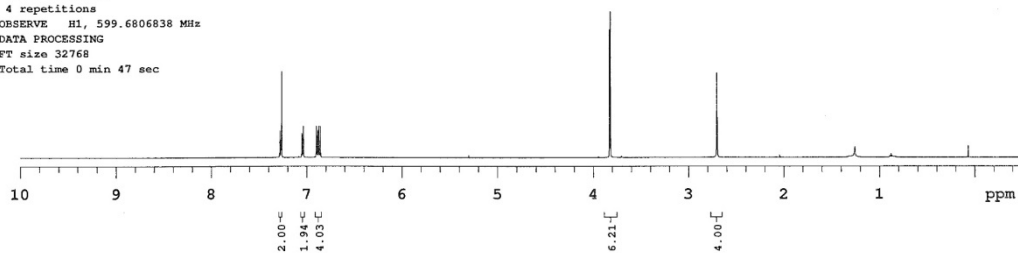

Sample Name:  
 Data Collected on:  
 nmrl9-vnmrs600  
 Archive directory:  
 Sample directory:  
 FidFile: yz-198-2-C  
 Pulse Sequence: CARBON (s2pul)  
 Solvent: cdcl3  
 Data collected on: Oct 30 2019

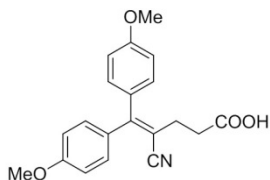

Temp. 25.0 C / 298.1 K  
 Operator: Liu

Relax. delay 1.000 sec  
 Pulse 45.0 degrees  
 Acq. time 0.865 sec  
 Width 37878.8 Hz  
 10000 repetitions  
 OBSERVE C13, 150.7898054 MHz  
 DECOUPLE H1, 599.6836825 MHz  
 Power 46 dB  
 continuously on  
 WALTZ-16 modulated  
 DATA PROCESSING  
 Line broadening 0.5 Hz  
 FT size 65536  
 Total time 5 hr, 10 min

line broadening = 0.5

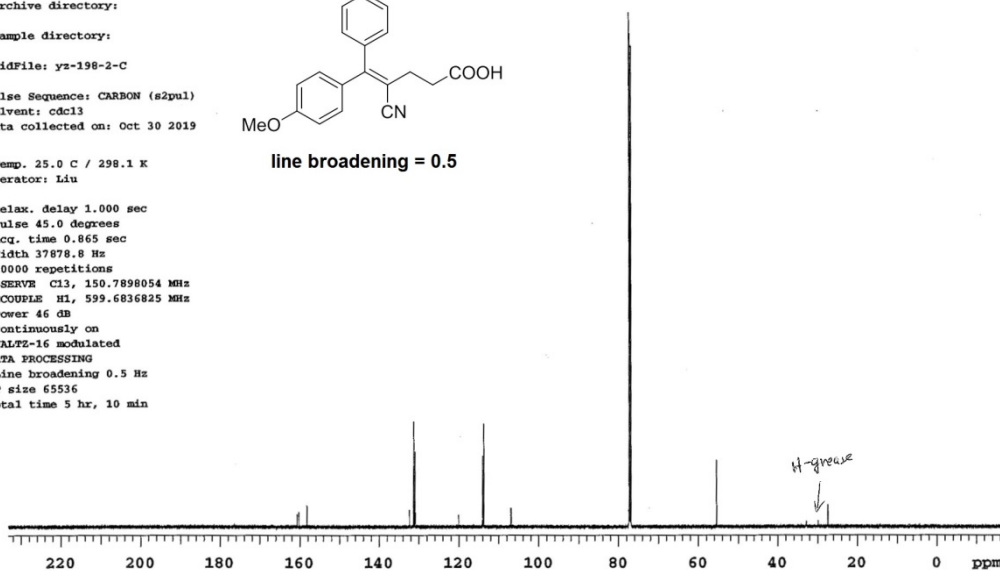

Sample Name:  
Data Collected on:  
nmr19-vnmrs600  
Archive directory:  
Sample directory:  
FidFile: yz-198-2-c  
Pulse Sequence: CARBON (s2pul)  
Solvent: cdcl3  
Data collected on: Oct 30 2019

Temp. 25.0 C / 298.1 K  
Operator: Liu  
Relax. delay 1.000 sec  
Pulse 45.0 degrees  
Acq. time 0.865 sec  
Width 37878.8 Hz  
10000 repetitions  
OBSERVE C13, 150.7898050 MHz  
DECOUPLE H1, 599.6836825 MHz  
Power 46 dB  
continuously on  
WALTZ-16 modulated  
DATA PROCESSING  
Line broadening 4.0 Hz  
FT size 65536  
Total time 5 hr, 10 min

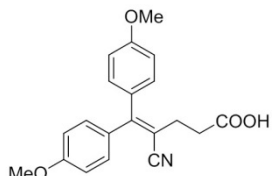

line broadening = 4.0

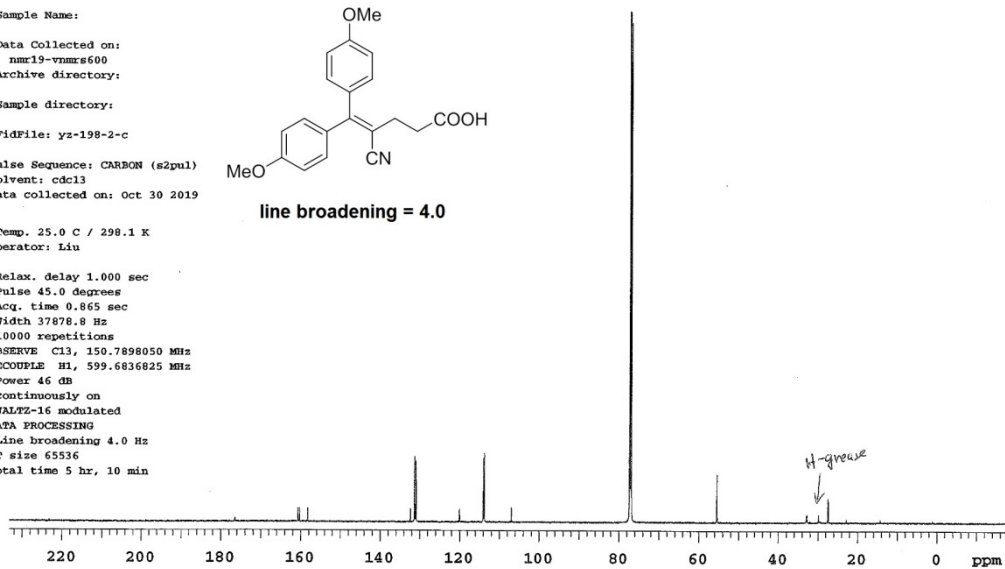

## References:

1. (a) Xu, S.; Zhang, Y.; Li, B.; Liu, S.-Y. *J. Am. Chem. Soc.* **2016**, *138*, 14566-14569. (b) Xu, S.; Haeffner, F.; Li, B.; Zakharov, L. N.; Liu, S.-Y. *Angew. Chem. Int. Ed.* **2014**, *53*, 6795-6799.
2. Huang, S.; Kotzner, L.; De, C. K.; List, B. *J. Am. Chem. Soc.* **2015**, *137*, 3446-3449.
3. Liu, J.; Ren, Q.; Zhang, X.; Gong, H. *Angew. Chem. Int. Ed.* **2016**, *55*, 15544-15548.
4. Li, H.; Zhang, Z.; Shangguan, X.; Huang, S.; Chen, J.; Zhang, Y.; Wang, J. *Angew. Chem. Int. Ed.* **2014**, *53*, 11921-11925.
5. Ren, H.; Krasovskiy, A.; Knochel, P. *Org. Lett.* **2004**, *6*, 4215-4217.
6. Stille, J. K.; Simpson, J. H. *J. Am. Chem. Soc.* **1987**, *109*, 2138-2152.
7. Lehr, K.; Schulthoff, S.; Ueda, Y.; Mariz, R.; Leseurre, L.; Gabor, B.; Fürstner, A. *Chem. Eur. J.* **2015**, *21*, 219-227.
8. Baladi, T.; Granzhan, A.; Piguel, S. *Eur. J. Org. Chem.* **2016**, 2421-2434.
9. Dolby, L. J.; Wilkins, C.; Frey, T. G. *J. Org. Chem.* **1966**, *31*, 1110-1116.
10. Park, S.; Malcolmson, S. J. *ACS Catal.* **2018**, *8*, 8468-8476.
11. Kinoshita, H.; Ishikawa, T.; Miura, K. *Org. Lett.* **2011**, *13*, 6192-6195.
12. Dateer, R. B.; Pati, K.; Liu, R. S. *Chem. Commun.* **2012**, *48*, 7200-7202.
13. Kraus, G. A.; Dong, P.; Qu, Y.; Evans, A.; Carpenter, S. *Tetrahedron Lett.* **2016**, *57*, 5185-5187.
14. Mokar, B. D.; Liu, R. S. *Chem. Commun.* **2014**, *50*, 8966-8969.
15. Rossi, R.; Carpita, A. *Tetrahedron Lett.* **1986**, *27*, 2529-2532.
16. Andreini, B. P.; Carpita, A.; Rossi, R. *Tetrahedron Lett.* **1988**, *29*, 2239-2242.
